# Supplementary material for: Abrupt and altered cell-type specific DNA methylation profiles in blood during acute HIV infection persists despite prompt initiation of ART
Source: PLoS Pathog. 2021 Aug 13;17(8):e1009785. doi: 10.1371/journal.ppat.1009785 (PMC8386872; doi:10.1371/journal.ppat.1009785)
Supplement: S5 Data — (XLSX) [file ppat.1009785.s019.xlsx]

## Sheet: MonoExpression
Gene	AHI_1_Mono	AHI_2_Mono	AHI_5_Mono	AHI_6_Mono	AHI_7_Mono	AHI_8_Mono	AHI_9_Mono	AHI_10_Mono	AHI_11_Mono	AHI_12_Mono	AHI_15_Mono	AHI_16_Mono	AHI_17_Mono	AHI_18_Mono	AHI_19_Mono	AHI_20_Mono	AHI_21_Mono	AHI_1_Mono_Post	AHI_2_Mono_Post	AHI_5_Mono_Post	AHI_6_Mono_Post	AHI_7_Mono_Post	AHI_8_Mono_Post	AHI_9_Mono_Post	AHI_10_Mono_Post	AHI_11_Mono_Post	AHI_12_Mono_Post	AHI_15_Mono_Post	AHI_16_Mono_Post	AHI_17_Mono_Post	AHI_18_Mono_Post	AHI_19_Mono_Post	AHI_20_Mono_Post	AHI_21_Mono_Post	twd	logFC	logCPM	PValue	Pvalue_fdr
IFI27	18.1667	4.30409	0.274611	427.237	1228.39	346.01	13.3589	1563.36	26.301	1567.21	1595.29	448.785	61.1067	100.313	1456.57	371.892	1819.97	1.59475	0.803748	0	0	0.926508	10.4434	2.45868	0.607364	0.598707	0.0979587	0	0.324208	0.237241	2.25479	2.61786	34.7666	2.19877	1.81148	7.45934	8.38462	9.64418e-17	1.34748e-12
USP18	31.322	41.0971	3.56994	50.8525	88.7726	152.435	12.5844	19.5882	16.1158	69.3805	49.8471	39.9658	25.5537	26.3212	130.574	45.3665	62.7527	8.77113	7.23373	3.00279	4.9933	3.93766	26.7077	10.8182	4.09971	4.07121	1.6653	1.67203	7.6189	2.13517	7.47642	10.3405	5.76773	4.39754	0.401411	2.89002	4.95966	6.23176e-16	2.90234e-12
ISG20	40.8752	43.1798	17.4378	32.1899	105.787	138.619	13.5525	65.947	18.5654	71.0349	95.51	22.4393	14.9989	28.2952	154.527	56.5902	151.413	13.5554	14.0656	7.56258	14.2032	6.36974	21.058	11.0641	5.9218	12.2136	9.11016	12.8189	11.1852	5.21931	14.3595	7.4609	5.76773	14.3919	0.312066	2.50537	5.30084	5.68165e-16	2.90234e-12
RSAD2	172.584	217.704	15.5155	195.144	340.295	1042.17	36.7853	127.106	62.4004	327.981	265.427	126.935	83.7903	114.278	652.05	411.883	442.436	37.8753	30.7434	16.4597	16.8663	16.9088	113.165	42.6581	25.9648	25.7444	15.3795	11.1469	25.2882	11.5062	46.4013	71.5985	36.0483	30.1831	0.495995	3.00126	7.29085	3.37778e-15	1.17986e-11
LGALS3BP	362.865	67.477	29.7953	318.517	871.636	609.892	100.482	407.435	136.791	495.176	385.133	357.568	150.267	114.351	768.116	404.997	485.038	102.728	18.2853	20.5747	38.5039	49.9156	204.588	53.4763	24.4464	45.9807	10.9714	30.0966	30.6377	36.7724	72.8655	73.1692	50.1472	43.5756	0.43173	2.73611	7.70657	5.07611e-15	1.41847e-11
CCL2	68.9083	85.8041	8.10102	8.51718	88.9575	160.724	5.22738	336.482	58.7905	62.5562	39.4774	17.1282	7.68464	1.5354	197.093	22.2588	57.2835	8.37244	3.01406	0.778501	4.66042	3.01115	13.5251	6.8843	6.37732	5.86733	1.1755	2.04359	1.13473	0.474483	10.3246	4.97394	3.20429	2.59854	0.765406	3.91849	5.34441	7.54718e-15	1.75749e-11
CXCR2P1	145.021	101.771	35.974	164.958	422.225	563.533	64.0838	204.37	135.631	368.099	355.297	155.216	41.9414	152.882	642.469	184.013	305.848	48.9057	59.8792	27.6924	32.29	51.8845	103.236	22.6199	34.4679	46.3399	23.5101	49.6036	32.2587	18.0304	80.1045	82.7244	30.9214	31.3824	0.339716	2.37087	7.18291	1.3864e-14	2.61164e-11
IFITM1	349.866	212.15	48.4688	243.115	558.897	541.734	92.3504	428.546	149.684	468.499	538.676	251.745	133.694	251.367	723.086	397.735	565.062	108.177	82.1832	25.5793	49.1563	36.8287	174.285	64.7862	32.0385	51.848	24.6856	73.012	109.096	30.3669	123.776	140.841	68.8923	58.967	0.311483	2.24247	7.75771	1.49535e-14	2.61164e-11
CXCL10	27.2501	85.3876	47.3704	51.9798	94.8757	712.897	36.3981	20.0235	47.5739	82.9257	92.963	114.055	33.0532	42.2601	398.019	285.969	431.641	16.3462	23.9115	8.78594	15.0909	9.03346	38.692	7.13017	8.35126	18.5599	4.60406	6.31656	31.7724	3.67724	26.8202	20.812	27.7171	17.3903	0.595222	3.17621	6.45615	5.88378e-14	9.13425e-11
PLAC8	843.344	724.615	413.289	1109.86	1919.71	2624.86	643.936	778.305	1137.52	1699.46	2350.64	1041.77	599.309	1045.83	2544.83	841.402	1650.28	449.055	471.599	175.052	374.942	413.107	753.295	261.849	285.006	548.056	136.75	386.611	464.915	292.519	613.897	291.237	197.705	440.953	0.206402	1.74045	9.72946	6.7463e-14	9.42593e-11
EPSTI1	224.422	332.526	50.6657	266.913	396.517	357.063	188.186	182.388	182.689	334.908	261.606	257.321	188.412	147.91	406.915	359.442	366.729	113.493	138.245	26.5803	62.8047	63.8133	164.869	135.473	41.4526	81.9031	46.8242	33.998	113.635	27.6386	67.5252	120.814	59.7601	66.3628	0.203705	1.71932	7.46057	1.6218e-13	2.05998e-10
OASL	95.6886	92.052	50.1165	79.7859	147.399	256.207	24.2008	202.411	40.8697	172.366	82.4114	65.5917	47.0337	41.8214	171.362	138.552	173.002	38.1411	22.9068	7.89623	17.3101	18.1827	62.6604	41.5517	18.3728	17.123	11.1673	8.54594	27.2335	5.69379	27.2949	40.0533	28.5182	35.3802	0.294174	2.12509	6.14143	1.82487e-13	2.12476e-10
ISG15	459.493	594.242	84.9921	361.729	652.848	1699.65	148.303	179.994	257.724	802.787	1006.4	306.183	223.595	295.016	602.229	163.734	985.621	132.63	128.801	42.9288	75.6763	69.3723	302.859	129.45	46.4634	87.531	43.1018	64.8377	100.18	28.5876	174.925	26.7022	16.0215	113.736	0.426427	2.4738	8.27705	5.78874e-13	5.77716e-10
GMPR	23.1783	20.4097	4.25647	35.697	48.64	61.5572	5.22738	35.0411	17.4051	43.6342	41.1148	17.7921	19.4431	17.1819	92.1137	39.2359	53.1095	8.90402	6.22905	2.89158	7.21255	5.44324	21.7428	12.7851	3.18866	6.82526	3.23264	2.78672	4.70102	2.60966	6.17102	13.3511	5.28708	4.59743	0.304291	2.26275	4.50031	5.71487e-13	5.77716e-10
NR_049759-T08961	24.1179	16.5222	1.92228	22.6707	31.9951	24.8685	5.03378	26.9882	12.1191	27.0905	29.2897	19.2526	12.3139	14.6229	40.7873	27.7292	32.6717	8.50533	9.84591	1.44579	2.88502	2.20046	10.957	3.93389	3.03682	3.35276	1.86121	5.01609	9.88835	2.25379	5.10296	11.9113	4.80644	2.39866	0.214182	2.0195	3.97085	7.69233e-13	6.94052e-10
IFITM3	1035.97	647.002	105.176	727.592	1512.09	1217.02	317.902	1074.96	457.173	1065.52	1179.41	719.384	431.821	576.287	1469.85	933.833	1234.76	368.52	311.251	62.2801	154.46	126.121	512.754	193.252	93.6859	150.275	58.5793	204.545	336.528	89.9145	340.355	356.16	183.606	145.119	0.290985	1.99314	9.09785	7.94791e-13	6.94052e-10
ZBP1	38.3694	50.5384	12.2202	48.097	80.0803	136.316	15.8758	48.7529	18.1786	50.5619	47.8459	36.6464	19.8134	24.6395	135.912	104.975	80.312	9.5685	18.2853	10.5654	12.9826	9.26508	26.7077	14.3833	5.76996	10.2978	9.0122	7.98859	13.4546	4.98207	14.8342	25.0006	23.3913	9.39474	0.275213	2.05066	5.20803	8.92053e-13	7.33162e-10
HESX1	4.07185	5.41482	0.686527	9.26869	27.0017	71.8424	1.93607	8.70587	4.25458	28.2278	17.2828	8.23215	5.18481	3.5826	49.4102	15.185	22.5967	1.06317	0	0.667287	0.776736	0.694881	7.70415	1.35227	0.607364	0.718448	1.07755	0.371563	1.45894	0.474483	1.54275	1.8325	2.40322	0.799552	0.631502	3.46454	3.47563	2.05844e-12	1.58056e-09
FFAR2	103.989	100.799	263.764	151.681	260.769	229.036	63.3094	128.412	57.5012	111.257	76.9537	51.6501	61.1993	78.1592	160.138	122.612	219.922	30.4331	56.6642	26.6915	53.4838	39.3766	75.6719	97.2408	32.3421	31.971	19.3958	35.2984	18.9662	36.6538	31.8045	33.6395	27.8774	60.766	0.201917	1.65369	6.48553	2.26247e-12	1.58056e-09
CD2AP	54.0304	61.0903	33.5025	68.0122	89.8822	104.386	62.9222	73.9999	60.4665	80.0306	52.394	53.3762	48.7928	56.0056	120.72	68.1912	64.3359	42.7925	40.3883	29.027	28.7392	38.7975	47.2521	43.5186	30.5201	33.0486	21.257	20.2502	33.8798	30.2483	36.4327	24.6079	25.6343	16.5907	0.0719794	1.07407	5.71045	2.21598e-12	1.58056e-09
MX1	561.759	645.614	131.127	684.004	996.287	965.113	228.262	628.346	375.563	1128.49	597.438	460.868	454.597	443.073	1332.43	887.806	849.033	233.365	233.288	101.65	116.621	164.571	449.409	290.493	166.721	194.58	177.011	60.3789	178.801	85.1697	275.797	399.093	156.209	151.515	0.231229	1.72143	8.78946	2.73777e-12	1.82153e-09
SERPING1	128.263	151.337	15.1036	147.422	515.621	364.892	88.2847	297.088	97.0817	301.717	203.936	132.246	65.3657	56.2249	561.305	214.194	496.84	39.603	68.9214	10.0093	20.639	20.0357	168.122	52.124	8.80678	36.5211	11.6571	12.6331	35.3387	8.77793	41.1797	34.5558	24.5128	32.3819	0.496838	2.61809	7.07164	3.10967e-12	1.97492e-09
DANCR	7.36066	12.3569	12.0829	6.51313	2.5892	4.75879	17.0374	7.18234	14.4398	5.99712	9.46003	7.43549	15.1841	11.8445	3.96924	6.60219	6.04499	15.0172	22.1031	25.1345	27.1858	26.4055	23.9685	12.0475	22.1688	14.2492	27.0366	32.1402	17.0209	39.0262	20.7678	9.68608	25.9548	23.3869	0.0844073	-1.34808	4.16587	7.79453e-12	4.73501e-09
IFIT3	71.5707	124.263	18.8109	72.7717	166.634	320.834	40.4638	55.0646	33.5209	210.209	162.276	117.375	73.6058	100.971	334.237	231.548	298.795	26.1805	41.7949	17.9055	7.54544	13.2027	93.477	25.6932	19.2838	17.9612	11.755	7.24547	34.5282	8.65931	41.6544	65.8392	23.3913	23.5868	0.419187	2.33713	6.47192	9.98359e-12	5.81211e-09
GBP1	211.893	379.315	111.08	279.188	684.843	932.416	317.709	126.888	215.049	489.593	205.756	549.297	212.763	156.538	734.172	641.922	813.627	129.839	260.414	49.9353	64.5801	77.4793	294.127	69.4577	56.1812	139.02	37.7141	26.5667	182.043	71.7655	81.8846	119.636	82.6708	69.7609	0.331165	1.96292	8.05011	4.07727e-11	2.27871e-08
KLHDC7B	9.86642	6.52556	2.6088	23.6727	27.5565	13.0483	8.5187	16.1059	13.5373	40.2221	30.5632	31.0697	4.90706	35.168	75.1418	36.0291	50.8067	2.92371	4.62155	4.11493	3.43983	1.27395	5.99212	4.91736	2.12577	4.07121	2.44897	3.71563	6.64627	1.42345	16.1396	7.33001	6.5688	7.59575	0.362917	2.28502	4.11144	4.39899e-11	2.36395e-08
CUL1	86.4486	166.61	56.4326	141.285	190.491	166.558	119.649	126.235	96.1792	174.434	193.749	126.403	107.677	104.115	247.461	206.649	161.631	64.3216	113.73	52.0484	44.3849	56.8644	116.247	72.7769	55.422	69.5697	46.0406	50.3467	74.5679	46.6179	84.9701	80.6301	57.9977	53.7699	0.104011	1.10888	6.77395	4.91261e-11	2.54218e-08
OAS1	516.499	517.602	129.204	372.877	523.018	855.2	245.3	278.153	235.807	708.694	632.185	370.845	379.51	416.313	857.766	678.611	666.1	243.598	233.288	176.831	98.5345	137.586	347.714	193.375	221.232	114.353	121.469	184.295	158.052	167.73	229.04	313.881	187.772	190.893	0.158731	1.3281	8.45262	5.50304e-11	2.74602e-08
TGM2	30.2257	11.385	16.4767	20.5414	37.3585	34.3861	15.1013	185.435	29.5242	19.7491	15.4635	11.6843	7.68464	19.814	24.226	28.4838	43.8981	9.7014	12.659	4.55979	8.65506	9.84415	4.45129	6.63844	13.0583	9.45957	2.44897	4.45875	3.8905	5.10069	9.3752	4.05768	4.3258	10.1943	0.338529	2.13602	4.46187	5.94607e-11	2.86478e-08
IFIT1	207.195	408.75	12.3575	174.352	530.971	2492.07	64.8583	41.1352	69.6203	287.035	285.802	187.879	159.248	141.842	801.786	256.448	318.801	60.4676	63.2952	19.685	16.8663	31.9645	202.534	54.8286	21.5614	29.0972	9.11016	11.1469	49.1176	13.0483	81.766	84.0333	28.5182	22.5873	0.731225	2.99332	7.74918	8.27966e-11	3.85611e-08
GBP1P1	1.72271	5.55367	0.961138	3.75758	7.7676	22.2588	4.45296	9.14116	1.67604	13.8554	8.18657	10.091	2.68499	2.99769	35.5863	22.7304	34.2549	0.398688	0.803748	1.00093	0.554812	0.115814	5.47851	0.368802	0.911046	0.359224	0	0.557344	1.78315	0.593104	1.7801	1.8325	2.56343	1.5991	0.542714	3.05465	3.04165	9.32195e-11	4.12105e-08
DDX58	89.7374	178.828	32.4041	128.384	164.044	229.957	69.6984	28.0764	57.7591	137.417	87.1415	118.171	101.011	92.4165	218.719	232.02	149.829	51.1649	45.2108	49.7129	30.8475	41.1138	64.8861	45.7314	36.4419	46.8189	36.4406	23.2227	45.7134	42.229	67.1691	74.0855	43.0977	39.9776	0.175199	1.41861	6.46386	9.43842e-11	4.12105e-08
CD38	34.1409	26.1022	27.1865	66.5091	70.2783	25.6361	52.8546	42.8764	53.5045	54.9047	40.0232	36.1153	18.9801	33.267	87.4601	66.6822	128.672	20.2002	25.7199	23.0214	33.1777	18.5302	25.1669	14.2603	13.8175	23.5891	9.30607	10.5895	24.964	9.48966	19.1064	17.9323	13.6182	23.5868	0.152333	1.39797	5.22831	1.01336e-10	4.29049e-08
GBP5	151.755	411.249	116.847	334.925	483.995	372.567	397.087	287.511	215.823	386.091	251.419	473.216	122.121	195.508	893.078	1247.53	1093.42	88.2428	279.102	59.2773	99.5332	47.1361	275.98	95.028	71.2135	158.897	46.3344	50.5325	199.712	46.0248	87.3436	153.93	140.028	77.5566	0.342501	1.91789	8.14139	2.09791e-10	8.62119e-08
LY6E	1016.24	849.711	128.518	822.534	1191.77	1402	358.56	570.017	506.037	779.523	1163.22	611.304	671.526	608.457	1436.45	875.357	965.327	358.42	294.373	76.0707	231.024	151.832	880.156	398.921	98.393	230.502	94.726	155.499	281.089	181.846	304.753	348.961	134.26	193.891	0.262318	1.65976	9.0939	2.18802e-10	8.73459e-08
ICAM2	158.646	172.164	72.36	108.97	188.642	357.523	140.365	154.312	148.137	165.128	169.917	196.51	142.86	155.222	182.859	91.6762	162.207	104.456	91.4264	59.1661	65.9116	101.684	120.014	66.6302	81.5386	84.4177	52.8977	70.4111	104.719	100.235	96.8375	81.6773	45.6612	59.3668	0.0893899	0.984049	6.96741	2.8911e-10	1.12207e-07
CTSL1	148.466	76.6406	74.4196	73.398	137.967	289.826	94.2865	356.07	93.9874	112.291	182.651	75.0188	46.2004	205.671	212.696	45.1779	151.988	75.0861	51.038	42.5951	37.8382	39.2608	32.3574	42.781	48.8928	39.7541	24.9795	74.3125	53.6565	34.7559	73.6962	70.0278	16.1817	74.1585	0.21431	1.50107	6.60511	4.55154e-10	1.71876e-07
C1QB	68.2819	5.55367	21.2823	27.1798	152.023	776.911	59.8245	202.411	107.396	67.0023	310.18	126.536	45.6449	76.2582	74.3205	21.5043	143.64	14.8843	3.01406	6.8953	14.4251	15.519	31.6726	4.54856	12.2991	47.5373	1.07755	34.1838	43.2818	26.571	36.4327	13.8747	6.88923	19.9888	0.678161	2.75251	6.30701	5.08487e-10	1.82169e-07
SAMD4A	4.38507	2.49915	3.15803	8.14142	7.95254	13.5088	3.87214	5.00588	2.96531	7.4447	6.18541	7.83382	3.33309	5.26423	13.4133	6.79083	7.48427	1.32896	1.00469	1.11214	2.77406	0.694881	2.22564	0.983472	1.36657	3.4725	0.979587	0.743125	3.24208	0.830345	1.54275	4.45036	1.60215	0.799552	0.0638734	1.82079	2.61798	4.99042e-10	1.82169e-07
RUFY4	5.32473	20.8262	2.05958	12.4	29.036	20.8773	10.842	7.18234	4.51243	14.786	16.737	14.2071	5.55516	5.19112	28.6059	19.7123	15.1125	3.1895	8.43936	2.89158	2.99598	3.12697	8.90257	2.95042	4.09971	2.75405	2.44897	2.41516	2.43156	1.66069	2.84816	5.23572	4.80644	3.19821	0.19613	1.81126	3.44088	5.89243e-10	2.05823e-07
XAF1	423.786	576.054	86.0905	433.624	693.906	785.661	268.145	183.041	225.75	564.143	305.996	429.134	301.738	235.136	529.551	492.524	438.837	222.202	268.05	82.966	87.9931	132.375	390.344	184.401	99.7596	113.275	89.6322	56.8491	168.913	95.8455	156.53	188.093	89.2396	128.928	0.209722	1.44289	8.15104	6.34195e-10	2.16121e-07
ANKRD22	13.4684	49.8442	8.65025	21.5434	36.0639	59.2546	24.7817	23.9411	20.8861	61.5222	31.4728	30.6714	13.6101	7.09209	127.7	74.6048	117.014	8.90402	29.3368	6.00558	3.43983	5.90649	22.0852	7.13017	1.82209	12.6926	4.5061	3.52984	17.3451	2.60966	6.64571	12.0422	7.20966	9.59463	0.415471	2.15881	4.82347	8.16679e-10	2.71682e-07
SPIC	2.50576	0.138842	1.51036	2.3798	5.73323	67.5441	3.29131	7.39999	3.22316	15.5098	12.007	8.36493	1.94431	4.24063	8.89657	0.282951	4.17392	0.531583	0	0.556072	0.443849	0.231627	0.51361	0.122934	0.455523	0.83819	0.489793	0.557344	0	0.711724	2.13612	2.61786	0.320429	0.199888	0.787414	3.52935	2.75681	1.07847e-09	3.48089e-07
IFIT2	324.965	732.529	239.461	279.689	344.364	1451.89	180.248	117.965	136.017	592.061	295.08	301.005	270.999	261.164	886.919	861.303	733.171	147.913	226.456	77.5165	65.9116	64.9714	400.616	144.079	122.232	87.4112	51.4283	38.4567	111.528	49.9393	142.408	257.597	109.427	76.757	0.35776	1.87687	8.24981	1.09619e-09	3.48089e-07
APOBEC3A	856.029	1395.5	307.976	424.105	1446.25	1997	531.257	2100.94	100.305	1890.75	613.265	678.887	415.155	715.862	1932.33	1363.45	1041.9	269.38	361.285	73.2903	158.01	284.206	655.024	349.993	202.252	40.8318	142.726	17.2777	297.947	83.8649	381.535	370.165	314.982	243.664	0.43048	2.06474	9.3608	1.14992e-09	3.57036e-07
RIN2	194.04	203.264	276.259	174.602	223.596	270.637	140.752	165.412	152.907	162.129	177.921	140.743	157.211	124.952	231.037	164.489	111.832	125.719	95.0432	79.2959	117.287	101.221	125.15	136.334	129.369	112.796	66.6119	90.4755	104.719	88.2538	111.434	122.254	80.7482	73.5588	0.0620177	0.791124	7.18457	1.49814e-09	4.55045e-07
C2	5.01151	2.22147	0.961138	5.88687	14.0557	10.7457	2.71049	10.2294	7.99344	9.71947	9.09619	8.36493	3.24051	4.75243	10.8127	4.14995	10.075	2.52502	2.21031	0.778501	2.55213	1.04232	4.79369	0.983472	0.911046	2.63431	1.07755	1.48625	4.0526	1.89793	2.72949	1.30893	0.480644	1.99888	0.0971225	1.76912	2.71876	1.59162e-09	4.63294e-07
GCH1	33.2013	51.3714	53.8237	48.3475	62.5107	158.268	36.2045	34.3882	36.2284	43.2206	55.1229	45.2769	40.5527	51.6918	75.0049	48.1017	78.1531	28.1739	41.9958	25.0233	23.9679	22.2362	35.4391	18.0713	17.3099	32.8091	9.69791	21.1791	31.7724	23.4869	30.3804	29.8436	15.5408	22.3875	0.114421	1.13445	5.42639	1.57456e-09	4.63294e-07
SAMD9L	84.5693	85.8041	16.8886	74.6505	155.722	299.957	52.8546	20.8941	21.015	114.979	106.425	83.6493	58.0514	56.6636	172.73	136.76	113.847	34.0213	48.4258	20.4635	11.2072	32.7752	67.6253	31.4711	21.4096	11.9741	11.853	16.163	26.0988	26.0966	49.7241	42.5402	19.5462	18.1898	0.305334	1.74466	6.03681	1.83648e-09	5.23658e-07
IFIH1	32.2616	32.7666	51.4896	72.7717	90.4371	144.145	17.231	48.3176	28.3638	95.8506	81.5018	37.8414	22.2206	87.7372	246.777	105.541	128.96	16.2133	21.7012	30.584	18.4197	12.392	20.8868	24.9556	15.6396	16.5243	18.4162	17.4634	18.3178	11.3876	54.8271	47.9068	35.4074	19.9888	0.288704	1.70656	5.74382	1.98593e-09	5.54949e-07
DDX60	79.2446	85.2488	33.2279	57.8667	100.239	130.943	33.6876	45.0529	45.2532	122.217	84.9584	67.8489	61.0142	81.23	133.585	160.245	92.5459	39.4701	36.7715	31.6961	12.8716	33.8176	68.3101	33.6839	26.4203	36.2816	22.3346	19.6928	35.0145	26.571	53.759	57.8547	32.0429	29.9832	0.150485	1.2361	5.95238	2.11904e-09	5.80533e-07
CHMP5	110.88	162.167	92.4066	99.9516	157.571	324.519	88.0911	112.741	94.5031	207.935	204.846	151.897	119.806	149.153	241.439	147.04	203.227	75.219	66.1083	63.8371	49.933	80.0272	109.913	71.1788	82.7534	62.6247	65.3384	79.7002	79.1068	56.7007	118.436	91.6251	78.8256	105.541	0.101736	0.983664	6.92152	3.08539e-09	8.2902e-07
IFI35	216.591	232.421	52.7253	180.739	273.161	370.418	99.7075	139.294	96.6949	240.815	205.756	185.755	167.025	100.313	366.812	277.009	382.993	111.898	110.917	55.7184	52.3742	87.2076	191.405	91.7088	61.9512	63.5827	50.5467	52.9477	99.532	67.0207	94.7014	97.6462	77.0633	126.929	0.173583	1.25799	7.25685	3.81857e-09	1.00666e-06
MX2	481.419	495.942	166.689	444.897	532.081	765.09	205.417	273.8	116.034	569.727	311.453	298.084	340.809	246.98	705.292	852.626	500.007	225.923	178.432	129.342	115.068	137.586	370.655	258.407	123.447	104.893	112.359	78.0281	186.744	115.062	158.904	277.755	179.601	184.896	0.192215	1.30899	8.26006	4.17155e-09	1.07935e-06
CMPK2	112.133	197.572	22.3808	123.75	195.485	211.536	45.6912	65.7293	35.9705	125.112	140.081	79.4005	103.974	69.3124	236.922	174.77	139.898	55.1518	63.0942	14.7915	22.6363	28.1427	122.068	69.9494	18.9801	26.1036	21.8448	14.8625	36.7976	12.6924	39.9929	55.7604	31.2419	27.1848	0.292412	1.6483	6.38092	4.70875e-09	1.19619e-06
CXCL11	1.72271	3.60988	0.823833	3.50707	3.32897	7.52196	1.16164	3.04705	1.80497	7.9617	6.00348	6.37328	1.01845	1.97409	12.7289	5.84766	13.6732	0.930271	1.20562	0.111214	0.221925	0.694881	1.54083	0.368802	0.151841	0.478966	0.489793	0.557344	2.10735	0.355862	1.06806	1.17804	0.961288	0.199888	0.23606	2.50882	2.27615	4.83343e-09	1.20594e-06
SPATS2L	8.14371	6.10903	2.19689	10.1455	16.8298	38.9914	4.45296	7.61764	5.80169	17.5778	7.27695	7.03716	4.25895	7.45766	24.6366	11.8839	12.5218	2.65792	1.40656	1.557	1.55347	2.77953	8.90257	3.56509	3.03682	2.63431	2.44897	1.11469	3.07998	2.96552	4.74694	3.40322	2.56343	2.39866	0.23379	1.87087	3.21192	5.21382e-09	1.25599e-06
CPSF6	138.443	136.065	153.508	119.867	74.532	66.1625	150.432	83.3587	167.604	89.75	57.4879	106.752	159.155	77.6474	79.7954	117.142	120.756	206.919	207.367	162.596	242.342	213.329	221.537	175.304	188.89	214.457	197.681	134.506	194.039	243.528	116.537	194.376	179.12	236.867	0.0733104	-0.822506	7.29969	5.13948e-09	1.25599e-06
RARRES3	71.2575	73.5861	53.4118	36.5738	116.144	112.522	63.503	141.035	78.2584	132.557	154.089	86.7032	49.7187	100.313	214.886	70.7378	198.477	45.1846	50.8371	31.3625	26.1871	41.3454	59.4076	30.2418	38.5676	33.6473	32.4243	68.5533	48.307	33.6883	86.3942	45.1581	47.2633	42.3763	0.151781	1.19411	6.26622	5.50336e-09	1.30327e-06
AIM2	15.3478	47.6227	4.25647	8.89293	50.3045	96.8644	17.6182	7.61764	14.9555	25.8497	38.3859	51.9157	13.9805	18.571	61.7285	19.9009	31.3764	9.83429	22.1031	3.89251	1.99732	6.60137	20.202	3.81095	3.18866	4.9094	3.52651	3.52984	12.6441	8.30345	10.6806	8.90073	5.60751	7.19597	0.353482	1.91386	4.43458	5.76623e-09	1.34276e-06
NM_017654-T17132	48.7056	41.236	5.62952	39.0788	82.2996	327.589	20.5223	8.48822	24.496	34.1216	25.1055	49.5257	26.9425	21.3494	61.4547	32.1621	25.6192	17.6751	12.2572	11.1214	8.76602	13.7818	29.447	17.2108	5.31444	15.0874	4.40814	5.20188	12.6441	17.2	12.342	10.8641	8.33116	6.59631	0.425565	2.03873	5.08387	6.24423e-09	1.43024e-06
VAMP5	87.7015	102.326	47.9196	46.594	168.113	215.067	90.4144	116.876	95.7924	169.987	149.905	146.054	64.9028	91.6122	254.579	91.7705	314.051	52.0952	86.6039	30.9176	27.9625	43.0826	94.6755	42.4122	22.017	32.5697	28.7019	60.9363	83.97	42.4662	82.3593	38.0899	44.059	71.36	0.199927	1.34339	6.57439	7.00629e-09	1.5789e-06
HERC5	98.1943	161.473	37.759	113.479	117.624	250.834	40.6574	53.3235	56.212	143.207	95.6919	65.5917	71.2912	76.112	233.774	213.439	157.17	38.6727	56.4633	22.4653	27.6296	18.7618	114.021	76.0961	18.5246	34.9645	26.2529	13.9336	39.0671	15.1835	39.6369	66.8863	27.8774	40.9771	0.267037	1.54674	6.34289	8.87252e-09	1.96773e-06
TCN2	77.8351	24.8527	34.601	48.2222	183.093	117.281	26.9113	132.982	29.1374	80.5476	85.5042	66.9195	31.3866	37.2152	126.194	53.1948	146.663	32.2937	17.8834	24.5784	21.6377	26.6371	28.9334	24.218	15.9433	18.2007	18.8081	31.397	24.1535	33.8069	35.7207	43.4565	18.2645	61.3656	0.221676	1.43012	5.77983	9.19537e-09	2.00746e-06
CD40	14.5647	13.6065	14.5544	15.7818	29.7758	25.022	11.81	16.5412	14.8265	24.0919	13.2804	13.676	4.07378	17.1087	39.6924	16.5055	39.1485	7.97375	15.874	7.89623	6.54678	8.91764	8.56017	4.05682	4.70707	7.18448	2.93876	7.24547	7.29469	2.8469	11.63	6.02108	7.53009	11.3936	0.12876	1.31085	3.9541	1.12308e-08	2.41411e-06
OAS2	327.628	269.075	69.7512	231.717	527.457	461.295	98.1586	261.611	118.226	483.079	354.205	194.385	197.764	237.329	576.497	728.033	658.328	150.039	138.245	76.1819	54.1496	84.8913	231.981	147.275	104.77	63.7024	78.5629	58.7069	93.6962	62.7504	164.6	263.095	125.288	150.116	0.263804	1.49482	7.88208	1.18872e-08	2.51649e-06
C1QC	9.23998	0	4.39378	3.00606	26.2619	102.084	5.6146	3.04705	5.93062	11.4773	43.4798	9.55992	2.68499	6.87274	2.18992	0.754536	20.006	0.930271	0	1.557	2.33021	1.38976	2.39685	0.368802	1.36657	2.27509	0.0979587	2.60094	2.91787	2.01655	2.49214	0	0.160215	4.79731	0.852687	3.09438	3.3828	1.37437e-08	2.86608e-06
DDB2	7.67388	5.41482	8.10102	21.6687	29.7758	30.7019	15.1013	22.2	11.8612	21.8171	23.1043	21.5098	6.85136	22.1536	38.1868	20.9384	27.4903	4.25267	4.01874	4.67101	8.87699	3.59022	5.3073	13.8915	4.70707	8.02267	6.75915	7.24547	10.6989	6.52414	13.0541	14.0056	5.92794	7.59575	0.145047	1.34869	3.98465	1.58056e-08	3.24758e-06
HIST1H3D	5.95117	4.30409	0.961138	1.87879	3.32897	23.6404	6.38902	5.44117	7.86452	37.4303	28.0163	32.3975	0.648102	10.3091	11.0865	1.22612	5.75713	3.0566	0.200937	0.222429	0.443849	1.27395	0.684813	0.491736	7.44021	0.478966	0.685711	2.22938	3.40419	1.06759	2.37347	1.57072	0.801073	0.599664	0.624051	2.68739	3.06641	2.07399e-08	4.15854e-06
MSR1	15.1912	5.83135	14.0052	9.26869	11.4665	62.7853	9.68034	21.1117	9.92734	21.4035	15.2816	12.0827	6.48102	20.472	13.9608	7.35673	16.2639	6.77769	3.61687	7.00651	5.43715	3.01115	6.50573	2.95042	7.13653	6.46604	3.42855	7.05969	6.48417	4.86345	8.54448	5.10483	4.64623	5.99664	0.171176	1.48427	3.69423	2.08344e-08	4.15854e-06
PARP11	32.7314	43.1798	19.3601	43.9637	59.5516	71.6888	34.8492	42.2235	43.7061	50.045	44.0255	55.2351	37.127	37.5808	80.206	61.4004	56.7077	26.845	29.5377	28.6933	22.5254	25.3632	36.2951	27.1684	20.8022	32.9289	25.7631	24.3373	30.7998	24.9104	30.2617	29.32	25.7946	20.7884	0.0554035	0.801769	5.32058	2.19893e-08	4.32724e-06
PCYOX1	8.61354	7.77513	10.5725	5.13536	6.473	2.30264	7.16345	3.91764	9.66949	8.47869	5.45771	7.9666	6.29585	5.19112	4.37985	6.97946	8.6357	11.8277	16.6778	13.9018	8.5441	13.2027	15.7507	10.6953	8.5031	14.4887	17.5346	13.0047	9.56415	23.4869	13.5288	10.995	12.8172	10.794	0.0187592	-0.969989	3.60446	2.373e-08	4.60494e-06
P2RY12	11.5891	9.85776	2.88342	4.88485	29.036	58.9476	10.842	5.65882	7.86452	15.303	12.9166	16.1988	6.20326	12.5025	19.5724	6.97946	15.1125	4.65135	2.21031	4.78222	2.44117	11.5814	4.79369	3.19628	1.97393	4.19095	3.03672	1.48625	4.0526	4.38897	6.17102	4.58126	2.40322	4.59743	0.259312	1.75558	3.51367	2.49548e-08	4.77628e-06
HERC6	20.9857	19.5767	7.00258	24.1737	25.7071	57.873	8.32509	12.4059	10.9588	23.1613	18.3743	14.0743	14.3508	13.5261	35.7231	35.0859	25.9071	11.1633	13.0609	7.00651	5.32619	6.0223	15.5795	14.875	5.46628	7.90293	6.95507	4.83031	6.64627	8.65931	10.4433	10.0788	8.17095	6.19653	0.144734	1.28525	4.11624	3.73092e-08	7.04438e-06
C1QA	54.8134	5.27598	35.0129	21.4182	121.323	656.713	47.24	20.8941	61.8847	23.4715	97.875	96.7942	42.6821	42.2601	41.7454	11.318	63.7602	17.6751	2.81312	15.57	19.3074	11.6972	30.6454	4.30269	7.59205	25.026	0.587752	16.3488	26.5851	34.6373	16.9703	10.7332	1.76236	19.9888	0.696138	2.4277	5.70429	4.92365e-08	9.17243e-06
HSH2D	99.134	125.929	47.2331	149.802	114.48	180.68	82.8637	138.423	41.2565	66.8989	103.515	117.906	78.2351	76.6969	119.761	167.13	120.324	52.7596	59.2764	34.3653	56.5908	35.7864	96.9011	64.7862	50.7149	38.6765	24.1958	32.8833	92.3994	37.84	38.2128	88.6146	52.0698	27.5846	0.135362	1.04159	6.36678	6.58878e-08	1.21129e-05
TNS1	13.6251	24.2973	4.66839	21.6687	46.0508	30.3948	9.68034	181.735	13.2794	12.0976	13.0985	15.8004	9.81411	3.29014	57.2118	26.0315	21.1575	6.64479	8.23842	3.00279	4.54946	7.75951	11.9842	7.25311	18.2209	7.30422	3.52651	3.34406	7.781	5.69379	2.61081	13.8747	3.04408	3.99776	0.480169	2.05468	4.35679	6.72449e-08	1.22019e-05
PPM1K	18.0101	24.9915	6.45336	17.7859	22.3781	37.1493	11.0356	4.78823	11.7323	21.6103	22.0128	14.2071	13.425	11.7714	26.8266	34.8973	21.7332	12.0935	14.4675	5.78315	3.32887	6.833	12.8403	9.22005	4.85891	6.945	4.01631	6.68813	7.9431	8.77793	9.61254	10.6023	7.6903	5.79675	0.118847	1.20097	3.96756	7.27016e-08	1.30229e-05
PSME2	228.18	261.3	153.096	176.982	276.859	270.483	222.841	423.105	247.539	345.765	422.791	193.588	159.34	264.381	586.078	242.678	538.724	149.774	238.311	97.3126	111.961	160.518	207.156	148.627	76.3761	133.512	100.702	142.494	133.574	89.0842	255.622	158.381	147.718	158.111	0.13143	0.991847	7.82078	7.45304e-08	1.31815e-05
SETD7	29.1294	34.4327	35.5621	27.1798	21.6383	12.5878	29.041	17.847	24.496	20.7831	21.6489	25.2276	27.6832	27.2716	18.4775	37.7268	21.7332	39.7359	49.8324	49.4904	32.401	39.9557	32.3574	40.6912	48.8928	39.9936	35.7549	36.9705	46.1997	43.0593	36.1954	44.2418	37.33	31.5823	0.0320314	-0.672271	5.14198	8.20309e-08	1.43267e-05
FPR2	87.8581	46.7896	131.951	39.4546	96.7251	93.3337	41.2382	116.659	34.6812	74.964	91.6896	55.1023	45.8301	45.1115	83.2171	124.687	92.8337	39.7359	35.5659	45.3755	22.8582	28.4901	22.2564	26.6767	31.7348	55.081	28.408	31.397	46.5239	25.8593	51.5042	51.1792	45.501	52.9703	0.122951	1.00712	5.9051	8.62263e-08	1.48735e-05
APOBEC3G	86.1354	116.766	45.5854	73.0223	119.473	273.707	76.2811	72.9117	88.3147	134.211	104.06	127.2	71.9393	115.959	162.328	113.558	151.269	63.6571	63.2952	52.9381	32.29	65.0872	98.4419	43.6416	56.0294	47.4176	48.1957	49.0463	80.89	50.5324	64.677	80.1065	43.7386	60.766	0.112808	0.937555	6.47854	1.01965e-07	1.73738e-05
IL4I1	11.5891	8.05282	10.1606	16.0323	11.2815	18.2676	1.54885	9.35881	8.2513	9.20248	8.91426	6.37328	6.29585	6.79963	31.617	10.1862	17.5592	6.77769	2.81312	2.22429	5.65908	3.47441	4.79369	4.05682	1.36657	4.43043	1.27346	2.9725	5.83575	2.13517	7.1204	6.02108	1.92258	6.79619	0.141364	1.42232	3.29153	1.0712e-07	1.78176e-05
UBE2L6	239.3	228.533	103.254	201.156	365.447	481.098	142.301	427.458	155.743	414.215	300.902	217.754	159.433	219.343	605.103	367.742	616.013	152.963	199.129	84.9678	102.196	109.907	227.7	155.512	73.7948	108.845	92.6689	124.102	133.25	77.6966	208.509	175.92	160.054	197.689	0.175315	1.13013	7.84079	1.07092e-07	1.78176e-05
SIGLEC1	90.3639	81.2224	6.45336	150.929	228.589	144.913	31.3643	42.6588	19.339	58.4202	43.6617	120.96	80.4572	15.8658	78.5635	147.229	75.1306	27.9081	14.6684	3.78129	16.9772	11.2339	93.1346	53.1075	5.31444	9.69905	3.91835	1.85781	12.9683	4.62621	7.1204	34.5558	8.49138	11.7934	0.579938	2.13201	5.73777	1.11034e-07	1.80392e-05
IFI6	1923.01	2997.73	253.466	1942.92	2589.01	2987.29	932.797	477.517	965.917	1946.58	3486.2	1156.22	1482.12	1053.72	3372.35	1234.42	1239.94	624.345	691.022	120.668	370.392	432.216	2311.76	937.741	167.784	471.063	166.922	242.073	501.226	145.666	843.53	264.927	89.0794	342.808	0.432246	1.78635	10.1659	1.10936e-07	1.80392e-05
TNFSF10	317.135	480.531	74.9688	310.376	563.706	1885.86	286.925	102.076	183.334	513.685	485.554	621.395	265.999	336.18	905.807	487.336	1042.76	178.346	184.862	180.279	85.33	181.48	391.713	124.409	104.011	133.871	65.1425	142.494	302.973	157.647	294.666	195.816	161.977	195.69	0.315434	1.51313	8.47634	1.2096e-07	1.94259e-05
C3AR1	142.828	31.3782	214.746	71.7697	210.095	326.514	56.7268	193.706	38.1623	223.134	318.912	58.5545	29.4423	128.901	205.305	109.313	165.23	74.9533	16.2759	57.2754	37.8382	53.7375	50.6762	22.9887	88.6752	12.5728	39.6733	105.152	17.183	18.7421	60.7608	72.1221	41.816	47.9731	0.346904	1.60785	6.66774	1.25789e-07	1.99718e-05
OPTN	7.20405	11.6627	16.8886	17.7859	22.9329	13.8158	6.19542	18.2823	14.8265	29.055	16.0093	10.4894	4.35154	4.31374	30.6589	21.5986	33.9671	5.71452	13.8647	4.55979	5.10427	3.01115	12.3266	4.17976	5.9218	8.02267	6.66119	2.78672	9.72625	3.55862	5.57765	4.05768	6.72902	6.59631	0.168716	1.34899	3.76424	1.47529e-07	2.31603e-05
ATP10A	21.1423	11.2462	4.66839	35.196	36.9886	32.3905	11.81	11.9706	12.3769	20.9899	14.372	22.8376	21.4799	8.91995	28.8796	35.4632	20.4378	12.2264	7.43467	5.44951	5.77004	6.48556	16.2643	14.875	9.2623	8.3819	3.23264	4.08719	8.26731	11.269	5.22163	16.6234	3.36451	4.59743	0.161437	1.27718	4.06073	1.72532e-07	2.67847e-05
EIF2AK2	238.204	438.462	104.078	266.788	354.72	515.024	152.756	201.541	167.733	332.013	272.522	233.421	252.482	152.443	406.368	422.54	332.043	117.48	181.647	76.5155	99.3113	108.981	366.718	205.054	84.2718	123.334	120.587	55.9202	135.843	81.018	102.534	182.727	107.985	120.133	0.16777	1.08703	7.73532	1.76086e-07	2.70359e-05
EIF4B	154.73	229.922	386.652	82.792	96.9101	63.0923	187.799	257.476	278.481	188.082	115.34	109.541	160.822	264.089	115.245	235.51	202.507	300.61	576.086	360.335	240.899	288.492	260.572	293.443	512.464	246.308	689.433	436.4	210.898	364.759	313.179	424.224	513.488	395.379	0.160442	-1.05193	8.1703	2.13391e-07	3.24076e-05
SLAMF7	66.5592	71.3646	110.394	68.6384	76.9362	203.4	73.1834	33.0823	52.2152	69.6907	105.516	147.117	32.868	107.844	147.272	43.2915	211.287	29.2371	31.3462	21.3532	19.9732	12.2762	34.5831	14.6291	23.3835	48.136	7.73873	33.2548	150.919	18.8607	52.5723	31.6761	7.53009	18.9894	0.32781	1.54051	6.05734	2.26529e-07	3.37665e-05
IFI44	448.53	979.667	118.907	724.711	816.153	1285.49	359.915	532.799	199.836	405.323	534.674	702.389	680.97	258.313	794.806	966.09	471.077	190.44	316.677	74.0688	155.569	183.564	753.295	387.488	135.442	134.23	108.538	52.2045	339.77	88.4911	142.408	348.437	181.203	131.726	0.308809	1.46122	8.70086	2.27172e-07	3.37665e-05
STAP1	1.5661	2.91567	0	2.3798	11.6514	23.3334	0.58082	4.78823	4.64135	13.0282	0.909619	4.51441	2.40724	1.46229	20.1199	5.18744	0.86357	0.664479	0.401874	0.333643	0.110962	0.463254	4.10888	0.737604	0.759205	0.478966	0.685711	0	0.648417	0.830345	1.18673	0.916251	0.961288	0.199888	0.605966	2.7043	2.43429	2.67038e-07	3.92743e-05
HIST3H2BB	11.4325	5.55367	15.3782	18.5374	9.98691	55.7239	29.4282	52.6705	19.2101	36.4997	28.1982	12.6138	14.4434	41.4558	29.4271	7.35673	20.5817	7.30927	2.81312	9.45323	9.4318	3.35859	5.47851	12.6622	9.56599	9.33983	8.71832	12.4473	8.59152	9.7269	15.3089	17.6706	8.01073	6.59631	0.211035	1.35834	4.23647	2.95533e-07	4.30124e-05
EPHB2	39.1525	11.1073	9.74869	55.2364	49.0099	41.4475	13.1653	42.0058	16.7604	41.2561	38.7498	20.8459	25.7389	9.79732	51.8738	39.0473	28.066	17.808	7.0328	8.56351	14.0922	13.2027	25.8517	24.8327	9.71783	15.2072	6.66119	11.1469	5.51154	12.9297	9.49387	22.2518	12.0161	6.99608	0.182887	1.23828	4.61445	3.01394e-07	4.34131e-05
ATRN	18.9498	13.8842	26.3627	20.0404	14.2406	10.1316	18.199	15.0176	11.4745	11.0637	17.4647	17.7921	18.4246	13.9648	10.6759	20.0895	16.5518	22.7252	22.5049	31.8073	23.4131	24.7841	22.77	22.9887	23.3835	32.8091	25.0774	21.1791	21.722	30.7228	25.7521	29.9745	25.3139	25.5857	0.0198503	-0.666144	4.52952	3.06815e-07	4.37431e-05
AMFR	62.1741	58.73	80.1864	96.9455	37.7283	30.7019	56.9204	42.0058	72.0699	28.8482	45.299	63.8656	56.1997	43.4299	29.0165	62.3436	45.4813	78.4085	128.198	78.295	175.32	72.036	100.839	115.189	58.4588	164.405	102.759	59.2642	151.729	94.4221	54.1151	88.6146	68.7321	88.1506	0.108687	-0.888052	6.30368	3.40347e-07	4.80336e-05
MOV10	31.9484	25.6857	22.93	37.3253	52.5238	60.3292	37.1725	48.9705	12.5059	39.1881	32.2005	31.2025	21.6651	23.3966	61.7285	53.4778	59.0106	13.6883	18.2853	18.684	17.532	10.0758	25.5093	35.5279	19.5875	16.5243	10.9714	12.8189	15.562	14.4717	19.5811	36.7809	23.2311	12.3931	0.118049	1.00353	4.95237	3.48646e-07	4.87128e-05
EIF3L	236.168	247.416	319.235	136.4	120.768	75.2196	228.262	260.741	451.501	171.435	165.005	187.879	262.481	269.865	112.918	201.65	187.251	379.816	538.511	340.094	320.015	382.532	357.644	270.824	372.314	409.995	446.985	431.198	285.628	480.177	362.31	319.51	359.201	325.618	0.103688	-0.825392	8.23138	4.20003e-07	5.81019e-05
APOL6	157.08	215.482	49.2927	145.042	285.737	212.457	178.118	144.082	148.008	193.976	173.373	161.324	108.233	134.384	322.056	247.865	241.224	107.513	195.11	55.2736	90.5453	66.7086	166.923	111.378	63.7732	99.5051	66.8078	62.2367	89.9678	70.9352	116.181	106.94	86.9966	70.7604	0.128942	0.931388	7.1595	4.28372e-07	5.86786e-05
NMI	84.8825	103.021	96.6631	94.8162	155.352	253.29	80.1532	77.2646	87.1543	167.196	161.184	74.8861	64.7176	142.5	265.391	144.116	196.606	67.5111	69.7252	61.9465	50.4879	64.8556	83.0336	68.2284	42.2118	57.4759	64.6527	75.2414	57.547	53.1421	114.401	79.4521	70.4944	94.547	0.124614	0.925151	6.70196	4.41263e-07	5.9282e-05
BST2	550.953	636.728	218.453	303.738	467.351	608.664	351.59	398.511	475.481	643.553	611.628	358.63	367.381	373.541	748.68	569.864	755.623	305.926	338.579	217.98	179.093	282.353	533.47	257.547	238.998	236.848	238.725	227.582	227.432	202.248	426.631	302.886	196.423	335.212	0.103697	0.820893	8.62335	4.38514e-07	5.9282e-05
ETV7	1.09627	2.08262	0.549222	1.62828	14.6105	7.06143	1.74246	1.74117	0.644633	13.1316	3.8204	3.85052	1.48138	2.85146	5.33794	4.4329	17.8471	0.265792	0.602811	0.333643	0	0.463254	3.25286	1.22934	0.759205	0.119741	0.587752	0.185781	1.13473	0.237241	1.54275	1.04714	0.320429	1.5991	0.447077	2.44151	2.30166	4.67211e-07	6.21702e-05
IFI16	371.635	710.036	176.712	363.483	575.912	851.977	447.812	168.023	422.621	784.796	283.619	541.729	440.339	413.388	745.122	530.345	487.629	275.094	368.318	297.832	119.174	303.779	447.183	184.647	261.47	226.191	215.215	202.687	241.211	264.287	304.279	235.738	187.131	214.08	0.132571	0.924545	8.56326	4.82244e-07	6.35653e-05
PARP3	11.1193	7.08092	5.21761	13.2768	22.1931	17.3466	8.32509	13.7117	12.6348	15.7166	11.825	15.9332	8.42532	11.9907	14.0976	10.5635	17.8471	6.91058	5.82717	5.78315	7.32351	5.44324	6.50573	6.39257	5.9218	7.90293	6.07344	6.68813	7.45679	7.23586	7.83244	7.72269	7.36987	7.39586	0.0191187	0.883544	3.57657	4.87938e-07	6.37147e-05
MICAL2	31.7918	20.132	74.2823	34.695	12.946	5.67984	21.8776	19.1529	20.3704	22.8511	18.5562	19.9165	30.2756	16.8894	20.2568	60.6459	28.066	45.4504	33.3555	80.408	63.9143	38.6817	31.6726	55.1974	43.1229	59.272	79.2486	45.1448	38.7429	57.2938	43.5531	84.8187	123.526	84.1529	0.183998	-1.14926	5.522	5.16461e-07	6.68147e-05
ODF3B	96.6282	80.2505	70.7123	162.453	201.403	96.7109	98.9331	56.3705	47.1871	139.795	181.924	129.059	79.9017	78.013	53.2425	48.8562	185.236	48.507	45.8136	46.3764	57.8114	34.6282	81.4928	80.153	26.1167	45.2622	51.4283	36.4131	56.4122	27.2828	61.5915	14.66	12.4967	87.1512	0.191298	1.14024	6.31899	5.22813e-07	6.7016e-05
KCTD20	29.4426	43.4574	60.5517	30.5616	23.3028	17.9606	26.5241	32.647	46.9293	23.3681	30.927	36.7791	39.6268	24.5664	25.1841	44.5177	39.5803	36.2806	76.1551	77.4053	47.3809	42.5036	73.6174	55.3203	31.8866	87.531	74.8404	36.7847	53.0081	82.56	36.6701	70.4205	57.0364	73.5588	0.0866448	-0.825549	5.62621	5.3094e-07	6.7439e-05
TYMP	1902.03	1564.88	703.279	2012.68	2570.34	1138.58	1469.67	984.852	1397.31	1897.26	1777.39	1610.98	1410.73	1067.62	2404.67	1816.64	2350.64	1204.04	1189.35	556.183	863.842	697.429	1573.02	1160.87	472.226	1033.73	721.368	687.205	945.391	594.527	1143.89	1078.56	670.979	1109.18	0.110001	0.831508	10.3473	5.42894e-07	6.83362e-05
CCL8	0.939659	7.77513	0.961138	0.50101	6.84289	31.3159	0.387214	0.65294	0.644633	1.65438	2.36501	3.31942	0.833274	0.219343	13.8239	4.9988	8.6357	0.531583	0.401874	0.444858	0.110962	0.579068	1.88324	0.368802	0.151841	0.598707	0	0.185781	0	0.118621	1.42408	0.654465	0.320429	0.799552	0.796212	3.02137	2.27049	5.89958e-07	7.29459e-05
C15orf48	5.95117	8.46934	41.3289	3.88283	8.50737	5.83335	3.67853	177.817	8.89593	9.92627	3.63847	3.05386	3.24051	1.5354	5.47481	4.14995	2.30285	4.91715	4.62155	0.333643	3.55079	3.35859	2.56805	5.65496	5.61812	1.91586	0.979587	3.52984	1.78315	0.830345	1.18673	0.523572	1.1215	0.399776	0.931405	2.73062	3.60005	5.86044e-07	7.29459e-05
JUP	93.3394	77.6125	40.917	160.073	137.967	166.251	39.3022	21.7647	88.7014	128.731	81.138	90.6865	74.9021	63.975	40.103	24.8054	87.0766	46.7793	39.3837	22.799	57.4785	20.0357	72.2478	47.4525	29.4572	59.3917	27.1346	24.5231	40.0397	34.9931	19.3438	8.50805	5.4473	15.7912	0.253508	1.30385	5.92705	6.78632e-07	8.31741e-05
NR1H3	4.69829	1.52726	2.74611	9.01819	8.32243	24.408	7.16345	11.3176	7.86452	11.4773	15.0997	15.0038	3.05534	6.79963	12.3183	9.80897	13.961	4.25267	1.80843	3.114	4.21657	2.77953	4.10888	3.44215	2.88498	3.35276	1.86121	2.78672	8.42942	3.44	3.5602	3.665	6.08816	3.59798	0.125352	1.3362	3.13738	6.93615e-07	8.42712e-05
IDO1	1.09627	2.49915	0.274611	1.87879	7.58266	7.67547	1.54885	1.52353	1.54712	3.10196	3.45655	2.38998	2.22206	0.292457	8.34909	6.79083	11.2264	0.797375	1.00469	0.444858	0.443849	0.347441	1.54083	0.983472	0.455523	0.718448	0.293876	0.928906	1.94525	0.355862	1.18673	0.130893	0.480644	0.199888	0.244364	2.18158	2.09607	7.52883e-07	9.06834e-05
H1F0	79.871	50.6772	119.044	266.036	185.128	268.948	89.6399	520.611	149.813	420.729	289.441	37.0447	93.8822	188.854	240.892	152.133	109.673	46.6464	46.4165	44.3746	90.7672	29.8799	115.22	69.5806	166.873	33.2881	53.2895	133.205	27.7198	66.6648	103.008	63.0904	81.7095	69.561	0.299954	1.38354	7.09095	7.76236e-07	9.26972e-05
DTX3L	142.045	190.63	75.3807	163.204	205.841	145.987	104.16	97.941	163.866	194.493	175.556	167.299	134.898	160.047	286.88	235.321	187.395	106.45	129.203	84.3006	66.0226	73.0783	155.453	113.468	83.2089	111	84.3424	73.5694	84.1321	68.2069	132.202	122.385	82.3503	95.5465	0.0873402	0.756954	7.08593	8.01154e-07	9.48621e-05
DEFB1	1.40949	0.971892	0.137305	0.50101	5.91817	16.1185	1.16164	9.7941	1.16034	2.89516	8.91426	0.531107	0.648102	0.658029	9.99153	2.73519	2.30285	0.531583	0.200937	0.222429	0.332887	0.926508	1.19842	1.35227	0	0.359224	0.195917	0.371563	0.324208	0	0.949387	0.392679	0	0.399776	0.567103	2.76993	2.07366	9.13485e-07	0.000107254
MT2A	78.1483	71.0869	50.6657	86.5495	141.666	188.049	177.344	37.2176	66.3972	142.483	431.523	94.1387	119.714	83.789	26.416	19.7123	91.5384	40.6661	32.1499	32.2522	33.8435	17.0246	65.7421	43.8874	31.8866	50.0519	60.6364	63.5372	71.3258	32.6207	18.7504	2.61786	12.3365	52.9703	0.356155	1.51333	6.28864	9.32738e-07	0.000108602
PSMB9	37.743	71.2258	26.2253	41.0828	62.8806	91.031	42.5935	61.594	57.7591	76.7218	93.3269	58.0234	46.9411	59.2226	97.8622	54.2323	76.7138	28.1739	47.823	24.2448	21.3048	32.5436	60.9484	20.53	23.0798	40.8318	21.1591	43.4728	42.3092	25.6221	58.2686	34.8175	20.6677	30.1831	0.10326	0.862789	5.65901	9.5259e-07	0.000109997
KMO	23.4915	31.6559	16.0647	21.4182	30.1457	92.5661	18.7799	10.8823	20.6282	24.5055	26.197	35.3186	21.3874	36.5572	48.8627	26.2201	27.7782	13.0238	16.075	13.0121	9.54276	17.9511	25.1669	11.187	8.65494	11.4952	7.54282	10.218	19.4525	14.709	22.7853	21.7282	10.7344	8.59519	0.139832	1.06381	4.60989	9.91876e-07	0.000113594
PARP12	82.5334	151.476	39.9559	137.277	86.5533	191.426	60.7925	51.147	48.3474	60.178	86.5957	78.471	66.9397	55.2013	94.1667	121.858	100.894	47.178	84.3936	31.5849	45.2726	30.8064	100.325	58.3937	27.7869	48.0163	22.6285	22.6653	50.9007	30.1297	40.2303	40.0533	42.7773	34.7805	0.147515	0.988444	6.11547	1.00038e-06	0.000113637
C19orf66	101.64	153.975	54.5103	127.006	110.596	117.742	94.6737	159.753	73.617	117.771	139.535	78.6038	99.067	87.5909	182.448	134.873	140.906	69.9032	92.8329	57.4979	93.8741	56.1696	95.8739	97.9784	50.4112	71.7251	56.6201	56.8491	71.65	43.5338	74.2895	72.6456	57.5171	74.5582	0.0761209	0.716689	6.58841	1.01584e-06	0.000114462
IGJ	2.19254	1.11073	1.78497	3.25657	3.51391	5.67984	0.387214	24.8117	2.96531	6.30732	19.102	12.8793	3.88861	1.09671	6.29603	0.754536	14.8246	0	0.401874	0.556072	0.443849	0.115814	0.171203	0.122934	0.911046	5.02914	1.86121	3.71563	0.486312	0.118621	2.13612	0	0.640859	0.599664	0.629285	2.52439	2.54496	1.03767e-06	0.000115987
NAPA	325.748	424.994	218.178	234.723	394.668	365.659	256.335	540.852	255.79	443.787	365.485	206.999	265.444	264.893	572.118	496.674	543.041	256.622	264.433	150.251	180.425	192.482	262.455	269.471	217.285	174.224	219.134	203.059	159.186	137.6	235.329	249.351	258.106	243.863	0.0899232	0.740125	8.2065	1.144e-06	0.000126857
PLSCR1	297.089	359.183	162.57	306.493	372.66	924.126	175.408	422.888	166.315	481.321	613.265	290.383	291.368	355.409	719.664	441.215	559.593	213.165	194.909	144.356	139.923	142.451	289.676	212.676	109.933	142.133	172.211	170.176	239.104	95.1338	298.582	190.188	208.599	426.761	0.173383	1.0225	8.27366	1.17239e-06	0.000128982
BTN3A1	38.8392	46.0954	14.2798	26.8041	43.8315	63.7064	51.3058	22.8529	32.4895	37.5337	60.9444	43.1524	27.0351	31.2198	37.3656	36.595	37.9971	28.3068	28.734	21.3532	12.3168	20.2674	23.6261	26.6767	27.4832	18.081	19.1999	24.8947	25.7746	24.3172	26.4642	18.4559	22.9107	16.7906	0.060136	0.740749	5.03739	1.20507e-06	0.000131541
NM_005138-T17263	27.8765	20.9651	6.04144	38.202	56.7775	19.9562	29.041	5.87646	14.1819	25.2293	37.1124	27.4848	25.8315	12.2832	24.4998	12.5442	26.4828	14.6185	13.0609	7.11772	11.651	8.10695	18.3188	21.8823	2.73314	15.3269	5.58364	5.20188	9.56415	7.47311	13.1727	5.23572	1.44193	10.5941	0.198275	1.243	4.26754	1.25314e-06	0.000135728
OAS3	523.233	314.06	88.562	596.829	641.752	679.125	120.811	297.523	180.368	341.733	296.172	388.239	288.313	218.612	583.341	742.464	782.106	202.267	167.581	54.1614	157.012	115.582	426.468	259.76	80.6276	200.208	63.8691	45.888	220.786	67.8511	173.263	295.164	111.509	188.295	0.288906	1.3208	8.21053	1.26329e-06	0.000135775
CCR1	191.847	139.814	6.31605	76.4041	286.107	207.084	73.377	151.482	193.519	115.29	90.4161	127.598	81.846	46.3545	92.6612	35.0859	51.9581	114.29	47.0193	11.2327	35.1751	45.2831	52.217	54.4598	70.4543	48.8545	9.20811	21.5506	44.7407	31.6717	49.4868	24.7388	10.2537	38.9782	0.340736	1.45541	6.33873	1.38762e-06	0.000147999
GPR18	10.4929	9.44123	22.1062	4.7596	6.28806	49.123	8.32509	4.57058	2.83638	10.8569	8.91426	7.70105	4.07378	6.43406	18.4775	3.58405	2.44678	5.58163	5.62624	1.66822	4.21657	3.01115	3.25286	4.42562	5.46628	4.19095	1.56734	2.22938	2.91787	2.49104	3.5602	1.70161	2.72365	1.5991	0.291158	1.63182	3.17651	1.43444e-06	0.000151833
KIAA1958	14.4081	16.9387	4.66839	13.6525	23.4877	12.5878	9.87394	12.8412	13.0216	20.9899	14.1901	10.7549	11.1103	7.53077	18.7512	23.6736	12.3778	6.64479	13.0609	2.89158	6.10293	5.21161	12.4978	12.2934	4.25155	7.78319	6.95507	5.945	6.80837	3.44	2.61081	10.2097	6.88923	6.39642	0.0708404	0.983342	3.67234	1.50689e-06	0.000158303
BLVRA	390.428	521.489	186.873	379.766	478.447	435.813	284.989	425.935	322.832	516.89	654.38	251.479	302.478	349.633	548.439	411.977	642.928	285.327	349.028	169.602	191.743	241.587	410.888	265.292	172.491	187.515	191.607	274.77	200.199	177.338	301.549	219.9	198.346	342.008	0.0973569	0.75841	8.39966	1.52961e-06	0.000159491
FAM225A	3.44542	4.72062	0.549222	13.2768	19.0491	17.8071	6.96984	2.82941	3.09424	6.30732	3.8204	10.3566	4.90706	1.90097	10.2653	11.6953	11.8021	1.72765	2.21031	0.889716	4.66042	1.96883	9.75859	2.70455	1.82209	2.39483	0.489793	0.743125	3.07998	0.948966	0.949387	1.57072	2.24301	1.79899	0.266158	1.67203	2.83778	2.07622e-06	0.000214881
MYOF	94.1225	42.4855	78.5387	61.2485	103.568	75.3731	48.7889	113.829	99.5313	111.05	178.103	64.1311	44.3487	113.693	179.574	66.2106	113.991	47.0451	49.2296	51.9371	30.7366	56.0538	36.8087	25.5703	73.4911	53.0454	19.3958	57.5922	31.7724	46.8552	82.478	74.609	24.9935	49.1725	0.148687	0.958575	6.20113	2.09222e-06	0.000214945
AEN	19.8894	16.5222	5.21761	8.26667	21.2684	31.6229	10.4548	23.0706	11.6034	18.3016	8.00464	13.676	9.62894	7.53077	14.9189	16.4112	14.5368	15.6817	5.02343	4.67101	7.43448	8.45439	7.36174	5.53203	8.04758	6.34629	9.99178	6.87391	5.83575	4.62621	4.62826	7.33001	7.04944	8.19541	0.0813253	1.00056	3.71481	2.13681e-06	0.000216344
ADCK3	36.6467	46.0954	33.6398	37.701	31.4403	21.7983	43.3679	24.3764	32.1027	29.2618	19.4658	34.2564	45.5523	31.2929	21.4886	47.2528	25.6192	56.082	69.1223	56.1633	65.0239	41.3454	53.4154	52.7387	52.9925	57.8351	61.714	27.4956	53.0081	51.2442	34.89	53.2735	67.6106	30.383	0.0562421	-0.666441	5.49403	2.1234e-06	0.000216344
ITGAE	5.16812	13.4676	5.0803	6.38788	5.54829	8.2895	11.81	3.69999	7.99344	3.82575	3.45655	9.82548	15.1841	6.28783	4.37985	3.48973	4.89356	12.0935	23.9115	9.34201	7.6564	21.5413	16.9491	12.7851	10.3252	11.3754	15.9673	13.562	19.1283	17.9117	11.5113	7.33001	11.8559	8.3953	0.0658853	-0.963495	3.63623	2.29543e-06	0.000230732
BLNK	3.75864	2.22147	2.33419	7.51515	17.1997	13.5088	5.6146	8.48822	6.70418	19.9559	8.00464	6.63883	2.77758	4.53309	26.8266	5.28176	9.78712	2.12633	2.21031	2.55793	2.77406	3.59022	2.73925	1.96694	4.55523	2.63431	3.03672	6.50234	1.62104	1.66069	5.69632	4.31947	2.24301	1.99888	0.209554	1.48415	3.01466	2.77702e-06	0.000277147
MSL1	42.4413	55.259	72.6346	49.4748	50.4894	22.8729	42.0127	41.1352	46.6714	39.7051	58.0337	43.0196	42.1266	38.6775	40.7873	60.5516	43.0346	57.6768	86.6039	73.2903	66.3555	48.4101	66.2557	84.7015	46.3115	72.5633	90.7097	68.5533	63.5448	67.258	56.4885	78.9285	86.9966	70.9603	0.0491304	-0.599438	5.92866	2.98172e-06	0.000295466
HIST1H3G	0.626439	0.138842	0.823833	1.12727	0.184943	1.6886	0.774427	18.2823	0.902486	5.68693	21.2851	1.06221	0.648102	0.804257	5.33794	0.471585	5.46927	0	0	0.333643	0.665774	0	0.171203	0.122934	0.911046	0.239483	0.293876	1.30047	0	0	0.949387	0.130893	0.320429	0.799552	0.919183	3.00408	2.05492	3.03873e-06	0.000298288
TRIM22	274.85	595.075	145.818	288.457	347.693	547.568	316.547	269.229	157.161	347.523	368.941	372.173	350.253	219.708	416.359	514.971	453.086	180.207	319.691	172.938	133.599	177.426	347.029	228.903	186.613	116.508	171.526	118.714	253.855	201.537	161.396	253.409	222.538	171.904	0.114396	0.798992	8.13581	3.05291e-06	0.000298288
WLS	17.0705	21.937	23.3419	10.897	14.0557	3.83773	9.68034	11.9706	16.3737	11.5807	12.9166	17.3937	15.3693	5.92226	11.3602	12.9214	6.47677	28.041	38.7808	26.0242	20.639	28.9534	19.5172	23.1116	16.5507	18.2007	28.7019	21.3648	17.5072	23.9614	12.8167	19.5031	21.4688	17.5901	0.0570487	-0.786191	4.32571	3.28821e-06	0.000319047
DHX58	42.5979	27.9072	15.3782	53.6081	48.8249	44.5177	17.0374	30.6882	16.6315	50.045	40.3871	14.6054	30.4608	28.0028	70.625	74.6991	86.7887	22.5923	15.874	14.1242	17.0882	13.666	21.4004	26.9225	14.5767	16.6441	15.9673	11.5184	10.861	13.6414	17.5637	39.3988	20.5075	36.1797	0.173289	1.06367	5.0218	3.41108e-06	0.000328687
TMEM70	18.1667	24.7138	8.92486	28.9333	17.1997	21.7983	17.8118	25.4647	24.496	31.5366	23.1043	22.7048	63.6066	24.7858	15.3295	23.3906	31.6642	38.0082	78.5664	35.1438	98.4236	26.2897	40.404	13.1539	24.7501	106.57	162.024	22.6653	85.591	41.6359	38.0942	33.6395	51.7493	54.7693	0.228974	-1.17683	5.42795	3.47711e-06	0.000332754
VRK2	111.819	170.914	88.2874	121.996	147.215	171.623	124.683	126.888	189.78	163.163	127.892	161.456	135.731	144.401	230.079	167.507	130.975	91.1665	132.418	67.5072	73.568	94.1564	150.145	88.6354	70.7579	117.706	88.7506	81.9295	144.273	76.629	102.415	93.0649	88.1181	74.3584	0.0625632	0.611836	6.96951	3.65144e-06	0.000347061
RTP4	11.2759	9.30239	5.62952	15.2808	15.3503	68.1581	9.68034	8.92352	8.50915	14.9928	21.467	18.7215	8.6105	17.4743	25.321	19.4293	30.3689	4.25267	6.02811	8.11866	3.88368	3.59022	10.4434	4.67149	2.88498	8.3819	4.5061	5.01609	17.0209	7.47311	13.0541	12.4348	3.84515	7.99552	0.227331	1.29222	3.89342	4.10036e-06	0.000385578
PARP14	123.722	202.987	146.917	130.137	229.144	215.374	102.224	216.341	88.0568	135.039	106.789	107.549	133.416	81.1569	346.419	314.642	171.563	71.8966	151.105	86.6361	55.0373	74.3523	130.799	137.809	59.9772	98.3077	66.7099	55.3628	73.7574	54.0911	78.2058	155.632	100.455	65.7632	0.146093	0.90197	7.044	4.11188e-06	0.000385578
CTDSP2	48.7056	37.2096	57.3937	61.499	45.1261	22.4124	40.2702	23.9411	40.9986	24.9191	25.4693	31.3353	43.3302	28.6608	26.5528	58.2879	45.6253	54.3544	76.9589	75.4034	82.445	41.5771	74.8159	73.0228	45.856	90.4048	69.4527	33.6264	67.2732	91.4566	31.6858	70.6822	56.5558	62.3651	0.0841162	-0.739405	5.76564	4.21315e-06	0.00039244
GIMAP5	6.10778	8.88587	0.686527	15.5313	21.2684	41.908	17.4246	3.04705	3.22316	8.68549	10.7335	30.1403	15.2767	5.84914	13.5502	7.92263	17.1275	4.38556	2.41124	5.78315	3.32887	4.97998	8.73137	3.56509	1.97393	1.91586	1.56734	2.41516	7.13258	11.1503	4.86561	5.10483	2.40322	6.99608	0.289407	1.48789	3.47152	4.48201e-06	0.000414719
IRF9	72.5103	67.477	43.3885	82.2909	72.3127	148.443	81.3148	109.694	44.8664	71.8621	80.9561	85.5082	87.6789	71.3596	76.3736	83.8479	75.9941	53.8228	45.8136	45.9316	51.0427	46.0938	69.3374	62.6963	39.9342	50.7704	37.4202	32.1402	71.4879	44.6014	52.2163	58.9019	59.4396	49.7721	0.0595095	0.624253	6.0912	4.68231e-06	0.000430403
ARRDC3	136.094	129.956	154.881	82.4162	109.301	229.189	139.784	470.117	192.358	261.082	162.822	68.9111	94.3451	220.074	227.205	92.1478	76.7138	96.0837	51.8418	73.5128	73.3461	88.5974	66.5981	83.2263	163.988	51.4888	56.914	135.435	53.6565	56.2262	108.586	101.18	79.7869	91.3488	0.175782	0.977191	7.01656	5.14964e-06	0.000470267
GBP4	131.239	165.499	45.5854	97.9475	190.306	248.225	139.978	60.5058	84.0601	105.57	54.2133	133.175	85.1791	70.6284	156.443	197.877	207.257	79.6046	165.371	26.5803	37.5053	36.9445	142.27	64.0486	38.5676	67.5341	21.0611	17.2777	70.1911	50.1766	39.7556	59.0328	34.2859	27.5846	0.242811	1.1507	6.57418	5.24226e-06	0.000475616
CMKLR1	4.8549	1.80494	0.961138	8.39192	22.1931	16.1185	2.51689	1.08823	1.16034	5.68693	11.2793	3.18664	0.833274	2.92457	15.1926	4.4329	6.76463	3.3224	1.40656	1.77943	2.44117	2.20046	1.54083	2.08988	0.911046	0.718448	1.46938	1.48625	1.94525	0.948966	1.7801	1.70161	2.88386	1.5991	0.334168	1.77207	2.62587	5.7434e-06	0.000517721
CCR5	12.2156	2.22147	2.4715	13.5273	9.98691	28.0922	6.38902	31.7764	7.34881	9.40928	21.1032	10.3566	9.35118	15.354	11.4971	5.37607	17.4153	6.5119	1.80843	4.67101	1.99732	2.20046	3.59527	4.67149	10.477	2.87379	0.979587	6.50234	4.21471	5.81242	11.986	2.87965	2.08279	8.19541	0.236383	1.35515	3.43375	7.21694e-06	0.000646379
P2RY6	0.15661	0	0.137305	2.12929	4.80851	3.83773	0.58082	1.30588	0.38678	2.79176	3.27463	0.39833	0.185172	0.5118	5.74855	0.377268	1.72714	0.132896	0	0	0.110962	0.115814	0.342407	0.245868	0	0.239483	0	0.371563	0.162104	0.118621	0	0.130893	0.160215	0	0.275021	2.83302	1.55105	7.42125e-06	0.000660444
STARD4	39.7789	31.3782	20.0466	17.9111	39.5778	27.9387	26.3305	161.929	27.0746	26.6769	17.2828	18.3232	25.5537	12.7219	21.3518	16.4112	11.946	23.9213	13.6637	8.4523	16.2005	20.3832	9.41618	19.6694	18.2209	20.5955	11.755	7.43125	10.3747	10.4386	8.54448	4.45036	12.657	10.1943	0.254662	1.23866	4.63222	7.55524e-06	0.000668113
BLZF1	19.5762	49.5665	10.1606	24.6748	44.9411	100.395	33.1068	18.0647	22.0464	34.0182	28.562	43.8163	35.4604	28.9533	38.8712	26.9747	22.7407	17.5423	25.3181	19.5737	10.9853	18.8776	23.9685	15.3668	24.4464	12.8123	17.4366	13.0047	23.8293	21.9448	17.5637	17.0161	16.1817	14.1921	0.119084	0.887655	4.8317	8.14586e-06	0.000712746
PLXND1	51.9945	34.155	70.575	71.1435	47.3454	17.8071	57.114	33.9529	51.6995	36.1895	48.2098	52.8451	59.6254	46.4276	25.0473	31.5962	46.057	59.8031	68.7205	78.6286	80.3367	56.2854	54.6139	89.1272	52.2333	105.851	85.0281	83.9731	99.6941	90.5076	86.9876	53.797	32.5236	94.3472	0.0862475	-0.714	5.98167	8.162e-06	0.000712746
TMEM123	702.552	946.9	290.264	543.847	819.852	1112.48	498.15	664.476	565.987	620.392	548.318	490.743	592.55	425.745	789.878	629	526.49	442.277	581.713	180.501	422.101	443.103	834.274	495.67	221.384	412.629	276.439	271.241	354.846	252.544	323.741	260.215	222.538	262.653	0.120327	0.776514	8.98331	8.32227e-06	0.000722228
HAPLN3	1.72271	4.58177	1.23575	12.901	13.5008	5.67984	9.87394	9.14116	4.25458	8.89229	7.27695	10.8877	2.87017	2.41277	25.0473	33.6712	37.9971	2.79081	1.20562	0.778501	4.43849	1.27395	9.24498	2.58161	0.607364	4.55017	1.76326	0.928906	10.2126	2.01655	1.7801	2.87965	5.28708	2.99832	0.457161	1.76184	3.23124	8.39066e-06	0.000723668
NM_001160417-T21322	1.5661	2.49915	0.411916	1.75354	3.69886	7.06143	0.387214	2.39411	0.773559	2.58497	3.0927	1.7261	1.11103	1.31606	6.4329	4.90449	4.17392	0.797375	0.602811	0.111214	0.776736	0	2.22564	0.491736	0.303682	0.598707	0.293876	0.371563	0.810521	0.237241	0.474694	1.43982	0.961288	0.199888	0.0647079	1.89437	1.89004	9.37845e-06	0.0008039
LDLRAD4	11.9023	6.24787	11.8083	9.39394	3.32897	3.2237	9.48673	8.70587	10.572	2.99856	8.00464	9.29437	10.277	8.84683	5.20107	7.92263	5.46927	13.5554	6.83186	13.5682	15.0909	9.03346	14.7235	11.6787	18.5246	21.6732	14.0081	14.8625	16.0483	20.1655	9.49387	12.5657	11.0548	7.59575	0.0353162	-0.799436	3.68171	9.95134e-06	0.000847806
PNPT1	39.1525	80.5282	21.0077	47.3455	37.3585	95.9433	26.5241	43.747	22.3043	50.4585	40.7509	38.3725	43.608	26.4674	61.7285	75.7366	50.3749	23.3897	28.1312	23.5775	26.7419	28.0269	55.9835	35.0362	22.6243	23.1101	19.004	16.3488	21.2356	16.251	24.8027	34.294	25.6343	24.3863	0.111942	0.82357	5.29143	1.01891e-05	0.000855271
DNAJA1	208.604	359.878	402.03	290.586	315.512	352.611	333.197	242.894	294.339	283.106	300.902	235.28	257.667	290.922	395.555	249.563	342.981	251.572	350.032	157.813	189.857	210.781	225.475	220.052	233.532	186.078	135.869	213.463	166.643	206.4	250.994	178.145	177.197	192.892	0.0547804	0.530608	8.02631	1.02226e-05	0.000855271
TGFBR1	39.7789	41.3748	45.86	28.5576	31.9951	35.3071	30.9771	72.4764	40.9986	32.157	33.474	30.937	33.1458	35.4604	31.617	55.1755	29.7932	60.4676	64.2999	55.1624	47.6028	59.5282	64.7149	52.0011	62.2548	60.2299	67.1996	42.9155	39.0671	56.1076	53.5217	63.2213	50.9483	48.3729	0.0430739	-0.557197	5.63241	1.01317e-05	0.000855271
SP110	33.2013	42.4855	14.0052	36.0727	48.0851	45.2852	22.652	8.92352	28.106	40.2221	38.9317	32.9286	27.498	28.3684	53.5163	50.8369	44.4738	21.3962	22.7059	23.1326	12.2059	16.3297	27.3925	17.0878	19.2838	23.1101	14.4979	18.5781	20.7493	16.0138	25.6334	28.0111	19.386	23.9866	0.0814166	0.753787	4.91424	1.04044e-05	0.000865299
FAM70A	6.421	2.49915	0.823833	2.00404	11.4665	15.3509	1.16164	1.52353	1.67604	4.65294	7.09503	2.38998	0.92586	0.438686	6.15916	2.54656	2.015	2.39213	0.200937	1.11214	0	1.38976	2.05444	2.21281	0.911046	0.957931	0.783669	1.67203	0.810521	0	0.35602	0.785358	0	0	0.335859	1.98952	2.1824	1.09507e-05	0.000894759
HELZ2	21.1423	15.9668	17.1632	26.303	30.5156	15.6579	8.7123	21.3294	10.8298	11.9942	20.9212	19.651	13.5176	15.8658	44.0722	37.5382	23.6042	13.1567	7.83654	7.78501	13.6484	4.51673	9.24498	15.8585	4.40339	16.0453	7.64078	11.5184	11.5094	4.74483	16.9703	18.5868	7.04944	12.1932	0.116042	0.939683	4.17217	1.08746e-05	0.000894759
ZDHHC7	120.276	102.882	105.313	111.6	74.532	68.0046	108.807	89.8881	131.376	86.8549	74.7707	72.6289	99.1596	109.598	73.9099	123.744	94.7048	160.272	222.236	111.326	133.377	110.949	157.165	173.214	135.898	129.44	172.701	104.409	113.959	175.677	111.79	129.322	133.299	119.533	0.0545518	-0.548293	6.93489	1.09304e-05	0.000894759
CBWD2	57.1626	95.2454	28.9715	36.5738	52.3388	69.6932	49.7569	46.7941	40.9986	61.5222	49.6652	38.638	36.3863	29.7575	68.7089	49.988	56.9956	38.5398	53.8511	26.9139	21.4157	40.5347	44.5129	33.561	30.3682	30.2946	27.2325	23.0369	24.1535	28.9435	35.4833	34.9484	22.2698	28.1842	0.0679244	0.661706	5.45948	1.22759e-05	0.000997199
RASL11A	8.14371	12.6346	13.5932	5.26061	3.51391	4.45177	8.13148	2.61176	5.80169	2.58497	9.46003	7.16994	9.53636	10.4553	3.28489	5.37607	6.76463	9.83429	13.8647	13.6794	12.2059	14.1293	8.90257	14.2603	12.6028	10.0583	9.11016	23.78	9.56415	12.2179	12.5794	7.19912	14.7397	13.3925	0.0439305	-0.838692	3.57088	1.27995e-05	0.00103373
DDB1	91.1469	75.9464	123.438	66.7596	54.0033	35.3071	53.0483	41.5705	80.0634	47.977	52.576	77.0105	85.9198	62.5858	48.0415	92.2421	60.8817	102.861	115.539	157.368	86.6616	89.6397	104.605	74.498	76.6797	145.246	120.783	74.1267	92.5615	139.735	86.9876	124.872	98.3718	104.541	0.0810832	-0.657843	6.48879	1.38137e-05	0.00110872
HTRA1	0.939659	0.555367	2.88342	0.751515	1.10966	0.460528	2.71049	0.217647	0.257853	0.620392	0	1.46054	0.46293	0.219343	0.13687	0.943171	0.431785	2.92371	1.40656	5.44951	0.998661	3.12697	4.9649	2.82748	0.455523	0.957931	3.03672	2.41516	6.48417	3.67724	0.474694	3.14143	2.88386	3.99776	0.0127136	-1.6682	1.96712	1.38868e-05	0.00110872
APOL3	108.061	95.9396	441.986	190.885	172.552	147.522	146.754	48.9705	96.8238	94.7132	107.517	140.478	91.1046	103.53	214.613	231.643	284.834	94.6218	92.2301	114.773	106.413	64.3923	97.2435	78.8007	76.9834	107.648	59.7548	46.2595	97.2625	94.778	67.0505	123.17	82.0299	57.7676	0.159929	0.8881	6.98298	1.42443e-05	0.00113081
STOM	115.735	129.678	62.1994	114.356	204.177	177.61	140.365	142.776	162.061	172.572	163.186	107.018	102.678	121.224	217.761	140.815	206.825	84.1231	157.736	56.8306	66.5774	100.179	147.748	87.2831	78.9573	107.169	72.3915	80.0717	86.4015	80.069	119.979	73.431	70.8149	94.7469	0.0845449	0.657047	6.93379	1.4572e-05	0.00115028
STAT1	545.002	817.916	424.823	743.499	871.821	702.305	607.925	633.57	675.704	950.234	588.159	770.37	580.884	416.167	1229.64	1373.16	1116.88	391.511	759.542	259.575	394.915	297.988	829.48	487.065	243.705	592.84	424.651	173.334	560.07	311.973	354.359	643.732	426.972	332.214	0.136208	0.798884	9.25866	1.58288e-05	0.00124247
SORL1	70.1612	43.874	216.393	80.4122	39.3928	42.6756	56.146	99.8999	48.6053	40.1187	56.7602	57.3595	50.3668	57.8334	47.7677	124.31	74.9866	73.6243	84.9964	198.407	159.12	68.2142	64.5437	142.972	90.1936	164.525	144.587	122.058	122.875	115.299	109.536	200.921	194.821	201.687	0.172817	-0.918303	6.72481	1.6908e-05	0.00131977
KCTD14	0	0	0	3.50707	3.8838	2.30264	0	0	0.128927	1.24078	7.6408	2.2572	0	0.0731143	1.09496	0	0.575713	0	0	0	0	0	0	0	0	0	0	0	0	0	0	0	0.160215	0	0.897037	3.43363	1.43454	1.74113e-05	0.00133666
HEG1	41.1884	19.8544	38.7201	32.3152	41.7971	60.9432	22.652	57.2411	44.2218	28.9516	38.5678	32.2647	20.9244	62.5858	58.7173	41.2166	37.8531	22.4594	17.0796	15.1252	23.0802	10.3074	17.4627	14.7521	23.0798	45.5017	6.46527	22.108	29.8272	17.4372	24.4467	51.7027	13.2978	10.5941	0.136829	0.885877	5.0491	1.739e-05	0.00133666
SGK196	24.2745	16.1056	26.7746	27.5556	14.9804	18.8816	20.9095	4.35294	19.9836	14.6826	19.6478	17.6593	20.4615	23.1041	20.2568	31.6905	22.5967	26.1805	34.1593	33.4756	27.8515	24.205	27.3925	35.405	20.4985	43.1069	38.5957	28.6103	27.2335	38.9076	28.1256	40.4459	33.6451	22.3875	0.0480963	-0.633917	4.81199	1.73086e-05	0.00133666
CLTC	115.891	117.044	225.593	116.485	121.877	85.1977	113.454	95.9822	125.832	74.1368	96.0557	112.993	128.046	90.4424	91.7031	145.06	90.387	138.079	195.914	219.537	148.468	144.767	181.989	147.398	129.52	273.729	215.019	125.774	186.258	212.331	129.829	176.836	143.392	142.32	0.0704493	-0.593666	7.19698	1.76051e-05	0.00134415
SSB	117.301	186.603	54.0984	111.976	177.915	206.777	137.654	76.8293	148.394	192.942	129.166	111.4	116.288	145.351	228.71	111.011	150.117	101.798	128.801	62.5025	69.9063	102.842	137.476	77.0796	86.7012	83.34	92.2771	94.1911	74.4058	72.5959	106.094	81.5464	59.7601	81.1545	0.0868712	0.657159	6.88736	1.90922e-05	0.00144976
SAMD9	4.22846	1.94378	1.51036	2.3798	5.1784	17.8071	2.71049	5.65882	3.09424	3.30876	4.18425	1.59332	2.49982	3.21703	9.03344	4.90449	5.46927	1.19606	2.00937	1.11214	0.776736	1.15814	4.62249	2.33575	1.21473	1.4369	0.783669	0.557344	2.59367	1.30483	1.54275	1.17804	1.60215	0.799552	0.147454	1.50055	2.36181	1.92995e-05	0.00145758
ATL3	30.3823	26.3799	35.6994	31.1879	17.5696	29.1668	20.1351	20.8941	37.9044	17.9914	16.1912	31.3353	31.8496	27.2716	18.6144	24.5224	18.4228	30.3003	46.6174	39.7036	38.8368	36.2496	42.972	35.2821	16.5507	51.848	40.1631	27.4956	58.8438	51.8373	32.7539	40.8386	29.3193	43.1758	0.0522385	-0.615656	5.11629	1.97469e-05	0.00147542
TBL1X	7.36066	4.30409	13.7305	9.39394	4.62357	3.2237	6.00181	6.31176	7.21989	6.30732	10.7335	7.16994	6.85136	7.45766	6.4329	10.8465	9.78712	7.97375	7.0328	16.9046	14.3141	7.87532	10.6146	11.5558	10.3252	13.7703	12.0489	15.7914	11.1852	13.9972	16.2583	12.4348	16.1817	14.3919	0.0204755	-0.738711	3.60695	1.97236e-05	0.00147542
ABTB2	2.50576	9.02471	4.39378	7.76566	9.24714	9.51758	3.48492	2.17647	1.03141	4.65294	5.82156	2.65553	2.68499	2.12031	13.5502	17.3543	8.34784	2.65792	2.41124	1.77943	2.33021	0.926508	3.93768	5.4091	1.97393	2.39483	1.76326	1.48625	1.13473	0.948966	0.71204	3.14143	2.72365	3.19821	0.175955	1.39362	2.66621	2.03726e-05	0.00150607
TPCN1	63.2704	69.282	96.6631	86.0485	56.7775	33.158	94.2865	43.747	43.1904	33.191	31.109	65.8572	79.5313	28.7339	36.2706	109.691	49.2235	80.9336	112.525	130.566	107.522	100.179	99.8116	117.279	88.0678	92.4404	94.824	57.5922	85.2668	124.908	60.7608	100.788	135.862	87.551	0.106165	-0.730988	6.36412	2.02759e-05	0.00150607
CD80	2.03593	1.24957	16.614	3.00606	1.84943	12.5878	0.58082	7.61764	1.28927	2.89516	1.45539	2.65553	1.85172	1.0236	1.77931	2.26361	0.86357	0.664479	0.803748	0.111214	2.44117	0.463254	1.19842	0.983472	1.51841	0.83819	0.0979587	0.371563	1.29683	0.830345	0.118673	0.654465	0.320429	0.199888	0.395327	2.07419	2.08301	2.0591e-05	0.00150627
PDCD1LG2	0.939659	0.971892	0.137305	1.87879	5.54829	4.45177	1.54885	1.30588	0.773559	4.44614	2.72886	1.7261	0.648102	1.5354	13.0027	2.16929	8.05998	0.930271	0.401874	0.778501	0.221925	0.115814	0.342407	0.122934	0.303682	0.478966	0.489793	0.557344	0.972625	0.355862	2.01745	1.04714	0.801073	1.19933	0.302626	2.01731	1.9638	2.05686e-05	0.00150627
TAP1	28.9728	27.4906	17.5751	29.1839	38.4681	20.2632	16.6502	14.8	19.9836	30.7094	32.0186	26.6881	17.8691	16.4507	50.3683	34.6144	49.0795	14.8843	36.1687	11.6775	13.2045	11.9288	20.3732	17.0878	8.5031	17.4822	14.106	15.4198	16.0483	11.6248	17.2076	18.1941	14.0989	13.9922	0.0888252	0.780533	4.593	2.212e-05	0.00160135
GPD2	32.4182	42.6244	13.5932	41.7091	63.4354	65.395	31.7515	30.2529	30.0399	32.157	31.4728	51.2518	36.0159	31.8047	52.2844	27.7292	25.7632	28.041	21.0984	16.571	23.9679	24.8999	31.3302	27.0455	21.4096	35.5632	13.7142	18.5781	31.6103	16.1324	28.8376	18.5868	18.4247	14.5918	0.0748968	0.696834	5.02571	2.20662e-05	0.00160135
PIK3IP1	26.9369	21.5205	21.2823	21.6687	11.8363	28.5527	24.7817	21.7647	12.8927	10.1331	14.1901	22.7048	27.3129	38.385	7.8016	24.6168	16.4078	31.3634	30.9443	30.584	47.048	22.2362	47.5945	31.3482	43.5784	20.5955	30.6611	26.1952	39.7155	50.0579	30.143	47.2524	27.8774	20.5885	0.0784719	-0.719333	4.89344	2.23829e-05	0.00161203
MS4A4A	55.1267	11.5239	55.1968	27.6808	34.9542	177.457	19.3607	109.694	50.5392	65.7616	90.2342	20.0493	30.5534	202.527	53.9269	32.1621	96.288	21.1304	4.62155	30.4728	11.2072	12.6237	6.84813	10.3265	23.839	28.3787	10.4816	24.8947	26.2609	15.8952	66.2197	14.5291	20.9881	82.5538	0.429181	1.44303	5.58999	2.26305e-05	0.0016215
FCGR3B	13.7817	8.74702	2.74611	3.38182	11.2815	94.5617	8.90591	9.7941	8.89593	10.8569	18.1924	6.37328	4.16637	19.5946	15.6032	8.8658	32.6717	6.5119	6.63092	3.33643	2.88502	1.62139	5.82091	2.21281	10.6289	4.55017	1.86121	7.80281	5.67365	4.27035	8.66316	14.0056	2.08279	4.19765	0.421499	1.54543	3.70441	2.34708e-05	0.00166464
IL27	3.60203	2.36031	0.686527	5.88687	8.13749	10.4386	4.25935	2.17647	1.9339	5.58353	5.45771	9.82548	2.31465	3.29014	4.79046	4.24427	14.8246	2.65792	1.20562	0.444858	3.21791	1.27395	3.93768	2.08988	0.455523	1.79612	0.587752	0.928906	2.75577	1.18621	1.7801	0.916251	1.44193	4.9972	0.148215	1.43357	2.49404	2.34342e-05	0.00166464
CR1	46.8263	32.4889	61.3756	34.8202	32.365	21.7983	30.2027	19.3706	47.8317	24.2987	20.1935	37.443	44.0709	17.1819	17.1088	38.67	21.0135	59.6702	91.6273	49.6016	31.5133	59.9914	35.0967	78.8007	34.1642	54.7218	39.3794	40.3145	71.0016	68.9186	37.1448	40.5768	38.4515	87.551	0.105852	-0.756616	5.51004	2.37213e-05	0.00167391
RAB3D	68.1253	59.2854	149.938	99.5758	56.7775	24.715	56.7268	106.429	71.0385	51.2857	85.6861	61.3428	58.0514	72.0907	101.695	107.144	148.966	76.0164	114.333	191.845	166.887	77.8267	100.496	125.27	72.4282	159.256	146.938	150.297	109.096	133.923	155.462	181.81	196.583	243.464	0.140378	-0.813998	6.8481	2.39743e-05	0.00168326
CCL7	4.22846	1.24957	0.274611	0	1.10966	1.6886	0.387214	44.8352	20.6282	1.65438	0.181924	0	0.370344	0	0.958092	0.565902	0.575713	0.398688	0.401874	0	0.443849	0.115814	0.856017	1.22934	1.06289	0.957931	0.0979587	0	0	0	0.118673	0	0.320429	0	1.60757	3.29641	2.18072	2.44437e-05	0.00170306
PSMA4	98.351	326	121.378	160.073	263.913	426.142	185.669	202.411	255.403	230.372	303.995	211.38	186.376	266.721	390.765	167.13	241.224	92.7613	215.806	101.539	108.41	164.571	241.91	124.778	114.033	148.12	119.51	158.843	185.123	120.044	212.663	118.72	93.5654	112.937	0.112656	0.721097	7.60165	2.45401e-05	0.00170306
HYPK	63.427	61.2292	36.2486	56.9899	78.2308	80.7459	71.0537	82.9234	79.1609	77.3422	102.423	40.2313	47.1263	78.7441	99.6415	43.1029	58.7227	55.1518	64.0989	27.3588	40.7232	40.3031	49.649	43.2728	36.5937	41.4305	33.7957	57.5922	33.3935	31.909	72.0347	32.8542	37.6504	40.3774	0.0737039	0.636528	5.86778	2.4622e-05	0.00170306
CPNE2	29.1294	30.1286	37.8963	26.9293	25.3372	7.06143	25.1689	22.6353	40.6119	32.7774	19.2839	22.4393	29.5349	20.1795	18.7512	20.1839	19.7182	31.895	47.6221	42.9288	37.8382	45.8622	32.5286	51.5093	29.3053	52.806	57.9915	34.7411	29.0166	38.789	37.9755	26.3095	21.3085	55.7688	0.0691866	-0.667473	5.12336	2.48127e-05	0.0017078
ZCCHC2	93.9659	120.653	38.8575	110.348	147.584	120.812	72.0217	158.447	71.4253	112.601	83.1391	82.8527	86.3827	85.5437	171.635	144.494	85.7813	74.9533	95.646	34.2541	57.5894	54.8956	117.788	109.78	54.8146	55.3205	62.3017	45.888	58.8438	38.1959	52.2163	67.5408	50.1472	33.981	0.113276	0.74094	6.4378	2.57913e-05	0.00176645
APOBEC3D	9.86642	8.05282	3.84455	7.89091	17.3846	28.0922	9.68034	5.44117	7.21989	7.8583	11.2793	8.76326	6.20326	20.9107	13.687	9.80897	18.8546	5.05004	6.83186	2.66915	4.43849	6.833	7.19054	5.28616	1.97393	3.95147	2.54693	6.87391	6.15996	5.45655	12.5794	6.54465	3.84515	5.39698	0.117062	1.02961	3.40645	2.6244e-05	0.00178311
TIPARP	58.1022	72.6142	278.593	63.3778	37.7283	60.6362	70.2793	46.7941	30.0399	32.3638	35.4751	35.053	38.5158	53.3734	48.0415	68.6628	72.6838	111.5	199.932	88.0818	304.703	57.9068	141.756	338.56	106.137	272.172	616.454	78.2139	58.5196	99.4042	45.5706	39.3988	111.509	88.9502	0.386701	-1.33385	6.87528	2.62898e-05	0.00178311
NLRP12	43.0677	47.2062	33.2279	44.8404	37.7283	20.1097	37.9469	30.0353	26.6878	32.674	32.3824	44.613	45.9226	23.3966	30.2483	54.0437	36.8456	57.6768	57.0661	56.6082	49.6002	38.4501	44.5129	58.0248	42.6673	46.8189	44.0814	41.9866	50.7386	72.5959	43.6718	67.6717	64.8869	59.7665	0.0447937	-0.54227	5.56184	2.65961e-05	0.00179517
SAT1	1660.22	3917.42	783.328	517.293	1549.64	2387.53	2663.84	2914.94	1396.92	2027.96	1224.53	1172.15	1352.5	886.877	786.593	1105.87	1115.16	1396.47	1983.45	299.945	617.061	1001.44	1185.75	900.615	1189.67	501.357	673.858	659.895	807.441	462.739	491.664	505.902	666.012	637.843	0.2106	0.964466	10.2609	2.73967e-05	0.00184032
PRKAR2A	28.1898	30.4063	30.2072	22.5455	23.4877	17.193	27.8794	29.6	27.8481	15.9234	32.9282	24.0326	26.6648	25.3707	21.4886	30.7474	22.165	37.2108	37.5752	29.6943	40.6122	31.2697	37.8359	38.1095	23.839	34.6053	35.7549	41.2434	36.7976	34.4	33.9406	34.294	36.3687	36.9793	0.0176711	-0.47018	5.04011	2.78633e-05	0.00186271
SFT2D2	75.7991	73.0307	139.09	108.594	47.1604	78.2897	89.0591	48.3176	73.617	53.0435	69.8587	65.0606	79.7165	92.6358	66.5189	134.402	106.363	83.5915	132.016	174.495	139.813	75.6262	125.663	112.608	107.959	167.039	170.546	86.3883	132.925	132.855	84.8515	202.622	120.161	157.512	0.0938637	-0.667744	6.77792	2.96103e-05	0.00197008
LINC00674	17.2271	24.9915	25.9507	39.0788	17.5696	12.4343	29.8154	17.847	28.4928	12.201	7.82272	32.7958	32.1273	19.8871	13.2764	18.3918	18.8546	25.1173	54.4539	23.7999	66.4664	31.5013	46.3961	40.5682	20.9541	65.3788	41.7304	11.89	65.1659	42.4662	26.7015	34.0322	21.3085	38.1786	0.128044	-0.836762	5.02015	3.04342e-05	0.00201529
ABI3	181.511	83.5827	93.9169	213.18	184.388	379.475	171.729	88.5822	143.495	136.279	143.174	180.709	146.934	309.639	227.068	114.595	180.63	101.267	53.8511	101.428	123.057	65.203	78.4111	72.5311	100.974	129.68	54.2691	109.239	107.475	115.062	136.593	198.565	45.6612	96.346	0.142231	0.802937	7.13832	3.11167e-05	0.00205077
LARP7	5.01151	5.27598	3.29533	6.63839	14.4255	13.0483	8.32509	9.7941	6.57525	12.9248	11.2793	6.10773	5.18481	9.35863	13.0027	8.58285	11.3703	5.05004	5.62624	3.33643	4.10561	4.16929	4.28008	6.63844	4.25155	3.83172	5.58364	4.83031	3.7284	4.15173	7.35775	4.71215	4.16558	5.39698	0.0195197	0.858097	3.15592	3.13104e-05	0.00205385
DHRS3	0.626439	0.555367	1.92228	1.37778	0.369886	1.38158	1.74246	106.865	0.644633	1.13739	0.181924	1.85887	0.46293	0.658029	0.684351	0.754536	0.287857	0.797375	0.602811	1.00093	0.998661	0.579068	1.02722	1.72108	1.67025	0.478966	0.489793	0.743125	0.162104	0.237241	0.35602	0.392679	0.160215	0.399776	1.63394	3.13364	2.58019	3.18214e-05	0.00207761
CPAMD8	1.25288	2.63799	2.05958	2.25455	0.369886	0.767547	1.35525	1.74117	1.16034	1.34418	1.09154	2.92109	2.59241	0.5118	0.410611	1.79202	1.0075	3.85398	1.80843	2.66915	5.21523	2.31627	3.25286	5.28616	3.3405	6.34629	4.99589	1.67203	3.56629	5.57517	1.54275	2.74875	8.49138	1.79899	0.00402392	-1.29371	2.23139	3.25851e-05	0.00211758
NDRG2	4.07185	4.85946	8.10102	5.26061	2.77414	2.14913	6.58263	3.69999	7.73559	3.20536	6.54925	5.17829	7.12912	6.43406	3.14802	2.35793	2.59071	5.71452	4.42061	17.127	9.4318	7.06463	5.82091	6.8843	15.9433	9.45957	6.56323	15.4198	7.6189	15.8952	7.5951	11.5186	5.28708	5.99664	0.0661217	-0.944041	3.19626	3.28344e-05	0.0021239
FAM168B	31.322	18.4659	60.9636	37.4505	20.1588	14.2764	21.8776	57.894	18.3076	14.786	19.8297	20.3148	21.9429	18.7173	20.2568	44.5177	29.7932	39.0714	39.3837	54.0502	69.2405	30.9222	40.0616	55.0744	31.4311	54.7218	48.8814	33.2548	41.8229	43.4152	29.787	64.5303	67.6106	59.3668	0.114829	-0.779807	5.32289	3.39196e-05	0.00218399
SLC12A6	45.1036	49.4276	78.5387	59.3697	35.8789	27.4782	49.5633	73.7823	32.1027	23.7817	30.5632	39.3019	50.7371	25.7362	23.4048	62.5322	27.3464	51.9623	102.076	74.2913	80.4477	61.2654	61.462	82.9805	46.3115	85.2559	67.7874	48.6747	82.9973	79.7131	36.7887	63.614	77.7041	66.1629	0.0912285	-0.681001	5.87478	3.5674e-05	0.00228641
C7orf41	3.75864	3.60988	6.86527	4.00808	4.06874	4.45177	5.03378	4.57058	4.3835	2.17137	4.18425	4.51441	3.05534	1.68163	1.50557	3.867	2.44678	5.31583	8.64029	6.33922	9.4318	7.18044	10.2722	7.37604	5.46628	7.90293	8.32649	6.13078	6.64627	6.99862	3.91622	5.89019	8.81181	6.39642	0.00165822	-0.90586	2.9134	3.63581e-05	0.00231962
SLFN5	86.1354	13.4676	39.1321	83.1677	41.4272	59.1011	30.2027	84.0116	40.2251	53.9741	19.2839	90.8193	33.7013	102.652	97.5885	190.049	66.0631	41.8622	17.8834	31.0288	23.7459	9.61252	27.3925	33.3151	31.8866	44.4241	13.6163	16.7203	56.5744	22.7752	45.9266	58.771	39.2526	18.3897	0.250779	1.07779	5.69116	3.82834e-05	0.00243135
LAP3	324.809	464.981	155.155	369.62	417.786	470.353	496.021	463.37	353.645	633.007	331.101	452.901	298.59	180.665	659.304	668.048	796.211	192.3	468.183	134.569	110.297	194.567	655.538	314.588	144.705	263.671	186.905	81.7438	305.08	111.622	159.497	216.628	165.982	270.449	0.198998	0.922708	8.42534	3.96306e-05	0.00250551
COA1	47.766	67.3382	29.5207	63.5031	57.7022	86.7328	39.6894	55.0646	43.0615	53.6639	67.4937	61.6084	61.4771	42.2601	49.6839	54.5153	66.207	37.8753	36.1687	27.2475	35.8408	45.0515	64.2013	42.5352	26.1167	34.725	29.0937	35.4842	52.6839	31.5531	40.8236	39.3988	33.0042	34.1809	0.0489071	0.539926	5.62453	4.25857e-05	0.00268022
MAPK1	97.7245	63.8672	109.982	77.6566	56.5925	58.18	54.7907	64.6411	93.9874	54.5945	62.9456	58.6873	82.2163	77.5012	51.6001	87.4319	67.5024	105.254	115.539	97.4239	86.9945	87.3234	93.9906	111.747	89.2825	117.227	97.077	88.9892	111.528	112.334	71.9161	122.909	90.5213	103.142	0.0470505	-0.491904	6.47672	4.3475e-05	0.00272391
MAFB	641.474	454.429	419.331	269.418	733.668	375.177	398.055	968.31	992.605	550.908	551.411	308.839	419.137	534.685	455.641	295.307	199.629	473.774	245.746	152.141	336.771	338.291	249.957	386.382	554.979	330.606	224.913	314.156	161.78	198.927	317.689	186.13	219.975	247.861	0.145032	0.781483	8.65427	4.45762e-05	0.00276808
APOBEC3C	272.814	169.109	157.489	209.673	248.748	270.023	218.388	224.829	253.083	252.603	262.698	226.65	166.377	303.351	303.168	233.435	324.702	181.536	143.067	147.47	141.477	177.542	203.218	160.06	163.381	191.107	130.971	174.449	201.982	147.801	224.055	199.612	138.265	191.093	0.0512455	0.47985	7.71986	4.44828e-05	0.00276808
FOXJ2	36.0203	23.3254	24.1658	50.3515	26.0769	19.0352	31.5579	19.8059	22.1754	14.6826	14.5539	25.0948	35.2753	15.5002	14.782	35.7462	28.3539	40.1345	43.6033	28.2485	83.1108	37.292	47.7657	55.5662	35.379	50.4111	36.0488	25.8236	50.7386	45.4317	16.2583	45.6817	36.0483	32.182	0.0913812	-0.708381	5.17285	4.67574e-05	0.00289068
SQLE	7.04744	1.80494	10.0233	2.88081	7.7676	3.83773	2.12967	28.2941	2.83638	5.37673	4.54809	2.78831	2.03689	3.36326	8.89657	2.35793	2.015	3.1895	0.602811	2.66915	1.55347	1.7372	1.02722	0.860538	3.18866	2.15535	1.76326	1.48625	1.29683	1.30483	2.25479	1.9634	2.08279	3.59798	0.267163	1.50809	2.56394	4.75043e-05	0.00292392
CD274	0.783049	1.38842	0.686527	2.00404	3.51391	5.83335	1.35525	0.435294	1.28927	1.96457	1.63731	3.71775	0.370344	0.731143	9.99153	2.82951	9.21141	0.531583	1.20562	0.667287	0.443849	0.231627	1.71203	0.245868	0.151841	0.718448	0	0.557344	1.29683	0.593104	0.830714	0.654465	0.160215	0.799552	0.265579	1.94043	1.91263	4.83853e-05	0.00294853
SP140	3.1322	2.49915	1.23575	3.00606	5.1784	7.98248	1.74246	2.39411	1.03141	4.54954	2.18308	2.12443	1.57396	1.82786	1.91618	3.20678	5.6132	1.32896	1.6075	0.889716	0.665774	0.347441	1.02722	1.59814	0.911046	0.718448	0.979587	0.185781	0.486312	1.18621	0.71204	0.916251	0.961288	2.59854	0.00512024	1.45851	2.01964	4.85253e-05	0.00294853
GPBAR1	148.623	104.687	56.7072	189.507	185.868	165.483	133.201	79.8764	129.442	134.832	174.829	176.062	108.511	149.665	165.476	79.6036	163.79	95.4192	54.0521	92.8641	132.378	95.662	101.866	68.5972	69.5432	101.541	52.7997	114.441	86.5636	68.3255	138.136	52.8808	26.7558	74.3584	0.112548	0.704983	6.83407	4.85372e-05	0.00294853
NM_176796-T14321	0.939659	0.138842	0	3.63232	7.95254	3.3772	0.774427	1.74117	0.773559	2.27477	1.81924	1.7261	0.277758	0.584914	6.56977	0.188634	2.73464	0.265792	0.200937	0.222429	0.665774	0.231627	0.171203	0.491736	0.303682	0.598707	0.195917	0.185781	0.486312	0.237241	0.474694	0.523572	0.320429	0.199888	0.244938	2.24093	1.70072	4.90611e-05	0.00295531
CXCL9	2.03593	4.85946	3.02072	8.26667	5.73323	1.6886	10.842	9.7941	7.47774	14.5792	4.00232	8.23215	3.70344	6.87274	8.21221	10.0919	35.2624	1.86054	3.61687	2.22429	4.54946	1.7372	1.02722	1.84401	0.911046	6.58578	3.23264	2.22938	6.80837	2.25379	2.37347	4.31947	5.60751	4.59743	0.251712	1.33749	2.99996	4.90718e-05	0.00295531
HNRNPA0	12.6854	13.3288	26.3627	15.1556	7.02783	7.06143	19.5543	19.3706	24.625	9.20248	15.0997	12.3482	15.5544	14.6229	6.15916	17.0714	9.64319	23.2568	31.1452	23.355	30.1818	23.3943	17.4627	15.7356	10.9326	27.6603	27.8203	30.4681	20.9114	26.571	24.5654	19.5031	23.872	15.7912	0.0611767	-0.689764	4.39327	4.97297e-05	0.00298208
CBR1	50.1151	69.4208	17.7124	48.4727	74.9019	102.544	69.1176	42.4411	48.9921	83.2359	89.5065	67.5833	55.7368	57.0292	100.052	45.4608	77.4334	39.8688	57.6689	28.5821	25.0775	48.4101	68.8238	30.1188	22.928	25.7444	27.9182	43.287	41.4987	38.3145	66.1011	28.9274	28.6784	39.7777	0.108007	0.721152	5.76459	4.99835e-05	0.00298449
TRIM5	30.0691	41.5137	10.4352	33.0667	41.7971	63.5529	20.5223	18.7176	15.2133	36.0861	45.1171	31.2025	25.6463	18.0592	42.2929	64.4185	51.5263	20.466	21.0984	16.1261	12.3168	19.225	44.1705	20.1612	14.5767	16.1651	15.1836	8.54594	21.8841	16.1324	17.5637	26.5713	17.3032	21.388	0.131352	0.82915	4.87363	5.19838e-05	0.00309071
KIAA1147	4.54168	9.9966	13.3186	9.89495	2.21931	4.60528	9.29312	9.7941	5.80169	1.55098	4.18425	7.16994	9.72153	4.97177	3.01115	8.11127	3.74214	8.23954	15.2712	15.4588	18.1978	6.71719	16.7779	12.1705	7.59205	20.5955	17.2407	5.20188	18.1557	14.8276	5.45898	8.37715	16.3419	5.99664	0.102829	-0.925152	3.5459	5.2895e-05	0.00313156
RRAS	29.5993	7.63629	19.0855	19.6647	27.1866	28.8597	12.1972	24.5941	19.339	27.1938	39.8413	19.1198	15.1841	39.1162	24.3629	6.79083	40.8756	16.2133	6.63092	14.1242	15.9786	7.41207	9.24498	11.3099	8.80678	15.0874	8.32649	18.9497	16.0483	14.3531	21.9546	8.50805	3.04408	18.5896	0.134522	0.885294	4.34654	5.34348e-05	0.00315017
GIMAP4	59.8249	88.581	5.49222	47.4707	146.845	249.299	67.1815	11.1	37.5176	49.7348	42.2063	89.2259	71.569	28.0028	62.5497	31.1246	39.4363	44.1214	44.4071	22.0205	13.3155	43.7775	54.1003	23.7263	15.6396	27.5405	7.83669	9.47484	37.4461	55.6331	20.1745	20.4193	10.5742	14.1921	0.36478	1.26195	5.61291	5.63046e-05	0.00330541
NT5C3	22.5518	34.0162	19.2228	21.1677	25.892	32.6975	25.1689	25.0294	24.8828	35.9827	36.5667	22.8376	23.0539	28.807	30.1115	30.3701	30.3689	17.9409	23.9115	16.3485	16.6443	16.3297	21.2292	18.9318	18.5246	25.6247	21.0611	23.0369	22.0462	13.9972	17.445	21.99	14.5795	16.9905	0.0208943	0.506956	4.68336	5.69103e-05	0.00332699
TTC3	10.8061	10.9685	17.7124	8.14142	12.5761	9.8246	8.5187	10.2294	17.9208	12.0976	6.54925	11.286	11.4807	15.354	7.93847	16.0339	10.2189	17.4094	18.4862	18.5728	13.5374	19.225	14.0387	16.719	16.5507	14.0097	25.959	18.2066	15.3999	21.8262	13.5288	19.3722	22.4301	12.7928	0.0209159	-0.600433	4.07082	5.7892e-05	0.00337028
SNRNP200	78.9313	57.2028	115.199	50.101	47.3454	21.7983	41.0446	38.7411	68.5889	61.6256	35.4751	47.4013	57.9588	56.3711	47.3571	82.2445	55.9881	81.7309	96.4498	150.584	66.2445	82.6909	60.7772	68.966	73.4911	109.204	109.616	71.1542	59.4922	89.2028	80.5792	118.982	98.532	96.5459	0.0975414	-0.666796	6.24953	5.84972e-05	0.00339138
PHF11	74.7029	106.769	22.1062	71.7697	90.8069	136.777	69.3112	81.8352	67.9443	80.5476	85.868	99.8481	72.7726	56.4442	86.9126	58.5709	67.6463	57.2781	64.9027	22.4653	50.8207	57.9068	91.0802	65.5238	30.0645	41.7897	36.5386	42.1723	71.3258	37.84	49.1308	32.8542	36.8494	43.9754	0.0953371	0.666062	6.04672	5.89182e-05	0.00340168
PRPF8	114.325	80.9447	151.585	74.6505	71.5729	35.7677	63.1158	59.8529	90.5064	74.1368	51.6663	89.8898	101.752	68.7274	59.5386	136.854	55.9881	127.314	125.184	180.612	92.8755	132.954	109.057	104.125	107.807	153.628	165.55	87.8745	103.422	145.192	107.162	192.02	111.83	92.3483	0.0955938	-0.645407	6.74257	6.31565e-05	0.00363137
CTSK	7.51727	6.94208	13.3186	13.7778	4.06874	3.2237	6.77624	10.0118	6.96203	5.68693	4.91194	6.90439	5.46257	6.21472	7.25412	11.6953	6.04499	5.98031	14.2665	11.5663	15.6457	10.7707	9.24498	18.8089	12.1473	11.8544	16.8489	8.54594	10.6989	9.84552	6.76438	20.2884	22.7505	12.9927	0.0581774	-0.792457	3.62498	6.41106e-05	0.00367112
WHSC1L1	13.3118	16.1056	24.8523	19.2889	14.0557	13.0483	17.6182	10.6647	10.7009	8.99568	11.6431	13.2777	14.1657	11.5521	9.99153	27.069	14.6807	13.6883	30.9443	31.5849	24.1898	16.6772	26.0229	23.7263	19.2838	22.7509	25.5672	12.8189	28.2061	33.8069	12.342	32.1997	26.115	16.7906	0.0587571	-0.667815	4.41412	6.45276e-05	0.00367992
RAB8A	645.232	637.006	298.914	461.932	722.387	671.143	550.23	415.052	724.051	638.797	501.2	444.536	406.823	525.253	680.929	443.102	561.032	520.154	499.128	252.234	402.904	370.719	555.897	411.583	352.727	446.755	328.259	369.519	344.471	331.308	385.451	358.123	267.719	346.806	0.0619287	0.501724	8.88624	6.50132e-05	0.00369254
ACP2	27.7199	14.8561	32.1295	44.2142	33.2897	64.7809	29.6218	7.39999	27.8481	40.2221	40.2051	32.5303	18.6098	45.6964	21.8992	12.4499	49.2235	19.0041	16.6778	20.6859	20.0842	12.6237	13.0115	24.4639	15.7915	21.9127	14.8897	22.2938	24.4777	18.8607	24.6841	6.28287	4.80644	18.7895	0.13875	0.844189	4.75797	6.53402e-05	0.00369609
EMP3	1199.16	1035.06	684.056	771.431	851.107	944.389	851.676	1482.83	1191.67	808.164	1156.67	731.998	810.498	885.122	1026.53	484.412	905.453	856.647	785.463	475.442	759.537	716.307	659.818	612.211	628.166	701.924	473.826	810.564	580.171	706.505	704.089	531.164	426.652	641.441	0.063597	0.503537	9.64437	6.7925e-05	0.00382036
PVRL1	7.83049	4.16525	11.671	5.88687	4.62357	3.99124	6.96984	2.61176	5.02813	2.68837	4.00232	5.57662	7.12912	5.33734	3.6955	6.69651	4.17392	9.30271	7.23373	10.1205	12.8716	6.48556	8.90257	10.2035	4.55523	12.5728	6.46527	10.0322	13.2925	11.5062	7.47642	9.29341	7.20966	9.39474	0.00662007	-0.767874	3.23764	6.8084e-05	0.00382036
SCIMP	337.964	321.557	194.15	357.596	296.463	439.651	337.263	196.97	298.594	321.983	366.94	320.523	253.13	460.035	484.384	265.974	443.443	266.722	219.624	280.483	234.796	195.262	230.782	171.001	241.883	248.104	173.387	248.761	189.986	250.052	342.373	228.539	170.148	231.071	0.0671868	0.525553	8.17235	6.89762e-05	0.00385494
GLUL	415.329	670.605	266.235	298.853	537.259	610.353	398.443	1468.68	444.539	550.081	397.139	314.681	255.63	380.926	574.171	336.523	459.707	345.529	436.435	160.26	210.496	263.823	194.145	361.549	384.158	243.793	167.509	352.241	216.409	111.859	229.752	185.345	322.833	534.701	0.166531	0.814776	8.61138	7.10154e-05	0.00395309
CARD16	190.438	208.54	114.238	105.713	184.573	321.909	150.432	237.67	167.862	246.606	204.846	219.878	150.823	188.123	219.677	99.7874	161.344	156.286	148.894	91.3071	113.071	141.061	194.145	101.298	88.5233	97.709	101.779	117.414	161.132	96.2014	189.521	74.8708	103.979	100.344	0.0867113	0.599683	7.30271	7.71344e-05	0.00427668
UBE4B	11.2759	6.52556	32.5414	10.7717	6.473	4.45177	7.74427	7.18234	10.9588	11.2705	10.3697	6.77161	9.44377	13.5261	9.30718	16.1282	11.5143	15.4159	12.4581	34.2541	16.3115	13.2027	10.2722	17.7025	9.86967	27.301	26.3509	21.1791	16.3725	16.7255	17.9197	20.812	33.4849	21.388	0.114575	-0.837246	4.12891	8.26031e-05	0.00456178
LGMN	11.9023	5.41482	7.5518	6.13738	11.0966	9.9781	3.09771	82.9234	9.41164	8.89229	8.18657	2.92109	2.31465	4.67932	6.15916	1.79202	3.74214	9.30271	0.602811	1.66822	5.32619	3.70603	1.88324	1.84401	5.46628	8.50164	3.13468	5.20188	1.45894	1.18621	2.25479	1.70161	1.28172	2.79843	0.538546	1.64952	3.20963	8.33742e-05	0.00458624
DSC2	29.5993	27.9072	42.702	19.9152	7.21277	8.44301	11.6164	8.70587	19.7258	19.2322	19.4658	12.481	13.0546	18.2786	8.62283	8.77149	15.8321	30.566	42.1968	40.1484	25.1884	20.499	31.159	42.6581	13.6657	27.4208	47.9018	40.1288	33.5556	12.9297	45.5706	14.66	12.0161	75.7576	0.188293	-0.940657	4.77099	8.4795e-05	0.0046461
TMCO3	23.6481	24.7138	28.4222	26.1778	18.1244	11.5132	15.8758	43.747	22.1754	16.2336	18.5562	19.7837	24.0724	23.1772	17.2457	21.5986	22.5967	23.5226	37.1734	31.2513	31.5133	24.205	35.2679	32.8234	27.4832	34.8447	41.4365	26.9383	29.8272	41.28	28.6003	28.4038	30.1204	37.3791	0.0371754	-0.531578	4.87895	8.65384e-05	0.0047231
SHISA5	259.816	190.768	162.295	188.505	282.223	207.545	140.946	404.388	165.284	359.621	408.965	178.983	159.433	221.025	400.893	271.162	367.593	168.246	157.334	132.679	111.517	118.361	200.479	149.979	95.6599	119.981	127.15	188.754	119.147	107.352	258.945	187.439	227.184	229.272	0.118032	0.683242	7.73427	8.95161e-05	0.00486661
MRPL46	9.70981	27.6295	3.98186	12.4	21.4534	33.9256	18.199	8.92352	16.5026	30.606	31.6547	24.0326	19.1653	23.1772	26.2791	10.6578	21.1575	5.84742	9.84591	15.4588	3.43983	15.0558	9.58739	4.91736	16.3988	10.178	7.73873	16.7203	7.9431	11.8621	19.3438	9.94787	5.4473	11.3936	0.134634	0.882992	4.13106	9.12103e-05	0.0049395
TOR1B	66.4026	77.196	27.873	53.7334	61.0311	80.4389	20.7159	60.9411	32.3606	45.909	53.8494	58.1562	45.182	37.1421	64.4659	128.083	61.3134	46.6464	41.393	22.9102	24.1898	27.9111	50.505	37.9866	32.9495	39.5147	27.6243	17.835	53.8186	21.8262	29.5497	52.4881	30.601	31.5823	0.113702	0.716876	5.60018	9.1887e-05	0.00494369
SLC40A1	20.8291	23.7419	14.9663	13.402	17.5696	16.272	23.0392	3.04705	15.3423	12.5112	15.0997	31.3353	27.4054	15.4271	12.4552	20.7498	18.2789	25.6489	21.5003	46.4876	17.0882	26.8687	32.1862	21.5135	19.5875	25.7444	21.355	32.3259	33.8798	38.6704	29.9057	24.2152	26.9161	23.187	0.0649943	-0.643767	4.63869	9.19953e-05	0.00494369
IRAK2	7.04744	1.24957	69.0647	1.37778	4.62357	1.38158	2.12967	52.8882	6.18847	2.37817	3.63847	2.52276	2.49982	0.950486	2.32679	3.3011	1.29535	3.45529	2.81312	1.11214	5.54812	1.7372	1.54083	2.82748	4.85891	2.87379	1.6653	0.928906	1.78315	0.474483	1.06806	2.22518	1.1215	0.599664	0.886876	2.10273	3.00272	9.6397e-05	0.00516038
MRPS18C	31.9484	36.793	26.2253	44.8404	58.9968	100.702	32.7195	86.8411	35.4548	80.2374	111.883	48.3307	37.5899	68.2156	124.004	43.5745	93.9852	23.2568	24.3134	37.0344	22.1925	33.8176	32.6998	24.3409	18.3728	31.013	26.8407	44.0302	30.3135	17.4372	72.7468	43.9801	38.6117	61.3656	0.170575	0.850427	5.67558	9.96716e-05	0.00531531
TDRD7	12.059	16.9387	14.5544	20.9172	21.6383	32.6975	12.3908	10.8823	10.443	22.3341	26.7428	12.7466	15.8322	23.5428	40.2399	25.277	24.036	9.03692	11.0515	13.5682	10.7633	11.6972	12.4978	13.2769	7.59205	9.10035	10.3836	12.6331	13.941	10.5572	17.089	20.0266	14.2591	10.1943	0.0714618	0.708585	4.20524	0.000102748	0.00545856
ZNF395	11.7457	15.8279	20.7331	22.0445	5.54829	4.75879	22.8456	56.1529	12.5059	7.9617	9.82388	14.3399	16.2025	5.48357	7.39099	18.2975	7.34034	17.9409	32.3509	31.6961	55.1483	12.392	32.871	40.6912	16.0952	40.5923	36.4406	17.0919	33.5556	32.7393	14.8342	33.5086	32.2031	20.9882	0.200004	-0.960364	4.62325	0.000104563	0.00553393
GAS7	236.794	315.726	386.927	277.56	222.671	153.816	275.309	207.2	229.102	207.935	120.979	272.591	257.667	134.457	220.635	302.663	310.021	274.829	410.514	314.292	444.848	288.723	360.041	375.195	315.07	404.247	394.284	257.121	411.907	325.139	204.593	359.694	351.671	453.746	0.0743713	-0.536653	8.23862	0.000106321	0.00560575
DUSP6	998.544	440.683	274.062	505.645	909.549	570.287	314.224	457.929	910.737	577.999	383.313	374.032	303.404	252.244	581.562	200.99	487.053	554.176	258.807	305.84	247.335	237.997	259.202	300.574	471.163	262.473	52.8977	218.85	159.348	312.803	342.373	196.863	221.096	372.391	0.179056	0.822251	8.63135	0.00010965	0.00575949
RBCK1	109.783	83.9992	69.202	114.23	132.419	105	68.3432	54.847	72.4567	113.945	87.6872	110.869	85.5494	76.6238	160.959	99.3159	89.2355	77.7441	56.8652	69.0642	90.3233	63.9291	83.8896	72.1623	46.4634	67.8934	58.1874	58.8927	76.8374	74.6124	73.9335	59.0328	39.2526	60.1663	0.0619996	0.523008	6.39548	0.000111142	0.0057943
NM_001135733-T19970	3.1322	2.36031	8.78755	6.76364	3.32897	5.52633	5.22738	2.39411	2.83638	2.79176	3.45655	4.24885	3.9812	4.82554	3.42176	7.1681	2.15892	5.18294	7.83654	7.22894	13.4264	4.74836	9.58739	10.5723	3.3405	5.26862	7.93465	5.20188	7.13258	9.1338	6.40836	7.98447	14.2591	6.59631	0.0266854	-0.858262	3.01947	0.000111125	0.0057943
TMEM140	8.92676	13.7453	1.64767	12.4	12.946	36.5352	14.7141	9.57646	6.18847	9.71947	5.82156	14.7382	9.07343	11.0403	9.85466	10.3749	17.2714	9.7014	8.03748	5.44951	4.21657	3.82185	9.24498	3.31922	13.0583	7.66345	3.52651	2.60094	8.26731	6.04966	7.23908	4.45036	3.04408	3.59798	0.135112	0.958427	3.4799	0.000112743	0.00582917
C1GALT1	60.1382	79.4174	49.0181	47.3455	57.8871	92.7196	48.4017	53.3235	51.1838	65.4514	67.8576	57.3595	56.2923	75.0884	90.1975	66.3049	55.1245	51.4307	58.8746	40.1484	44.163	38.2185	61.2908	39.2159	42.971	44.4241	41.6324	43.287	45.3892	35.5862	64.0836	41.7549	39.7332	29.9832	0.0443147	0.481787	5.82331	0.000113062	0.00582917
QARS	44.4772	51.6491	86.9144	43.3374	39.3928	24.715	45.4976	69.4293	54.0202	34.225	56.3964	30.5386	47.404	69.8242	45.7147	67.9083	66.0631	45.1846	86.6039	82.2987	68.1309	59.644	67.9677	74.0063	50.8668	68.0131	98.8403	88.8034	58.0333	87.0676	79.8672	94.5048	113.592	89.1501	0.0793835	-0.593075	6.07643	0.000112743	0.00582917
FMNL2	16.9139	14.5784	30.0699	10.0202	19.7889	50.6581	16.0694	18.0647	17.4051	22.4375	22.1947	16.8626	12.3139	66.8996	34.4913	16.8828	19.7182	12.4922	12.659	16.3485	6.21389	5.21161	10.2722	4.54856	13.6657	15.2072	12.0489	13.7478	12.1578	13.1669	19.4624	28.5347	5.76773	8.59519	0.175949	0.931087	4.34951	0.000113682	0.00583957
DDX60L	236.794	332.942	164.767	276.558	240.981	466.515	203.868	131.023	107.009	152.41	136.807	283.744	179.524	93.2207	343.955	386.7	155.443	136.218	159.142	143.467	99.6442	126.237	244.65	196.571	89.1307	138.661	85.6159	65.395	186.42	87.7793	70.3733	200.135	131.536	105.541	0.154252	0.768271	7.5282	0.000114527	0.00584003
EEF2	1806.81	1044.09	1946.31	1135.04	923.05	504.585	1281.87	1094.33	1921.01	1196.32	765.535	1041.63	1380.27	1074.93	512.032	1281.39	1744.41	2009.25	1516.87	2309.26	2152.78	1813.52	1718.03	1723.41	2410.32	2428.59	2422.22	1907.79	1435.92	2577.39	1416.01	1207.49	812.929	2569.16	0.118998	-0.663861	10.6294	0.00011417	0.00584003
RGL1	4.69829	2.77683	9.33677	11.1475	16.09	24.101	4.45296	7.83528	4.77028	17.0608	15.4635	5.31107	4.53671	6.1416	35.9969	12.0726	15.5443	4.91715	1.80843	5.67194	3.66176	2.31627	3.76647	3.19628	5.01075	5.62785	4.5061	7.43125	5.83575	2.60966	6.05234	7.33001	6.40859	11.5935	0.218596	1.13862	3.39538	0.000120705	0.00613271
PARP9	22.5518	51.9268	10.9844	36.8243	17.3846	104.386	7.35706	52.0176	23.8514	67.6227	93.1449	30.8042	12.7769	21.8612	68.7089	34.803	77.5773	11.5619	37.9771	13.4569	9.98661	3.70603	59.5788	11.187	15.1841	19.2784	20.4734	13.3763	16.2104	4.62621	17.9197	27.3566	8.49138	27.3847	0.355	1.19848	5.05812	0.000131605	0.0066382
MAGOHB	14.8779	13.6065	8.78755	12.901	17.7545	28.2457	12.9717	8.27058	15.858	15.303	21.1032	17.6593	13.7027	16.3776	17.93	9.71466	15.5443	13.4225	9.64498	6.56165	7.87833	12.8553	12.8403	6.02377	9.56599	11.3754	8.03261	10.0322	10.861	9.1338	13.4101	9.68608	6.72902	9.39474	0.0245934	0.619137	3.88204	0.000131192	0.0066382
IFIT5	31.7918	43.3186	6.86527	36.699	46.9755	106.842	26.5241	6.9647	21.015	49.2178	51.1206	37.9741	28.0535	32.2434	68.8457	60.6459	60.4499	18.6054	35.9677	14.7915	11.2072	8.5702	60.4348	25.2015	10.0215	15.9256	14.3999	7.24547	26.0988	16.9628	25.5148	28.4038	6.24837	17.9899	0.268264	1.05033	5.06474	0.000134575	0.00669139
ZNF684	14.4081	25.8245	6.31605	14.6546	21.8233	52.5002	10.842	8.92352	12.8927	22.0239	13.0985	23.8998	12.8695	14.5497	30.7958	30.2758	17.4153	9.30271	11.6543	9.00837	9.65372	11.9288	19.346	10.8182	7.74389	7.30422	10.7755	4.08719	14.5894	6.88	10.7993	17.2779	11.6957	10.3942	0.126465	0.84198	4.11832	0.000134251	0.00669139
B2M	10587.1	18818.3	10985.3	6754.75	13175.9	22854.2	10752.7	17802.6	11156	19215.9	23724.5	14737.2	12574.4	15707.1	21572.3	14436	20733.4	8863.89	9591.73	7455.15	6280.36	10139	14731.9	7965.51	8715.83	7223.76	10986.4	12929.8	12272.7	6168.99	15583.5	10486.9	9925.78	13012.7	0.104153	0.612749	13.6715	0.000134376	0.00669139
UNC119B	2.50576	1.80494	3.98186	5.13536	2.5892	4.9123	2.32328	3.91764	2.4496	1.44758	1.45539	3.31942	3.79602	3.21703	3.01115	7.26241	3.59821	3.58819	7.23373	11.4551	7.6564	4.40091	7.19054	5.7779	1.36657	5.74759	5.38773	2.04359	9.72625	12.0993	2.84816	10.3405	5.76773	9.39474	0.0530175	-0.967721	2.81757	0.000134455	0.00669139
LINC00487	0.469829	1.11073	0	6.26263	5.54829	3.68422	0	2.39411	0.38678	0.103399	1.27347	1.32777	1.20362	0.0731143	0.684351	1.32044	0	0.132896	0.200937	0.222429	0.110962	0.115814	1.02722	0.245868	0	0	0	0	0	0	0	0	0.480644	0	0.383697	2.5716	1.5188	0.000137647	0.00674472
APOL4	1.09627	1.52726	0	1.12727	4.62357	1.07457	2.51689	1.08823	2.06282	1.96457	1.27347	9.82548	2.03689	0.804257	6.15916	6.79083	11.0825	0.531583	2.61218	0	0.665774	0.463254	1.71203	0.245868	0.455523	1.31716	0.881628	0	1.62104	1.18621	0.474694	1.30893	0.640859	0.799552	0.302505	1.7399	2.03722	0.000138061	0.00674472
HIST1H4H	65.3063	112.601	117.671	81.1637	54.1883	108.992	142.688	105.776	122.738	113.532	151.906	100.778	149.526	114.863	113.329	87.2433	152.852	113.227	190.488	189.176	139.591	188.081	117.446	81.5052	101.885	125.609	151.64	194.327	233.916	230.955	274.017	147.778	171.43	190.693	0.092204	-0.597445	7.16351	0.00013728	0.00674472
PGM1	19.4196	23.4642	29.5207	20.1657	13.8707	7.98248	13.5525	21.9823	26.9456	14.8894	16.1912	16.4643	14.3508	14.3304	16.5613	28.861	20.5817	22.5923	39.5846	31.14	30.1818	22.8153	28.2486	30.3647	12.2991	35.5632	36.8325	20.2502	32.2587	20.9959	20.4118	27.2258	32.844	36.3796	0.0558333	-0.597619	4.69133	0.000137786	0.00674472
SLC26A11	4.38507	2.63799	5.21761	5.13536	2.03437	1.53509	4.64656	4.78823	2.70746	2.17137	1.81924	5.31107	6.5736	3.94817	1.50557	1.50907	2.015	6.64479	5.62624	6.78408	7.76736	7.06463	3.76647	6.02377	8.5031	8.26216	5.97548	5.945	8.26731	7.82897	6.40836	2.74875	2.40322	7.59575	0.00165822	-0.881788	2.79682	0.000136472	0.00674472
TLR7	51.8378	38.1815	83.4817	49.099	99.1294	112.522	24.7817	37.2176	30.5556	116.427	119.888	32.6631	21.6651	85.1051	215.434	96.8636	152.708	31.7621	23.7106	70.2875	12.4278	37.1761	36.1239	19.7924	44.0339	23.4693	21.6489	48.4889	14.4273	24.1986	106.806	51.1792	32.6838	40.3774	0.30323	1.08259	5.95614	0.000139943	0.00678918
PSMB10	201.4	261.578	153.645	135.022	191.786	203.4	285.957	297.958	276.29	283.209	329.828	189.871	177.765	264.089	386.658	242.018	453.086	156.95	188.278	122.447	126.719	143.725	234.035	137.563	158.218	140.217	158.203	208.632	160.807	153.851	275.678	157.726	169.347	203.886	0.0864664	0.571388	7.76469	0.000139573	0.00678918
BATF3	9.5532	8.88587	19.6347	9.01819	6.10311	36.0747	11.81	6.74705	9.15378	3.20536	19.6478	16.8626	9.44377	24.274	15.4663	6.50788	13.8171	5.71452	5.62624	4.22615	7.32351	2.20046	7.87535	3.56509	7.44021	6.34629	0.881628	13.1905	10.3747	7.71035	11.5113	7.19912	5.92794	4.39754	0.167778	0.99505	3.59236	0.000141131	0.0067996
MGAT4B	44.6338	46.7896	56.9818	69.3899	40.8724	23.0264	49.3697	56.5882	43.9639	33.191	41.1148	46.6046	50.5519	41.0902	41.0611	46.7813	44.7617	53.6899	62.2905	56.3857	78.0065	51.537	53.073	70.4412	47.3744	73.5212	69.7466	59.6358	72.4606	64.4111	56.0138	69.5042	62.9644	50.3718	0.0376276	-0.448314	5.81934	0.000140827	0.0067996
GBP2	454.795	760.575	879.991	309.123	495.092	367.194	653.423	548.905	492.628	673.229	283.255	547.306	366.085	262.627	608.525	810.089	827.588	319.216	850.767	231.771	218.818	248.999	606.745	297.254	271.34	357.668	265.958	145.281	402.829	259.661	207.56	364.537	292.392	259.055	0.148888	0.736384	8.80003	0.000142738	0.00685338
IL2RG	144.551	148.005	76.4792	182.994	126.131	201.251	161.855	110.347	127.122	114.462	119.342	91.7487	106.011	80.2795	205.032	101.108	171.85	108.177	108.908	58.9437	91.5439	68.33	84.4033	119.246	52.2333	126.088	59.6568	72.0831	152.216	83.509	70.9667	104.714	74.66	73.5588	0.0847013	0.578112	6.83375	0.000143472	0.00686505
CD74	1233.46	712.258	690.647	975.843	1095.42	1454.96	975.197	1838.9	1121.53	1274.8	628.365	1052.92	683.47	693.343	1158.2	838.384	1555.86	918.842	674.546	639.483	919.323	707.157	846.943	573.979	654.587	905.125	520.552	771.735	731.9	692.389	682.965	821.616	631.406	740.985	0.075233	0.520295	9.82285	0.00014903	0.00710665
GBP3	22.7084	12.7734	14.6917	16.9091	19.7889	65.8555	22.2648	8.05293	25.3985	52.7333	32.7463	13.5432	9.2586	37.2883	76.2367	40.745	34.3989	18.8712	9.04217	12.0112	8.65506	8.33858	22.0852	15.9814	8.80678	19.0389	9.89383	19.507	8.10521	6.40552	30.8551	22.3827	18.5849	9.59463	0.237167	1.01095	4.61509	0.000150269	0.00714134
STAT2	305.389	289.485	105.313	316.639	344.733	370.725	194.575	195.229	176.887	306.06	172.1	289.188	229.058	208.522	341.491	426.879	476.547	227.385	274.078	148.36	135.596	146.041	275.124	217.839	122.384	182.246	115.297	106.638	189.5	146.971	180.74	261.001	151.723	157.312	0.110057	0.63736	7.86715	0.00015082	0.00714323
C22orf28	140.636	173.969	81.4222	111.851	135.563	174.694	78.4107	102.294	120.933	134.211	103.515	75.1516	103.604	102.068	184.501	152.605	146.231	89.4389	125.184	85.8576	49.933	92.0718	123.266	101.912	78.9573	82.5018	89.3383	75.613	68.5701	84.1021	77.2564	97.908	67.931	74.1585	0.0683417	0.52411	6.76358	0.000154714	0.00730294
CDK18	7.9871	4.02641	8.92486	9.89495	10.3568	6.14037	5.8082	8.48822	5.67277	12.9248	7.27695	5.97495	3.51827	5.70292	9.03344	5.56471	13.3853	3.98688	2.61218	6.56165	3.99464	4.05347	8.73137	4.42562	4.55523	6.34629	4.21222	5.01609	2.75577	3.32138	3.32285	3.14143	3.36451	2.19877	0.0167309	0.817822	3.01352	0.000161523	0.00757537
IFI30	5177.36	4335.61	2689.68	4537.53	5964.41	8179.28	4094.4	10945	5574.4	5585.91	6520.15	4482.81	3906.57	5027.41	6556.36	4354.81	7654.39	4265.29	3470.79	2544.25	3251.97	3475.33	4714.26	3416.83	4983.58	3388.2	2797.41	3855.7	4207.74	3167.41	4291.35	3543.27	2671.1	6091.79	0.0906078	0.564758	12.2136	0.00016157	0.00757537
APMAP	46.5131	30.684	49.2927	25.301	27.9264	22.4124	22.8456	40.9176	24.3671	23.1613	42.5702	25.6259	27.4054	34.2175	38.0499	38.9529	48.5038	41.8622	51.6408	53.3829	40.8341	45.978	37.3223	39.5847	34.1642	41.191	39.4773	46.8169	44.9029	50.4138	62.0662	55.6295	57.8375	61.7654	0.0501822	-0.512368	5.42682	0.000167037	0.0078055
BTBD10	17.2271	23.8808	27.3238	14.404	14.2406	22.2588	20.3287	6.31176	21.5307	14.9928	14.9177	24.8292	27.1277	17.9861	16.4244	18.3918	21.3014	25.6489	28.5331	34.9213	23.9679	26.7529	35.7815	15.6126	24.7501	24.547	28.9958	21.9222	43.7681	37.0097	18.9877	26.964	22.5903	30.9826	0.043552	-0.553566	4.68287	0.000167861	0.00781783
DDX24	113.385	110.657	120.005	101.705	152.393	116.514	110.743	289.035	128.669	184.153	178.649	88.5621	104.067	153.979	205.716	124.216	134.141	102.33	96.2488	80.0744	91.433	88.3657	83.5472	97.3637	140.757	91.7219	102.367	126.703	66.6248	68.4442	113.214	93.7194	114.073	70.1607	0.0809691	0.55872	6.9374	0.000169115	0.00782407
RAB37	19.7328	18.1883	20.5958	12.901	7.02783	11.9737	11.6164	6.74705	16.1158	5.68693	6.9131	12.7466	13.2398	19.5946	7.93847	12.0726	11.5143	21.1304	22.7059	17.0158	27.4077	17.0246	13.1827	19.5465	12.6028	19.5178	16.8489	16.7203	19.4525	19.691	15.5462	21.3356	21.1483	19.1893	0.0336954	-0.584646	4.16499	0.000168777	0.00782407
EVL	161.621	121.903	199.505	164.457	146.29	315.462	102.418	222	130.474	191.184	191.748	124.013	89.8084	320.021	272.782	193.633	207.688	95.685	75.9542	146.247	120.838	63.0026	73.275	69.7036	152.297	113.515	94.6281	133.019	88.9952	81.018	139.085	266.367	120.001	59.5666	0.142045	0.721822	7.2554	0.00017174	0.00791929
RPL4	2579.68	2842.78	3070.29	1979.12	1466.41	1265.84	3000.32	3668.87	4078.72	2433.07	2479.26	3150.92	3264.49	2705.81	1486.68	2601.74	2420.3	3419.28	3515.19	3434.41	3729.22	4152.15	3756.54	2473.06	3979.6	3986.91	3930.89	4041.67	4177.26	3828.01	3094.65	2973.5	4020.59	3871.23	0.0725799	-0.500971	11.6373	0.00018531	0.00851694
LGALS9	281.741	351.964	199.505	335.426	289.62	371.032	312.094	501.676	332.888	259.324	380.766	256.79	308.034	367.107	453.862	410.374	509.938	175.423	226.858	182.837	266.199	167.466	303.201	284.961	264.355	284.506	117.55	227.21	241.535	235.225	306.059	329.065	194.501	296.434	0.0750727	0.519714	8.23066	0.000186176	0.00852868
ANKRD36BP1	99.6038	91.7743	147.054	118.99	76.5663	107.457	115.196	49.4058	130.216	42.3935	50.2109	94.8026	122.584	81.3762	81.4378	129.592	66.7827	115.619	177.226	141.576	153.239	122.762	187.125	155.266	102.645	237.088	158.987	83.9731	156.755	197.148	64.321	165.187	109.907	116.135	0.102544	-0.617876	6.93576	0.000190365	0.00869209
SECTM1	504.91	292.123	233.694	405.693	458.288	469.892	316.741	444.87	365.893	400.98	365.485	383.061	336.55	320.094	535.026	443.29	722.664	352.573	247.956	190.622	266.864	254.906	393.597	303.155	146.223	364.253	169.86	292.048	343.012	197.622	298.108	316.892	256.824	390.381	0.0821713	0.5402	8.46086	0.000191422	0.00871187
APCDD1	2.50576	1.52726	3.43264	4.38384	0.739771	0	2.12967	0.435294	1.9339	3.30876	2.36501	5.84217	2.12948	2.41277	2.18992	1.79202	0.86357	3.58819	2.21031	2.89158	4.32753	1.85302	2.56805	4.30269	7.13653	4.19095	6.07344	8.9175	6.32206	3.32138	4.03489	3.7959	7.36987	6.59631	0.0140741	-1.03725	2.46611	0.000196786	0.00892691
PDZD11	18.0101	16.2445	11.3964	14.9051	20.1588	36.6887	20.5223	13.2765	22.6911	21.1967	25.6512	20.8459	16.0174	21.9343	22.5836	11.1294	22.4528	13.1567	9.04217	11.3439	11.9839	12.8553	11.2994	10.4494	11.3881	15.3269	12.1469	18.2066	15.2378	16.0138	15.5462	13.6129	13.1376	13.9922	0.0297707	0.560933	4.22423	0.000200002	0.00904347
RAB39A	3.91525	6.6644	2.74611	7.3899	14.4255	11.2062	7.93788	2.39411	3.8678	6.10052	8.00464	9.16159	4.90706	5.92226	12.8658	4.71585	8.05998	3.3224	4.62155	3.114	4.54946	3.70603	4.62249	4.17976	1.67025	4.55017	2.93876	4.64453	2.91787	3.91448	5.10296	3.665	4.16558	3.19821	0.0290592	0.856705	2.9124	0.000200706	0.00904601
JAK2	207.665	317.253	164.217	200.404	309.409	265.571	231.554	119.053	229.876	200.904	188.109	236.874	226.465	189.805	337.111	317.754	163.215	171.436	244.942	125.672	115.068	187.502	233.179	171.37	118.588	186.078	120.293	120.015	176.045	161.68	177.891	163.878	123.205	82.9535	0.0787368	0.534217	7.62588	0.000203547	0.00914456
OSBPL5	46.6697	61.2292	27.873	57.8667	63.2505	72.7634	39.3022	31.5588	26.301	33.8114	33.1101	52.5796	41.5711	41.9676	56.3905	68.3799	37.2774	29.2371	30.9443	33.1419	32.1791	21.7729	52.3882	34.1757	35.0753	27.301	25.5672	28.053	38.7429	27.4014	28.0069	40.7077	32.5236	18.1898	0.0636619	0.550402	5.37369	0.000212249	0.00950497
OLR1	2.81898	11.6627	48.1942	4.25859	2.5892	0.767547	4.06574	914.334	7.73559	0.620392	0	0.531107	2.12948	0.146229	1.09496	1.22612	1.43928	3.45529	15.0703	0.444858	9.76468	7.64369	2.22564	31.9628	9.71783	14.6084	1.1755	3.71563	0.486312	0.948966	0.474694	0.916251	3.68494	1.79899	2.45252	3.18666	5.12532	0.000214555	0.00957751
PPM1H	1.72271	2.91567	5.0803	2.6303	2.21931	0.153509	2.32328	0.435294	2.4496	0.827189	0.545771	2.78831	2.77758	1.38917	0.821221	2.26361	1.0075	3.85398	4.62155	4.11493	8.10025	5.90649	2.91046	4.17976	3.94787	4.19095	3.62447	5.01609	2.91787	3.79586	2.84816	4.71215	1.28172	3.3981	0.00165822	-1.06538	2.33688	0.000221089	0.00983777
RASGEF1B	371.635	263.244	417.134	106.84	368.036	166.251	120.23	445.088	280.802	173.503	193.931	136.362	156.285	75.0153	162.465	107.993	100.318	274.031	76.3561	21.798	107.079	195.377	67.1117	79.5383	245.679	121.897	34.1876	198.043	42.3092	38.9076	52.691	74.609	53.9923	46.7738	0.324027	1.06253	7.33204	0.000226698	0.0100553
LOC100129034	55.7531	40.5418	45.0362	70.1414	43.4616	35.0001	57.114	28.2941	34.9391	34.225	16.5551	44.7457	61.5697	28.4415	38.5974	55.93	31.3764	67.3782	60.8839	88.3043	64.0253	68.0984	71.2206	58.7625	90.3454	51.0098	53.8773	30.4681	43.9302	97.8621	35.0086	84.6878	51.9095	64.5638	0.0877719	-0.598278	5.80045	0.000230722	0.0101779
ZFC3H1	16.7572	23.8808	41.3289	27.3051	14.9804	25.1755	20.7159	11.5353	30.4267	24.5055	26.5609	26.0242	26.4796	34.1444	27.374	36.1234	15.6882	23.2568	65.3045	51.7147	28.5173	26.2897	48.6218	37.6178	17.7654	27.78	51.5263	32.1402	40.8502	51.0069	45.0959	44.6345	33.6451	30.1831	0.0827575	-0.620957	5.10359	0.000230918	0.0101779
MLXIP	24.1179	11.2462	37.4844	33.0667	31.8102	9.8246	19.3607	13.7117	10.8298	18.405	10.3697	22.3065	20.6467	13.0875	18.0669	38.7643	24.4678	26.1805	25.3181	41.483	50.4879	21.6571	21.7428	35.8967	27.3314	36.4014	41.4365	24.1516	36.1492	32.0276	15.0715	40.1842	66.3289	47.7732	0.122695	-0.732829	4.92143	0.000235665	0.0103544
AXL	0.15661	0.138842	0	2.25455	5.1784	2.91668	0	2.17647	0.257853	2.79176	1.63731	0.39833	0	0.438686	4.65359	3.01815	0.431785	0.132896	0.200937	0.111214	0.221925	0	0	0.245868	0	0	0.293876	0.185781	0.486312	0	0.118673	0.261786	1.1215	0.399776	0.244044	2.26581	1.54765	0.000239976	0.0105108
HAVCR2	86.4486	80.9447	34.601	48.3475	102.828	138.772	62.7286	411.57	79.8055	61.729	51.4844	67.0522	68.3284	46.3545	58.1699	55.8357	50.3749	70.3019	51.6408	32.141	39.8355	56.6328	44.6841	48.8048	83.8163	45.1425	34.4815	43.4728	52.5217	50.2952	34.1779	39.3988	46.1418	47.7732	0.203417	0.857053	6.14875	0.000242117	0.0105714
HES4	2.03593	0.694208	0.411916	1.62828	2.21931	17.6536	0.774427	0.217647	1.80497	1.03399	2.18308	1.06221	0.92586	2.33966	3.55863	0.377268	1.15143	0.132896	0.602811	0.222429	0.443849	0	0.171203	0.245868	0.303682	1.31716	0.391835	0.557344	0.810521	0.355862	0.949387	1.70161	0.160215	0	0.475693	1.98846	1.79102	0.000244892	0.0106593
GSDMD	151.912	165.083	77.7149	157.693	179.025	120.965	146.367	120.576	109.459	171.021	183.197	124.412	124.806	121.516	211.191	191.652	256.768	111.633	144.876	82.1875	88.7699	78.869	133.196	104.002	67.5693	109.444	82.3832	70.2253	141.841	115.655	125.2	113.222	86.8363	147.118	0.0769013	0.528359	7.0599	0.000252933	0.0109411
KCTD2	13.1552	14.7172	17.4378	26.1778	13.8707	12.5878	15.4885	17.6294	14.8265	11.2705	17.1008	10.2238	18.5172	18.9366	16.0138	24.1452	17.4153	21.662	37.7762	27.5812	27.8515	15.1716	26.7077	25.3244	13.5139	24.9062	26.155	18.3923	22.8567	19.9283	19.9371	25.7859	22.4301	23.9866	0.0309718	-0.524879	4.47687	0.00025218	0.0109411
LAIR1	188.871	189.797	164.767	147.923	193.45	183.137	156.628	156.923	161.416	154.064	86.0499	131.714	177.024	106.235	170.677	62.4379	130.543	133.693	130.609	83.2996	69.1295	140.713	124.636	114.329	60.1291	112.317	57.7956	66.3239	122.064	106.64	107.281	79.8447	19.5462	122.731	0.109468	0.622967	6.98699	0.000256692	0.0110354
FBXO8	17.8535	21.2428	12.9067	17.5354	20.1588	50.3511	23.8136	19.8059	17.1472	17.7846	18.9201	24.1654	21.7577	21.4956	20.8043	15.9396	13.961	14.4856	14.4675	12.2336	13.0936	13.3186	14.0387	11.0641	15.9433	15.2072	13.7142	15.6056	18.4799	15.7766	14.4782	13.7438	10.8946	10.794	0.037986	0.565127	4.29513	0.000256407	0.0110354
TRIP6	6.421	5.97019	2.88342	10.396	17.1997	12.1272	9.68034	21.547	6.3174	11.5807	18.7381	13.676	9.07343	8.11569	13.8239	9.05444	8.49177	6.379	5.22436	6.00558	8.32217	4.74836	9.58739	7.86778	6.98469	5.14888	5.28977	5.20188	5.34944	8.06621	5.22163	6.02108	7.36987	5.39698	0.0488128	0.751056	3.42547	0.000259908	0.0111394
HIST1H2BM	0.469829	0.971892	1.09844	2.3798	2.21931	5.37283	2.9041	4.57058	2.4496	8.0651	14.5539	5.44384	1.85172	2.48589	3.96924	0.848854	5.75713	0.531583	0.602811	0.778501	0.887699	0.926508	1.36963	0.737604	2.73314	0.957931	1.37142	1.67203	1.78315	1.18621	3.91622	0.523572	0.961288	1.5991	0.198071	1.44275	2.21489	0.000264931	0.0112248
MRPL27	11.5891	8.74702	6.45336	9.26869	14.2406	34.8466	9.87394	16.7588	8.89593	23.9885	22.9224	11.1532	10.1845	16.8163	29.8377	8.96012	31.6642	10.233	4.01874	9.2308	5.54812	9.84415	5.82091	4.42562	9.11046	5.26862	7.15098	14.3052	6.15996	6.2869	16.3769	10.8641	9.13224	14.3919	0.146553	0.874964	3.87532	0.000265115	0.0112248
MLEC	15.8176	14.3007	19.2228	20.4162	12.7611	12.7413	15.2949	29.1647	11.8612	12.8214	10.1877	11.8171	13.3324	11.3327	10.9496	16.5998	17.1275	17.6751	24.7153	30.0279	23.4131	19.4567	21.2292	19.5465	15.9433	24.6667	21.1591	13.3763	20.9114	25.1476	16.0209	22.9063	24.5128	25.9854	0.0285948	-0.529448	4.36226	0.000264036	0.0112248
ARRDC4	14.2515	16.661	17.987	26.6788	14.9804	7.36845	14.5205	50.2764	16.7604	23.1613	15.4635	10.7549	17.6839	14.4766	14.6451	31.6905	26.7707	25.7818	34.963	46.154	31.9571	18.1827	18.3188	44.9938	13.0583	26.8221	43.1998	27.8672	21.722	28.2317	32.0418	26.8331	71.7762	65.9631	0.156348	-0.802915	4.87283	0.000263801	0.0112248
PTGES	2.50576	1.11073	52.8626	1.25253	0.739771	1.6886	1.35525	73.1293	2.70746	1.03399	1.09154	0.132777	0.833274	12.0639	0.27374	4.33858	1.29535	0.531583	1.00469	1.557	4.32753	0.694881	1.36963	1.72108	2.42946	3.59224	3.13468	3.34406	1.94525	0.355862	0.474694	2.22518	1.1215	2.19877	1.2046	2.22574	2.94413	0.0002714	0.0113943
FPR3	7.83049	1.24957	3.29533	11.398	18.4943	27.4782	13.7461	49.6235	5.54384	24.9191	24.9236	18.3232	7.49946	8.99306	6.15916	8.67717	19.4303	5.71452	1.40656	10.7878	5.10427	6.25393	2.91046	7.49897	21.5614	2.87379	2.64488	9.28906	4.0526	8.42207	2.37347	5.10483	5.4473	7.79563	0.334922	1.20587	3.69316	0.000270692	0.0113943
ALPK1	16.6006	28.046	20.0466	25.4263	41.0573	34.5396	22.652	14.147	13.0216	20.7831	16.1912	28.2814	22.4058	15.6465	34.0807	29.2383	28.6417	11.5619	23.3087	14.013	10.5414	15.4032	16.0931	21.3905	15.4878	13.6505	8.42445	14.3052	15.7241	20.5214	13.6474	21.5973	20.187	14.9916	0.0535016	0.584654	4.47815	0.000271564	0.0113943
GTF3C4	13.9383	16.5222	10.9844	14.0283	10.9116	11.5132	11.0356	10.8823	14.1819	12.4078	13.2804	17.9249	17.5913	18.1323	13.5502	17.9202	11.8021	22.991	19.29	25.2457	13.4264	17.6037	18.3188	15.2438	21.4096	22.6311	25.2733	20.4359	17.6694	22.3007	19.6998	17.5397	15.8613	15.7912	0.0124037	-0.492297	4.24275	0.000275406	0.0115209
H3F3B	4019.23	4492.92	2533.97	2698.94	3714.21	7013.53	5371.81	5703.43	4178.77	11521.4	4745.84	2818.19	3243.38	2871.78	5153.71	2424.04	3518.33	3968.67	3108.09	1543.32	2281.61	2872.29	2628.31	2799.08	6785.78	1828.57	2177.62	2859.73	1747	1792	2372.04	1953.84	2421.32	2973.53	0.154433	0.712167	11.8276	0.000276351	0.0115259
CD300A	187.305	140.924	97.3496	174.101	201.588	294.124	104.548	129.717	105.462	211.76	165.914	198.103	150.915	158.366	182.174	198.726	273.176	141.534	86.4029	121.557	114.513	148.357	102.037	78.4319	125.573	91.9614	87.4771	108.125	110.879	124.789	123.183	135.343	126.409	199.888	0.0825316	0.539559	7.23762	0.000279519	0.0116233
HECTD1	22.2386	26.6576	38.4455	24.9253	20.8985	15.3509	27.6858	23.2882	21.4018	17.0608	16.0093	19.7837	26.8499	18.2786	20.8043	30.936	15.4003	26.1805	34.7621	50.2689	26.9638	30.8064	25.5093	35.1591	31.8866	44.5438	37.4202	29.1677	26.0988	33.3324	22.6666	29.32	34.7666	24.3863	0.0416177	-0.505031	4.89354	0.000288295	0.0119527
NAGK	288.632	326.417	200.466	301.984	456.809	613.73	284.989	142.994	233.357	587.925	440.073	329.817	349.419	223.364	492.87	392.453	538.436	243.199	247.353	304.505	146.914	256.064	325.115	196.94	170.821	202.722	216.097	236.128	266.661	292.875	253.842	267.807	259.227	222.475	0.10159	0.583007	8.27166	0.000291801	0.012038
PELI3	11.2759	9.71892	13.5932	13.0263	7.7676	7.52196	10.6484	4.78823	9.54056	2.68837	8.55042	10.2238	9.62894	10.0167	3.55863	7.734	7.19641	13.9541	13.8647	11.8999	20.8609	10.0758	12.3266	16.719	9.71783	16.6441	9.20811	14.4909	18.9662	15.1835	11.5113	10.3405	10.0935	9.19485	0.0205343	-0.614606	3.71106	0.000292075	0.012038
LCP2	362.552	232.56	591.237	271.548	346.028	391.449	202.706	1020.11	336.627	505.93	421.335	200.36	187.487	515.602	680.382	489.317	492.81	229.91	214.601	286.266	221.37	209.159	185.927	227.92	314.615	243.075	269.092	344.624	157.889	160.257	336.202	359.563	372.82	296.234	0.146783	0.697232	8.45541	0.000294694	0.0121102
HIST1H2BD	256.997	289.763	99.6838	276.683	288.326	776.757	556.232	396.552	442.218	712.417	1301.12	656.846	315.811	580.82	1028.31	200.518	717.195	341.808	203.549	210.974	216.266	261.391	181.647	211.815	347.716	121.777	219.036	403.888	414.662	289.316	641.904	320.164	226.383	183.497	0.234911	0.880014	8.67942	0.000299026	0.0122522
CEACAM1	2.03593	1.6661	2.74611	2.3798	2.77414	7.06143	0.387214	1.95882	1.9339	1.44758	1.45539	0.79666	0.370344	10.894	8.07534	0.848854	2.015	0.664479	0.401874	1.00093	0.443849	0	0	0.245868	1.36657	2.15535	0.587752	2.04359	0.162104	0	2.13612	1.43982	0.320429	0.599664	0.274582	1.6904	1.95755	0.000301261	0.0122847
TRIM21	20.9857	21.2428	10.2979	34.4445	44.0164	86.4257	20.5223	25.247	14.8265	57.3863	49.4833	32.7958	21.3874	42.4794	85.8176	47.5358	80.8877	14.087	14.6684	42.0391	10.6524	17.2562	21.058	13.8915	17.9172	15.6861	15.0856	19.6928	18.3178	22.0635	44.9772	31.9379	23.872	26.3852	0.211504	0.893888	5.08058	0.000301578	0.0122847
TBC1D14	53.2473	69.8374	55.1968	82.9172	64.1752	36.0747	71.0537	21.9823	48.3474	39.8085	55.6687	60.1478	76.7538	43.7224	62.4128	72.6241	59.7302	77.6112	97.0526	68.2857	80.4477	73.0783	83.2048	87.2831	46.1597	92.9193	76.5057	71.7116	95.3172	76.8662	76.5443	66.8863	73.3783	120.932	0.0622022	-0.497181	6.16193	0.000302833	0.0123
SNCA	10.8061	16.7998	10.0233	10.5212	7.7676	8.90354	15.4885	5.00588	7.60666	10.0297	9.82388	14.0743	14.2582	6.6534	10.1284	9.52602	9.64319	16.3462	16.8787	16.1261	14.3141	19.9199	13.1827	13.2769	14.8804	11.2557	13.3224	12.6331	17.183	18.2676	13.7661	13.3511	10.7344	19.1893	0.00898248	-0.531571	3.89398	0.000304567	0.0123345
TXNDC5	14.8779	13.3288	15.6528	14.404	9.98691	6.14037	10.2612	12.8412	10.7009	8.68549	13.4624	12.0827	12.1288	7.89635	9.85466	12.2612	17.8471	14.087	17.2806	18.0167	20.8609	15.2874	17.6339	15.1209	10.9326	20.7153	21.6489	15.2341	14.5894	17.5559	14.3595	18.325	15.3806	18.3897	0.0104137	-0.50417	4.04928	0.000319936	0.0129195
ACOX1	16.444	22.3535	14.829	13.0263	15.1653	9.36407	19.9415	11.5353	19.2101	11.3739	11.0973	18.9871	18.795	12.5025	10.9496	19.2407	13.5293	21.5291	33.7574	21.4644	16.3115	23.9734	18.1476	23.9721	19.5875	21.1942	17.7305	16.7203	18.8041	30.3669	17.5637	21.0738	24.9935	16.3908	0.0238437	-0.502351	4.35932	0.000328816	0.0132398
IRF2	155.357	187.02	95.0154	154.562	184.943	325.286	175.021	94.0234	158.709	233.371	139.354	156.676	173.043	204.281	303.715	190.709	246.981	119.473	153.516	144.023	73.3461	123.11	142.955	87.4061	119.347	138.301	97.077	129.675	154.809	130.483	167.685	149.742	113.432	133.325	0.0834868	0.533558	7.33502	0.000338409	0.013548
ACO1	7.67388	7.49745	8.51294	5.88687	5.73323	2.91668	7.55066	5.87646	9.92734	7.13451	3.45655	6.37328	8.98084	6.87274	2.60053	7.54536	4.17392	12.6251	12.0562	9.56444	9.4318	13.7818	10.4434	8.60538	9.71783	11.8544	12.2448	6.50234	7.13258	16.251	6.64571	10.0788	6.88923	6.19653	0.00991352	-0.64749	3.36708	0.000337866	0.013548
ZAK	14.5647	11.5239	20.1839	10.396	11.4665	10.8992	18.5862	8.27058	13.0216	12.5112	9.27811	17.3937	21.5725	13.3068	7.66473	15.6566	11.5143	18.2067	16.4768	21.5756	11.873	21.5413	17.2915	19.9153	18.9801	22.0324	22.0407	15.7914	21.2356	23.7241	12.8167	17.147	18.7451	26.3852	0.0238514	-0.525065	4.21023	0.000341821	0.0136207
PAQR7	21.4555	25.1303	23.6165	15.0303	9.24714	11.0527	15.8758	10.447	32.3606	9.09908	16.5551	20.3148	19.7208	22.373	5.61168	14.4305	12.6657	25.6489	28.9349	23.7999	31.0695	20.7306	24.3109	22.374	29.1535	40.7121	28.9958	26.5667	35.825	37.1283	20.0558	22.1209	8.97202	15.5913	0.082294	-0.64061	4.56268	0.000342175	0.0136207
HIST1H3B	0.15661	0.416525	0.274611	0.250505	0.369886	1.6886	1.93607	9.14116	1.16034	2.89516	9.64196	1.19499	0.092586	0.731143	1.50557	0.377268	2.30285	0.265792	0.602811	0	0.332887	0.115814	0.171203	0	1.21473	0.239483	0.293876	0.557344	1.13473	0.237241	0.118673	0	0.160215	0.199888	0.519438	2.21633	1.68114	0.000343351	0.0136287
RAB27A	211.58	263.105	198.406	145.418	144.255	72.7634	197.866	102.947	211.311	202.558	166.096	181.506	240.075	113.693	162.328	227.681	174.153	300.345	363.696	263.467	163.448	240.776	260.572	208.004	232.772	249.062	300.047	231.855	228.243	259.068	192.844	222.125	242.725	251.059	0.0727501	-0.493377	7.76302	0.000355681	0.0140384
SEMA3C	4.8549	15.8279	10.2979	5.38586	7.02783	1.07457	11.6164	2.61176	6.3174	4.85974	5.82156	5.17829	8.24015	11.1865	6.70664	8.8658	2.73464	13.4225	16.6778	9.89809	8.76602	15.2874	7.53295	20.407	6.83285	7.54371	17.9264	12.6331	12.1578	9.01518	10.918	10.0788	15.3806	6.39642	0.0761219	-0.761642	3.52873	0.000355145	0.0140384
NM_001270929-T08948	16.6006	38.598	0.549222	9.7697	23.4877	69.8467	4.45296	0.870587	5.54384	2.68837	2.72886	6.90439	10.1845	2.41277	12.8658	7.1681	4.17392	4.51846	7.23373	0.667287	1.7754	3.12697	22.5988	6.8843	0.759205	2.63431	0.489793	0.557344	3.7284	0.948966	0.830714	2.61786	0.801073	0.199888	0.844018	1.81167	3.35832	0.000358911	0.0141166
APOL1	62.9571	55.5367	24.0285	30.9374	63.8053	67.0836	46.4656	21.7647	47.7028	80.2374	32.5643	45.9407	30.9237	37.2152	82.3959	69.323	75.2745	45.8491	72.9401	24.8008	24.3007	26.058	48.6218	27.1684	21.1059	33.2881	23.706	22.8511	29.1787	26.3338	42.129	24.3461	27.5569	26.9849	0.117087	0.667771	5.46835	0.000359683	0.0141166
GPSM2	3.1322	7.91397	3.98186	3.50707	2.40426	2.91668	4.45296	0.870587	3.60994	2.48157	3.63847	2.92109	4.99964	2.99769	1.77931	3.39541	2.73464	5.31583	7.23373	4.67101	5.77004	8.45439	7.19054	6.26963	4.85891	7.30422	7.05302	5.57344	8.59152	7.47311	4.74694	2.74875	4.64623	4.59743	0.00165822	-0.817765	2.76307	0.000362373	0.0141823
SLC27A3	77.8351	63.7283	27.5984	57.3657	93.951	53.2677	49.9505	40.047	65.6236	50.5619	55.8506	67.3178	61.2919	41.0171	72.815	52.4403	75.4184	59.936	45.6127	25.913	35.0641	47.9468	55.1275	43.2728	30.3682	42.8674	26.2529	36.9705	35.9871	60.1407	44.9772	43.4565	27.8774	41.7766	0.060489	0.503508	5.72158	0.000364838	0.0142389
LTA4H	260.442	249.221	222.435	178.61	72.6825	135.856	230.198	237.67	326.313	123.251	167.916	76.081	200.449	283.83	127.563	151.568	162.207	281.872	535.899	226.21	286.616	216.108	380.585	227.428	198.456	330.247	274.97	304.495	182.691	347.915	397.081	233.251	283.099	191.893	0.119875	-0.62268	7.92652	0.000377603	0.014696
H6PD	13.7817	8.46934	26.2253	17.9111	13.6858	7.21494	12.3908	7.39999	9.79842	10.5467	13.0985	14.2071	15.647	14.4766	18.8881	21.3157	20.15	17.808	19.6918	22.5765	26.8529	15.4032	17.1203	26.7996	7.44021	24.3075	21.0611	24.7089	20.7493	19.4538	21.4799	31.807	26.7558	25.1859	0.0571567	-0.598037	4.34742	0.000385157	0.0149484
FCER1A	2.34915	0.416525	18.8109	6.63839	0	0.767547	6.38902	7.18234	29.1374	3.51555	3.27463	3.05386	1.85172	6.87274	0.547481	3.58405	0.143928	3.45529	0.401874	45.1531	17.532	3.93766	16.2643	5.16323	59.0662	32.5697	19.2979	68.3675	2.59367	9.1338	17.9197	6.80644	21.7892	1.39922	0.913123	-1.81327	3.88365	0.000396915	0.015362
HSPA6	33.3579	33.1832	11.5337	44.5899	48.2701	72.1494	23.0392	117.529	22.82	54.0775	87.6872	32.7958	27.8684	82.1074	122.636	58.9482	78.0091	26.7121	41.594	38.0353	16.2005	15.9823	28.7622	19.7924	31.5829	17.0033	10.9714	32.3259	40.2018	30.2483	50.6735	49.0849	24.1924	43.7755	0.218638	0.86856	5.51771	0.000404157	0.0155991
TCP11L2	67.4988	83.1662	58.0802	60.7475	42.3519	61.8642	64.0838	31.9941	28.3638	40.1187	42.2063	69.4422	82.4015	40.7247	25.321	72.6241	49.3674	83.3257	93.8376	79.5183	74.3448	79.1006	86.2865	67.2449	62.8622	66.3367	68.0813	65.0234	131.142	123.01	44.7399	65.3156	77.3837	65.1635	0.0806984	-0.54388	6.10766	0.000405384	0.0156034
KIAA0226	100.857	117.877	101.743	107.091	107.082	122.654	102.031	111.217	75.9377	95.8506	111.337	82.1888	79.5313	87.2985	173.688	131.478	100.03	67.5111	99.062	87.1921	82.1121	56.4012	90.2242	86.5455	75.0095	101.062	71.6078	58.5211	65.8143	74.0193	75.5949	105.5	71.4557	52.5706	0.052648	0.441564	6.57173	0.000416076	0.0159709
STX17	12.6854	15.1337	8.92486	15.0303	19.2341	19.8027	12.778	19.8059	14.5687	21.7137	14.372	12.8793	11.6658	14.9884	23.8154	19.6179	19.7182	8.50533	13.2618	8.4523	9.76468	11.5814	13.5251	13.5227	11.5399	10.657	8.62036	7.98859	10.6989	10.9131	10.5619	15.9689	12.9774	11.7934	0.0160761	0.523185	3.99338	0.000417584	0.0159849
TBX3	0	0.83305	0	1.62828	0.554829	0.460528	1.93607	0.65294	0	0	0	0	2.40724	0	0.27374	0	0	0.132896	3.01406	0.111214	22.3034	2.20046	6.50573	15.2438	0.607364	0.239483	10.5795	0	0	2.13517	0	0.654465	0.160215	0	1.44913	-2.61113	2.06422	0.000421715	0.0160989
SARNP	32.105	34.8493	22.7927	31.0626	42.9067	43.9037	38.7214	69.4293	45.3821	50.9755	49.8471	29.6092	35.9234	51.5456	55.7062	25.6542	43.7542	29.1042	29.7387	24.0223	22.7473	32.4278	27.5637	28.6436	27.1795	23.1101	28.9958	38.8283	29.1787	29.7738	41.5357	27.7493	28.358	29.7833	0.0480563	0.4839	5.24194	0.000424674	0.0161643
ME1	0.939659	2.36031	3.98186	4.00808	1.84943	0.921056	3.87214	4.57058	1.9339	4.44614	2.00116	9.82548	9.53636	0.877372	2.32679	2.54656	2.73464	3.45529	5.82717	3.44765	6.10293	5.21161	4.45129	7.49897	5.46628	8.86086	15.6734	4.45875	22.2083	14.1159	3.08551	4.05768	6.88923	4.59743	0.192178	-1.07757	2.90673	0.000425742	0.0161643
WDR47	19.1064	23.1866	26.7746	18.6626	18.6792	23.3334	22.652	14.3647	17.2762	21.8171	17.1008	20.5804	20.2763	26.9792	22.9942	24.6168	15.5443	26.1805	31.949	23.5775	27.5187	25.1315	28.4198	31.4711	28.698	23.5891	36.8325	24.1516	25.1261	27.6386	23.26	30.7599	37.0096	22.1876	0.0187704	-0.430172	4.73792	0.000435052	0.016473
TMEM184B	15.1912	11.8015	24.5777	14.9051	12.2062	8.44301	10.842	24.1588	10.3141	11.684	17.1008	9.82548	11.851	9.7242	8.07534	19.4293	13.961	17.808	18.0843	22.5765	26.9638	18.0669	15.4083	21.6364	15.3359	21.9127	20.1795	21.3648	17.3451	17.6745	17.6823	18.0632	24.3526	19.589	0.0294063	-0.52179	4.24486	0.000442865	0.0167235
CD300E	877.955	337.663	346.01	476.336	603.838	795.946	298.154	1278.02	535.561	568.176	448.26	438.429	355.252	347.001	493.828	617.305	628.823	553.511	318.083	329.862	271.636	318.719	329.224	314.957	502.898	381.855	231.476	296.693	361.654	311.261	293.835	433.125	362.726	590.669	0.113371	0.592736	8.86724	0.000450854	0.0169793
PSME1	322.46	382.786	320.059	243.115	307.93	386.383	282.085	784.617	421.59	503.448	639.098	392.222	362.474	458.5	590.048	358.499	643.791	245.459	267.246	230.436	224.81	299.378	385.208	233.575	192.686	293.247	235.395	369.333	344.796	181.371	520.264	260.87	320.269	373.391	0.101295	0.56148	8.53498	0.00045869	0.0171818
ANTXR2	43.6941	59.1465	59.0414	46.2182	40.1326	28.0922	54.4035	28.0764	40.8697	26.3667	29.8355	45.0113	55.459	36.9227	32.1645	33.8598	28.3539	53.6899	67.113	62.1689	51.0427	59.9914	49.3066	65.278	57.0922	77.3529	42.9059	54.2481	67.9216	70.9352	44.1465	43.8492	42.6171	34.3807	0.0513862	-0.468169	5.65882	0.000457828	0.0171818
TIMP1	729.645	392.644	616.776	383.022	408.169	538.511	372.887	3211.6	624.262	524.748	799.373	333.137	283.128	675.503	534.615	414.335	619.323	358.952	260.615	268.917	420.436	256.064	278.89	339.175	331.469	502.555	335.019	514.8	457.458	250.171	440.397	378.412	331.965	697.609	0.220205	0.821757	9.06097	0.00047462	0.017731
C2orf47	18.6366	25.8245	10.4352	22.1697	23.1179	34.3861	20.7159	47.2293	26.301	21.7137	49.4833	26.2898	24.9056	28.0028	31.0695	23.8622	28.4978	13.6883	12.86	13.2345	27.1858	14.7083	22.0852	17.3337	15.4878	23.4693	19.5917	22.4795	25.6125	13.1669	20.0558	17.8015	15.701	15.991	0.0592791	0.560679	4.64481	0.000477709	0.0177988
GIMAP7	10.1796	25.1303	1.51036	20.4162	63.2505	195.11	38.1405	13.2765	13.7951	54.9047	74.9526	34.9203	21.6651	71.2133	120.446	31.4076	62.7527	7.84085	22.5049	28.026	2.6631	9.61252	30.9878	8.72831	12.9065	15.0874	6.36731	15.7914	20.263	25.2662	74.4082	29.0583	14.2591	16.3908	0.515096	1.30281	5.23078	0.000485497	0.0180409
RAB10	236.794	235.337	153.096	258.897	321.246	437.041	233.877	186.088	243.929	306.784	360.755	301.27	236.835	396.791	344.776	210.516	297.212	228.581	160.75	185.617	146.137	197.115	185.584	112.362	223.358	196.376	125.485	228.139	238.942	196.555	301.074	218.199	135.221	254.058	0.0799593	0.502064	7.92466	0.000490943	0.0181781
IFNGR2	240.396	273.657	363.31	190.509	227.665	285.681	225.939	425.717	257.724	296.444	295.808	295.826	217.762	246.834	376.53	279.933	299.083	185.523	193.1	203.078	195.959	181.248	217.942	191.531	179.932	254.57	158.105	186.339	247.695	160.494	279.476	270.687	182.965	260.254	0.0559091	0.423446	7.96922	0.000492067	0.0181781
PSKH1	6.421	5.55367	17.0259	11.2727	6.84289	5.98686	7.55066	3.91764	5.67277	4.96314	6.9131	7.56827	8.79567	6.87274	7.39099	15.3737	17.8471	9.96719	9.2431	22.4653	12.9826	9.84415	8.21776	11.0641	8.04758	16.8835	10.3836	16.9061	12.3199	14.1159	17.089	21.7282	17.7838	19.1893	0.0769611	-0.712921	3.75478	0.000493092	0.0181781
WASF2	330.29	324.195	625.426	482.473	276.674	329.891	416.448	139.294	294.855	212.381	223.584	360.489	379.14	351.972	286.333	507.52	318.369	426.463	432.015	585.878	552.592	396.546	631.912	408.633	330.406	692.704	535.05	321.773	689.429	600.458	342.491	656.952	412.072	469.737	0.0966783	-0.544505	8.74563	0.000495664	0.0182248
FCGR1C	3.75864	2.08262	1.09844	4.50909	5.91817	11.5132	5.42099	3.69999	2.4496	0	1.63731	5.44384	2.96275	2.19343	12.5921	3.67837	7.05249	1.32896	2.61218	1.66822	0.665774	0.926508	4.45129	1.96694	1.21473	1.91586	0	0.557344	2.91787	1.42345	2.72949	1.17804	1.60215	3.99776	0.158656	1.21861	2.3802	0.000497696	0.0182515
SKA2	16.2874	16.2445	11.3964	14.9051	18.8642	25.022	17.8118	18.2823	21.9175	23.6783	26.7428	16.5971	14.9063	31.0736	22.9942	14.0532	20.006	12.4922	13.0609	11.2327	9.65372	14.8241	12.4978	10.8182	11.2362	14.2492	11.2652	17.6492	15.0757	7.23586	23.26	15.5763	11.215	14.7917	0.0337667	0.532394	4.21811	0.000499164	0.0182574
FCGR1A	83.473	115.239	38.7201	70.7677	161.085	122.04	93.7057	88.3646	103.141	211.45	187.381	131.051	99.3447	43.9417	236.375	132.138	308.726	57.0123	89.6179	51.9371	19.8623	63.6974	134.395	46.1003	32.3421	43.8253	46.6283	68.3675	109.745	47.5669	87.937	46.7288	34.6064	212.281	0.255451	0.895117	6.69797	0.000504324	0.0183979
SUN1	31.4786	26.6576	33.3652	45.3414	27.0017	13.3553	30.9771	21.9823	32.1027	19.9559	21.8308	35.7169	37.5899	19.4484	19.2987	37.9155	20.8696	41.3306	36.3696	37.4793	41.6109	45.8622	34.7543	35.8967	45.7042	54.9613	41.1426	25.6378	34.0419	48.2786	24.6841	40.4459	38.4515	31.7822	0.0480687	-0.482986	5.15997	0.000506471	0.0184282
CASS4	16.2874	13.19	2.6088	5.63637	2.40426	4.29826	9.48673	12.4059	8.12237	2.68837	4.18425	7.56827	13.5176	7.09209	0.958092	7.45105	0.86357	21.7949	9.04217	12.456	11.4291	17.4878	4.10888	10.5723	13.6657	24.4272	11.2652	11.1469	10.0505	15.1835	10.5619	8.11537	16.9828	7.99552	0.146909	-0.870774	3.58378	0.000525481	0.0190208
MMP9	0.939659	2.08262	1.92228	1.37778	0.184943	0.307019	1.16164	0.435294	0.515706	0.310196	0.181924	0.39833	0.555516	0	0.27374	1.69771	1.15143	1.99344	2.61218	0.333643	11.873	0.579068	1.36963	6.26963	1.21473	8.62138	2.8408	1.11469	1.29683	0.830345	0.35602	0.654465	3.84515	0.799552	0.35826	-1.64925	1.93013	0.000524449	0.0190208
CLCC1	15.1912	14.1618	16.0647	16.1576	13.5008	15.8115	15.8758	10.0118	14.4398	10.7535	13.2804	16.7299	15.1841	13.7455	10.9496	20.2782	12.09	16.8778	20.0937	20.9083	19.1965	20.9623	21.2292	20.53	16.3988	21.6732	19.4938	14.3052	20.5872	24.3172	18.8691	19.5031	20.9881	13.9922	0.00607086	-0.443295	4.25664	0.000529946	0.0191328
TMEM126A	16.1308	28.1849	14.4171	14.1535	22.0082	29.4738	15.4885	28.2941	23.2068	20.1627	37.1124	24.8292	21.7577	24.0546	26.2791	16.4112	17.2714	13.8212	13.0609	12.2336	10.2085	19.225	18.3188	11.0641	14.8804	15.4466	14.7918	22.108	17.6694	11.6248	22.4293	12.1731	13.7785	18.7895	0.0374953	0.518733	4.39835	0.000540572	0.0194662
FAS	20.2027	48.5946	89.7978	26.5535	38.838	81.5134	32.9131	16.1059	29.3952	40.5323	49.3013	50.7207	39.6268	23.6159	48.8627	46.6869	51.2385	17.9409	33.9584	24.1335	23.9679	27.9111	40.7464	27.1684	20.6504	37.5988	27.6243	27.3098	40.8502	24.9104	20.8865	31.2834	20.9881	25.9854	0.101945	0.620308	5.24564	0.000545511	0.0195935
FBXO6	15.1912	15.8279	4.39378	16.0323	20.7136	16.886	12.9717	23.2882	14.6976	17.4744	12.5527	14.7382	13.3324	11.6252	26.2791	21.0327	34.9746	13.8212	12.86	6.56165	10.8743	8.33858	9.92979	12.2934	5.31444	12.2136	7.54282	10.5895	13.7789	8.89655	12.5794	15.8381	8.97202	15.5913	0.0631109	0.634655	4.02196	0.000560136	0.0200159
ADAMTS5	1.72271	3.19336	4.11916	0.626263	0	0	1.54885	0	1.16034	0.310196	0	0.132777	1.57396	1.5354	0.410611	0.754536	0.143928	2.79081	3.01406	7.45137	2.21925	2.66371	1.36963	2.58161	1.21473	1.79612	2.74284	2.04359	1.94525	3.20276	2.61081	2.48697	3.52472	1.39922	0.0105434	-1.29732	1.95621	0.000560102	0.0200159
ATOX1	68.1253	70.8092	49.5673	73.899	88.2177	125.724	71.8281	87.494	60.5955	90.8874	136.625	93.2092	64.5324	66.2416	121.13	59.4197	117.014	50.3675	57.2671	41.3718	60.0306	61.8444	86.1153	47.5755	32.3421	52.4467	45.3549	62.4225	77.81	53.2607	83.7834	50.6556	52.0698	85.9519	0.0778816	0.518748	6.22413	0.000565801	0.0201582
CBL	67.1856	74.0026	183.028	100.578	60.2914	77.9827	67.5688	32.647	75.9377	38.2575	48.0279	73.5583	75.4576	84.3008	75.6892	82.999	58.7227	74.8204	126.59	163.596	132.711	70.2988	124.636	97.7325	66.2027	181.767	118.726	81.1864	121.254	146.615	85.3262	150.003	93.5654	87.7509	0.113126	-0.602866	6.60539	0.000567004	0.0201582
BCCIP	66.8724	77.7513	34.4637	47.4707	66.0246	80.8994	67.3752	60.5058	80.9659	77.3422	65.3106	67.185	65.6435	61.1967	64.329	48.1017	54.8367	44.9188	62.4914	39.1475	38.0601	62.1919	67.9677	44.5021	46.3115	49.3335	45.1589	45.888	40.6881	50.5324	49.9615	38.4826	41.3354	45.7744	0.0381031	0.404783	5.86893	0.00057674	0.0204169
PRRC2B	62.0175	41.6525	64.3963	81.7899	74.532	30.5484	57.8884	39.3941	39.9672	28.1244	34.5655	72.7616	61.5697	27.7103	33.2595	89.4126	30.081	81.1994	62.2905	80.408	96.6482	67.1719	70.8782	87.0373	63.3177	102.139	78.269	47.9316	74.0816	90.389	47.3507	85.7349	76.7428	54.1697	0.0893502	-0.554506	6.03487	0.000577203	0.0204169
PDPK1	38.9958	29.2956	41.1916	45.3414	32.1801	22.4124	36.9789	12.4059	31.4581	10.7535	16.5551	30.5386	35.7382	22.2267	20.6674	28.2951	12.2339	44.3872	52.2436	26.8027	67.2432	43.3143	52.0458	52.9846	29.9127	64.8998	38.5957	23.2227	59.9785	50.7697	27.6509	33.5086	24.3526	25.3858	0.104178	-0.625634	5.21575	0.000579419	0.0204435
TEX261	20.2027	15.1337	24.9896	22.9212	14.9804	15.3509	12.778	18.0647	12.1191	12.0976	20.9212	17.7921	17.4987	20.6182	19.8462	27.3519	29.5053	19.0041	21.0984	29.027	34.5093	22.5836	23.2837	23.8492	15.6396	29.4564	27.8203	22.2938	23.343	25.2662	29.431	30.629	37.1698	38.7783	0.0427723	-0.502693	4.65344	0.000598807	0.0210625
SLC16A5	17.2271	16.9387	9.19947	18.4121	14.9804	10.4386	19.1671	11.9706	14.6976	7.7549	10.3697	15.9332	14.0731	9.28552	8.48596	13.5817	8.34784	24.3199	30.7434	11.3439	24.5227	17.2562	23.1125	26.1849	9.71783	22.5114	16.653	13.9336	24.4777	22.5379	9.49387	17.0161	16.6623	13.1926	0.0442512	-0.557918	4.18455	0.000599977	0.0210625
RTN1	97.4113	78.8621	63.2978	82.2909	27.7414	22.1053	89.6399	25.4647	101.336	23.2647	37.8401	46.3391	80.0869	83.8621	32.9857	46.5926	31.9521	125.321	78.5664	87.5258	108.854	94.0406	88.3409	89.7418	94.597	132.913	85.1261	103.294	94.0204	123.603	92.9213	82.5935	25.3139	56.5683	0.153927	-0.698526	6.2733	0.000602474	0.0210972
EIF2C4	127.794	161.334	236.715	154.061	108.192	98.86	162.049	131.023	149.942	124.285	121.525	123.482	175.543	101.848	131.122	169.11	120.18	148.046	259.41	208.638	162.005	152.295	196.028	232.591	144.249	194.34	211.885	143.052	190.31	199.046	149.291	200.266	194.18	196.49	0.0550768	-0.420793	7.39406	0.000605961	0.0211134
STEAP3	18.48	6.24787	12.7694	13.903	13.3159	3.3772	12.9717	14.147	16.1158	9.51268	8.00464	8.63048	11.7584	8.84683	8.62283	9.43171	10.2189	18.0738	11.6543	22.5765	16.3115	24.8999	10.2722	16.4732	19.4357	18.6797	16.3591	13.3763	8.75362	20.2841	16.9703	13.3511	10.414	16.7906	0.0373855	-0.568688	3.9779	0.000605246	0.0211134
GALNT2	48.7056	38.0426	88.6993	50.602	49.7496	15.3509	37.1725	38.9588	37.9044	46.0124	50.3929	28.547	37.3121	38.385	52.0107	72.6241	79.0166	53.0254	75.3514	93.0865	59.2539	48.2942	50.6762	72.2852	45.2486	68.8513	81.4037	68.7391	48.307	70.1048	66.3384	106.678	96.6094	101.743	0.102415	-0.587093	5.96123	0.00062516	0.0216957
DSTYK	2.03593	2.22147	2.05958	3.38182	0.739771	1.38158	1.93607	1.52353	2.57853	1.44758	1.27347	2.2572	2.49982	1.97409	1.91618	3.867	2.015	3.85398	4.82249	5.78315	2.99598	2.77953	4.10888	5.16323	3.49234	3.4725	3.62447	3.52984	3.7284	6.04966	3.44153	4.05768	6.5688	3.59798	0.00165822	-0.987273	2.37478	0.000625778	0.0216957
OXER1	6.26439	6.24787	10.8471	9.26869	6.84289	1.22807	14.9077	5.22352	8.38022	9.51268	10.9154	9.82548	11.5732	6.21472	5.61168	14.8078	4.6057	13.8212	7.43467	15.7925	16.0895	9.61252	9.07378	13.031	9.11046	12.2136	15.3795	19.507	11.3473	12.0993	11.7487	12.3039	20.6677	11.1937	0.0451029	-0.637941	3.68284	0.000630536	0.0218065
DPH3	40.0921	52.2045	16.7513	32.5657	37.7283	72.7634	40.4638	41.5705	39.3226	31.4332	40.9328	51.5174	50.5519	25.9556	40.2399	29.8985	36.2699	29.7687	36.1687	17.5719	28.8502	36.018	27.9061	28.1519	31.2793	26.3431	19.2979	26.0094	35.0145	31.909	26.1081	17.6706	31.0816	33.1814	0.0508312	0.480035	5.19007	0.000647915	0.0223523
LRRCC1	1.87932	5.55367	2.6088	3.50707	9.0622	5.06581	3.09771	3.48235	3.09424	7.23791	3.63847	6.10773	3.9812	4.02129	9.44405	2.54656	3.45428	1.46185	3.61687	1.66822	1.88636	3.47441	2.56805	1.47521	2.27762	1.91586	1.56734	1.85781	3.56629	1.42345	3.44153	2.74875	2.08279	2.39866	0.00397224	0.931151	2.46206	0.000650864	0.0223987
FGD4	48.0792	51.2326	56.2952	40.7071	56.0377	96.0968	58.4692	53.5411	32.7473	51.4925	45.8448	65.5917	56.0145	48.1823	59.1279	60.3629	41.3074	36.8121	30.7434	50.3801	29.0721	40.8822	47.0809	29.75	44.945	39.3949	34.2855	31.5828	41.3366	44.9573	34.4153	45.6817	55.1138	35.1803	0.045107	0.439272	5.62663	0.000654249	0.0224098
SLC30A5	10.023	9.30239	14.2798	9.14344	8.69231	5.67984	9.68034	4.35294	7.21989	8.78889	12.007	7.16994	8.05498	12.2832	7.93847	16.9771	10.075	9.83429	15.6731	20.241	9.4318	17.372	14.7235	9.34298	10.7807	11.7347	13.6163	13.9336	12.1578	16.3697	16.3769	13.482	14.2591	16.3908	0.0192194	-0.55057	3.79487	0.000654395	0.0224098
IP6K1	8.45693	10.4131	8.92486	12.5253	5.91817	10.4386	7.55066	8.05293	10.7009	6.51412	7.09503	9.29437	9.2586	14.9884	5.74855	11.1294	10.3628	11.429	11.2525	16.3485	16.4224	7.99113	8.04656	18.0713	11.2362	20.2363	11.0693	12.8189	18.642	13.4041	10.7993	14.66	16.3419	11.3936	0.0167275	-0.554738	3.76207	0.000656768	0.0224361
CNP	72.3537	55.9532	35.2875	79.0344	77.676	67.5441	49.9505	60.2882	49.6367	74.8606	89.3246	51.3846	53.1443	61.3429	101.421	67.531	96.8637	52.361	40.9912	41.5942	52.3742	44.125	64.0301	50.0341	37.8084	48.9742	33.8937	54.0623	39.8776	32.6207	70.0173	52.7499	40.6945	62.3651	0.0604478	0.470769	5.91785	0.000665191	0.0226684
TMSB10	5030.15	7719.6	3058.07	3444.2	5192.27	9989.77	6665.69	5659.03	5595.15	5218.53	6084.08	6815.83	7074.4	4429.56	7060.18	3456.81	6397.32	4314.6	5821.15	2586.07	3441.94	4483.61	6708.26	3917.66	2901.68	2706.87	2933.57	5212.84	5610.59	4115.07	4321.97	3161.07	3351.21	3458.26	0.0902493	0.507654	12.2818	0.000673614	0.022844
SPINT2	42.2846	36.5154	62.3367	45.5919	28.2963	24.715	35.0428	44.8352	60.4665	44.875	54.3952	33.1942	45.4597	59.5882	44.346	47.9131	47.4963	43.8556	53.4493	73.2903	47.6028	51.4212	57.6955	54.8286	46.6152	64.3011	55.5426	73.9409	61.1133	55.7517	81.6473	57.0694	59.5999	97.7453	0.0556328	-0.462633	5.79575	0.000673033	0.022844
SRC	35.707	36.9319	65.7693	64.6303	57.5172	40.987	31.5579	89.8881	32.7473	19.2322	23.6501	33.5925	25.0908	27.1985	37.3656	35.7462	39.7242	31.6292	29.5377	11.7887	56.4798	19.8041	31.6726	34.9133	20.9541	38.6765	15.8693	15.4198	30.4756	18.2676	17.3263	29.4509	16.6623	16.7906	0.125751	0.66805	5.15513	0.000678347	0.0229488
GPR77	64.8365	53.1764	28.6968	40.9576	49.0099	74.759	43.3679	29.6	40.7408	47.3566	61.6721	46.8702	38.5158	39.4086	55.1587	39.4245	42.171	39.8688	30.1406	34.0316	32.401	28.8376	26.7077	33.1922	29.7608	38.437	26.057	41.4292	42.6334	30.8414	38.6875	41.3622	29.4795	39.1781	0.0405251	0.432824	5.42645	0.000688571	0.0232385
MASTL	38.0562	42.9021	43.9378	46.7192	43.8315	73.531	38.915	43.3117	23.5936	38.3609	30.5632	24.4309	38.9787	30.05	48.8627	63.0038	42.6028	28.3068	29.5377	22.2429	37.6162	28.0269	43.8281	45.7314	26.2685	27.4208	21.1591	25.452	23.343	20.4028	22.4293	30.2363	38.7719	29.9832	0.0582238	0.494409	5.25074	0.000692705	0.0233216
CCNY	337.651	316.698	371.274	329.54	243.57	98.86	279.375	289.47	449.954	287.448	324.916	298.084	353.771	263.285	233.774	355.104	336.216	431.911	410.916	326.526	386.704	333.659	378.531	349.01	351.057	514.409	480.781	527.619	393.913	360.726	382.01	395.69	431.138	529.703	0.0677874	-0.447122	8.50895	0.000694386	0.023322
PFDN1	82.69	86.4984	29.5207	49.7253	66.3945	103.772	94.0929	144.517	90.7643	73.7232	58.3975	60.6789	68.5136	72.895	53.1057	52.1573	56.9956	71.498	49.6314	31.14	52.0413	64.7398	65.7421	59.9918	47.6781	57.4759	47.314	46.6311	67.7595	39.1448	42.4851	27.6184	36.6892	48.7727	0.0815254	0.527017	6.00711	0.000700563	0.0234731
UGGT1	31.9484	29.7121	32.1295	15.1556	22.563	12.7413	24.0072	11.9706	42.2879	16.2336	13.4624	16.7299	23.3317	18.9366	17.3825	24.994	15.976	36.6793	55.8605	27.0251	21.0828	38.5659	35.9527	38.3554	24.2946	39.9936	36.0488	24.7089	23.9914	41.0428	22.7853	30.2363	22.5903	21.388	0.0724099	-0.557727	4.86186	0.000703671	0.0235208
S100A11	2010.71	2499.29	684.331	1471.47	1950.96	1945.88	1899.86	3508.9	1994.11	1724.69	2964.81	1543.53	1626.09	2074.25	2075.77	1056.73	1511.39	1848.71	1503.61	888.27	1311.24	1300.12	1458.48	1103.09	1187.85	1202.32	863.114	1770.68	1613.58	1143.39	1893.67	858.527	911.461	1448.39	0.100338	0.534011	10.671	0.000713862	0.0237213
TPMT	39.4657	35.1269	33.5025	60.8728	55.8527	96.8644	38.3341	39.1764	40.8697	64.314	66.766	46.3391	38.5158	64.1212	103.063	45.6495	45.9131	29.6358	29.9396	23.6887	43.9411	43.6617	40.404	38.1095	23.3835	36.7606	31.2488	44.0302	38.7429	35.1117	45.6893	51.5719	34.2859	37.7788	0.0769256	0.530531	5.58358	0.000714576	0.0237213
RPS4X	1794.44	1419.66	2437.17	1525.83	1084.32	1334.46	1478.96	2830.93	1999.26	1518.51	1861.26	1847.19	1965.79	2085.73	1269.47	1662.24	2015.28	2307.2	1581.58	2826.52	2765.51	2574.54	2223.76	1539.87	2215.97	2486.55	2064.48	2688.07	2864.54	2007.77	2504.84	2140.23	2617.59	2949.95	0.0665763	-0.434662	11.0392	0.000714764	0.0237213
PGA4	1.40949	0.555367	3.29533	0.375758	0.184943	0.614037	0.58082	1.52353	1.9339	0	1.45539	1.06221	3.24051	1.5354	0.410611	0.943171	0.143928	4.51846	2.21031	1.89065	1.99732	5.21161	1.02722	0.491736	2.42946	1.4369	0.685711	2.78672	6.97048	8.18483	1.7801	2.48697	4.3258	1.19933	0.0910402	-1.28514	2.0259	0.000729264	0.0241452
STAC3	18.6366	14.8561	7.00258	11.1475	29.221	14.2764	12.1972	19.1529	11.4745	13.1316	18.5562	12.2155	8.6105	11.4789	17.1088	12.6385	16.2639	14.4856	12.659	6.11679	7.98929	11.5814	10.101	16.842	3.18866	6.46604	6.36731	10.7753	8.91573	7.47311	9.49387	6.02108	10.5742	11.5935	0.0475769	0.607947	3.82411	0.000740076	0.0244452
ZFHX3	69.2215	40.1252	124.261	54.4849	43.0917	21.7983	42.9807	55.4999	59.693	50.8721	38.204	49.2602	63.514	60.4655	47.494	56.5902	25.7632	70.0361	56.6642	81.8538	69.2405	77.8267	57.5243	83.841	77.8945	113.515	94.4322	81.7438	70.3532	67.0207	76.9003	85.604	90.2009	46.9737	0.0884294	-0.539514	6.0836	0.000753876	0.0248423
ADAM19	21.2989	20.4097	13.044	27.0546	20.3437	5.67984	17.6182	8.05293	10.7009	8.16849	4.00232	16.9954	19.4431	6.06849	7.39099	23.9565	19.4303	28.5726	24.7153	18.3504	34.7312	22.1204	25.8517	37.8637	12.1473	23.4693	25.3713	10.7753	22.3704	24.5545	16.8516	19.7648	13.458	42.9759	0.122947	-0.701438	4.42325	0.000773144	0.0254173
IPO5	29.4426	29.5733	67.417	19.1636	19.2341	18.4211	17.231	31.1235	33.6498	15.7166	26.5609	21.9082	23.5168	38.6775	22.0361	27.5406	23.0285	26.845	43.6033	53.3829	35.286	33.7017	40.2328	34.6674	21.8651	47.6571	55.5426	42.3581	35.6629	45.0759	39.2809	41.4931	40.0537	35.78	0.0765644	-0.545986	5.16772	0.000778693	0.0255397
ATP13A1	38.3694	39.1533	40.0932	45.5919	50.4894	43.7502	30.2027	50.9293	27.4613	45.8056	69.3129	27.0864	29.1646	48.3286	83.0802	60.08	67.0706	19.9344	30.1406	38.5914	34.0654	26.2897	28.2486	35.6509	22.6243	31.013	27.0366	32.5117	29.9893	18.9793	47.1133	50.0011	37.9709	31.5823	0.0799512	0.541915	5.39043	0.000793853	0.0259759
SOCS7	4.8549	4.85946	11.9456	10.2707	6.84289	5.67984	6.00181	4.57058	3.60994	3.51555	4.91194	5.04551	7.12912	5.41046	5.0642	6.97946	4.46178	9.4356	7.43467	8.4523	17.532	7.75951	8.90257	12.2934	6.07364	13.1716	10.3836	9.10328	9.56415	9.37104	4.74694	9.94787	8.33116	6.19653	0.015774	-0.651035	3.2865	0.000798866	0.0260789
TNFAIP6	6.73422	17.0775	352.6	7.51515	8.50737	8.75003	7.93788	6.74705	5.67277	11.2705	2.91078	10.7549	12.4065	4.6062	16.1507	23.7679	12.09	9.30271	10.0469	7.89623	10.9853	11.6972	5.82091	14.6291	13.5139	10.178	4.99589	2.78672	16.5346	5.93104	7.95112	17.4088	11.0548	10.1943	0.812862	1.58269	4.49262	0.000806778	0.0262758
WDFY1	62.3307	55.1201	74.2823	71.7697	104.308	109.913	48.0145	167.588	61.6269	114.566	107.881	61.2101	36.4789	101.629	202.705	127.705	171.706	43.9885	57.0661	64.0595	64.2472	37.0603	46.2249	63.5569	50.1075	62.2655	68.4731	67.6244	50.9007	39.6193	82.0033	89.5308	84.9138	87.3511	0.141244	0.652512	6.38933	0.000823719	0.0267651
ZNFX1	54.3436	34.7104	119.593	55.6121	60.8462	67.5441	22.0712	105.776	39.3226	62.0392	48.0279	38.638	30.8311	49.279	95.1248	85.4513	74.1231	38.5398	40.7902	40.9269	40.1684	27.9111	32.015	47.0837	36.7455	47.2979	32.4243	35.4842	28.8545	20.2841	39.5182	63.2213	61.0418	39.1781	0.1206	0.623198	5.73281	0.000826386	0.0267895
TANK	35.2372	67.477	66.0439	60.1212	56.0377	142.457	60.2117	47.8823	44.6086	33.3978	40.9328	48.4635	59.1624	64.9255	60.3598	37.1609	41.3074	40.9319	47.823	25.0233	44.052	35.0915	40.2328	33.9298	44.7931	55.7995	23.9999	25.6378	65.4901	38.0773	37.5008	43.8492	22.9107	23.5868	0.0928721	0.56185	5.64079	0.000832295	0.0269186
MB21D1	29.286	34.155	19.9093	38.4525	35.509	98.3995	30.5899	37.8705	27.4613	48.5974	39.8413	51.6501	28.4239	62.3665	76.3736	40.0847	70.0931	22.991	26.7246	24.356	31.5133	16.0981	41.9448	25.3244	20.6504	27.0616	26.2529	26.7525	43.1197	22.8938	51.9789	33.3777	26.5956	30.383	0.10985	0.614527	5.31282	0.000841237	0.027145
HMOX1	600.599	368.625	207.194	390.162	528.752	723.95	431.356	2841.81	522.152	512.961	426.247	404.703	377.01	858.435	438.259	229.945	435.959	432.975	236.503	313.514	341.209	281.659	286.252	211.692	510.793	316.477	217.076	501.795	387.591	333.443	397.081	472.524	188.733	428.16	0.228628	0.799452	8.91332	0.000848065	0.0272807
RBM34	24.1179	28.6014	26.6373	27.5556	26.4468	43.5966	25.1689	49.8411	32.1027	36.4997	39.4774	27.7503	19.3505	41.4558	45.1672	31.0303	39.8681	20.5989	24.1124	24.356	22.3034	19.5725	24.1397	25.4473	26.5722	21.9127	29.1917	27.3098	18.1557	21.7076	32.9912	23.9534	22.9107	23.9866	0.0379003	0.450128	4.95644	0.00084935	0.0272807
TMEM51	2.97559	0.416525	0.961138	6.01212	6.10311	7.21494	3.87214	36.347	1.54712	4.65294	4.18425	3.58497	1.75913	2.48589	9.17031	2.45224	9.06748	3.98688	0.401874	1.77943	1.22059	1.50558	2.56805	3.07335	0.759205	2.15535	0.979587	2.60094	1.62104	2.01655	4.15357	4.18858	0.160215	4.39754	0.419986	1.38965	2.63181	0.000860599	0.0275786
RPL5	617.826	946.484	962.1	433.249	324.39	296.119	673.752	1006.83	1538.35	553.183	573.787	616.349	927.989	1055.77	481.236	429.991	457.404	914.19	981.577	846.676	989.34	1409.91	1114.19	835.951	797.166	1384.21	1168.35	1495.54	1172.82	919.666	1266.24	693.995	912.262	839.13	0.125691	-0.589612	9.78902	0.00086562	0.0276761
KCNJ2-AS1	0.15661	1.24957	97.4869	1.00202	1.66449	1.99562	1.54885	0.435294	1.03141	0.930588	1.81924	1.06221	0.648102	0.950486	1.09496	1.69771	1.29535	0.797375	5.02343	1.44579	1.10962	1.62139	3.25286	1.22934	0.759205	0.83819	0.587752	0.928906	0.810521	1.77931	1.06806	0.785358	1.76236	0.199888	1.35285	2.18484	2.63203	0.000869125	0.0277247
FCGR1B	12.842	38.1815	3.56994	12.901	36.2488	25.4825	19.7479	9.14116	18.3076	24.4021	14.5539	39.0363	19.8134	6.87274	24.4998	15.2794	31.6642	12.4922	24.7153	5.00465	4.43849	14.1293	20.202	7.86778	4.09971	7.54371	5.19181	6.50234	27.2335	7.23586	7.95112	6.15197	4.48601	20.9882	0.235368	0.906813	4.16856	0.000875387	0.0278608
RPA1	26.1538	27.9072	44.8989	23.5475	19.7889	15.3509	31.3643	17.6294	37.3887	22.0239	26.3789	19.7837	27.0351	29.4651	24.9104	26.5974	22.165	25.7818	40.1874	39.8148	30.7366	27.1004	30.6454	32.5775	25.6611	49.2137	42.8079	37.5278	28.2061	36.5352	40.2303	45.0272	34.2859	34.1809	0.0418474	-0.453226	5.04992	0.000881608	0.0279951
CACNA2D3	14.0949	46.6508	17.7124	15.7818	7.21277	12.1272	22.652	4.57058	22.0464	5.68693	11.4612	11.5516	32.868	22.5192	5.20107	20.7498	6.04499	20.0673	32.9537	32.697	27.6296	32.0804	36.2951	19.4236	22.017	24.1878	26.8407	28.2388	25.4504	29.1807	26.3455	23.5607	30.9214	16.3908	0.138919	-0.715239	4.57588	0.000886592	0.0280895
NM_001270928-T08947	1.87932	4.02641	0.137305	1.62828	3.14403	13.8158	1.93607	0	0.902486	0.620392	0.545771	1.59332	1.20362	0.292457	1.91618	0.943171	1.29535	1.19606	0.602811	0	0.221925	0.926508	2.39685	0.983472	0	0.359224	0.0979587	0	0.972625	0	0.237347	0.130893	0.160215	0	0.444678	1.85211	1.73612	0.00088927	0.0281106
SCARB2	43.2243	31.5171	47.3704	46.0929	69.3536	63.0923	27.2986	52.2352	38.8069	46.2192	87.8692	41.8247	30.0904	48.3286	71.3094	39.7075	79.5923	31.7621	22.304	47.1549	33.9545	36.9445	32.015	32.2087	20.4985	47.1781	19.3958	43.6586	33.7177	26.6897	46.9947	24.7388	14.7397	57.7676	0.100523	0.582664	5.48484	0.000906693	0.0285967
CCRL2	18.9498	20.9651	30.8937	10.396	14.0557	28.8597	22.652	43.5294	12.6348	17.5778	10.1877	12.8793	11.5732	11.8445	9.17031	12.4499	10.9385	17.808	12.659	5.22708	9.87565	11.2339	9.41618	12.1705	28.0906	8.86086	7.3469	7.24547	8.91573	5.33793	7.1204	5.36661	10.0935	9.39474	0.133906	0.746447	4.01301	0.00091	0.0286363
TCF7L2	106.181	70.8092	109.158	78.1576	55.2979	134.781	82.0893	58.3293	111.264	80.9612	108.608	75.5499	54.348	218.904	126.605	50.9312	74.267	68.0427	40.9912	48.7119	59.1429	47.831	58.3803	38.4783	73.6429	86.573	38.3998	91.5902	86.2394	43.771	82.478	95.0283	26.115	39.9776	0.132973	0.629902	6.32377	0.000913956	0.0286513
NRG1	20.8291	30.1286	0.961138	30.3111	16.275	21.3378	13.5525	11.7529	38.678	29.055	9.82388	20.4476	31.3866	8.04257	6.15916	19.9009	21.0135	45.1846	26.7246	2.00186	47.27	45.8622	70.707	21.8823	24.5983	41.5503	48.6855	20.2502	64.3554	35.7048	42.9598	9.94787	19.0655	59.5666	0.279446	-0.931118	4.92577	0.000914576	0.0286513
GNGT2	25.5274	8.88587	35.974	25.301	20.3437	57.566	14.3269	30.4705	23.3357	39.1881	45.1171	22.8376	13.7027	60.5386	59.6754	21.41	49.7992	16.612	8.23842	22.3541	19.0855	14.3609	9.92979	13.031	16.7025	17.9612	13.8122	30.6539	13.1304	12.6924	35.3647	35.6029	16.9828	25.1859	0.176656	0.767639	4.8169	0.000921718	0.0288104
TAF1A	5.01151	5.55367	7.00258	7.01414	4.99346	14.7369	8.5187	2.17647	2.96531	11.7874	8.00464	8.63048	6.11067	12.9412	14.0976	6.60219	6.33284	3.85398	3.21499	7.22894	1.33155	2.77953	3.76647	3.68802	5.76996	3.4725	2.8408	4.83031	5.67365	6.76138	6.76438	6.67554	3.36451	3.19821	0.0567789	0.787932	3.03758	0.000936233	0.0291988
SDC3	2.97559	0.83305	1.64767	13.7778	13.1309	21.3378	7.16345	4.78823	5.41491	5.48013	9.46003	8.49771	1.48138	2.70523	6.56977	5.56471	13.6732	2.25923	1.80843	1.77943	11.0962	2.31627	6.84813	3.31922	1.36657	5.74759	1.86121	2.78672	5.83575	0.355862	2.13612	1.57072	1.76236	1.99888	0.279119	1.1421	2.87681	0.000942078	0.0292374
C21orf7	88.6411	74.6968	22.6554	24.1737	86.1834	153.663	179.861	25.0294	37.1308	68.3465	41.4786	252.408	21.6651	61.2698	93.4824	66.2106	125.937	55.4176	43.4024	20.1298	19.5294	29.9957	53.5867	105.354	12.2991	20.9547	25.2733	13.1905	142.165	13.4041	47.232	19.8957	22.5903	30.9826	0.397026	1.06802	5.99991	0.000940595	0.0292374
VPS26B	35.3938	33.1832	35.974	34.4445	35.694	16.272	29.041	23.9411	51.8285	22.0239	33.1101	21.1115	29.9053	33.9982	23.8154	24.8997	33.5353	37.2108	73.342	31.8073	53.151	40.998	38.8632	49.1736	15.3359	64.8998	43.4936	46.4453	46.1997	40.6869	42.129	27.8802	42.9375	35.5801	0.0659678	-0.503506	5.29101	0.000943748	0.0292374
KIAA1429	16.1308	16.3833	12.6321	17.5354	12.946	15.3509	14.3269	6.31176	19.5968	9.82287	12.5527	17.9249	16.0174	16.3045	12.0446	16.4112	10.3628	18.6054	27.3274	24.5784	12.4278	22.1204	17.4627	20.53	15.0323	20.4758	17.7305	17.0919	21.2356	27.2828	18.7504	21.0738	17.143	12.7928	0.0193776	-0.460294	4.25646	0.000948629	0.0293235
HIST1H2BG	3.60203	1.11073	1.51036	3.25657	0.739771	6.44739	4.64656	2.17647	5.02813	17.2676	15.4635	5.84217	1.57396	5.19112	8.34909	1.50907	7.05249	5.84742	0.803748	0.778501	1.22059	1.50558	0.51361	0.860538	2.73314	1.79612	3.33059	2.22938	3.24208	2.25379	4.27224	3.14143	1.44193	1.5991	0.265899	1.21998	2.54798	0.000951696	0.0293534
RNASE2	40.4053	25.8245	10.0233	106.339	232.658	64.1669	65.6327	145.17	60.9822	94.8166	123.89	54.5712	76.6612	19.1559	178.205	40.5563	114.999	44.3872	26.5237	23.355	42.2766	70.7621	58.2091	44.2562	55.5738	36.8803	17.9264	47.7458	43.4439	70.698	36.0767	61.5197	30.4408	71.5599	0.27226	0.884077	6.09673	0.000962544	0.0296226
ENTPD7	9.70981	7.91397	16.3394	10.0202	8.50737	4.9123	8.32509	11.9706	7.09096	3.61895	5.82156	5.84217	8.6105	5.92226	7.93847	9.14875	5.32535	9.7014	12.86	16.0149	11.651	13.4344	7.53295	10.0806	9.41415	12.9321	16.3591	12.4473	8.59152	10.6759	7.00173	11.3877	15.5408	17.9899	0.0255388	-0.578226	3.60616	0.000973518	0.0298945
NM_001171944-T18890	12.842	8.3305	15.6528	16.9091	12.0213	4.29826	14.3269	9.14116	14.6976	7.23791	8.36849	16.5971	15.647	7.677	6.98038	14.1476	6.33284	17.4094	14.2665	18.5728	15.2018	20.1516	20.0308	15.2438	16.247	22.0324	15.4775	11.1469	13.2925	16.9628	11.0366	15.0527	14.7397	14.3919	0.0232583	-0.51283	3.98029	0.0009843	0.0300933
SULT1B1	43.8507	52.0656	34.7383	28.3071	18.1244	58.18	24.9753	7.83528	26.9456	13.235	16.0093	24.5637	27.2203	20.9838	20.8043	40.2734	20.15	48.9057	65.7064	54.3839	33.6216	40.4189	59.2364	35.1591	24.7501	31.3722	30.1713	28.2388	41.3366	39.8566	27.2949	55.7604	51.7493	63.1646	0.11832	-0.626621	5.24754	0.000983492	0.0300933
GZMB	1.87932	0.138842	1.92228	1.62828	0.369886	0.921056	1.35525	23.9411	2.19175	10.1331	15.4635	5.04551	0.740688	2.48589	2.46366	0.377268	1.58321	1.46185	1.00469	0.889716	0.110962	0.347441	0	0.61467	2.5813	3.23302	0.587752	2.41516	1.13473	0.118621	4.03489	0.523572	0.801073	0	0.733861	1.75607	2.25648	0.00100884	0.0303783
FAM26F	113.385	113.572	45.7227	88.4283	114.295	256.821	121.391	107.517	0	123.251	156.454	123.217	26.2018	158.658	254.989	90.2614	204.666	85.452	90.6226	29.9167	103.195	41.2296	98.7843	43.7645	26.724	0.119741	34.8733	71.8973	52.5217	14.3531	117.487	34.0322	46.1418	34.1809	0.4932	1.1749	6.52272	0.00100694	0.0303783
SHISA4	2.81898	3.88757	1.23575	2.50505	5.1784	8.44301	2.71049	3.69999	3.60994	2.58497	8.91426	4.11608	1.57396	4.0944	5.20107	0.565902	3.74214	1.99344	3.21499	0.889716	1.88636	1.38976	2.05444	1.10641	0.911046	2.39483	0.881628	4.08719	3.07998	2.60966	1.89877	0.523572	0.640859	1.5991	0.0242181	0.99743	2.2858	0.000998603	0.0303783
USP22	84.7259	98.1611	117.122	113.354	82.1146	64.6274	104.16	154.747	84.4469	59.8678	84.5945	63.9984	93.1415	80.7182	70.8988	95.0716	76.8577	100.868	133.02	129.12	177.762	94.8513	108.201	132.031	133.772	130.039	124.897	107.753	112.014	117.435	83.4274	125.134	109.907	100.544	0.0550426	-0.415022	6.75093	0.00100262	0.0303783
MPRIP	37.5864	69.1431	38.4455	30.3111	42.5369	20.5702	56.146	24.3764	33.0052	28.6414	29.2897	44.7457	44.0709	27.7103	23.4048	34.9916	20.7257	59.936	62.4914	40.3708	62.2499	45.7463	43.3144	61.467	57.3959	53.6441	62.6935	45.7022	43.7681	52.6676	35.8394	44.5036	48.0644	23.7867	0.0667455	-0.490918	5.49542	0.00100415	0.0303783
APP	42.7545	33.1832	73.8703	27.3051	26.0769	7.67547	30.009	31.9941	49.121	39.2915	14.372	24.0326	36.0159	24.7858	26.9634	46.5926	35.6942	56.4807	46.2155	56.1633	36.7285	47.831	35.2679	54.3368	43.2747	53.5244	89.3383	50.9041	27.5577	50.7697	42.2477	47.6451	58.7988	54.1697	0.107338	-0.592721	5.47449	0.00100746	0.0303783
MICALCL	9.5532	6.52556	11.5337	4.50909	2.95909	0.767547	4.64656	5.87646	8.38022	5.68693	6.36733	4.64718	5.2774	5.99537	6.15916	7.35673	2.73464	7.70796	8.43936	6.78408	8.10025	5.21161	6.16332	10.9411	8.95862	14.8479	13.6163	12.0758	7.45679	6.40552	10.0872	12.1731	13.6182	5.39698	0.0341025	-0.676558	3.27587	0.00100055	0.0303783
TBC1D13	13.3118	20.4097	19.6347	17.9111	17.7545	14.4299	18.0054	5.22352	11.6034	8.0651	13.0985	12.6138	21.3874	10.6747	15.4663	22.4475	15.5443	18.6054	30.3415	24.6896	21.0828	14.4767	33.0422	22.1281	12.9065	23.7088	26.5468	10.4038	26.2609	28.7062	14.3595	26.4404	24.0322	14.7917	0.0556803	-0.540375	4.37667	0.00101795	0.0305866
TRPS1	66.2459	72.753	69.3393	70.2667	65.4698	38.5308	71.6345	55.0646	79.6766	55.5251	37.6582	69.1767	74.0688	48.3286	50.5051	91.6762	46.057	88.9073	79.1692	74.5137	75.1215	84.3123	77.0415	94.4133	91.8638	87.7704	85.322	78.5855	72.7848	89.7959	68.7119	101.966	77.5439	58.5672	0.0456562	-0.397422	6.22714	0.00103042	0.030895
MAZ	75.9558	62.3399	82.6579	73.7738	55.113	31.0089	56.5332	60.2882	104.044	52.3197	90.7799	56.4301	68.884	63.0245	54.4744	59.4197	52.8217	78.6743	83.9917	85.3015	112.627	74.3523	80.6368	88.1437	59.8254	120.22	99.0362	109.983	77.4858	89.3214	89.9544	70.4205	70.8149	78.556	0.0567229	-0.430314	6.29547	0.00104813	0.0313586
DYNLT1	96.6282	125.652	65.0828	96.5697	137.597	297.655	105.322	142.994	94.1164	140.415	157.728	116.047	95.8265	95.6335	234.732	122.141	180.918	96.3495	131.212	72.7343	84.8862	84.3123	117.274	88.3895	53.1444	83.34	109.322	94.9342	111.528	57.7683	123.064	84.9496	92.1234	91.149	0.0996216	0.535316	6.87563	0.0010644	0.0317117
PRKD3	28.6596	43.0409	70.1631	35.8222	33.6596	25.4825	29.8154	44.3999	40.354	38.1541	25.2874	32.7958	38.7009	36.8496	43.3879	59.797	34.5428	34.9516	68.1177	65.7277	38.0601	47.0203	57.0107	53.5992	46.1597	45.382	83.5587	46.2595	49.2797	51.1255	42.3664	80.761	76.102	38.7783	0.0709937	-0.496124	5.62526	0.00106447	0.0317117
NM_001122848-T18037	5.63795	3.05452	3.29533	7.76566	8.32243	7.21494	4.25935	3.04705	2.83638	6.92771	7.09503	7.16994	4.81447	6.79963	10.1284	8.58285	14.5368	4.91715	1.80843	4.89344	3.55079	5.0958	3.76647	3.07335	3.18866	2.63431	1.6653	4.45875	2.75577	4.98207	5.815	4.58126	2.08279	4.19765	0.0279256	0.781013	2.85498	0.00107059	0.0318262
SNRPG	19.1064	19.9932	12.2202	13.1515	21.4534	46.0528	12.5844	31.1235	17.2762	22.0239	34.7474	28.547	25.276	30.5618	25.0473	13.5817	26.9146	16.8778	11.8553	11.8999	11.3182	19.225	15.9219	9.22005	8.5031	17.123	13.2244	23.2227	21.8841	12.4552	26.9389	14.5291	13.2978	15.5913	0.0786442	0.58623	4.44214	0.00107977	0.0320307
IL15RA	13.7817	13.3288	16.0647	20.9172	31.0704	18.2676	16.4566	10.0118	14.4398	23.9885	27.6524	14.871	13.9805	19.4484	31.7539	25.6542	38.7167	11.0304	20.4956	12.3448	14.5361	10.7707	18.6612	13.6457	8.80678	20.2363	11.853	10.5895	10.861	8.18483	15.9022	12.0422	14.0989	18.3897	0.0691961	0.579227	4.27716	0.00108655	0.0321636
FRS3	2.66237	4.9983	3.70725	5.0101	5.91817	3.3772	9.68034	2.39411	4.51243	5.37673	6.9131	9.16159	7.96239	6.79963	4.10611	5.37607	6.76463	5.58163	7.0328	7.11772	7.76736	7.75951	14.8947	9.71179	4.85891	8.62138	10.8734	7.43125	10.6989	11.9807	6.52704	8.63894	10.8946	6.19653	0.00840696	-0.631063	3.20271	0.00108932	0.0321776
NM_004839-T08667	0.939659	1.52726	1.51036	1.75354	1.2946	2.30264	2.51689	1.30588	0.902486	0.516993	1.27347	1.46054	2.31465	0.877372	0.821221	0.282951	1.15143	2.52502	1.80843	3.00279	2.77406	2.08464	4.62249	3.93389	5.1626	0.957931	5.19181	6.13078	0.810521	4.74483	1.30541	3.7959	0.961288	2.39866	0.00165822	-1.13901	2.0892	0.00110203	0.0324844
PI4K2B	14.7213	14.7172	7.5518	12.2748	19.7889	24.715	9.68034	12.8412	7.34881	10.1331	8.73234	16.066	12.3139	8.11569	13.5502	14.4305	11.946	11.6948	14.2665	2.89158	7.98929	11.2339	14.2099	9.58885	7.74389	6.58578	6.26935	3.71563	11.8336	8.77793	5.57765	8.37715	6.40859	4.79731	0.0458297	0.606326	3.66989	0.00111833	0.0328607
CRIM1	3.28881	1.80494	3.02072	2.6303	2.5892	0.767547	2.51689	1.30588	1.54712	1.65438	0.181924	1.32777	3.14792	0.292457	1.64244	1.60339	2.73464	5.44873	3.01406	3.22522	3.77272	7.87532	8.73137	2.45868	2.73314	2.75405	4.60406	0.371563	1.94525	5.10069	1.18673	9.68608	2.40322	2.99832	0.0611901	-1.05506	2.32476	0.0011195	0.0328607
RRM2	1.72271	1.6661	0.961138	0.250505	1.10966	0.767547	0.774427	3.2647	0.515706	2.48157	5.63964	0.929437	0.46293	0.0731143	0.821221	0.660219	3.45428	0.930271	0.401874	0	0.332887	0.347441	0.171203	1.10641	0.759205	0.598707	0.391835	0.185781	0	0.118621	0	0.130893	0.320429	0	0.0502391	1.79522	1.5637	0.00112584	0.0329774
ZNF702P	1.5661	2.08262	0.961138	0.751515	12.3912	11.5132	3.09771	1.30588	0.38678	22.7477	2.54693	0.39833	0.092586	2.33966	3.55863	0	7.6282	1.06317	0.803748	2.78036	0.110962	1.85302	0.342407	1.22934	0.911046	0.239483	2.93876	1.11469	0	0	2.96683	0.261786	0	2.59854	0.759271	1.80974	2.25818	0.00114638	0.0335088
EXOSC9	14.0949	27.0741	9.33677	21.2929	14.9804	33.0045	19.1671	17.847	13.5373	17.888	20.9212	22.1737	20.9244	17.0356	18.0669	23.0134	18.7107	11.2961	17.2806	13.2345	12.9826	18.8776	13.3539	14.5062	13.5139	11.7347	13.4203	12.8189	16.5346	15.6579	11.0366	9.81698	15.3806	13.5924	0.0222351	0.469135	4.23204	0.00114908	0.0335176
CPM	19.263	18.4659	20.1839	15.6566	12.5761	9.51758	16.6502	21.1117	23.8514	17.1642	10.7335	10.091	17.9617	13.1606	8.89657	24.994	12.3778	29.5029	30.7434	21.798	16.6443	31.7329	21.914	23.9721	20.3467	14.6084	24.6856	24.8947	18.8041	22.6566	14.8342	20.1575	24.0322	17.1904	0.0369595	-0.482036	4.42013	0.00115434	0.0336009
USP30-AS1	2.34915	0.416525	1.92228	2.75556	5.91817	6.6009	2.51689	0	3.09424	2.68837	7.6408	4.24885	1.66655	3.0708	1.50557	0.471585	2.87857	0.531583	0.803748	0.889716	1.22059	1.62139	2.05444	0.983472	0.303682	1.79612	0.489793	2.22938	1.94525	1.54207	1.54275	0	0.160215	1.99888	0.0538882	1.20991	2.03525	0.00116593	0.0338677
EPB41L3	233.975	189.241	372.922	229.463	272.236	196.185	234.071	437.905	315.225	276.591	295.99	164.909	178.969	291.507	414.306	251.072	224.96	230.84	198.325	190.733	234.796	167.119	177.538	270.086	122.688	235.292	199.052	225.167	212.032	137.956	167.092	220.555	182.965	166.107	0.0730014	0.44747	7.8936	0.00117882	0.0341712
SH2B2	41.5016	19.7155	38.8575	45.7172	46.6056	63.8599	25.9433	85.0999	39.4515	46.0124	54.0313	22.8376	22.4984	45.5502	49.6839	26.0315	58.291	28.5726	15.2712	19.2401	44.9397	13.8976	25.1669	38.2325	22.7762	36.8803	28.2121	36.0416	31.7724	17.9117	34.534	16.3616	10.8946	46.7738	0.12555	0.634116	5.23649	0.00118793	0.034333
VTA1	20.8291	29.9898	8.23833	19.1636	28.1113	45.4388	22.2648	12.8412	23.0778	21.5069	15.6454	26.8209	20.2763	19.814	23.1311	18.2032	21.3014	20.2002	16.8787	13.2345	11.5401	20.499	19.0036	15.6126	15.0323	11.7347	9.99178	11.1469	16.5346	20.1655	14.9528	14.9218	15.5408	14.3919	0.0458776	0.509884	4.3898	0.00118932	0.034333
IFITM10	12.3722	8.74702	13.3186	14.404	6.84289	9.51758	12.1972	377.835	39.5804	28.3312	7.27695	6.37328	7.31429	8.26192	9.03344	8.2999	8.6357	15.8146	9.2431	2.3355	6.65774	6.71719	8.04656	12.1705	65.7472	11.6149	6.1714	7.98859	4.86312	6.04966	3.44153	3.7959	4.80644	7.79563	0.933027	1.63466	4.62096	0.00119335	0.0343666
IRF7	323.556	340.44	79.088	345.447	456.809	516.098	281.311	18.9353	236.967	287.138	336.923	252.807	232.761	183.517	51.3263	30.4644	194.447	144.325	122.17	55.7184	193.851	101.453	235.062	211.324	120.258	158.178	81.1098	102.18	107.475	67.9697	54.5898	7.85358	5.4473	159.111	0.453005	1.10192	7.50728	0.0011954	0.0343666
LDLR	237.42	125.235	140.052	121.62	325.314	142.917	130.297	90.5411	41.9011	100.71	94.6003	113.922	99.3447	19.9602	139.334	126.951	117.014	150.571	82.7861	32.697	72.1255	113.845	70.707	123.18	163.533	57.8351	29.2896	59.45	35.6629	45.7876	42.6037	27.6184	70.6547	50.5717	0.239313	0.80621	6.68039	0.00120745	0.0345827
FAM135A	27.8765	42.6244	39.8186	37.3253	26.4468	38.2238	35.43	15.4529	39.9672	27.4006	16.3731	31.3353	38.3306	32.4628	37.6393	42.6313	23.3164	41.8622	45.0099	47.5998	43.4972	50.8421	42.116	37.6178	40.6934	46.1004	45.1589	35.8558	52.846	43.4152	35.602	42.0167	42.2967	32.182	0.0353484	-0.402265	5.32363	0.00120787	0.0345827
ADA	27.5633	11.1073	50.2538	34.3192	20.5287	71.5353	17.8118	56.3705	35.5837	32.674	52.394	30.0075	16.3877	111.134	52.5582	9.33739	33.9671	11.6948	7.0328	14.6803	29.8489	8.10695	11.813	8.48245	15.1841	22.6311	9.69791	46.6311	31.4482	15.1835	51.5042	35.7338	10.5742	11.9933	0.303305	0.94114	5.00167	0.00122438	0.0349125
LOC283070	24.2745	13.0511	44.6243	30.3111	15.5352	12.4343	19.9415	31.5588	22.6911	15.5098	26.7428	18.7215	21.4799	36.2647	15.1926	27.7292	19.2864	21.5291	23.1078	46.0428	38.8368	29.6483	26.5365	26.3079	30.5201	52.327	40.1631	35.4842	29.0166	36.2979	26.8202	52.619	31.5623	26.1853	0.0790803	-0.546161	4.95127	0.00122257	0.0349125
NOA1	32.4182	27.7683	38.9948	31.8142	29.221	18.2676	28.8474	43.5294	39.4515	39.2915	36.2028	34.1236	26.2944	40.2129	27.6478	38.4814	41.7392	40.1345	39.5846	55.7184	43.1643	39.2608	38.0071	34.0527	39.4787	45.861	53.7793	49.6036	37.7703	40.331	44.3838	42.6711	54.7934	48.7727	0.0334018	-0.392185	5.37427	0.00123129	0.0350378
FAM72A	6.10778	6.52556	6.31605	4.7596	9.98691	4.9123	4.64656	9.14116	4.51243	8.37529	10.9154	6.50606	6.38843	4.97177	10.1284	10.6578	5.46927	3.98688	4.62155	4.78222	2.77406	4.74836	6.16332	3.68802	5.61812	2.99353	6.36731	3.52984	3.24208	2.96552	4.03489	4.05768	6.72902	3.59798	0.00165822	0.675234	2.96496	0.00124206	0.0352009
PPA1	90.8337	96.2173	99.2719	139.406	141.296	124.803	168.051	184.347	199.449	203.799	153.362	171.282	90.4565	119.323	156.169	121.103	106.795	99.1403	105.492	94.1986	108.854	126.932	126.348	97.3637	99.4559	106.33	102.269	112.212	141.841	62.7504	107.993	73.6928	99.1729	80.7548	0.0631925	0.428328	6.95708	0.0012418	0.0352009
HIST1H2BK	43.5375	34.0162	26.5	16.9091	71.5729	80.4389	35.43	79.6587	38.9358	64.4174	73.6791	55.2351	19.2579	47.4512	40.9242	22.5418	40.7317	32.4266	36.5705	18.7952	15.7567	64.9714	35.7815	21.7593	27.3314	14.7282	17.7305	43.287	27.5577	19.8097	43.5531	20.6811	25.1537	24.3863	0.149548	0.67604	5.32554	0.00124998	0.0353537
MAGED2	14.0949	14.3007	18.9482	10.2707	14.2406	24.2545	9.48673	28.0764	16.2447	19.8525	25.8332	15.2693	13.9805	26.248	26.0053	13.7703	20.8696	9.5685	10.8506	12.456	8.76602	11.2339	12.1554	8.11364	9.41415	10.4175	11.0693	16.7203	11.3473	10.6759	18.0384	17.147	14.7397	18.7895	0.0480727	0.542598	4.13944	0.00125938	0.0355476
RNF25	12.059	18.8825	8.23833	12.2748	18.4943	28.7062	16.8438	20.2411	13.2794	20.9899	13.8262	18.456	17.8691	24.3471	22.5836	16.3169	20.006	11.5619	14.6684	11.5663	10.5414	10.8865	15.2371	12.2934	14.1212	10.2978	10.5795	7.61703	10.861	17.2	16.9703	13.2202	12.9774	13.7923	0.0255687	0.484778	4.1239	0.00128798	0.0362815
ZNF398	5.95117	5.69251	7.00258	9.89495	6.65794	7.82897	8.5187	2.82941	5.15706	7.03111	6.73118	7.83382	6.48102	11.6252	10.1284	11.601	7.91605	7.57506	12.0562	12.456	12.5387	6.25393	13.5251	12.9081	7.28837	10.4175	12.0489	8.17438	10.3747	9.25242	11.63	21.3356	12.0161	12.3931	0.0210157	-0.581582	3.53609	0.00129347	0.036363
UBXN7	19.1064	19.4378	36.9352	22.5455	15.7201	15.8115	19.3607	25.0294	19.4679	17.7846	15.2816	17.6593	16.5729	22.8117	18.0669	28.1065	22.4528	23.7884	29.5377	33.1419	28.7392	20.0357	27.2213	31.717	31.4311	22.0324	35.3631	29.9108	22.6946	26.571	19.2251	29.5818	34.2859	25.9854	0.031116	-0.430811	4.7324	0.00130535	0.0366233
RIPK3	22.082	17.7717	8.92486	20.7919	22.1931	39.9124	13.3589	8.48822	10.9588	19.9559	14.5539	26.8209	18.1469	12.7219	19.5724	19.2407	30.8007	16.8778	15.0703	11.7887	9.76468	12.9711	14.7235	10.3265	9.2623	8.14241	7.64078	8.9175	19.7767	19.2166	11.274	13.7438	10.0935	14.5918	0.0705282	0.590863	4.17578	0.00130858	0.0366403
ATP5A1	140.636	194.795	160.373	122.121	150.543	117.281	145.786	137.335	232.197	121.287	181.56	162.784	175.358	195.581	128.658	133.647	164.654	171.701	282.317	194.514	132.933	245.061	244.821	154.282	155.182	198.531	225.011	210.676	254.828	244.715	221.089	170.161	156.37	203.086	0.0543441	-0.390037	7.5272	0.0013165	0.0367882
BTN3A3	47.2962	54.2871	13.7305	18.6626	73.0524	94.2547	49.3697	20.2411	28.7506	37.1201	48.7556	59.484	33.4235	20.1064	29.4271	43.4802	43.6103	39.3372	50.4352	23.4662	11.4291	32.1962	40.7464	28.1519	22.928	23.1101	18.0244	15.2341	30.4756	31.5531	11.986	24.477	20.9881	20.3886	0.147212	0.669817	5.1847	0.00133405	0.0372042
CLEC4F	20.3593	7.08092	0.274611	5.0101	4.25369	51.8861	3.87214	3.91764	7.73559	4.75634	18.1924	4.24885	2.59241	27.8566	0	1.22612	4.74963	6.2461	1.00469	0	2.99598	1.85302	3.42407	0.737604	8.65494	5.98707	1.1755	7.24547	1.45894	3.55862	7.47642	0.130893	0.480644	3.79787	0.738387	1.52678	3.11717	0.00134687	0.0372981
PCNX	51.9945	75.391	74.145	54.3596	48.64	42.5221	70.8601	58.1117	32.1027	25.9531	36.7486	59.7495	71.106	34.2906	33.3963	73.6616	39.1485	69.1058	82.3842	70.0651	92.5426	63.2342	64.3725	106.092	61.4956	70.2882	65.0446	54.6197	88.8331	73.4262	42.4851	71.0749	90.6815	49.3723	0.0717021	-0.473694	6.00868	0.00134063	0.0372981
NR2C2	15.3478	17.3552	28.8342	27.5556	10.9116	15.965	16.6502	17.847	11.3455	11.3739	8.55042	16.9954	17.7765	12.7219	13.0027	23.9565	16.4078	15.0172	24.3134	30.0279	29.7379	18.4144	21.4004	24.5868	20.4985	31.2525	22.6285	11.5184	30.3135	27.52	12.9354	31.9379	25.4741	23.5868	0.0546807	-0.514671	4.48463	0.00134473	0.0372981
CYBRD1	84.0995	49.7053	77.8522	46.8445	27.1866	23.4869	67.7624	65.947	83.1576	82.5121	59.671	103.3	99.3447	52.4961	44.0722	84.1308	38.5728	72.5611	74.1458	112.327	54.9264	65.3188	85.0881	64.4174	101.278	105.372	129.11	112.026	128.711	155.749	62.1848	112.83	115.675	59.1669	0.118711	-0.577313	6.36747	0.00134809	0.0372981
SRSF8	15.661	16.5222	10.9844	18.0364	11.2815	10.5921	16.0694	11.9706	20.2415	12.8214	17.6466	14.871	18.332	13.8917	13.2764	11.318	9.78712	15.6817	18.6871	18.7952	25.7433	19.225	27.2213	14.3833	16.3988	25.1457	22.0407	17.4634	17.183	27.8759	18.8691	15.5763	17.143	12.3931	0.0191741	-0.448413	4.25368	0.00135805	0.0374994
SERPINE1	1.40949	0.138842	0.823833	1.00202	1.47954	0.614037	0.968034	77.047	1.16034	0.310196	0.363847	0.39833	0.555516	0.219343	0	0.188634	0.431785	0.265792	1.40656	0.444858	1.33155	0.926508	0.342407	2.58161	3.49234	0.359224	0.783669	0.185781	0.486312	0.474483	0.237347	0.261786	0.320429	0	1.79048	2.46378	2.32809	0.00136612	0.0376478
PA2G4P4	0.939659	0.277683	1.51036	1.75354	0.739771	0.767547	0.968034	0.217647	0.128927	0.310196	0.363847	0.132777	0.740688	0.0731143	0.13687	2.35793	0.287857	0.664479	2.61218	1.557	5.21523	0.579068	1.88324	6.63844	0.759205	3.35276	3.91835	0.185781	2.26946	2.49104	0.474694	0.654465	2.72365	0.399776	0.0870186	-1.48741	1.78837	0.00137967	0.0379464
SEC24C	28.8162	20.9651	44.6243	42.2101	32.9198	25.4825	30.2027	36.7823	21.6597	21.1967	24.5597	26.9537	31.9422	27.7103	33.2595	43.3858	31.5203	31.4963	47.2202	51.6035	47.27	33.4701	36.9799	45.8544	30.8237	43.1069	37.6161	28.9819	37.1219	45.0759	33.8219	57.3311	40.3741	45.7744	0.0403196	-0.415742	5.26053	0.00139173	0.0382027
CCDC90B	7.04744	8.74702	5.21761	9.14344	12.3912	25.7896	10.4548	10.0118	9.02486	13.5452	12.1889	15.8004	9.07343	14.3304	13.9608	7.82832	14.105	9.03692	5.4253	7.6738	4.21657	7.99113	7.53295	3.68802	7.13653	8.62138	5.97548	8.36016	11.1852	6.88	9.61254	8.90073	7.04944	10.3942	0.0365238	0.594368	3.55958	0.00139992	0.0383524
H1FX	431.773	431.242	596.73	521.176	397.072	418.006	587.79	494.493	806.822	1015.27	632.731	307.245	416.174	460.913	692.563	229.945	716.907	494.24	348.827	181.391	474.919	260.465	299.435	441.087	659.294	209.787	227.264	451.82	372.515	358.709	471.371	226.314	135.061	422.763	0.139101	0.596483	8.82645	0.00141353	0.0386495
ADCY9	10.3362	5.55367	18.1243	10.7717	9.61703	6.14037	6.96984	11.5353	6.3174	9.61608	13.4624	10.2238	8.88825	12.795	12.0446	15.5623	9.35534	13.0238	9.84591	19.4625	13.9813	10.8865	8.04656	13.1539	17.9172	11.2557	18.2203	17.6492	7.45679	16.3697	18.8691	24.0843	24.3526	18.3897	0.0540195	-0.577968	3.92442	0.00143985	0.039292
ZNRF1	5.95117	3.47104	6.86527	8.39192	3.69886	1.07457	4.25935	4.13529	7.09096	4.96314	5.09386	4.24885	7.40688	5.70292	3.42176	5.75334	5.6132	9.4356	5.62624	4.44858	13.5374	7.52788	4.45129	7.25311	6.68101	11.1359	6.95507	10.0322	5.67365	7.94759	7.35775	10.4714	8.33116	8.59519	0.00437416	-0.636515	3.11354	0.00146918	0.0400144
MRPS27	20.6725	17.3552	32.2668	17.9111	13.6858	20.5702	18.0054	18.5	34.2945	29.1584	18.5562	23.1031	25.276	32.6821	18.2037	24.3338	25.6192	25.1173	21.5003	37.7017	22.1925	33.4701	23.4549	19.1777	35.6826	33.4078	38.6937	33.8122	33.2314	30.3669	35.958	31.9379	33.4849	38.1786	0.0425727	-0.446353	4.87856	0.00147701	0.0401494
KCNJ2	0.939659	2.36031	75.7926	2.6303	3.14403	13.6623	2.32328	1.08823	1.28927	1.44758	4.73002	4.11608	1.2962	3.5826	6.02229	5.75334	6.6207	1.46185	2.61218	2.00186	1.22059	1.50558	3.59527	1.22934	1.06289	0.718448	1.27346	1.48625	4.53892	2.96552	6.40836	6.54465	3.68494	2.19877	0.746154	1.56759	2.8929	0.0015012	0.0406315
SHFM1	120.59	144.812	127.557	114.857	168.298	162.106	191.283	240.5	188.491	225.202	338.742	124.943	118.695	215.102	291.67	102.334	182.933	118.676	127.193	117.109	90.4343	120.909	127.889	85.9309	136.505	98.9064	108.636	197.485	96.6141	97.269	235.685	111.39	103.979	130.527	0.104522	0.525703	7.28526	0.00150108	0.0406315
CEP85L	23.1783	26.5188	20.0466	29.4344	19.6039	10.8992	15.8758	7.39999	21.5307	17.7846	11.6431	27.2192	21.9429	19.3022	17.6563	14.4305	7.05249	31.895	44.809	20.9083	35.286	25.5948	23.4549	24.218	15.7915	25.2654	37.1263	18.3923	35.9871	27.8759	17.2076	44.2418	15.2204	17.1904	0.0851912	-0.57246	4.64238	0.00150347	0.0406315
MIB1	27.7199	43.0409	40.7797	26.6788	20.1588	18.7281	38.7214	15.8882	26.9456	17.7846	18.7381	33.7253	30.9237	21.7149	19.2987	38.0098	19.7182	32.6924	44.2061	41.9278	35.0641	37.6394	44.1705	39.3389	32.0385	50.4111	42.0243	22.4795	38.5808	40.331	21.3612	41.7549	32.5236	29.7833	0.0536624	-0.460784	5.10014	0.00154266	0.0416101
NOL9	17.3837	17.3552	24.9896	31.1879	17.3846	16.272	22.0712	12.4059	19.9836	18.0948	20.0116	26.4226	21.5725	29.1726	23.1311	20.0895	14.2489	26.5792	28.3321	32.5858	33.2887	23.1627	20.5444	24.5868	26.2685	27.4208	29.2896	23.5942	22.6946	30.8414	26.4642	23.9534	35.7279	26.785	0.0250799	-0.404699	4.71636	0.00156236	0.0420602
PTPN6	389.958	507.466	405.6	339.184	393.004	469.278	465.431	392.417	370.148	471.291	481.734	361.02	421.544	554.864	636.173	301.532	510.801	301.674	394.439	313.291	312.581	264.402	349.768	322.579	395.09	281.392	309.745	386.797	287.573	310.786	449.06	473.571	263.553	305.829	0.0539338	0.372689	8.62594	0.00156947	0.0421705
GBE1	7.20405	9.44123	9.61138	5.38586	5.73323	5.98686	7.93788	8.05293	8.89593	6.72091	8.73234	7.83382	8.79567	4.89866	4.51672	7.1681	5.46927	8.10665	13.2618	11.6775	8.32217	12.2762	8.21776	9.46592	7.74389	11.9741	13.6163	8.9175	11.1852	13.9972	9.73122	8.76983	10.5742	9.39474	0.00165822	-0.539099	3.452	0.00157443	0.0422224
CCDC75	4.07185	4.9983	5.90414	2.75556	4.80851	3.99124	7.35706	5.22352	4.3835	4.03255	6.9131	5.17829	3.88861	8.62749	6.84351	4.4329	4.89356	8.23954	5.62624	10.2317	5.10427	12.7395	5.1361	5.65496	11.8436	3.59224	9.99178	12.8189	3.56629	9.1338	12.9354	7.33001	8.01073	6.99608	0.0232031	-0.654956	3.13819	0.00160073	0.0428457
MRPS18A	39.3091	43.7351	30.8937	30.6869	42.7218	63.5529	45.1104	54.6293	38.1623	52.6299	44.3894	34.9203	37.4047	33.5595	51.8738	41.4995	59.0106	34.0213	39.5846	31.6961	25.9652	31.1538	35.0967	30.2418	38.7195	24.9062	39.3794	29.725	28.3682	32.5021	34.89	30.629	43.4182	33.7811	0.0341826	0.384752	5.35637	0.00162316	0.0433629
ISCA2	15.9742	28.1849	10.2979	22.1697	24.9673	53.1142	21.684	23.0706	23.5936	34.225	54.3952	45.808	28.7017	34.6562	44.2091	20.9384	30.081	13.9541	15.874	16.3485	16.6443	19.4567	27.0501	11.3099	18.5246	17.2428	16.8489	24.5231	29.503	18.7421	36.6701	23.5607	11.0548	22.3875	0.100985	0.587889	4.7806	0.00164309	0.0438116
BLOC1S1	152.068	136.343	112.179	131.014	150.728	280.615	117.326	279.241	143.882	206.901	250.327	179.116	159.618	203.916	304.263	116.199	296.204	113.094	86.4029	97.3126	131.047	111.76	146.721	105.477	88.827	107.408	99.428	190.797	185.285	84.2207	197.473	135.474	112.15	214.48	0.110274	0.5333	7.35464	0.00166313	0.0440982
TMEM175	20.3593	16.9387	25.9507	20.6667	22.0082	23.7939	19.5543	30.2529	11.9902	16.6472	22.7405	17.9249	16.8506	24.274	25.8685	18.3918	21.5892	17.6751	18.8881	20.241	16.5334	12.2762	12.3266	19.5465	16.0952	11.2557	15.5754	15.9772	11.3473	14.3531	19.4624	13.2202	13.458	14.5918	0.018064	0.421462	4.35359	0.00166331	0.0440982
STX4	126.228	154.392	116.847	110.849	142.221	95.6363	166.115	258.129	102.11	141.139	139.899	93.4748	103.419	103.164	149.325	139.023	139.035	106.184	124.38	98.2024	85.552	84.4281	97.5859	110.395	145.919	89.6863	107.657	91.2186	77.6479	88.0166	88.4117	112.044	110.228	82.3539	0.0607439	0.410895	6.91308	0.00166214	0.0440982
DUSP5	127.48	71.3646	158.725	50.3515	60.1064	73.6845	112.873	60.0705	87.67	110.947	67.4937	45.1441	40.1823	58.7108	92.6612	68.9458	90.9627	126.251	59.2764	22.9102	52.2633	24.4367	54.6139	63.0651	71.3653	43.4661	19.8856	86.9456	14.9136	21.8262	40.1116	42.2784	68.0912	32.7816	0.182742	0.696683	6.08883	0.00167203	0.0441617
PINK1	27.8765	29.0179	16.4767	15.7818	17.0147	15.6579	28.073	18.9353	26.9456	19.3356	18.5562	17.9249	25.6463	26.5405	15.1926	26.9747	24.7557	36.5464	30.9443	26.5803	27.4077	22.5836	18.8324	32.0858	34.7716	25.8641	27.2325	33.2548	19.4525	34.6373	25.3961	29.8436	32.844	29.9832	0.028909	-0.408616	4.78727	0.00167014	0.0441617
LYSMD2	14.7213	14.023	14.1425	14.7798	16.8298	31.0089	12.0036	10.8823	10.9588	11.9942	27.4705	14.0743	12.6843	21.0569	24.7735	9.80897	14.3928	12.2264	4.21968	12.3448	10.6524	14.0134	8.73137	9.34298	4.25155	14.8479	2.93876	12.6331	13.1304	7.71035	20.5305	9.16251	9.45266	10.9938	0.0786993	0.618291	3.95382	0.00167585	0.0441792
COLEC12	1.87932	1.24957	1.64767	0	0	0	0.193607	0.217647	1.28927	0.310196	0.363847	0.265553	0.370344	0.365572	0.13687	0.0943171	0.143928	3.85398	2.00937	1.89065	1.10962	5.90649	0.342407	0.245868	0.759205	1.55664	2.25305	2.9725	0.486312	0.474483	2.01745	0.654465	0.320429	0.599664	0.0646749	-1.4846	1.62971	0.00169404	0.0445747
LOC729852	15.1912	31.2394	13.3186	12.901	21.2684	29.7808	18.9735	15.6706	16.3737	26.1599	25.4693	20.4476	18.795	22.8117	22.7205	16.4112	20.4378	14.8843	18.2853	12.7897	11.873	18.2985	19.346	11.6787	14.2731	12.5728	14.204	15.9772	16.6967	13.2855	20.5305	10.8641	12.8172	14.3919	0.0247039	0.445787	4.31418	0.00169731	0.0445767
ARHGAP19	3.44542	2.77683	7.13989	3.63232	4.25369	2.45615	3.48492	3.91764	3.35209	2.58497	1.81924	3.31942	3.33309	3.29014	3.42176	4.52722	4.31785	4.78425	6.83186	5.67194	4.66042	4.2851	4.10888	6.1467	3.64419	5.86733	5.28977	3.71563	7.13258	7.94759	5.45898	7.33001	9.45266	9.19485	0.00165822	-0.726074	2.77983	0.00171772	0.0450282
USP34	11.9023	13.6065	36.7979	11.5232	17.1997	11.9737	11.81	11.7529	13.1505	11.1671	8.73234	12.2155	13.1472	10.6747	14.9189	23.6736	9.35534	15.1501	24.5143	26.6915	17.3101	20.7306	16.4355	26.3079	18.0691	20.2363	26.8407	15.2341	17.3451	25.7407	10.7993	29.7127	26.9161	17.1904	0.067496	-0.553432	4.31332	0.00173651	0.0454356
SERPINB10	4.8549	11.6627	14.9663	2.3798	4.06874	5.06581	4.06574	4.35294	1.80497	7.7549	4.36617	2.12443	10.3696	2.85146	9.58092	6.79083	6.33284	13.1567	12.0562	5.67194	4.10561	10.3074	13.5251	14.6291	11.0844	3.95147	11.3632	12.0758	11.6715	9.25242	5.22163	4.58126	11.8559	22.5873	0.124397	-0.773173	3.37517	0.00175457	0.0458221
SRSF1	116.518	112.601	96.9377	115.733	95.2456	61.2502	126.425	45.7058	97.3395	70.3111	96.7834	85.5082	121.751	76.9163	85.5439	110.445	127.089	121.865	112.525	154.143	119.063	133.533	125.492	90.3565	120.714	142.732	103.053	101.437	116.877	175.084	121.878	140.71	106.543	169.705	0.0596564	-0.406438	6.84742	0.00176254	0.0458589
TGFBI	616.416	554.534	991.346	555.996	576.097	358.291	622.059	809.646	1037.34	799.375	531.581	491.672	657.731	525.473	635.625	709.264	516.846	702.089	714.532	950.661	882.15	930.678	678.479	886.108	728.989	908.598	1055.99	878.56	552.451	888.113	682.253	924.105	1149.86	1004.64	0.071122	-0.417579	9.57643	0.0017616	0.0458589
CCDC58	6.57761	8.19166	5.21761	5.26061	11.4665	22.5659	11.81	6.74705	14.4398	10.2365	12.5527	11.0205	8.24015	16.3045	13.2764	4.05563	4.89356	6.77769	6.63092	7.34015	6.21389	7.41207	5.99212	4.30269	6.52917	5.74759	6.56323	8.54594	3.8905	4.86345	12.342	4.18858	4.16558	4.79731	0.0639081	0.675922	3.36832	0.00179933	0.046729
FCGR3A	493.477	93.857	402.58	160.824	176.435	1212.57	239.492	363.905	304.138	375.027	658.018	255.728	147.489	1074.56	528.045	208.346	764.547	155.355	46.6174	236.664	174.988	39.4924	101.352	54.5827	309.756	279.476	78.4649	415.964	208.79	146.141	371.685	674.099	98.532	227.473	0.42783	1.02655	8.3793	0.00181901	0.0471351
LOC100505549	13.7817	15.6891	4.943	7.01414	10.7267	15.965	9.29312	6.74705	13.0216	9.82287	13.0985	13.1449	12.4991	8.84683	11.7708	8.39422	7.19641	10.7646	6.83186	6.78408	4.66042	7.87532	12.3266	4.05682	7.89573	7.06474	5.28977	7.61703	6.97048	7.35449	9.25652	6.28287	6.72902	4.59743	0.0118432	0.551554	3.46768	0.00182171	0.0471351
ZNF652	48.3924	49.983	40.2305	48.4727	39.2079	33.772	54.9843	20.2411	67.0418	32.674	22.7405	45.808	56.1997	45.9158	39.8292	46.7813	29.9371	54.6202	67.3139	54.8287	53.8167	62.7709	62.1468	73.7604	51.9296	71.4856	50.5467	42.7297	67.7595	75.2055	38.0942	54.1897	48.7053	34.1809	0.0556584	-0.426948	5.70426	0.00182778	0.0472046
CLU	10.023	0.971892	6.45336	24.6748	72.4976	70.3073	6.00181	16.9764	3.35209	142.07	38.204	6.10773	3.24051	3.80194	40.5136	8.01695	146.951	4.38556	2.41124	3.00279	0.554812	0.926508	8.73137	5.65496	2.12577	2.0356	2.44897	6.68813	27.0714	1.54207	10.4433	4.84304	2.08279	85.752	1.21524	1.80041	4.64718	0.00184713	0.0476165
IMPDH1	90.3639	70.3927	117.396	155.188	69.7235	45.7458	71.6345	42.8764	72.4567	55.3183	85.1403	77.6744	90.0862	69.6779	77.4686	100.542	111.544	75.4848	117.146	110.102	168.33	68.7932	116.418	124.778	60.1291	134.829	113.632	101.437	145.57	134.397	94.82	128.406	107.023	146.518	0.0872879	-0.482738	6.6703	0.00185057	0.0476174
EIF4E	94.9055	77.3348	49.43	65.1313	76.9362	136.009	60.0181	189.57	84.189	90.0602	100.604	83.251	76.8464	100.532	87.0495	56.4959	78.297	85.8507	51.038	52.8269	49.7111	92.535	70.707	44.9938	74.4021	67.7736	52.3099	65.7666	62.0859	45.669	94.464	46.7288	47.9042	62.565	0.0846378	0.483251	6.29546	0.00187255	0.0480943
SLC50A1	40.0921	50.2607	42.1528	41.9596	50.3045	55.5704	55.3715	62.247	51.8285	52.1129	57.6698	44.4802	42.6821	48.9866	44.2091	40.6507	53.5413	38.1411	45.8136	32.697	37.2833	38.9134	45.0265	34.6674	26.4203	41.191	34.7753	37.342	48.6312	34.6373	41.773	34.8175	36.5289	48.3729	0.0232142	0.331513	5.53502	0.00188576	0.0483447
AKR1B1	24.5877	15.8279	37.2098	19.9152	24.5974	14.2764	20.7159	41.7882	35.3259	18.7152	19.8297	14.7382	27.3129	23.9815	17.1088	26.5031	25.4753	26.4463	28.1312	33.4756	33.8435	38.5659	32.3574	33.1922	24.5983	32.6894	34.6774	35.1127	17.3451	41.9917	48.3001	25.0006	48.2246	27.9843	0.0601334	-0.475022	4.95206	0.00189967	0.0485232
PFKFB2	3.91525	6.38672	15.9274	8.14142	3.14403	5.98686	9.48673	6.74705	5.93062	2.79176	2.72886	6.50606	6.01809	8.77372	4.65359	6.69651	4.17392	5.31583	16.2759	13.9018	12.3168	7.41207	10.101	7.49897	11.8436	11.4952	10.5795	5.20188	12.6441	8.89655	6.64571	11.1259	8.33116	7.79563	0.0393613	-0.634162	3.35378	0.00189902	0.0485232
DHRS9	21.4555	21.1039	3.29533	6.88889	38.4681	31.9299	13.3589	10.0118	20.1125	18.405	18.9201	19.7837	8.88825	5.77603	23.5417	3.67837	13.0975	11.8277	7.63561	10.1205	3.32887	17.7195	11.1282	4.30269	13.9694	4.19095	1.95917	12.4473	2.43156	11.8621	20.2931	4.58126	2.08279	2.59854	0.282317	0.937288	3.85972	0.00191452	0.0487243
UNC93B1	181.667	139.675	167.238	190.634	185.313	150.9	116.938	153.223	161.287	224.789	255.603	131.051	124.065	205.159	248.42	164.206	288.864	120.669	120.16	143.244	127.94	112.571	124.465	137.809	98.2412	149.677	126.661	175.006	104.881	103.437	195.811	124.872	87.7976	203.886	0.0759633	0.441912	7.33549	0.00191425	0.0487243
C1orf162	65.1497	54.5648	62.3367	72.897	94.5058	104.079	86.9294	129.717	67.2996	131.11	94.0546	58.5545	54.348	89.9306	128.247	78.0002	109.242	52.6268	50.4352	62.3913	62.3608	62.1919	59.4076	67.8596	58.307	46.6991	53.6813	81.9295	59.4922	39.1448	84.3768	52.8808	82.3503	89.35	0.0767191	0.462223	6.28469	0.00193338	0.049115
ZNF593	20.2027	12.4957	9.33677	13.402	19.0491	27.6317	13.9397	37.4352	23.4646	35.7759	30.5632	14.6054	14.3508	26.1018	24.7735	10.1862	24.8996	14.087	6.63092	11.0102	12.4278	17.8353	12.669	8.72831	19.8912	13.411	13.7142	22.108	9.56415	7.94759	19.1064	9.94787	8.65159	22.9871	0.101329	0.617529	4.2906	0.00194038	0.0491162
SFXN5	22.5518	21.6593	18.3989	25.802	15.9051	9.9781	28.6538	7.83528	20.7572	10.9603	9.64196	20.9787	25.1834	13.8186	12.5921	22.2588	18.7107	24.187	23.1078	27.6924	28.9612	22.5836	22.0852	34.5445	18.5246	24.7865	24.2937	17.4634	25.1261	31.909	17.6823	24.3461	30.4408	20.9882	0.0429286	-0.465139	4.55936	0.00194046	0.0491162
MAP1LC3A	2.19254	4.9983	4.80569	2.3798	7.39771	3.07019	3.87214	9.14116	4.51243	6.30732	6.54925	5.17829	3.33309	1.60851	4.51672	2.07498	4.46178	2.92371	2.41124	1.33457	2.10828	2.43208	3.93768	1.72108	4.85891	2.15535	1.46938	2.22938	6.64627	1.30483	2.61081	0.392679	0.801073	1.99888	0.0131386	0.84158	2.46496	0.00196534	0.049579
PML	46.6697	20.6874	19.6347	73.398	51.784	66.009	21.4904	12.1882	18.9522	46.8396	51.3025	42.8869	33.7013	38.6775	32.8489	31.5962	92.6898	20.3331	13.4628	26.5803	34.0654	18.7618	29.9606	30.6106	20.1949	31.013	16.7509	23.0369	38.7429	15.0648	31.3298	8.37715	5.4473	53.1702	0.198353	0.739273	5.14073	0.00197162	0.049579
ZNF496	14.2515	16.661	5.21761	15.9071	23.8576	19.4957	11.2292	20.2411	14.1819	12.8214	10.7335	14.0743	16.4803	8.99306	16.835	18.7691	13.8171	12.758	12.0562	4.78222	13.5374	9.72834	13.6963	15.3668	11.5399	10.5372	11.1673	7.05969	8.75362	10.6759	9.73122	11.5186	6.24837	7.59575	0.0270218	0.503197	3.88794	0.00197197	0.049579
EEF1A1	9730.32	12904.4	13697.6	6971.43	6121.79	7701.1	9948.87	11569.7	13894.5	9861.13	9671.79	11018.2	12727.8	10683.2	7145.45	10142.2	11514.8	11078.6	16006.8	10558.7	11449.5	14007.5	16623.7	10752.9	11772.1	11615.8	13971.4	13456.9	14732.5	15782.3	12219.8	13051.1	12313.8	14887.9	0.0569933	-0.366408	13.5385	0.00197601	0.049579
TECPR2	7.67388	5.69251	6.45336	12.0242	3.14403	4.29826	4.25935	2.17647	5.80169	3.41216	2.36501	8.49771	7.59205	5.92226	6.56977	11.0351	8.92355	9.03692	7.23373	11.8999	9.54276	6.48556	8.38896	8.35951	5.46628	13.2913	6.95507	6.68813	12.1578	12.5738	9.73122	12.3039	9.13224	9.9944	0.020276	-0.592107	3.31025	0.00197649	0.049579
HIST1H1C	56.5361	135.787	74.8315	65.0061	89.6973	310.242	229.037	206.547	110.361	583.789	399.323	113.657	163.599	241.277	388.985	113.369	437.83	91.4323	127.595	87.4146	36.1737	72.2677	97.4147	95.3968	273.01	21.1942	109.91	110.168	141.679	176.389	171.127	139.401	124.487	140.921	0.318307	0.879034	7.43873	0.00200653	0.0500743
HIST2H2BE	298.498	286.847	268.295	547.98	362.303	808.38	534.548	892.352	341.784	729.167	1320.77	483.971	361.919	550.039	1447.4	521.102	1314.93	316.558	249.966	415.72	421.102	204.295	310.734	460.265	336.024	236.37	454.724	425.068	509.818	340.797	736.25	556.95	479.522	414.568	0.191859	0.676929	9.07119	0.00200698	0.0500743
DNASE2	119.963	33.0443	52.9999	111.35	99.4993	150.9	53.2419	243.111	124.801	168.54	170.644	98.7859	73.791	127.511	134.68	61.2118	184.084	83.0599	33.5565	51.7147	61.3622	43.1985	86.8001	46.2232	71.5171	80.4662	65.8282	109.797	60.4649	87.898	136.237	81.6773	48.3848	118.134	0.169177	0.651611	6.63815	0.00200374	0.0500743
MKRN1	59.0419	39.2922	53.2745	81.0384	44.9411	30.0878	41.8191	57.4587	57.888	35.8793	40.2051	40.0986	36.4789	49.2059	44.2091	63.947	68.7977	67.3782	85.1973	55.9409	80.7806	49.9156	58.3803	78.9236	51.1704	79.7478	66.6119	57.9638	58.6817	58.1242	47.588	75.3944	63.6052	71.36	0.0507316	-0.401267	5.90957	0.00201383	0.0501554
GTPBP1	138.756	127.04	120.417	114.731	143.331	121.886	112.486	144.082	104.044	121.287	71.1322	94.537	99.067	55.2013	140.839	165.998	123.059	135.155	85.1973	56.8306	98.2017	85.123	84.7457	117.279	113.729	94.5957	63.8691	55.7344	74.73	64.6483	44.9772	117.935	94.5266	59.1669	0.0785182	0.45539	6.70535	0.00202723	0.0503098
MAN1A2	47.4528	35.2658	74.2823	44.2142	31.9951	24.2545	35.43	32.2117	53.2467	46.1158	25.8332	37.443	43.7006	38.9699	41.4717	55.2698	37.4214	52.2281	52.6455	57.053	50.3769	53.0426	47.2521	62.4505	49.9557	61.1879	65.5343	46.6311	42.9576	48.0414	49.3681	65.9701	57.3568	58.3673	0.0458193	-0.39727	5.65799	0.00202633	0.0503098
TFEC	43.2243	50.3995	30.2072	47.8465	62.6956	108.224	36.0109	33.7352	33.1341	67.5193	41.8425	37.8414	36.7566	39.8473	89.9238	61.7777	66.6388	36.1477	38.7808	47.9334	20.639	45.6305	45.0265	26.7996	34.6198	36.0422	35.3631	30.6539	29.503	29.6552	55.8952	29.9745	34.4462	38.1786	0.0898239	0.51337	5.54789	0.00205907	0.0503841
CNDP2	86.6052	124.402	61.6502	102.582	166.079	154.737	82.4765	138.641	70.3939	107.638	136.625	118.171	82.4015	110.037	137.281	148.361	173.146	86.1165	123.174	66.6175	70.794	89.2922	124.807	57.2872	92.3194	49.094	69.3547	70.4111	94.993	89.0842	107.518	92.2796	70.8149	96.5459	0.0784024	0.454816	6.71021	0.00203621	0.0503841
EBAG9	41.6582	47.9004	29.658	26.0525	46.2357	53.2677	45.1104	43.0941	48.6053	46.426	54.759	42.8869	36.664	46.6469	44.6197	27.2576	29.9371	33.4898	33.5565	26.5803	26.631	37.6394	43.6569	26.9225	34.0124	28.0195	35.461	39.5714	27.8819	31.909	39.5182	25.0006	26.5956	24.3863	0.0338761	0.379591	5.29411	0.00204248	0.0503841
PIK3AP1	518.848	482.752	678.564	382.897	464.576	531.91	369.595	384.364	512.225	527.747	444.076	385.584	390.62	582.648	637.542	523.365	618.316	425.665	398.257	385.358	300.264	336.902	409.518	304.753	355.764	452.383	326.79	378.436	352.414	334.748	445.619	533.389	299.121	469.937	0.0542393	0.363446	8.80532	0.00204523	0.0503841
ATP5H	305.859	344.744	201.976	256.893	303.306	440.572	342.103	393.288	339.335	324.465	400.05	369.783	332.661	290.41	346.419	247.016	357.806	275.094	275.686	197.628	244.45	295.904	336.757	264.062	219.258	243.793	206.399	296.507	300.379	244.952	262.387	199.612	252.498	292.036	0.0440146	0.332737	8.22497	0.00205233	0.0503841
PIP4K2B	46.0433	35.4046	34.3264	41.4586	42.5369	31.0089	35.0428	12.8412	37.0019	25.6429	29.8355	35.9825	44.3487	27.1985	32.712	36.1234	30.2249	45.7162	61.8886	47.0437	41.167	45.978	50.8474	52.9846	27.6351	46.4597	46.4324	35.8558	40.8502	72.5959	34.4153	41.8858	31.5623	39.1781	0.0463353	-0.41124	5.38779	0.00203885	0.0503841
ARHGEF40	28.9728	16.661	48.7434	46.7192	31.0704	12.2807	19.7479	26.5529	16.1158	18.7152	21.467	33.4597	35.4604	12.2101	23.5417	31.2189	24.6117	31.3634	25.7199	49.0456	58.81	33.1227	25.3381	47.9443	28.8498	40.4726	35.9508	34.1838	36.7976	48.5159	30.6177	33.9013	28.8386	43.3757	0.0803068	-0.51122	5.09622	0.0020585	0.0503841
SCARB1	19.1064	18.8825	30.3445	29.4344	23.1179	10.8992	10.6484	40.4823	21.4018	18.922	16.3731	17.1282	15.1841	13.7455	16.0138	17.26	25.9071	20.9975	19.4909	35.6998	40.1684	36.8287	20.3732	14.7521	44.4894	21.314	31.8366	27.3098	21.0735	19.3352	28.0069	30.1054	38.7719	51.9709	0.0931792	-0.557801	4.77184	0.00205144	0.0503841
NPRL3	15.8176	10.4131	15.1036	16.4081	14.9804	7.67547	13.5525	13.0588	11.8612	10.6501	8.36849	8.76326	11.4807	12.0639	8.62283	12.2612	14.9685	19.2699	19.29	14.9027	22.1925	17.372	17.4627	13.5227	16.5507	15.3269	11.853	15.4198	10.861	12.9297	11.986	17.147	21.4688	19.9888	0.011944	-0.438452	4.03767	0.00211396	0.0516367
NEXN	0.469829	1.94378	0.686527	1.25253	1.66449	5.37283	1.54885	0.435294	0.38678	1.96457	1.09154	0.929437	0.740688	0.804257	2.60053	1.60339	2.015	0.398688	0.602811	0.111214	0.110962	0.694881	0.51361	0.737604	0.151841	0.359224	0.881628	0	0.162104	0.474483	0.830714	0.392679	0.640859	0.199888	0.00165822	1.54685	1.58403	0.00211868	0.0516584
CYSLTR1	88.4845	115.933	17.987	56.2384	85.6285	155.505	74.9258	35.0411	71.6831	55.9387	50.7567	89.757	74.3465	41.2365	47.6308	48.1017	53.2535	65.3848	51.2389	22.4653	31.9571	57.9068	114.706	42.2893	38.1121	37.8383	18.2203	20.2502	49.766	59.7848	38.5688	27.0949	17.143	16.7906	0.191808	0.701035	5.84071	0.00212224	0.0516584
THAP6	3.1322	5.27598	1.78497	3.50707	5.91817	13.8158	7.35706	1.74117	5.41491	5.68693	4.36617	10.7549	5.9255	10.0898	5.47481	3.67837	5.03749	3.72108	3.41593	2.44672	2.33021	3.24278	2.39685	2.95042	4.40339	3.83172	1.86121	3.15828	4.0526	3.44	6.17102	2.35607	3.68494	2.19877	0.0379571	0.794005	2.7269	0.00213188	0.0518029
VDR	60.4514	32.6278	40.7797	66.2586	59.1817	64.0134	21.8776	154.964	41.2565	38.8779	35.1113	46.4718	37.6825	47.3781	55.2956	41.7825	52.9656	40.9319	27.9302	37.9241	49.3782	39.6082	27.9061	21.8823	40.3897	51.0098	19.1999	35.8558	45.5513	26.4524	40.1116	35.6029	23.2311	37.1792	0.114271	0.565612	5.53974	0.00214838	0.0521131
NSD1	23.8047	19.1601	14.829	18.5374	23.8576	17.3466	18.9735	5.44117	19.9836	9.61608	9.64196	23.1031	22.128	10.894	7.39099	16.8828	6.18892	29.1042	32.1499	17.0158	25.4104	21.4255	34.0695	33.561	12.9065	35.5632	19.7877	13.7478	23.6672	27.2828	14.2408	23.6916	14.7397	14.3919	0.0847568	-0.561075	4.43421	0.00218284	0.0528572
MT1X	9.08337	11.2462	7.68911	21.4182	26.6318	20.2632	16.8438	33.3	15.729	20.6797	40.0232	11.1532	18.7024	17.255	31.7539	16.0339	24.8996	13.8212	6.63092	11.2327	9.54276	11.6972	12.669	12.1705	7.74389	13.6505	8.22853	19.507	17.3451	8.18483	22.1919	7.85358	16.3419	20.7884	0.1066	0.625519	4.2305	0.00219294	0.0529541
TRRAP	29.1294	27.7683	45.4481	32.0647	30.7005	18.4211	24.3945	21.3294	20.3704	15.1996	13.0985	28.1487	32.0347	16.6701	22.9942	41.4052	21.5892	29.37	28.3321	48.7119	42.1657	32.6594	23.9685	37.9866	29.3053	40.8318	37.2243	31.2113	32.2587	35.8235	29.9057	48.0377	42.4569	28.1842	0.0557763	-0.454991	5.04464	0.00219442	0.0529541
GIMAP2	160.995	242.695	100.782	125.628	165.709	415.703	183.539	209.376	185.138	174.02	208.848	214.169	194.801	188.05	156.443	142.419	199.629	145.654	181.848	98.0911	105.636	154.959	188.152	120.352	99.7596	141.894	109.42	158.471	212.519	133.686	160.565	122.516	127.531	135.324	0.0759367	0.434791	7.40991	0.00220702	0.0531234
FBXW2	56.2229	47.345	78.4014	72.2707	54.1883	39.6054	68.924	65.0764	51.3128	36.7065	52.0302	60.0151	60.1809	51.9843	44.4828	71.1151	42.3149	64.4545	84.3936	72.067	82.9998	55.4747	77.2127	75.2356	54.6628	89.0876	73.9588	48.3031	103.747	83.8649	50.5549	69.2424	86.0353	61.9653	0.048048	-0.383468	6.06707	0.00220904	0.0531234
UBN2	27.7199	29.9898	25.4015	23.798	28.6661	26.0966	30.9771	10.6647	25.2696	24.4021	18.1924	31.2025	28.5165	22.373	20.8043	39.7075	22.165	38.5398	31.1452	36.2559	27.2967	32.312	34.4119	32.5775	37.8084	28.259	40.1631	26.1952	31.4482	36.4166	21.4799	43.0638	42.6171	28.7839	0.0341049	-0.396004	4.99782	0.00225237	0.0540724
RNF24	7.20405	9.02471	11.1217	8.39192	6.65794	3.53071	4.84017	8.92352	10.572	8.99568	11.4612	5.97495	6.38843	8.91995	8.89657	12.8271	10.3628	8.50533	12.4581	17.0158	7.76736	6.94881	13.0115	16.842	9.11046	11.4952	17.6326	15.7914	7.9431	7.47311	12.6981	10.8641	20.3473	15.991	0.0380383	-0.563136	3.66135	0.00226056	0.0541759
RUNX2	4.22846	3.60988	10.0233	4.50909	4.43863	1.6886	6.77624	5.65882	5.15706	5.58353	2.72886	4.77996	4.16637	4.67932	1.64244	4.33858	3.74214	7.30927	4.62155	6.8953	7.10159	8.10695	4.79369	6.1467	7.28837	7.66345	9.0122	7.05969	4.21471	7.11724	9.96856	7.33001	9.13224	6.79619	0.00165822	-0.631537	2.98839	0.00227189	0.0542695
GPR133	9.08337	10.9685	21.9689	12.6505	2.95909	4.45177	10.0676	4.57058	6.96203	6.10052	4.18425	9.95825	10.3696	9.2124	3.01115	5.37607	6.47677	13.1567	7.43467	18.5728	28.1844	11.2339	8.21776	14.9979	19.8912	10.5372	15.1836	12.0758	10.2126	13.76	8.66316	13.6129	3.68494	14.3919	0.114445	-0.698885	3.67937	0.00227223	0.0542695
SRGN	5881.32	9005.41	6757.63	2908.62	4432.16	4818.35	4768.53	10677.8	6992.33	6401.62	5268.33	5058.79	5161.85	3685.11	4477.98	3756.93	3441.76	5024.26	5220.14	1839.93	3803.23	5444.05	4506.93	4314.86	3349.77	4343.86	3660.81	4758.42	4094.91	2182.5	3700.24	1819.94	3697.11	3863.64	0.10874	0.499941	12.2054	0.00228291	0.0544314
SNORA71C	95.0622	313.921	53.5491	113.729	137.043	149.518	132.621	306.882	103.27	128.111	238.502	125.208	132.305	142.719	212.696	127.8	226.543	98.3429	163.965	74.7361	156.901	82.4592	119.671	115.189	98.6967	86.6928	93.1587	145.467	128.873	80.4249	125.912	114.008	111.99	69.7609	0.121504	0.543609	7.11843	0.00230519	0.0547758
BICD2	85.9788	55.1201	77.1657	100.453	88.2177	56.1844	68.1496	17.4117	54.1491	40.9459	45.1171	73.5583	63.6991	49.4253	67.0664	72.1525	70.3809	99.9377	87.0057	89.3052	123.945	97.6308	84.5745	98.9619	64.3806	95.1944	64.3588	58.5211	76.8374	95.6083	68.3559	96.3373	91.6428	75.1579	0.074202	-0.447683	6.28487	0.00230507	0.0547758
WARS	400.764	280.738	1030.07	453.665	360.084	483.094	292.54	1070.39	339.464	632.903	548.864	257.985	207.115	801.698	1541.98	1337.13	1980.02	315.362	375.35	489.01	345.537	186.923	282.314	289.141	310.667	416.221	360.782	412.249	277.36	191.572	538.658	713.891	791.621	541.097	0.279363	0.805492	9.14901	0.0023346	0.0553803
LILRB4	64.8365	31.7947	45.86	51.8546	67.1343	83.8161	39.3022	130.806	48.0896	52.8367	55.3048	59.2184	32.6828	37.1421	72.815	67.9083	102.333	31.0976	30.5424	36.1447	25.4104	49.4524	39.2056	36.0197	48.2855	38.3172	18.5142	34.9269	63.7069	27.52	40.3489	36.5192	39.2526	98.145	0.125977	0.576525	5.74672	0.00234228	0.0554684
NSL1	34.924	78.3067	19.6347	32.1899	63.8053	136.47	51.693	25.247	37.0019	66.0717	59.671	84.9771	60.3661	61.9278	61.5916	38.67	57.8592	38.9385	35.9677	29.027	19.9732	49.7998	58.3803	25.4473	35.6826	23.4693	39.3794	35.8558	69.0564	38.1959	50.7922	31.1525	23.872	34.1809	0.130428	0.588638	5.63803	0.00236943	0.0560165
ELOVL3	0.469829	0.83305	0.411916	3.25657	8.69231	2.45615	1.93607	1.08823	0.902486	2.17137	3.63847	1.32777	0.185172	2.63212	9.99153	2.82951	5.90106	0.797375	0.803748	1.89065	0.887699	0.579068	0.51361	1.35227	0.607364	0.83819	0.979587	1.48625	0.972625	0.593104	2.37347	1.9634	0.801073	0.99944	0.19697	1.29561	2.00887	0.00238771	0.0563531
CST3	3540.63	3076.04	2269.25	3005.81	2942.26	3562.8	4191.59	4802.38	4738.44	3190.37	4267.02	3755.99	3447.16	3824.39	3792.54	1867.67	3426.79	3031.09	2292.09	1914.89	3334.31	2286.97	3380.58	2799.21	1983.96	3302.11	2228.85	3306.16	2740.7	2417.02	3714.83	1819.28	1862.34	2689.09	0.0676156	0.392415	11.6051	0.00239626	0.0564596
RPL3	946.393	586.328	1187.69	738.614	534.855	320.374	933.572	1569.45	1256.78	953.439	700.588	600.018	789.758	889.947	632.067	836.404	1119.62	1147.42	1008.3	1241.15	1270.07	1147.71	959.252	927.783	1181.32	1134.19	1324.6	1314.4	838.079	1188.58	1056.43	1157.62	1426.07	1555.73	0.0921267	-0.459497	10.0103	0.00241005	0.056689
KCTD3	9.70981	12.7734	16.202	16.4081	11.2815	4.75879	11.81	7.61764	14.9555	15.6132	7.82272	10.8877	13.1472	9.06617	10.9496	19.2407	7.91605	10.3659	17.8834	19.685	13.2045	20.2674	16.7779	15.4897	16.5507	18.6797	25.1754	10.218	15.562	17.7931	12.1047	14.2673	19.0655	13.9922	0.0305315	-0.477675	4.02243	0.0024369	0.0572241
COX20	17.2271	15.2726	11.1217	14.5293	20.5287	25.1755	18.199	28.0764	23.4646	19.4389	17.6466	20.5804	16.5729	17.9861	22.5836	9.90329	17.8471	14.3528	12.4581	9.78687	15.3128	16.2139	13.6963	10.4494	12.451	15.8059	10.2857	19.8786	14.1031	10.2014	13.8848	11.6495	8.01073	20.1887	0.0241079	0.450433	4.18731	0.0024443	0.0573015
PSMG1	17.0705	32.3501	18.8109	20.7919	26.2619	34.2326	32.1387	24.1588	29.782	33.9148	38.204	27.352	34.7197	34.8024	28.469	20.7498	16.4078	19.8015	23.5096	18.0167	19.1965	25.9422	19.0036	15.3668	27.4832	17.123	18.8081	23.78	23.1809	22.5379	27.8882	15.0527	18.7451	10.9938	0.0377249	0.426276	4.7179	0.00247734	0.0579788
ANKRD52	6.10778	9.30239	10.7098	12.5253	9.0622	5.83335	13.1653	6.31176	8.50915	3.41216	7.45887	8.89604	9.53636	6.72652	5.88542	9.71466	5.46927	10.233	14.4675	11.3439	20.1951	7.87532	12.8403	16.4732	6.22548	17.8415	11.853	8.17438	18.3178	9.96414	8.54448	10.2097	11.8559	6.39642	0.0320343	-0.553786	3.60563	0.00248214	0.0579941
EMB	56.8494	90.1082	77.5776	55.9879	54.928	13.3553	46.272	37.4352	87.9279	54.0775	94.2365	48.729	60.1809	27.1254	45.0303	69.1344	44.9056	89.9705	97.0526	76.2931	63.1376	84.4281	67.7965	73.5145	78.9573	68.8513	99.1342	125.588	71.8121	69.9862	65.9824	59.6872	56.2353	110.738	0.0999315	-0.508525	6.15424	0.0024926	0.0581413
KIAA0754	15.1912	14.8561	34.601	14.6546	18.6792	13.9693	24.9753	6.09411	12.6348	11.0637	9.64196	22.3065	23.0539	7.01897	9.44405	19.1464	5.75713	22.7252	20.2946	25.3569	20.75	26.058	24.3109	23.2345	38.5676	26.5826	27.3305	15.6056	18.1557	32.7393	10.2059	20.2884	26.5956	12.3931	0.0991427	-0.583708	4.42575	0.00249982	0.0582125
HES1	2.03593	0.416525	1.23575	0.626263	1.10966	2.14913	0.774427	0.870587	0.257853	0.103399	0.181924	0.531107	0.740688	0.804257	0.13687	0	0.143928	1.86054	3.21499	0.667287	6.32485	2.08464	0.171203	7.25311	0.911046	8.02267	0.391835	0.928906	1.94525	2.37241	0.237347	0.392679	0.320429	0.799552	0.304796	-1.49773	1.81076	0.00251174	0.0583927
SURF4	80.0276	64.8391	61.9248	75.2768	59.9215	43.2896	60.4053	81.6175	73.746	56.4557	65.1287	58.5545	62.5881	50.522	55.4325	60.08	78.8727	93.9574	106.698	64.6156	90.5453	84.8913	77.7263	85.9309	46.0078	82.2623	69.3547	82.4869	78.7826	80.1876	75.0016	70.944	76.903	119.333	0.0435088	-0.358984	6.24109	0.00251844	0.0584513
DBNDD2	24.901	19.7155	18.1243	21.0424	31.9951	14.8904	34.8492	51.7999	42.5458	26.3667	53.1217	20.9787	22.9613	24.932	24.226	16.2225	34.8306	19.4028	11.0515	17.127	18.6417	22.352	26.0229	19.4236	18.0691	23.3496	12.0489	28.9819	17.3451	18.9793	24.5654	13.482	11.5355	28.3841	0.083314	0.532656	4.71357	0.00255742	0.0591594
NCF1B	90.0506	67.0605	103.666	44.2142	59.5516	37.1493	72.7961	34.1705	55.0516	78.3762	53.4856	88.5621	50.3668	31.366	71.9938	52.346	103.772	73.0927	64.0989	50.1577	35.397	31.2697	50.8474	46.8379	28.0906	42.9872	44.2773	42.9155	45.8755	50.0579	61.1168	34.9484	36.8494	34.9804	0.0874334	0.487668	5.84692	0.00255497	0.0591594
GZMA	1.5661	0.555367	0.686527	0.50101	0.369886	0.307019	0.968034	15.8882	1.67604	4.13595	7.6408	2.2572	0.92586	1.38917	2.18992	0.471585	1.15143	0.797375	0	0.444858	0	0.231627	0	0.368802	4.25155	0.598707	0.195917	0	0.648417	0	3.32285	0	0.320429	0	0.734758	1.73939	1.85873	0.00259085	0.0596364
EXOSC3	9.70981	12.7734	4.943	11.7737	22.3781	24.8685	16.0694	4.78823	10.7009	19.2322	19.2839	15.1365	12.3139	20.5451	24.7735	8.48854	14.3928	9.03692	7.43467	12.7897	6.10293	12.1604	7.87535	5.90083	11.3881	7.66345	5.58364	11.3327	7.45679	9.84552	21.1239	9.81698	8.01073	7.39586	0.0898035	0.626987	3.84065	0.0025864	0.0596364
SLC44A1	18.48	18.4659	38.7201	18.1616	16.275	17.9606	12.0036	29.3823	25.1407	18.922	24.9236	16.066	16.11	22.2267	20.1199	26.0315	31.5203	17.808	37.5752	36.7008	19.6403	28.9534	30.6454	38.6013	17.0062	28.7379	32.0325	26.7525	25.4504	32.2648	31.8045	27.0949	32.3634	40.5773	0.0519346	-0.453559	4.81306	0.00258967	0.0596364
MAP4K1	31.7918	38.598	42.4274	41.5839	22.748	21.3378	40.851	37.8705	53.8913	35.6725	29.2897	34.6547	51.1075	26.3943	19.1618	36.3121	23.0285	41.4635	44.809	65.839	45.8274	35.6706	43.8281	37.249	68.3285	60.3497	66.2201	46.8169	29.0166	61.4455	24.328	56.0222	55.9149	25.3858	0.078282	-0.47854	5.44673	0.00260328	0.0598241
HIST1H2AG	3.91525	5.41482	5.21761	13.1515	12.3912	57.1055	10.0676	2.82941	7.34881	29.7788	67.1299	32.9286	11.0177	19.8871	5.47481	0.943171	22.5967	3.1895	3.01406	7.78501	6.54678	3.70603	4.45129	6.39257	14.2731	3.59224	5.87752	10.218	33.2314	6.99862	11.274	1.04714	0.640859	6.79619	0.581038	1.23249	3.90465	0.00263344	0.06022
P2RX4	79.871	80.5282	143.484	63.002	75.0868	100.242	69.6984	128.194	87.799	73.4131	60.5806	67.8489	69.5321	57.1754	73.2256	62.7208	61.6013	59.5373	82.5851	36.7008	49.1563	74.1207	69.3374	62.4505	90.1936	61.4273	48.2936	36.5989	52.0354	64.2924	54.1151	54.9751	50.6278	57.9675	0.064284	0.418835	6.17135	0.00263078	0.06022
STAT5B	90.3639	85.5265	144.857	95.3172	67.1343	58.18	74.1514	82.0528	71.4253	87.1651	63.4914	79.1349	90.4565	67.6307	74.5943	106.484	78.7288	109.772	106.899	125.005	99.0894	92.0718	86.1153	115.066	105.681	109.923	117.648	99.2072	91.4267	91.6938	85.3262	121.338	127.05	122.331	0.0485719	-0.363011	6.6167	0.00262489	0.06022
CLIC1	227.711	270.741	154.743	133.018	183.093	211.996	192.639	379.576	227.426	278.142	249.417	237.67	217.114	154.637	227.889	173.543	275.191	177.948	151.507	113.995	125.498	190.397	218.798	133.629	202.404	142.612	148.505	173.334	193.228	166.069	165.431	143.721	135.542	265.851	0.0675856	0.401963	7.6403	0.00265565	0.0605297
KLF12	5.63795	1.52726	12.7694	4.7596	1.10966	5.67984	2.71049	7.83528	6.44633	2.17137	1.81924	2.65553	2.40724	8.99306	2.05305	2.54656	0.86357	8.10665	3.41593	8.78594	11.873	4.40091	4.10888	4.17976	13.362	16.6441	8.13057	3.34406	7.6189	10.7945	5.93367	15.7072	8.17095	1.39922	0.199799	-0.911349	3.03948	0.00265267	0.0605297
CRTAP	126.697	110.379	137.443	118.238	107.082	34.5396	129.136	178.035	210.15	118.598	86.7776	143.399	152.859	85.8362	88.9657	136.194	129.535	150.837	143.469	138.128	178.427	209.507	120.527	177.025	132.557	220.324	169.175	174.449	171.344	178.761	133.389	139.139	178.639	193.692	0.0792156	-0.437407	7.20961	0.0026752	0.0608761
ZER1	17.2271	17.2164	24.715	20.0404	20.7136	11.2062	23.8136	13.7117	19.4679	18.0948	18.9201	16.9954	18.332	18.1323	18.3406	23.6736	17.8471	23.5226	22.9068	25.8018	23.7459	17.7195	25.1669	22.9887	20.1949	28.8577	26.7427	27.8672	23.0188	20.0469	20.2931	23.8225	27.2365	26.785	0.0127309	-0.363553	4.5628	0.00270748	0.0615104
SLC9A6	19.5762	13.6065	24.1658	18.4121	13.6858	15.5044	13.7461	21.1117	12.3769	13.235	16.3731	15.5349	18.4246	15.7196	21.6255	23.8622	18.9985	17.808	21.9021	28.4709	23.4131	20.1516	19.0036	24.0951	19.7393	26.9418	22.2366	16.9061	19.4525	28.7062	19.2251	24.3461	29.3193	23.9866	0.0191348	-0.392464	4.482	0.00272299	0.0617623
PLK3	59.5117	82.6108	178.36	48.7233	96.3552	72.6099	64.0838	320.811	54.0202	66.1751	38.9317	37.7086	61.4771	40.5784	27.7847	40.9336	42.0271	60.7334	50.4352	9.00837	76.675	65.5505	33.2135	74.2521	87.7641	27.4208	33.8937	41.615	20.9114	18.3862	21.8359	25.2624	43.7386	47.9731	0.29812	0.838983	5.98815	0.00274714	0.0622092
SPTAN1	60.1382	42.069	61.1009	34.695	42.5369	24.8685	36.2045	46.3588	51.4417	43.841	33.292	43.8163	43.1451	44.9653	31.2064	48.3846	32.096	56.3478	67.3139	58.9437	45.9384	48.2942	44.1705	65.0321	59.218	63.5827	57.8936	47.1884	44.7407	55.8704	55.6578	60.4726	47.1031	39.7777	0.038344	-0.361395	5.66697	0.00276442	0.0624991
HSPH1	31.322	24.8527	16.4767	27.4303	28.4812	111.755	25.7497	55.9352	30.5556	26.5735	13.8262	20.0493	22.128	59.8075	42.156	22.3531	30.3689	27.5094	26.1218	32.5858	14.869	25.0157	20.0308	15.6126	32.7977	19.9968	15.4775	16.5345	16.8588	24.7917	25.2774	25.3932	17.944	17.9899	0.145194	0.635381	4.94023	0.00278945	0.0629633
BAZ1A	52.4643	73.7249	63.9844	49.7253	79.5254	78.5968	56.7268	29.3823	56.212	52.3197	46.5725	60.9445	55.3664	55.5669	78.8373	62.8152	44.6178	46.3806	50.0333	43.3736	33.6216	54.4324	49.9914	47.2067	36.7455	68.971	35.657	36.2273	48.9555	45.9062	51.2669	40.9695	37.0096	33.7811	0.0452483	0.378345	5.76209	0.00280666	0.0629645
DIP2A	9.5532	10.1354	16.0647	22.0445	10.1719	7.36845	16.0694	3.69999	8.89593	5.48013	7.82272	10.3566	13.9805	10.1629	3.01115	7.54536	7.91605	15.5488	9.64498	22.5765	29.405	12.8553	11.4706	18.686	15.0323	20.1166	11.951	13.3763	14.7515	24.3172	12.4607	8.11537	7.53009	11.3936	0.0902059	-0.613133	3.88746	0.00279462	0.0629645
DGKE	4.8549	4.44293	7.68911	4.38384	1.84943	4.29826	4.64656	3.69999	6.05955	3.10196	2.54693	7.30272	4.6293	2.70523	1.91618	2.73519	2.73464	3.98688	11.0515	5.67194	9.09891	6.48556	6.50573	6.8843	5.46628	8.50164	8.03261	4.27297	9.72625	6.40552	1.89877	5.89019	4.64623	5.59687	0.00165822	-0.65853	2.88067	0.00280753	0.0629645
EXTL3	3.60203	2.77683	9.19947	4.63435	2.40426	1.99562	1.35525	4.57058	1.41819	1.75778	2.00116	2.92109	1.75913	3.29014	2.7374	5.47039	5.32535	3.58819	3.8178	6.78408	6.65774	2.89534	3.59527	6.39257	2.73314	6.58578	5.97548	4.45875	4.0526	4.98207	6.17102	9.68608	11.6957	7.19597	0.0372386	-0.75727	2.72989	0.00280744	0.0629645
DACH1	3.75864	3.88757	4.25647	3.50707	1.84943	0.767547	3.48492	2.17647	1.80497	3.82575	1.09154	3.85052	2.22206	0.950486	1.3687	4.14995	3.02249	4.51846	1.80843	3.00279	4.32753	1.85302	5.3073	6.63844	4.40339	2.75405	5.58364	5.57344	5.18733	3.79586	4.62826	3.53411	6.40859	11.1937	0.00872812	-0.793225	2.53398	0.00282964	0.0633586
REC8	28.9728	50.9549	36.1113	38.3273	39.9477	49.2765	35.0428	100.988	19.8547	14.0622	24.5597	39.4347	44.4413	38.8237	33.3963	42.1597	19.5742	18.0738	31.3462	14.013	32.29	20.499	33.3847	45.7314	28.8498	27.6603	24.6856	16.163	26.0988	20.9959	13.1727	37.6972	29.1591	8.59519	0.13204	0.600152	5.09649	0.00283851	0.0634554
TESPA1	0.939659	1.80494	2.19689	4.50909	3.51391	4.45177	3.29131	2.82941	3.60994	6.51412	4.36617	2.65553	1.75913	3.21703	5.20107	1.88634	5.90106	0.930271	1.20562	3.114	0.776736	0.694881	0.342407	0.860538	2.5813	1.79612	1.95917	2.9725	2.26946	2.60966	3.20418	0.916251	0.801073	2.99832	0.00165822	0.906249	2.22197	0.00284405	0.0634778
MFAP1	14.4081	22.0758	10.8471	11.5232	20.1588	20.8773	21.8776	19.3706	18.3076	21.5069	26.197	11.6843	10.6474	26.3212	27.2372	11.8839	14.8246	13.8212	16.075	11.3439	7.76736	7.99113	10.957	12.4163	22.6243	15.0874	11.4612	12.8189	10.6989	12.2179	19.9371	12.5657	10.5742	7.19597	0.0506826	0.506896	4.14261	0.00286912	0.0638115
DNAJC3	79.871	109.963	123.85	56.3637	60.2914	47.8949	64.4711	96.8528	128.411	81.2714	69.4949	75.5499	73.791	107.917	71.8569	78.8491	67.9341	110.835	138.245	85.1903	81.5573	107.475	103.578	92.8152	101.126	105.732	139.297	124.659	109.582	90.389	117.605	89.6617	98.0514	121.132	0.0598133	-0.39276	6.61077	0.00286992	0.0638115
PPM1F	27.7199	13.6065	76.7538	52.6061	18.6792	27.3247	19.1671	18.2823	17.4051	18.6118	28.3801	21.2443	31.2015	33.7057	31.617	51.7801	50.087	30.8318	23.3087	54.4951	91.6549	26.2897	28.7622	37.4949	26.2685	70.6474	53.4854	44.2159	47.1723	54.9214	39.1622	73.6928	66.1687	69.1613	0.165376	-0.647696	5.43141	0.00287271	0.0638115
NPEPPS	43.5375	56.9251	66.3185	64.8808	48.455	39.1449	66.7943	63.3352	35.7126	35.6725	37.1124	40.6297	64.4398	34.3637	37.6393	60.2686	40.5878	49.1715	87.0057	69.3978	62.6937	59.2965	58.0379	78.5548	46.6152	76.1555	62.2038	46.6311	76.9995	80.069	43.1971	67.5408	77.3837	49.5722	0.053717	-0.395365	5.891	0.00288275	0.0639329
AMY2A	7.9871	6.80324	12.3575	7.26465	7.7676	6.14037	15.2949	6.74705	3.99672	1.96457	4.00232	7.9666	8.33274	3.50949	3.14802	9.05444	4.6057	7.44217	15.2712	10.5654	10.3195	14.0134	11.1282	16.3502	7.74389	7.42397	10.4816	3.34406	14.9136	13.9972	5.22163	7.72269	17.6236	7.59575	0.0701636	-0.635206	3.44434	0.00289079	0.0640096
MT1E	1.25288	0.694208	0.686527	3.88283	0.924714	3.83773	2.51689	4.78823	0.515706	5.48013	10.1877	2.2572	2.96275	1.60851	13.2764	3.67837	7.34034	0.265792	0.401874	1.89065	0.665774	0.347441	1.54083	0.983472	1.67025	2.75405	1.95917	1.30047	1.94525	0.711724	1.30541	2.22518	5.28708	2.19877	0.255461	1.1911	2.2653	0.00290411	0.064203
KIAA0141	44.4772	49.5665	47.0958	40.9576	31.9951	28.3992	47.24	51.147	65.6236	32.4672	39.8413	48.8618	54.0702	50.4489	25.0473	53.0062	40.156	57.8097	52.0427	56.4969	52.8181	54.5482	53.2442	42.2893	63.4696	53.2849	56.1303	61.6794	55.9259	69.749	48.4187	60.6035	62.9644	47.7732	0.0365683	-0.352008	5.71823	0.00292003	0.0644528
SDC2	19.1064	14.3007	12.4948	1.12727	3.32897	0.921056	6.00181	279.023	8.63808	4.85974	8.55042	4.24885	8.33274	1.5354	2.7374	7.26241	2.30285	17.2765	6.42999	2.44672	4.43849	4.40091	0.856017	6.63844	5.01075	11.9741	7.93465	12.8189	13.6167	2.13517	2.49214	4.05768	11.5355	6.99608	1.09171	1.63636	4.08899	0.00293352	0.0645467
FAM219B	5.01151	4.72062	7.4145	10.2707	5.1784	5.37283	5.6146	5.44117	5.02813	4.85974	6.18541	6.10773	6.94395	4.89866	7.39099	4.33858	5.32535	6.91058	7.0328	10.7878	11.4291	7.64369	7.36174	8.72831	5.01075	8.02267	6.75915	6.31656	8.91573	10.9131	8.18846	9.94787	13.9387	9.79451	0.00165822	-0.563989	3.23357	0.0029329	0.0645467
LINC00515	0.31322	0.277683	59.7279	0.626263	0.184943	0	0.774427	0	0.38678	0.103399	0.181924	0.79666	0.277758	0.365572	0.27374	0.377268	0.143928	0.132896	3.61687	0	0	0.463254	0.342407	2.08988	0.303682	0.119741	0.0979587	0.185781	0.324208	0.237241	0	1.04714	0.160215	0.199888	2.3138	2.56086	2.08153	0.00294348	0.0646459
NUB1	86.292	93.857	64.259	70.6425	84.149	87.8073	75.313	77.9175	109.459	97.0913	89.5065	80.4627	73.0503	96.0722	112.781	132.044	113.559	78.5414	97.2535	64.0595	55.7031	54.664	93.1346	59.0083	67.4174	69.45	76.5057	65.0234	67.2732	80.069	69.4239	78.4049	67.2902	53.3701	0.0466263	0.358227	6.38587	0.00294728	0.0646459
F5	24.1179	26.9353	31.443	17.6606	11.4665	5.06581	9.09952	13.7117	21.015	23.1613	6.54925	13.1449	24.2575	6.1416	13.2764	24.5224	20.8696	31.895	48.8277	32.8083	14.647	31.038	16.0931	37.0031	25.2056	20.4758	27.8203	12.4473	17.3451	34.4	13.1727	20.9429	30.2806	34.7805	0.13375	-0.626571	4.59179	0.00295817	0.0647831
ERMP1	5.32473	4.85946	6.31605	5.26061	4.25369	5.52633	3.09771	1.52353	5.15706	4.03255	2.91078	5.44384	6.20326	3.29014	2.87428	3.96132	4.31785	4.91715	11.2525	8.22987	6.21389	7.87532	7.87535	7.25311	4.55523	8.74112	4.21222	2.41516	8.59152	11.1503	4.15357	6.80644	5.60751	6.39642	0.00165822	-0.642537	2.94307	0.00296627	0.0648587
SNRPB2	63.1138	122.042	44.3497	54.6101	78.9706	145.066	82.2829	87.2764	78.1295	89.0263	83.3211	104.362	95.1784	94.7561	93.6192	56.1186	74.267	67.644	70.9308	43.1512	46.2713	80.143	80.1232	49.0507	62.2548	47.8966	65.0446	85.2736	88.8331	51.4814	74.2895	45.9435	51.5891	58.5672	0.0690815	0.423694	6.26156	0.00298706	0.0652113
ACTR3	301.787	509.271	290.264	266.412	296.278	410.484	357.785	352.152	376.981	347.626	363.847	364.738	318.403	385.459	382.415	288.233	283.539	287.587	336.168	259.352	200.953	330.069	334.189	213.168	299.734	232.298	249.207	296.507	311.402	296.552	320.537	250.267	202.672	251.859	0.0450873	0.323383	8.30461	0.00299638	0.0653127
TLR4	308.208	294.205	180.145	207.794	286.661	471.12	183.926	127.541	152.391	279.073	286.348	342.697	231.558	201.795	273.33	275.406	263.964	212.633	204.353	284.042	115.623	202.442	188.495	122.934	238.39	170.512	112.065	152.712	174.748	208.535	226.785	185.868	183.446	192.692	0.0857564	0.442432	7.8223	0.00301255	0.0653593
MFNG	80.9673	70.3927	74.8315	92.6869	66.5794	37.1493	64.4711	77.6999	88.7014	30.7094	79.5007	71.1683	77.7722	80.9375	69.2563	83.8479	94.273	91.5652	77.3608	94.6435	134.042	77.8267	76.3567	88.3895	65.2917	111.838	54.465	109.239	92.0752	109.606	110.01	104.453	116.796	125.13	0.0672699	-0.414128	6.45701	0.0030097	0.0653593
TRIM23	1.87932	9.30239	5.49222	6.51313	5.91817	9.67109	10.4548	1.74117	4.64135	4.13595	3.8204	11.286	8.6105	7.45766	5.61168	7.35673	2.015	7.97375	16.6778	9.2308	8.43314	7.64369	16.7779	10.5723	8.04758	8.3819	8.32649	4.83031	16.3725	11.7435	7.83244	6.54465	9.77309	4.39754	0.05495	-0.627754	3.32609	0.00301024	0.0653593
WHAMMP1	172.427	343.911	240.147	205.289	158.496	375.791	256.335	231.576	279.513	165.955	161.548	281.885	341.92	254.803	155.758	243.81	326.285	205.457	278.901	217.758	337.88	445.303	569.594	303.77	257.522	305.82	273.109	261.58	399.263	286.232	331.099	279.98	322.192	664.828	0.096488	-0.465101	8.21702	0.00303144	0.0656298
CCNB1IP1	8.61354	9.02471	9.61138	6.26263	5.1784	7.36845	8.7123	11.5353	14.3108	6.72091	9.64196	7.83382	11.2029	9.13929	4.65359	6.97946	6.18892	11.9606	12.659	10.899	11.2072	14.0134	13.8675	10.5723	8.65494	11.6149	11.5591	13.3763	10.5368	13.76	10.7993	7.85358	15.2204	8.99496	0.00165822	-0.473089	3.60379	0.00303442	0.0656298
ERGIC2	27.4067	31.5171	45.7227	34.3192	36.9886	56.3379	28.073	59.8529	37.7755	47.3566	55.3048	40.4969	29.1646	59.8075	61.181	40.9336	37.4214	23.5226	20.8975	41.1493	26.8529	34.0492	24.8245	19.7924	37.0492	36.4014	26.8407	33.6264	25.6125	21.2331	52.5723	36.3883	33.1644	34.3807	0.0654487	0.450048	5.306	0.00305183	0.0659044
TNFAIP8	18.48	24.7138	308.525	31.1879	34.9542	50.1975	23.62	20.2411	18.8233	29.7788	48.7556	37.0447	19.4431	35.3142	40.2399	24.4281	44.6178	21.3962	38.7808	43.8185	21.3048	21.4255	26.5365	19.5465	27.0277	17.9612	14.5958	27.4956	24.1535	22.8938	44.2652	30.3672	18.4247	16.7906	0.324873	0.880303	5.29372	0.00306605	0.0660075
DCTN6	54.5002	69.5597	73.733	54.7354	63.4354	91.338	54.0163	128.194	59.3062	76.8252	91.3257	69.3094	64.7176	78.7441	94.7142	58.3823	67.7902	54.3544	54.4539	43.8185	53.04	63.1184	52.217	48.6819	50.7149	55.56	59.7548	73.5694	63.2206	36.1793	75.7136	51.0483	64.2461	51.3712	0.051919	0.38179	6.07873	0.00306171	0.0660075
MAT2B	85.9788	114.822	76.8911	76.9051	115.219	186.207	91.1888	92.4999	99.4023	147.86	136.079	122.42	125.547	142.134	157.811	110.257	147.239	79.073	82.3842	97.5351	54.5935	94.388	85.4305	55.0744	93.9896	92.2009	71.7057	109.054	109.582	80.1876	124.37	105.107	85.2342	97.3455	0.0666818	0.405828	6.75046	0.00307797	0.0661621
ACPP	34.6108	32.3501	63.5724	26.5535	20.3437	27.9387	37.7533	27.8588	30.0399	27.504	35.839	33.1942	41.5711	36.6303	36.955	48.479	47.9281	37.6095	33.9584	103.318	26.409	36.2496	35.7815	44.9938	51.9296	34.3658	45.9426	49.9752	47.6586	40.6869	48.0627	63.0904	72.8977	85.3522	0.0971397	-0.511076	5.52078	0.00309133	0.0663472
CD226	3.75864	1.11073	6.86527	3.88283	2.5892	25.6361	3.48492	11.3176	3.73887	2.99856	5.82156	1.06221	1.94431	8.33503	4.51672	1.88634	6.18892	2.39213	1.40656	2.55793	2.44117	1.15814	3.93768	2.95042	7.13653	3.11328	0.881628	3.34406	1.62104	0.593104	2.96683	4.84304	1.28172	1.19933	0.277088	1.06696	2.62147	0.00310877	0.0665172
IFT122	5.01151	8.3305	9.19947	7.1394	5.36334	3.53071	6.96984	7.18234	5.15706	4.65294	4.36617	4.24885	6.85136	4.45997	4.92733	7.82832	4.17392	7.04348	8.84123	11.1214	8.43314	7.41207	3.93768	12.0475	6.68101	7.42397	13.4203	7.24547	7.9431	6.99862	6.52704	9.4243	12.4967	9.39474	0.00452785	-0.561544	3.22501	0.00310643	0.0665172
MARVELD1	28.8162	19.9932	36.7979	29.3091	23.6727	4.45177	41.2382	42.2235	35.9705	28.1244	21.467	33.0614	32.4977	19.0828	14.782	32.3508	22.7407	33.7555	29.1359	43.2624	44.274	34.0492	40.9176	43.2728	26.724	51.0098	43.0039	27.8672	24.1535	53.6166	33.8219	34.294	46.302	35.3802	0.0760387	-0.47972	5.13496	0.00315673	0.0674402
MRPL54	45.1036	53.454	39.9559	20.2909	31.2553	92.5661	38.3341	73.347	44.9954	53.8707	54.3952	48.4635	41.7563	55.64	55.8431	33.5769	63.3284	44.653	31.949	29.3606	25.7433	36.8287	46.2249	25.3244	30.8237	21.0745	33.3059	50.1609	37.4461	28.5876	55.4205	31.5452	28.9989	47.1736	0.0790102	0.470228	5.49791	0.00316271	0.0674647
EDEM3	52.1511	49.8442	70.4377	58.994	60.1064	38.8379	41.6255	26.3353	43.4482	63.3834	39.1136	54.9696	55.0887	49.7177	45.3041	68.0026	52.8217	62.7268	63.2952	95.3108	48.1576	67.2877	49.649	57.2872	65.2917	63.9419	79.0526	51.2756	57.0607	67.3766	57.5566	75.6562	78.9858	83.3533	0.050934	-0.382058	5.94328	0.0031716	0.0675513
MED8	25.2142	28.3237	11.3964	22.1697	36.4337	39.4519	25.3625	36.7823	26.0432	31.8468	29.2897	28.4142	27.8684	24.274	39.1449	24.3338	38.2849	24.0541	28.5331	19.9074	15.4238	21.6571	27.5637	18.3172	22.6243	14.369	17.2407	19.507	24.1535	24.1986	27.1762	22.2518	18.7451	24.986	0.0351687	0.401927	4.79473	0.00318837	0.067805
MANBA	95.8452	126.901	150.487	103.208	85.0737	97.1714	101.644	94.4587	98.1131	85.0971	80.9561	107.018	114.992	101.556	81.4378	136.382	83.0466	110.569	159.544	134.792	111.073	151.137	151.001	125.761	106.137	103.097	144.881	108.31	143.786	121.942	119.504	144.113	130.094	109.938	0.0426982	-0.33151	6.89166	0.00320123	0.0679045
SLC41A3	13.9383	10.1354	19.2228	12.901	5.1784	9.21056	11.81	10.6647	18.6943	14.1656	13.6443	16.9954	16.8506	11.9176	9.17031	16.4112	7.91605	13.5554	16.8787	19.2401	19.1965	9.26508	15.2371	20.53	8.65494	32.5697	22.9223	14.3052	23.6672	24.3172	19.9371	18.9795	18.5849	10.9938	0.0527378	-0.50558	4.14893	0.00320763	0.0679045
2020-03-09	5.95117	5.41482	5.90414	6.63839	3.14403	1.99562	6.38902	3.69999	7.99344	5.16993	6.18541	3.9833	4.53671	2.92457	5.0642	5.37607	4.31785	7.17638	8.23842	7.00651	11.0962	5.90649	7.53295	7.49897	7.44021	11.2557	5.77956	8.73172	8.91573	6.99862	5.57765	8.24626	5.92794	4.19765	0.00165822	-0.591017	3.05955	0.00320631	0.0679045
SNX20	55.5965	33.322	4.943	48.598	63.6203	60.0221	32.9131	14.3647	29.5242	14.4758	11.2793	45.808	37.6825	12.9412	20.2568	10.3749	17.2714	39.0714	16.8787	7.34015	23.524	19.8041	22.5988	13.8915	5.9218	29.3366	4.01631	9.28906	24.6398	29.8924	11.8673	9.16251	7.20966	4.9972	0.296161	0.858613	4.66713	0.00321345	0.0679249
BOLA3	3.75864	2.77683	0.961138	5.13536	3.8838	10.2851	6.38902	8.48822	7.86452	5.68693	8.18657	8.49771	5.83292	9.06617	8.07534	2.45224	4.46178	1.86054	1.00469	2.11307	4.9933	4.86417	4.45129	3.07335	3.64419	3.35276	2.44897	6.31656	5.02523	3.08414	5.3403	2.74875	2.72365	3.19821	0.0195019	0.72431	2.77448	0.00323028	0.0680746
CCDC19	2.81898	4.9983	4.943	6.13738	2.95909	0.307019	3.09771	4.13529	2.57853	1.86118	3.45655	3.85052	3.51827	0.731143	2.7374	5.28176	2.59071	4.91715	7.63561	2.55793	9.76468	4.05347	4.79369	7.25311	2.5813	7.18448	4.11426	5.20188	9.56415	5.93104	0.949387	7.85358	5.60751	4.39754	0.0141273	-0.742842	2.69901	0.00322607	0.0680746
TMEM126B	46.8263	79.5563	33.3652	34.695	50.4894	125.264	43.5615	51.5823	60.7244	55.1115	68.7672	85.641	62.7733	69.751	66.7927	48.8562	44.186	43.0583	45.4118	31.8073	34.1764	57.6751	67.6253	35.405	35.379	43.8253	33.3059	46.2595	70.1911	30.2483	58.0313	38.0899	33.0042	35.9798	0.0806384	0.462365	5.76784	0.0032488	0.0683618
GPKOW	31.7918	27.3518	22.7927	30.5616	29.9607	27.9387	26.3305	31.9941	29.2663	47.977	34.7474	22.9704	23.3317	33.6326	44.7566	29.9928	47.0645	26.0476	26.3228	25.5793	17.8649	18.2985	18.6612	24.3409	27.7869	27.6603	20.0815	25.6378	17.3451	19.8097	28.0069	30.4981	21.3085	31.9821	0.0383578	0.400545	4.92297	0.00333329	0.0700342
SEMA6B	8.61354	11.5239	28.4222	9.5192	3.8838	1.22807	8.5187	35.6941	6.05955	0.827189	0.181924	3.18664	6.01809	1.0236	0.13687	3.3011	4.17392	12.6251	21.2993	4.11493	66.0226	7.75951	13.6963	141.128	4.55523	64.8998	34.1876	2.60094	8.59152	5.93104	0.118673	0.523572	6.5688	12.3931	1.09443	-1.61019	4.17102	0.00335333	0.0703494
ZFP106	97.4113	110.657	227.103	102.707	107.637	103.619	90.608	42.8764	97.4685	90.9908	81.5018	67.4506	95.4561	156.465	136.049	181.56	117.589	99.0074	262.223	256.572	101.641	118.13	162.472	189.318	90.3454	131.356	221.876	142.494	96.1278	196.199	150.834	206.157	180.882	131.326	0.12616	-0.532092	7.13809	0.00338241	0.0708531
EEF1B2	280.332	222.424	611.421	195.519	146.66	176.996	190.509	626.387	417.077	379.68	301.448	260.773	293.683	492.206	275.93	323.036	434.663	327.19	297.186	512.476	453.614	470.55	313.645	275.126	475.566	451.665	567.866	652.092	357.602	350.999	664.334	488.231	724.651	844.727	0.146848	-0.56246	8.70437	0.00340094	0.0711347
RMI2	0.31322	0.138842	0	0.375758	2.03437	0.153509	0	0	0.515706	0.516993	0.545771	0.663883	0.277758	0.146229	2.05305	0.377268	3.45428	0	0.200937	0.222429	0	0	0	0.122934	0	0.119741	0.0979587	0.185781	0.324208	0	0	0	0.160215	0	0.00499729	1.93581	1.26935	0.00344602	0.0718821
HIST1H2AJ	0.31322	0.555367	0.686527	0.751515	0.369886	3.68422	0.58082	8.05293	0.773559	6.30732	13.2804	2.38998	0.46293	1.82786	4.37985	0.754536	7.34034	0	0.401874	1.00093	0.554812	0.463254	0.171203	0.245868	1.21473	0.119741	1.27346	1.11469	2.75577	0.355862	1.66143	1.43982	3.36451	1.39922	0.49292	1.46535	2.03988	0.00344697	0.0718821
SP100	104.459	133.705	69.0647	110.723	146.105	136.623	111.905	43.3117	96.437	116.944	56.3964	96.3959	111.288	73.7723	132.764	130.818	95.8562	85.5849	95.4451	77.0716	50.8207	80.3746	143.297	86.7914	70.3024	74.1199	72.0976	41.8008	84.9426	84.6952	50.6735	63.8758	65.688	58.5672	0.0841566	0.447864	6.53371	0.00346261	0.0719935
PXN	173.054	135.926	177.948	246.372	128.535	78.4433	136.106	258.564	130.731	116.634	134.078	168.095	182.394	77.2087	140.976	223.437	207.688	175.954	146.282	231.771	249.11	178.121	202.02	228.288	174.921	232.418	202.774	174.263	215.112	207.112	187.504	241.759	204.434	426.561	0.0916334	-0.451803	7.59005	0.00345994	0.0719935
TNKS	8.61354	10.2743	12.6321	11.6485	6.84289	9.51758	9.29312	4.57058	6.44633	7.8583	2.91078	8.36493	10.3696	4.16752	5.20107	11.318	3.74214	9.7014	11.4534	10.7878	11.873	11.3497	14.5523	17.9484	10.477	10.5372	13.4203	6.31656	13.1304	11.9807	4.62826	14.66	13.1376	6.79619	0.0271302	-0.532526	3.55286	0.00350243	0.0727131
STX7	138.913	223.396	82.1087	114.23	158.126	364.124	163.017	97.941	127.637	174.33	136.443	190.8	198.041	186.515	196.683	128.271	149.973	132.098	135.03	116.664	99.0894	149.515	144.153	102.773	131.039	94.3562	115.003	128.932	140.058	130.008	150.003	110.866	112.471	101.943	0.0771707	0.419941	7.21265	0.00352692	0.0731129
UBA3	110.097	208.54	103.94	119.992	158.681	278.466	123.908	87.9293	128.798	178.569	154.271	199.962	178.135	161.144	180.942	124.876	126.081	109.107	126.791	123.67	64.913	147.662	140.216	90.8482	97.3301	117.347	93.7464	117.785	161.618	111.978	140.035	109.296	103.178	106.54	0.0713624	0.406186	7.11202	0.00354569	0.0733931
MAGOH	83.9429	92.6074	66.8678	63.6283	93.0263	81.0529	114.422	109.694	116.163	87.7855	108.608	63.2017	69.995	84.3739	93.7561	50.8369	66.6388	88.3757	76.3561	43.4849	73.0132	72.1518	81.4928	67.8596	50.7149	67.5341	63.5752	75.2414	56.4122	54.8028	82.9527	45.0272	49.8268	55.7688	0.054871	0.376729	6.28193	0.0036534	0.0755108
TMEM60	19.8894	14.4395	10.8471	19.9152	33.8445	89.1889	22.4584	15.2353	15.3423	38.5677	61.8541	33.8581	22.4984	31.7316	63.5078	26.0315	51.5263	17.0107	12.2572	27.5812	12.2059	19.9199	21.5716	10.2035	16.0952	15.8059	13.3224	30.0966	19.9388	19.8097	40.5863	23.6916	23.5516	25.5857	0.189467	0.68883	4.87972	0.00367963	0.0759406
PLA2G4C	3.91525	6.52556	1.51036	5.0101	4.80851	13.0483	14.9077	8.92352	4.89921	5.48013	7.45887	2.52276	5.18481	5.77603	6.29603	10.5635	10.9385	2.39213	7.0328	1.66822	3.32887	1.96883	4.9649	9.22005	4.40339	2.75405	1.37142	3.34406	1.62104	4.15173	4.15357	3.14143	8.17095	3.59798	0.0922753	0.776708	2.91195	0.00372558	0.0765863
FLT3LG	3.75864	3.88757	4.25647	6.01212	5.73323	7.52196	5.42099	8.27058	4.89921	5.06653	6.36733	4.51441	2.96275	7.75012	6.29603	3.11246	5.6132	3.0566	3.01406	2.66915	3.99464	2.77953	3.25286	3.19628	3.03682	4.78966	3.42855	4.08719	4.53892	1.89793	4.74694	1.57072	1.44193	2.79843	0.00165822	0.717434	2.66879	0.00374513	0.0765863
ZCCHC10	5.95117	15.1337	6.17875	12.4	13.3159	59.7151	16.8438	17.847	9.15378	15.7166	21.6489	23.767	17.7765	25.7362	16.835	11.1294	15.8321	8.63823	5.62624	12.2336	8.32217	10.3074	13.6963	7.62191	19.132	8.14241	7.44486	15.2341	12.3199	9.84552	19.2251	10.995	8.49138	11.7934	0.14335	0.666853	4.06292	0.0037485	0.0765863
TBL2	17.5403	13.19	11.8083	21.7939	15.1653	20.8773	12.1972	65.5117	11.9902	16.1302	14.9177	10.8877	10.74	16.8894	19.7093	14.6191	28.066	9.96719	10.4487	17.3495	8.87699	9.95996	9.92979	12.4163	13.5139	11.8544	9.79587	12.4473	9.40204	9.37104	15.7836	14.0056	9.45266	21.388	0.11978	0.624767	4.14962	0.00376025	0.0765863
PTP4A1	264.201	364.321	225.73	186.251	247.823	301.339	269.501	569.799	395.804	401.187	330.555	194.783	218.873	295.309	366.675	246.639	178.471	271.506	259.611	129.342	229.692	234.175	192.261	245.868	298.064	183.085	239.607	306.168	163.239	117.79	234.024	137.83	240.162	188.694	0.0938465	0.450039	8.03178	0.00372803	0.0765863
2020-09-06	97.8811	72.753	68.2408	96.8202	96.3552	88.7284	66.2135	112.959	121.964	83.7529	61.4902	70.6372	67.5878	81.6687	104.432	60.3629	99.8862	84.7875	79.9729	44.2634	77.6736	62.0761	61.9756	69.2118	59.218	94.476	49.0773	60.1931	77.1616	60.0221	47.232	68.4571	55.1138	69.1613	0.0508065	0.363739	6.29302	0.00374501	0.0765863
MYD88	218.471	218.676	141.837	225.83	215.458	175.001	133.976	206.982	226.395	179.19	197.205	204.343	182.58	185.199	237.333	135.628	202.651	175.821	186.671	122.781	163.448	168.509	144.496	137.44	104.315	199.968	90.2199	184.667	198.74	116.248	167.685	132.726	101.256	162.909	0.0539216	0.351456	7.45639	0.00372729	0.0765863
MYO5A	79.5578	98.8553	127.008	75.5273	65.0999	70.7678	82.6701	73.5646	74.1327	55.7319	48.7556	60.9445	88.327	62.0009	62.6866	92.9966	58.0031	83.8573	106.698	97.5351	93.0974	91.8401	90.5666	114.329	117.525	99.3854	96.8811	71.8973	83.1594	101.777	68.9492	112.175	95.6482	93.1478	0.049332	-0.355367	6.46308	0.00375355	0.0765863
CRTC3	51.5246	46.3731	52.3134	56.1132	39.0229	25.6361	54.4035	32.8647	50.1524	45.8056	29.4716	61.7412	54.1628	30.9274	15.3295	58.4766	34.5428	70.0361	66.5102	48.8231	80.7806	43.0826	49.8202	66.3844	60.1291	64.4209	76.5057	54.0623	68.408	49.5835	40.8236	23.0372	66.1687	72.7593	0.0780538	-0.450357	5.74929	0.00375492	0.0765863
CENPN	6.89083	12.9123	6.45336	10.2707	12.5761	13.3553	19.3607	20.8941	15.3423	11.7874	10.9154	7.56827	9.07343	12.2101	13.1395	6.03629	7.6282	9.83429	7.83654	2.78036	11.762	9.84415	7.36174	11.0641	9.56599	9.22009	5.97548	12.4473	7.29469	5.10069	8.30714	4.05768	5.12687	4.19765	0.0430878	0.556302	3.55728	0.00380942	0.0774749
RHEB	88.1713	132.733	93.2304	84.5455	91.3618	143.531	127.78	248.553	122.867	118.391	152.634	96.7942	123.417	106.308	133.038	70.1719	80.5998	97.6784	83.7907	59.8334	69.4624	109.56	98.0995	89.7418	147.741	75.4371	78.171	101.437	94.5067	62.9876	95.0574	64.9229	78.0245	80.7548	0.0778455	0.424427	6.72888	0.00386025	0.0779476
SNX30	52.4643	59.8408	75.518	81.7899	54.3732	49.2765	83.2509	43.9646	44.6086	26.1599	40.3871	58.1562	63.8843	51.9843	39.5555	56.0243	30.8007	64.0558	71.3326	69.0642	108.299	60.5705	81.8352	100.068	72.2763	91.9614	72.5874	52.2045	84.1321	87.5421	35.3647	61.7815	55.9149	48.5728	0.072728	-0.427399	6.02885	0.00385758	0.0779476
WDFY4	15.1912	17.0775	46.1346	21.5434	17.7545	10.4386	16.0694	16.9764	11.8612	9.92627	12.7347	14.4727	14.0731	21.7149	22.7205	26.3145	16.6957	11.429	26.5237	33.2531	30.4037	14.8241	23.9685	32.2087	20.1949	28.3787	24.7835	23.78	20.1009	19.0979	33.4659	39.5297	35.2472	27.9843	0.0889558	-0.524938	4.6222	0.00386056	0.0779476
NHS	9.39659	8.88587	13.8679	9.26869	9.43209	4.60528	12.0036	4.78823	9.79842	5.58353	4.54809	5.97495	9.35118	8.04257	5.33794	9.43171	3.59821	9.7014	11.0515	10.0093	9.20987	11.9288	11.1282	22.1281	9.11046	11.6149	13.8122	8.36016	11.0231	9.37104	8.78183	15.3145	15.5408	4.9972	0.0338724	-0.533993	3.55557	0.0038394	0.0779476
ZBTB16	10.3362	7.08092	21.8316	6.63839	10.3568	5.37283	15.2949	13.7117	3.60994	8.27189	7.09503	19.651	32.0347	9.87043	4.65359	24.5224	3.88606	14.087	12.2572	9.34201	21.7486	6.833	12.3266	21.8823	6.07364	25.3852	67.5915	13.3763	32.5829	11.5062	8.06979	23.8225	88.1181	15.3914	0.375637	-0.951119	4.30835	0.00384803	0.0779476
GTF3C2	33.6711	36.9319	31.1683	44.5899	29.7758	24.715	41.8191	16.7588	20.4993	16.854	22.5585	34.2564	46.6633	19.0828	25.0473	45.1779	25.7632	34.42	39.1827	49.7129	40.3903	42.9668	43.6569	38.2325	33.1014	47.5373	36.4406	23.5942	41.6608	55.6331	27.4136	54.5824	39.0924	36.5795	0.0581515	-0.421656	5.23728	0.00389528	0.0783463
PIP5K1B	12.5288	23.1866	29.9326	12.7758	14.9804	5.06581	19.3607	13.0588	20.2415	15.0962	13.8262	11.8171	12.8695	18.2786	12.4552	16.5055	10.5068	21.662	26.9256	25.4681	21.5267	24.8999	16.2643	21.8823	21.7133	22.2719	21.8448	24.5231	17.3451	16.6069	14.9528	16.8852	22.1096	16.7906	0.036081	-0.439335	4.34918	0.00389454	0.0783463
NM_001243749-T02545	10.9627	5.41482	6.72797	14.1535	10.5417	10.1316	13.7461	2.61176	9.79842	4.13595	4.73002	9.02882	12.5917	6.1416	4.92733	4.62154	5.46927	14.2199	16.2759	9.45323	19.7513	16.793	16.4355	14.875	5.61812	17.9612	6.56323	5.20188	13.7789	18.8607	7.71377	10.0788	8.01073	5.19709	0.0843095	-0.610637	3.60712	0.0039023	0.0783463
SH3PXD2B	1.25288	0.416525	2.19689	1.87879	1.47954	1.07457	1.16164	0	0.773559	0.516993	2.72886	2.12443	1.57396	0.877372	0	0.0943171	0.719641	3.3224	1.6075	1.77943	3.32887	1.38976	2.22564	3.93389	0.455523	3.23302	3.23264	3.90141	4.21471	2.01655	0.237347	0	0.320429	11.9933	0.192207	-1.24346	1.99592	0.00390274	0.0783463
CD72	1.5661	2.08262	0.961138	3.00606	3.8838	3.53071	4.84017	4.35294	2.06282	8.58209	3.63847	3.71775	2.49982	2.77834	6.98038	1.98066	5.90106	1.32896	2.00937	1.89065	0.887699	2.20046	2.91046	2.58161	2.12577	1.4369	1.37142	2.04359	2.59367	1.54207	2.72949	1.8325	1.44193	2.39866	0.00165822	0.851252	2.28459	0.00391416	0.0784629
RCHY1	15.3478	25.5469	13.8679	17.2849	15.5352	26.0966	19.1671	10.8823	19.5968	18.8186	20.7393	25.7587	23.0539	23.9084	17.1088	26.3145	14.6807	19.137	27.1265	27.47	17.0882	29.9957	33.8983	16.9649	28.3943	20.5955	32.7182	20.4359	32.745	30.4855	25.9895	24.477	22.9107	24.3863	0.0309343	-0.392487	4.63868	0.00394158	0.0787865
RP9	4.54168	4.85946	3.70725	8.89293	5.36334	6.90792	6.77624	2.82941	5.93062	6.20392	4.73002	4.38163	5.74033	7.75012	6.15916	6.79083	7.19641	6.77769	10.8506	7.89623	10.6524	6.94881	11.813	12.9081	4.70707	8.86086	8.03261	6.68813	8.59152	9.48966	6.05234	7.98447	6.72902	8.3953	0.00165822	-0.540671	3.20625	0.00393595	0.0787865
KIN	14.5647	17.6329	10.8471	14.1535	16.4599	45.1317	19.3607	16.5412	16.2447	29.055	23.2862	19.7837	18.7024	33.6326	36.1337	16.6941	19.1425	15.4159	10.8506	23.0214	7.54544	14.0134	14.2099	8.72831	14.2731	12.3334	11.951	16.5345	13.2925	13.5228	29.1937	18.9795	12.3365	12.1932	0.0891407	0.546291	4.349	0.00397512	0.0793433
C5orf43	62.1741	36.5154	20.0466	49.099	66.7644	65.8555	53.0483	159.97	57.3723	74.3436	80.0464	40.8952	34.442	54.0315	82.3959	43.1972	54.261	46.7793	24.3134	47.4886	31.9571	48.5259	42.2872	31.3482	52.2333	36.6409	27.2325	46.0738	29.9893	35.2304	73.1028	35.9956	38.1311	55.1691	0.122362	0.541302	5.74818	0.00400709	0.0797536
ZMYND11	28.9728	34.5716	24.715	22.6707	21.0835	23.4869	30.009	20.4588	42.4168	24.6089	27.8343	25.4931	31.5718	27.1985	18.3406	24.1452	18.2789	38.274	33.1546	28.8045	24.9665	31.6171	38.5208	27.906	43.8821	33.5276	37.1263	30.0966	31.7724	51.6	30.143	23.6916	29.4795	34.5806	0.0311263	-0.363824	5.00974	0.0040049	0.0797536
KCNH3	9.5532	4.9983	5.35491	6.76364	2.21931	3.99124	9.09952	5.87646	3.60994	2.17137	5.45771	8.89604	9.72153	4.0944	1.09496	4.4329	4.31785	11.429	7.0328	7.22894	11.5401	3.35859	11.1282	7.62191	5.9218	8.3819	7.24894	5.75922	15.562	16.251	4.50959	4.05768	9.13224	7.99552	0.058739	-0.653054	3.17431	0.00403956	0.0802855
PGAP1	4.54168	9.02471	5.21761	7.1394	8.50737	17.5001	4.25935	6.09411	2.19175	4.34274	4.54809	5.17829	4.90706	3.14392	24.3629	26.3145	6.33284	3.3224	7.0328	6.67287	2.99598	2.20046	10.2722	3.81095	2.88498	2.99353	5.58364	2.04359	6.48417	1.54207	2.84816	6.02108	6.5688	1.39922	0.244498	0.915904	3.09122	0.00407591	0.0805497
RAB8B	313.846	478.865	218.178	266.913	435.171	556.011	381.018	537.152	363.444	308.025	277.798	410.546	351.919	267.233	284.416	291.723	243.383	324.266	306.228	175.719	242.009	346.514	328.026	249.802	422.726	260.198	208.554	185.967	357.278	248.629	218.715	212.701	190.175	221.076	0.0754221	0.399609	8.28874	0.00407303	0.0805497
IDS	286.439	245.472	207.057	223.075	179.025	141.536	180.441	222.435	188.104	119.736	118.432	180.311	255.167	132.044	109.907	213.534	144.504	279.879	222.236	175.163	304.148	237.997	260.914	289.264	266.177	303.065	226.872	175.006	229.053	300.822	129.829	251.969	221.897	212.081	0.0699871	-0.389502	7.76102	0.00406104	0.0805497
SMCR7L	6.10778	1.80494	3.70725	9.5192	6.84289	4.45177	2.12967	8.05293	8.2513	5.06653	4.54809	4.38163	5.46257	5.26423	5.61168	9.24307	9.21141	6.77769	5.82717	8.4523	12.9826	3.70603	10.4434	9.22005	5.46628	10.4175	9.79587	6.13078	8.59152	8.42207	6.76438	13.2202	9.13224	11.9933	0.0189534	-0.56676	3.23018	0.00407239	0.0805497
DPH5	3.91525	5.69251	5.0803	4.13334	3.14403	3.83773	6.38902	5.65882	7.47774	6.72091	5.09386	6.2405	5.46257	6.43406	3.42176	3.20678	3.59821	7.70796	7.83654	6.45044	7.98929	9.26508	6.50573	5.53203	8.19942	5.86733	8.13057	8.73172	7.6189	8.06621	7.83244	4.71215	8.97202	7.79563	0.00165822	-0.574029	3.0631	0.00408782	0.0806709
MYL12A	448.374	725.309	307.427	307.245	598.29	813.446	428.258	485.57	478.833	564.04	576.88	508.269	504.686	443.438	658.346	396.792	530.52	441.613	611.853	288.045	278.959	441.134	561.718	354.296	314.007	312.046	363.133	401.473	468.319	351.117	445.5	335.217	319.468	402.974	0.0693952	0.380716	8.84959	0.00411257	0.0810448
PABPC1	2040.94	1382.86	3802.4	1725.86	1113.17	647.042	1697.74	3174.6	2204	2352.42	1321.68	1377.69	1631.46	1925.03	1364.73	2367.36	2243.7	2353.85	2096.78	3200.42	2770.73	2339.55	1892.14	2319.03	2955.74	2570.61	3092.26	2503.77	1892.24	2249.88	2300.01	2926.11	4184.17	3215	0.115344	-0.484627	11.1749	0.00411861	0.0810496
LRPPRC	42.128	41.3748	71.2615	38.9536	37.5434	37.1493	35.8173	35.4764	41.5143	31.64	26.5609	47.9324	42.3118	46.72	29.0165	52.6289	30.8007	47.5767	47.0193	76.0707	45.9384	67.5193	42.8008	45.2397	42.8192	57.9548	58.4813	46.2595	47.6586	53.1421	44.0278	63.3522	57.1966	40.1775	0.0467672	-0.3724	5.61178	0.00413254	0.0812094
FAM8A1	27.8765	38.7368	18.9482	30.9374	33.8445	30.3948	18.7799	27.6411	35.068	23.4715	42.934	27.0864	27.6832	24.2008	41.6086	41.4052	29.0735	26.845	32.7527	13.6794	20.75	19.9199	35.4391	24.7097	13.0583	26.5826	15.6734	21.7364	31.2861	22.7752	27.4136	18.0632	22.4301	15.991	0.0453363	0.406515	4.85919	0.00414239	0.0812887
SNRPB	291.921	303.508	267.196	207.293	256.886	325.9	245.881	412.223	317.03	313.298	348.384	299.013	338.124	310.37	348.745	208.063	323.407	258.482	215.404	201.521	237.459	252.937	258.859	209.602	200.886	197.214	237.256	297.807	260.339	214.466	295.615	207.727	238.239	299.432	0.0447369	0.312584	8.10767	0.00417554	0.0817635
MBTPS1	53.4039	43.0409	76.2045	64.3798	36.4337	41.601	40.2702	40.6999	47.8317	33.9148	28.7439	52.314	58.3292	30.7811	34.9019	64.3242	38.8606	55.4176	64.5008	60.167	65.8007	56.517	75.6719	66.3844	48.1336	66.3367	58.2854	37.5278	64.8417	71.6469	38.2128	69.2424	57.3568	56.5683	0.051071	-0.376279	5.79519	0.00417829	0.0817635
AGRN	2.66237	3.74872	1.51036	6.38788	5.54829	1.53509	1.74246	0.435294	0.902486	1.13739	5.27579	3.71775	2.22206	0.584914	0.27374	0.282951	1.43928	0.797375	1.40656	0.667287	1.55347	0.579068	2.05444	2.21281	0.911046	1.67638	0.587752	0.743125	1.29683	0.355862	0.35602	0.130893	0	0.99944	0.0671567	1.15833	1.87875	0.0042903	0.0837207
LPGAT1	86.292	82.1943	141.15	91.3091	83.0393	82.895	87.7039	69.647	114.1	72.7927	65.4925	106.089	87.0308	85.1782	81.7115	105.069	94.8487	96.4824	109.31	114.885	124.833	118.941	126.177	119.492	80.4758	112.198	128.522	106.453	131.953	93.9476	95.4134	109.296	109.427	125.33	0.0413595	-0.320826	6.70669	0.00429	0.0837207
NM_001146171-T19124	2.81898	4.85946	2.05958	4.38384	6.28806	15.8115	4.25935	3.48235	5.54384	3.10196	3.63847	9.16159	4.72188	7.96946	6.84351	3.77268	4.17392	2.25923	1.6075	4.22615	1.99732	4.2851	4.28008	1.72108	3.64419	2.75405	1.86121	3.34406	5.83575	2.25379	5.93367	1.70161	2.88386	1.99888	0.0556492	0.782785	2.66609	0.00430502	0.0837757
MAST3	41.0318	28.6014	44.6243	58.994	36.2488	31.3159	29.8154	56.3705	29.782	23.5749	30.3813	48.4635	31.2941	36.2647	37.3656	43.4802	29.7932	44.1214	41.7949	41.9278	94.7618	32.4278	38.692	54.3368	28.3943	73.4015	40.6528	41.615	68.2459	43.6524	49.1308	78.0122	49.3461	39.1781	0.0748369	-0.442384	5.54182	0.00430511	0.0837757
NBN	36.8033	53.7317	183.852	43.8384	49.3797	75.066	47.0464	69.647	62.9161	72.6893	46.5725	43.418	45.2745	125.83	116.75	61.9663	54.117	48.2412	40.1874	57.2754	38.8368	44.8198	28.9334	47.2067	53.9036	48.4953	48.3916	65.5808	37.284	32.6207	73.9335	51.1792	55.7547	36.1797	0.129411	0.544504	5.94747	0.00432467	0.0840071
TMEM8B	2.50576	4.44293	2.88342	2.25455	1.47954	1.38158	3.09771	2.82941	3.99672	1.24078	1.45539	3.85052	2.87017	0.877372	0.27374	1.22612	0.575713	2.65792	7.23373	4.11493	4.88234	2.77953	2.73925	4.54856	3.49234	3.83172	7.15098	3.71563	4.86312	3.32138	3.20418	1.43982	4.48601	1.79899	0.00165822	-0.808886	2.351	0.00432902	0.0840071
ST6GALNAC3	6.26439	14.8561	9.61138	7.26465	5.91817	4.75879	12.3908	4.35294	10.3141	4.13595	7.6408	9.6927	9.81411	5.19112	2.05305	8.20558	3.88606	7.97375	11.6543	11.3439	12.5387	12.2762	12.3266	12.0475	9.11046	7.90293	8.42445	9.10328	15.2378	11.9807	6.88306	8.50805	10.2537	10.794	0.0160859	-0.503012	3.46993	0.0043787	0.0848532
BET1	12.9986	21.2428	6.04144	12.1495	11.6514	46.0528	26.1369	6.9647	11.4745	20.9899	18.3743	27.6176	19.7208	20.9838	20.9411	7.45105	11.946	10.1001	12.659	15.57	6.99063	10.6548	11.9842	7.37604	14.2731	10.7767	9.11016	11.5184	18.3178	12.811	18.8691	10.2097	8.49138	5.79675	0.117683	0.609417	4.07245	0.00441093	0.0853595
TGFBRAP1	18.0101	11.8015	19.3601	18.5374	17.0147	11.0527	14.3269	12.1882	16.3737	15.6132	20.3755	14.6054	14.6286	18.7173	18.4775	19.9009	16.12	23.1239	20.0937	21.3532	22.4144	18.8776	16.6067	18.9318	18.2209	24.3075	23.706	23.0369	15.3999	18.7421	23.972	23.1681	21.9494	18.7895	0.0104068	-0.358291	4.37873	0.0044201	0.0854186
SGSH	25.9972	16.2445	22.93	41.7091	24.7823	17.193	22.652	45.7058	21.6597	11.9942	15.2816	36.248	29.7201	17.6205	11.7708	18.5805	16.5518	38.1411	28.5331	32.3634	53.4838	37.1761	24.4821	32.5775	26.2685	33.1684	25.959	23.0369	44.0923	31.7904	26.9389	23.6916	32.6838	28.1842	0.0705049	-0.463612	4.90376	0.004428	0.0854531
NT5DC2	2.81898	3.88757	5.21761	8.01617	3.32897	0.614037	4.64656	3.91764	4.77028	2.99856	4.18425	5.97495	5.64774	1.16983	1.91618	3.20678	3.02249	3.45529	6.22905	11.1214	10.0976	7.29625	5.1361	5.28616	3.94787	7.06474	5.28977	5.57344	7.29469	7.23586	2.13612	3.14143	5.4473	7.59575	0.0129343	-0.657227	2.81628	0.0044448	0.085659
KIAA0195	28.1898	20.2709	40.5051	46.4687	32.9198	23.3334	34.0748	27.2058	19.5968	19.5423	16.9189	32.3975	32.0347	16.3045	24.7735	37.7268	32.6717	35.3503	28.9349	41.5942	52.2633	32.312	34.0695	38.4783	36.1382	45.9807	29.8774	24.5231	44.7407	40.8055	22.5479	51.441	43.5784	35.5801	0.0535326	-0.407689	5.14806	0.00447937	0.0860877
USP48	26.6237	44.0128	28.5595	30.9374	31.9951	20.7238	43.7551	14.3647	41.5143	21.4035	18.5562	32.2647	33.8865	22.4461	26.2791	36.6893	16.6957	38.8056	60.2811	37.3681	32.1791	43.4301	47.4233	47.9443	33.1014	39.3949	39.6733	27.3098	37.9324	44.8386	22.5479	32.4615	37.9709	25.7856	0.0560645	-0.412853	5.16483	0.0044787	0.0860877
PNRC2	225.831	451.235	354.797	180.238	220.637	415.243	358.753	320.376	341.14	291.067	226.313	248.558	292.942	275.129	309.327	232.114	218.771	237.485	305.223	208.082	179.204	230.122	259.887	217.47	340.883	194.7	250.872	207.889	239.914	182.201	199.727	198.041	192.738	191.493	0.0606999	0.358051	8.04137	0.00449423	0.0862546
CYP1B1	49.4887	26.1022	60.8263	57.6162	20.7136	19.1887	28.8474	1.30588	56.4698	14.9928	32.2005	48.4635	35.9234	18.3517	1.91618	1.88634	6.76463	47.9754	40.3883	58.7212	205.391	37.292	31.6726	160.552	29.3053	174.343	54.1711	53.505	45.5513	55.5145	12.1047	1.9634	2.08279	83.5532	0.67527	-1.19602	5.60664	0.00455633	0.0873265
B3GNT5	78.6181	43.874	10.0233	8.39192	43.8315	35.6142	18.3926	150.829	63.6897	35.1555	22.7405	24.8292	24.9982	9.43175	16.5613	26.786	10.7946	46.6464	25.7199	3.33643	13.3155	25.5948	29.1046	15.7356	21.8651	28.7379	16.555	14.6767	9.72625	10.4386	12.4607	5.6284	36.6892	12.1932	0.371307	0.906496	4.91794	0.0046141	0.0879512
BRWD1	37.2731	66.644	63.1605	45.7172	37.3585	35.6142	57.6948	33.0823	52.9888	34.225	26.7428	45.9407	52.2185	38.385	37.5024	60.5516	24.1799	44.3872	58.2717	62.1689	62.6937	50.7263	64.0301	58.8854	71.9727	58.1943	81.0118	46.4453	71.4879	58.1242	35.602	67.6717	57.8375	31.3824	0.0617145	-0.40155	5.74225	0.00460766	0.0879512
ARHGAP35	24.5877	21.937	27.3238	25.5515	19.2341	12.7413	22.8456	15.6706	26.1721	12.8214	18.0104	13.4104	19.4431	21.0569	15.8769	19.2407	10.2189	25.1173	38.9818	22.9102	29.8489	25.8264	27.2213	31.3482	12.2991	39.3949	20.0815	21.3648	24.6398	29.4179	21.2425	23.6916	20.8279	18.3897	0.0417555	-0.416213	4.61936	0.00461141	0.0879512
RALGAPA2	44.164	46.3731	61.2382	42.4606	42.3519	33.0045	43.5615	20.2411	23.3357	29.055	22.0128	42.0902	54.5331	17.1819	34.2176	65.1731	27.0585	59.8031	54.6549	48.7119	54.5935	39.724	42.2872	58.3937	40.3897	58.6733	64.9466	42.3581	52.6839	58.9545	26.9389	75.918	55.7547	42.9759	0.0797878	-0.450258	5.56838	0.00461344	0.0879512
CSF1	11.1193	6.24787	3.43264	4.63435	4.80851	6.44739	6.77624	13.0588	7.21989	8.0651	6.00348	11.1532	5.36999	0.658029	6.70664	2.54656	2.87857	6.2461	3.41593	0.333643	5.65908	2.43208	7.70415	4.79443	11.8436	1.91586	1.27346	1.85781	1.62104	2.01655	1.06806	0.392679	2.08279	2.59854	0.166881	0.867618	2.78624	0.00462185	0.0879789
ATP6V0A1	50.1151	62.4787	55.6087	47.7212	57.7022	26.5571	52.4674	84.8822	43.1904	40.7391	42.7521	50.3224	50.2742	26.3943	40.5136	61.0231	52.3899	62.0624	70.127	69.7315	56.2579	64.2765	71.2206	70.81	113.729	49.9322	67.6894	43.4728	47.9828	76.1545	50.3175	77.2269	51.9095	58.7671	0.0616653	-0.39546	5.9066	0.00466645	0.088707
TCEA3	2.03593	1.24957	2.19689	2.6303	1.66449	5.98686	1.74246	3.91764	3.60994	4.03255	3.8204	5.17829	1.20362	2.26654	2.32679	1.98066	2.87857	0.930271	0.602811	2.00186	1.66443	1.38976	2.73925	0.737604	0.911046	1.79612	1.1755	1.48625	1.62104	1.66069	0.593367	1.70161	1.28172	1.39922	0.00165822	0.965915	2.06238	0.00469853	0.0891893
ARHGEF3	54.3436	72.6142	28.5595	74.4	79.3405	191.119	76.2811	37.4352	68.5889	76.9286	68.5852	92.0142	79.4388	82.8385	89.5131	82.1502	84.0541	50.8991	89.216	60.167	38.0601	42.851	80.2944	46.7149	61.0401	57.2364	49.861	45.3306	83.4836	63.5807	42.3664	61.3888	46.6225	36.7794	0.0990297	0.473552	6.13196	0.00471097	0.0891893
PABPC4	289.728	224.923	289.715	187.378	134.084	211.996	301.833	204.37	328.118	130.593	125.527	233.953	312.663	187.904	85.2702	156	110.393	350.446	281.513	213.977	373.388	300.42	309.536	235.787	416.5	393.231	314.741	231.855	256.773	339.255	163.413	216.89	239.681	167.106	0.106368	-0.466238	7.96013	0.00470639	0.0891893
GDAP1	7.04744	7.49745	6.72797	8.51718	11.4665	15.3509	10.6484	7.61764	7.99344	7.13451	8.00464	9.95825	7.03653	10.8209	11.2234	7.92263	10.3628	6.11321	8.43936	7.56258	7.87833	5.32742	5.99212	6.1467	5.46628	7.18448	4.40814	6.31656	6.15996	3.44	7.23908	7.4609	6.24837	5.79675	0.00165822	0.514113	3.29747	0.00472963	0.0894214
MLXIPL	0.783049	0.138842	0.274611	0.375758	0.184943	0.307019	0.774427	9.57646	0	0.103399	0.545771	0	0.277758	0.584914	0	0	0.287857	0	0.200937	0.222429	0	0.115814	0	0	0.455523	0.119741	0.0979587	0	0	0	0	0	0	0.199888	0.956665	2.19713	1.31494	0.00481523	0.0903067
TNFSF13B	339.687	542.038	240.697	320.146	384.496	585.484	269.888	256.17	356.869	365.307	433.524	416.919	389.88	325.578	501.629	450.836	310.597	326.126	371.533	184.727	281.289	293.356	467.385	297.377	157.459	284.985	253.615	259.351	483.719	225.379	306.533	239.272	231.35	229.671	0.0789023	0.400203	8.4086	0.00480107	0.0903067
EFHA1	25.3708	30.5452	23.3419	24.5495	31.0704	32.237	26.7177	39.3941	32.4895	28.3312	48.9375	26.5553	25.9241	38.8237	29.9746	27.4463	22.165	23.6555	22.7059	20.7971	21.7486	30.2273	22.77	18.4401	22.928	24.7865	24.9795	26.3809	23.8293	16.7255	34.534	18.0632	21.3085	22.3875	0.0288334	0.360578	4.86391	0.00481133	0.0903067
TPRG1L	40.7185	35.5435	23.3419	27.0546	29.9607	24.8685	33.3004	23.9411	37.2598	27.0905	47.1182	26.4226	38.7009	33.1939	34.3544	39.3302	31.6642	49.8359	29.9396	30.1391	37.8382	36.8287	39.548	35.5279	37.5047	45.0228	40.359	47.7458	38.7429	58.7173	46.52	46.0743	35.5677	39.9776	0.0312728	-0.340577	5.29435	0.00480451	0.0903067
SLC39A9	30.6955	23.0477	28.9715	32.4404	21.2684	31.9299	21.2967	18.9353	33.0052	16.7506	22.1947	38.7708	38.5158	32.1703	22.4467	37.8211	32.5278	31.0976	33.9584	38.9251	27.5187	40.6506	32.5286	27.7831	34.6198	40.7121	31.0529	32.5117	52.3596	39.6193	35.246	34.6867	33.6451	50.5717	0.0365185	-0.366354	5.1203	0.00478581	0.0903067
DCP2	31.7918	42.9021	60.0025	56.2384	27.0017	48.816	39.3022	24.5941	42.6747	30.5026	32.0186	52.314	35.9234	59.8075	40.3767	59.9856	52.6777	35.2174	47.6221	91.8631	54.4825	38.5659	57.0107	51.5093	46.9189	60.3497	62.8895	42.3581	70.1911	57.7683	51.1482	81.4155	61.0418	63.1646	0.0673632	-0.414541	5.72997	0.00481061	0.0903067
F13A1	78.7747	42.9021	225.73	187.002	38.2832	63.0923	138.042	219.17	251.278	454.954	152.634	113.391	137.398	171.819	28.6059	85.1683	60.7377	149.242	117.146	303.838	106.413	110.718	243.28	322.702	283.184	293.366	532.601	304.681	189.986	258.83	437.43	132.071	159.253	244.863	0.308525	-0.787422	7.65067	0.00483806	0.0906131
PTPN11	56.3795	44.707	112.179	64.3798	43.4616	28.5527	46.0784	59.6352	73.1013	45.4954	54.759	37.9741	45.7375	73.8455	61.7285	72.7185	55.4124	58.2084	75.5523	73.8464	81.7792	64.624	60.4348	70.81	49.1965	111.719	97.9587	79.7002	71.1637	64.0552	79.1551	86.913	74.3396	88.7503	0.0713521	-0.41075	6.12134	0.00491409	0.0919138
ERMAP	15.9742	14.3007	14.5544	14.6546	13.6858	12.8948	16.0694	12.6235	16.6315	9.92627	10.9154	15.6676	14.2582	9.65109	10.539	16.5055	12.5218	18.3396	19.089	15.4588	19.3074	17.372	14.7235	16.719	17.3099	17.123	17.0448	15.0483	25.4504	20.7586	8.54448	17.6706	20.187	17.9899	0.00697146	-0.375344	4.1513	0.00492488	0.0919926
MGC12916	14.4081	3.74872	60.9636	5.63637	10.3568	4.29826	4.84017	22.8529	3.35209	2.27477	4.54809	5.04551	3.51827	0.950486	6.70664	5.84766	1.15143	11.1633	7.63561	1.77943	2.99598	2.89534	3.76647	7.49897	3.49234	1.91586	3.33059	6.13078	2.43156	2.8469	0.35602	3.01054	7.04944	0.399776	0.555891	1.19303	3.14315	0.00495294	0.0920023
FANCL	2.34915	3.60988	0.549222	2.3798	3.69886	7.52196	1.35525	1.08823	2.32068	3.72235	4.00232	4.77996	3.61085	1.90097	4.24298	3.11246	2.87857	1.19606	0.401874	1.22336	0.998661	1.7372	3.76647	2.21281	1.51841	0.718448	0.489793	0.371563	1.13473	2.49104	2.01745	2.35607	2.08279	2.19877	0.00165822	0.915901	2.13847	0.00495073	0.0920023
BCL2A1	470.299	1181.96	825.618	198.275	381.722	675.594	559.524	474.252	464.651	350.625	436.253	402.712	423.025	384.801	267.308	253.902	254.321	492.645	628.33	88.5267	252.55	416.697	532.614	433.219	246.286	214.936	159.085	298.179	383.376	97.8621	218.003	112.306	153.165	329.815	0.218284	0.657208	8.60027	0.00496097	0.0920023
TTC39B	7.67388	10.552	6.31605	8.39192	7.39771	12.1272	8.5187	7.83528	5.67277	4.34274	6.9131	6.37328	5.55516	6.58029	7.8016	10.7521	5.18142	5.44873	5.82717	3.67008	3.32887	4.05347	8.04656	6.26963	4.09971	5.38836	5.77956	4.08719	3.7284	5.45655	5.69632	5.10483	5.60751	3.3981	0.00165822	0.566303	3.06267	0.00496576	0.0920023
MRPL45	23.4915	29.4344	35.0129	18.1616	20.5287	29.6273	29.8154	42.0058	34.4234	36.6031	34.9294	28.8125	33.0532	39.1162	23.5417	32.2564	46.3449	29.9016	39.5846	38.2578	33.7325	49.7998	40.7464	29.75	35.9863	29.6959	55.3466	42.7297	45.3892	39.7379	46.9947	35.472	48.8655	46.1741	0.0412829	-0.36868	5.26984	0.0049715	0.0920023
ZNF33B	13.6251	16.9387	13.7305	8.14142	8.50737	10.5921	9.09952	10.447	12.7637	14.4758	6.36733	8.36493	10.9251	10.7478	5.33794	13.2044	7.48427	11.9606	17.6825	16.9046	15.2018	15.9823	14.7235	10.4494	19.132	12.2136	20.9632	10.218	9.88835	17.2	9.73122	12.1731	19.386	11.3936	0.0237724	-0.448881	3.87925	0.00496721	0.0920023
LOC400027	4.8549	9.58007	10.9844	9.39394	7.58266	7.52196	11.6164	7.61764	9.66949	4.54954	8.36849	5.44384	8.33274	8.11569	5.20107	7.26241	5.18142	13.0238	12.0562	8.78594	10.7633	10.4232	13.6963	10.8182	11.8436	11.0162	9.69791	11.7042	9.56415	11.3876	8.42581	9.68608	10.5742	7.99552	0.00165822	-0.473154	3.50162	0.00495148	0.0920023
GAN	6.10778	4.58177	11.1217	5.88687	4.62357	2.45615	3.87214	6.31176	5.93062	3.41216	6.9131	5.17829	2.96275	5.26423	3.42176	6.41356	4.02999	5.05004	7.23373	8.67473	10.3195	5.90649	5.99212	6.63844	5.46628	13.6505	9.99178	6.87391	9.23994	6.64276	6.88306	8.24626	6.5688	6.79619	0.00430922	-0.558433	3.09377	0.00499579	0.0923296
CYP51A1	81.1239	77.196	28.2849	51.2283	59.3667	66.7765	61.9542	89.0175	73.3592	79.8238	50.3929	71.5666	71.0134	34.3637	68.2983	43.1972	37.2774	70.4348	44.0052	28.3597	46.9371	58.2542	39.8904	28.5207	92.4712	49.9322	41.4365	32.5117	43.1197	37.4841	31.6858	34.9484	39.4128	38.1786	0.0848395	0.447881	5.79431	0.0050491	0.0931915
NOMO2	24.1179	16.3833	27.4611	17.0344	24.9673	12.8948	7.93788	11.5353	13.2794	9.61608	14.372	13.9416	14.0731	10.1629	15.1926	19.4293	23.4603	24.7186	34.5612	25.1345	22.6363	21.7729	23.6261	22.1281	9.56599	30.8933	15.6734	11.7042	23.1809	28.2317	17.9197	32.3306	16.9828	20.5885	0.0636094	-0.475945	4.43189	0.00506722	0.0934027
TNNI2	14.5647	28.4625	11.259	9.89495	12.3912	16.7325	22.8456	53.1058	16.3737	15.5098	14.372	10.6221	14.9989	27.6372	23.2679	15.185	13.961	10.3659	12.86	12.1224	11.873	8.80183	7.36174	13.5227	22.4725	12.3334	10.6775	14.1194	8.42942	12.811	13.5288	17.0161	15.0602	11.5935	0.098276	0.560687	4.16897	0.0050879	0.0936602
GIMAP6	16.2874	16.2445	5.76683	22.9212	39.3928	64.4739	16.0694	8.48822	10.7009	18.6118	32.5643	28.547	19.906	27.8566	52.5582	39.5188	52.102	9.16981	11.4534	21.798	7.98929	11.2339	23.4549	10.9411	10.3252	15.0874	7.73873	13.3763	19.7767	24.08	30.0244	29.1891	18.4247	20.9882	0.213938	0.709611	4.6193	0.00515061	0.0946898
BCL2L1	35.3938	36.2377	21.2823	42.4606	46.4207	44.5177	42.0127	54.847	34.9391	41.0493	46.9363	38.1069	36.9418	39.1893	44.4828	30.0871	46.3449	37.6095	32.3509	32.8083	28.1844	29.5325	30.8166	26.9225	32.494	31.971	26.2529	36.9705	30.3135	26.571	38.2128	30.8908	28.8386	38.7783	0.0255365	0.322211	5.26116	0.00516922	0.0949071
PRKDC	34.2975	25.8245	74.8315	22.1697	27.9264	15.0439	28.4602	33.7352	50.2813	27.2972	38.7498	30.2731	33.1458	39.043	24.4998	48.1017	35.1185	29.7687	31.3462	74.5137	37.6162	41.9245	32.871	32.2087	46.9189	77.2332	66.7099	50.9041	35.9871	40.8055	56.6072	69.3733	49.6665	44.9748	0.101335	-0.492337	5.46361	0.00520307	0.0954033
SRP54	66.0893	123.014	60.689	59.8707	99.1294	120.965	89.6399	56.8058	59.1773	83.3393	65.4925	96.6614	85.2717	50.3758	87.1863	78.6604	77.4334	76.8138	81.5804	58.8324	49.6002	68.33	74.6447	53.7222	71.9727	55.3205	49.3712	38.2709	78.7826	72.9517	46.6386	63.2213	55.4343	46.5739	0.0576833	0.371369	6.19603	0.00524482	0.0960427
AHCYL2	10.8061	6.52556	20.3212	15.5313	7.02783	6.90792	8.13148	6.5294	7.34881	8.0651	11.0973	8.09938	8.05498	10.0898	8.07534	15.0907	10.9385	11.2961	10.8506	18.4616	12.7607	14.7083	11.6418	13.1539	12.6028	15.0874	17.3387	9.10328	17.183	16.9628	9.25652	17.2779	12.9774	11.1937	0.0270813	-0.466384	3.80354	0.00528463	0.096645
RFX3	9.39659	12.6346	19.3601	10.396	9.61703	8.75003	14.1333	13.4941	12.7637	12.0976	11.2793	10.091	12.8695	13.6724	9.85466	13.9589	11.2264	16.4791	17.0796	17.7943	13.3155	11.1181	15.2371	16.719	20.4985	12.4531	19.1019	13.562	14.7515	18.3862	14.8342	15.9689	16.0215	14.3919	0.00576376	-0.389963	4.01149	0.00530552	0.0969003
SLC25A29	19.1064	9.58007	31.5803	20.1657	13.3159	8.13599	25.3625	7.83528	24.625	7.7549	14.372	21.6426	24.813	12.5757	7.25412	12.4499	5.18142	26.1805	16.2759	18.3504	39.9464	15.519	31.6726	40.8141	27.3314	41.4305	22.5305	15.9772	24.4777	29.1807	20.1745	14.7909	7.36987	12.9927	0.143746	-0.614781	4.45544	0.00532296	0.0970919
STT3B	147.057	127.873	243.168	122.998	96.9101	79.0573	99.3203	181.735	187.588	135.142	136.625	111.665	120.547	170.356	112.781	179.108	129.248	164.658	190.287	197.517	129.049	183.101	149.289	177.148	170.669	193.742	239.215	161.258	159.673	170.339	171.246	174.742	213.085	207.884	0.0656987	-0.370664	7.35969	0.00535597	0.0974629
VCAN	937.78	851.794	1613.89	541.717	740.696	301.953	542.099	1333.3	1081.56	1521.1	689.127	646.888	838.273	677.185	845.721	1872.95	1030.24	1465.31	1492.96	1647.42	494.67	1141.23	991.61	1469.31	1650.82	844.776	2176.84	1118.22	739.195	1311.95	1263.99	1521.63	1912.64	2342.09	0.166715	-0.566611	10.2161	0.00535725	0.0974629
UBP1	60.608	74.0026	107.922	70.893	85.6285	83.0485	61.5669	135.376	60.7244	75.8946	65.1287	56.2973	61.94	72.0176	113.876	82.0558	77.7213	66.0492	58.6736	65.1717	54.2606	60.5705	60.9484	68.1054	60.2809	44.903	62.3997	65.395	59.168	51.3628	66.5758	64.9229	78.0245	56.5683	0.0509962	0.353056	6.19322	0.00538307	0.0976783
PLEKHB2	94.2791	85.2488	117.533	80.2869	74.347	74.9125	74.1514	129.717	68.0732	54.9047	64.2191	64.3967	85.7346	66.0953	61.7285	86.6774	76.5698	100.203	130.408	84.523	100.976	99.1364	100.668	104.986	100.215	114.233	88.6526	87.3172	89.8057	100.59	81.8846	105.5	95.8084	101.743	0.0436158	-0.323355	6.53355	0.00538048	0.0976783
IARS2	51.0548	53.5929	58.3548	47.8465	54.1883	30.0878	42.2063	40.2647	77.227	48.1838	38.9317	50.8535	50.6445	50.0833	38.7343	41.4995	43.7542	65.7834	90.4217	58.9437	55.4812	69.9514	49.9914	65.4009	41.6044	74.0002	63.7711	54.4339	58.1954	64.8855	51.5042	62.1742	51.7493	44.575	0.0401352	-0.334464	5.82731	0.00540182	0.0977645
ATP2B4	79.4012	70.5316	61.9248	52.9818	58.4419	60.4827	60.4053	27.4235	68.7178	46.426	33.474	84.5788	77.4945	41.0902	34.4913	57.4391	56.5638	70.8335	75.7533	80.1856	55.7031	78.5216	78.7535	70.6871	85.3347	65.4985	69.1588	54.6197	75.7026	115.181	52.2163	82.8553	49.6665	99.3444	0.0644016	-0.38944	6.09545	0.00539896	0.0977645
KIAA0317	37.5864	42.7632	38.3082	48.8485	36.9886	35.9212	47.0464	38.7411	26.5589	19.7491	23.1043	32.6631	37.3121	20.1064	27.1003	39.8018	31.3764	37.6095	57.6689	47.8222	51.7084	42.1561	46.5673	55.0744	38.1121	56.039	38.7916	30.2823	50.9007	43.5338	24.4467	46.7288	42.1365	35.5801	0.0435117	-0.3635	5.37588	0.00542608	0.0978234
BLMH	15.1912	13.4676	12.7694	16.6586	12.5761	6.75441	14.5205	18.5	25.1407	13.5452	16.1912	15.9332	16.11	10.894	10.8127	14.5248	12.3778	18.2067	19.089	16.0149	21.4157	18.8776	23.1125	19.1777	12.451	23.8285	22.0407	18.7639	22.0462	23.9614	16.0209	12.1731	18.1043	14.7917	0.0173875	-0.38936	4.23716	0.00542359	0.0978234
SPNS3	0.783049	0.694208	2.19689	2.50505	0.369886	0.614037	1.35525	0.870587	2.06282	1.34418	0.545771	0.929437	1.01845	0.731143	0.958092	0.565902	0.86357	2.79081	1.6075	2.55793	2.99598	2.66371	1.88324	3.19628	1.67025	2.63431	1.86121	2.78672	2.43156	3.20276	1.06806	3.01054	2.56343	1.19933	0.00165822	-1.05262	1.91291	0.00541903	0.0978234
HIST1H2BF	3.28881	2.77683	1.51036	5.26061	4.06874	16.272	4.25935	1.30588	4.25458	12.6146	21.467	15.0038	3.42568	6.72652	0.958092	0.565902	5.18142	2.79081	0.803748	1.66822	3.77272	3.24278	3.08166	2.08988	5.9218	1.79612	1.86121	4.27297	9.88835	3.44	1.66143	0.523572	0	3.3981	0.382023	1.0788	2.75481	0.00547715	0.0986169
CES2	19.8894	9.44123	19.6347	19.6647	17.0147	8.59652	13.7461	12.4059	12.6348	11.4773	13.0985	14.2071	16.4803	10.3822	13.687	25.1827	21.4453	15.6817	15.874	21.3532	20.639	15.7506	16.6067	23.1116	13.5139	25.5049	16.1632	16.163	23.8293	19.691	20.8865	27.0949	22.9107	28.584	0.033886	-0.416608	4.32021	0.00553527	0.0994072
WDR17	1.5661	2.22147	2.4715	1.37778	1.84943	1.38158	2.51689	1.08823	1.80497	1.55098	0.363847	2.12443	2.12948	1.75474	1.23183	2.16929	1.0075	2.92371	3.8178	1.44579	4.88234	4.63254	2.39685	3.68802	3.03682	3.83172	3.33059	1.48625	3.07998	3.08414	0.949387	3.01054	6.5688	1.5991	0.00165822	-0.874667	2.16187	0.00552831	0.0994072
GTPBP10	5.32473	12.9123	2.4715	8.51718	12.5761	18.1141	6.96984	1.95882	10.443	7.13451	6.18541	16.066	10.6474	9.35863	9.85466	5.28176	6.47677	4.78425	8.23842	4.55979	4.54946	8.10695	7.19054	4.05682	6.68101	6.10681	4.11426	2.22938	8.10521	7.47311	7.35775	5.10483	3.84515	3.19821	0.062362	0.626354	3.22122	0.00556503	0.0995812
GGNBP2	38.3694	51.0937	57.6683	51.3536	32.7349	32.544	58.2756	35.6941	48.8632	37.3269	32.5643	32.5303	53.6073	49.1328	44.2091	49.6108	30.6567	54.2215	102.679	48.0446	67.0212	51.4212	86.1153	69.2118	46.4634	49.4532	74.4486	33.998	49.1176	55.8704	33.2285	44.111	60.5611	40.5773	0.0642747	-0.400505	5.71896	0.00556634	0.0995812
CNOT1	60.608	59.1465	118.357	69.5152	67.1343	62.0178	58.8565	57.0235	54.6648	53.0435	59.8529	54.4384	64.1621	76.9894	68.1614	117.802	66.6388	75.0861	89.417	138.462	67.1322	73.1942	72.5902	90.1106	66.0509	89.5666	115.885	85.8309	59.6543	95.6083	80.4605	135.474	108.786	85.752	0.072818	-0.402317	6.36883	0.00555509	0.0995812
FRY	56.2229	66.2275	75.1061	67.5111	40.8724	44.9782	90.9952	34.6058	39.5804	30.5026	24.7416	56.5629	67.6803	39.8473	38.5974	85.7342	25.9071	68.1756	70.7298	68.5081	88.437	53.39	62.318	103.879	104.315	79.1491	72.9792	50.3467	76.6753	82.0855	27.6509	87.9601	87.317	42.5762	0.106882	-0.482238	6.0192	0.00558336	0.0996306
CSNK1E	14.5647	7.63629	22.3808	13.7778	9.80197	8.90354	16.6502	26.1176	17.7919	9.71947	9.27811	12.8793	18.4246	12.6488	12.8658	9.90329	4.89356	22.8581	17.4815	15.014	29.0721	16.793	12.8403	29.873	19.8912	21.4337	20.7672	17.6492	15.2378	21.2331	16.7329	11.9113	23.7118	7.79563	0.0663846	-0.497869	4.19732	0.0055768	0.0996306
APOBEC3F	11.9023	10.552	8.92486	15.1556	18.3093	24.5615	9.48673	8.05293	13.4084	18.922	14.7358	12.8793	6.66619	19.7409	27.5109	28.4838	27.6342	12.4922	7.0328	12.456	8.5441	10.6548	13.6963	12.4163	10.1734	10.178	6.95507	8.36016	11.8336	7.94759	15.1902	16.2307	14.5795	10.3942	0.0787894	0.535363	3.99264	0.00560237	0.0997151
PRKAB2	2.03593	3.3322	4.11916	4.00808	2.03437	4.29826	5.03378	1.52353	1.28927	2.79176	2.18308	3.85052	4.44413	2.48589	3.01115	5.56471	2.15892	2.12633	6.83186	9.2308	4.66042	2.5479	4.28008	5.7779	3.49234	3.23302	8.22853	1.30047	6.32206	6.04966	2.72949	5.36661	10.8946	6.39642	0.0281666	-0.715547	2.65655	0.00560013	0.0997151
TNPO3	44.3206	46.2343	55.6087	47.9717	38.838	36.3817	49.9505	26.1176	39.0647	38.4643	25.2874	37.443	45.2745	37.9463	35.86	49.7994	32.9596	50.6333	69.9261	60.2782	42.3876	48.4101	43.6569	55.3203	49.9557	53.1652	53.3875	32.1402	47.4965	59.5476	33.8219	62.5669	54.9536	45.1747	0.0394051	-0.33968	5.59062	0.00562874	0.100057
TTC7B	1.87932	2.63799	3.70725	4.38384	2.40426	4.75879	1.35525	3.91764	1.41819	4.23935	5.82156	3.71775	3.05534	3.50949	8.62283	6.22493	4.89356	1.32896	1.80843	1.557	1.55347	1.04232	2.56805	1.22934	1.97393	2.99353	1.76326	2.9725	2.91787	1.77931	1.54275	4.97394	3.04408	2.19877	0.00165822	0.790462	2.35497	0.00565405	0.100252
ZNF516	43.0677	28.046	60.689	53.9839	31.6252	15.1974	34.6556	24.1588	28.3638	26.3667	40.9328	35.9825	31.0163	33.267	20.1199	34.4257	25.7632	43.4569	37.3743	49.6016	75.0105	41.9245	35.6103	71.0559	39.175	50.7704	60.3425	50.9041	56.8986	29.7738	49.1308	27.0949	19.2258	40.1775	0.0880992	-0.463443	5.3948	0.00564965	0.100252
ADPRHL2	8.77015	10.6908	2.74611	9.26869	9.80197	14.5834	9.29312	4.57058	4.89921	8.99568	10.9154	12.3482	11.1103	14.3304	9.58092	9.14875	12.09	7.70796	5.82717	8.56351	3.99464	5.0958	6.84813	5.16323	8.5031	10.4175	4.01631	5.01609	9.88835	6.16828	11.274	4.71215	1.44193	6.39642	0.0310678	0.534609	3.34755	0.00570944	0.100342
N4BP1	25.8406	34.8493	29.3834	34.695	29.5909	54.4958	21.2967	28.0764	20.7572	19.1288	21.8308	26.4226	28.3313	26.1018	37.7762	34.4257	26.4828	20.466	29.1359	22.9102	16.5334	21.8888	32.871	27.5372	12.6028	24.068	14.9877	14.4909	33.0692	19.8097	25.3961	22.6445	18.9053	17.1904	0.0470966	0.402287	4.80662	0.00569582	0.100342
GSTK1	394.187	481.781	339.282	371.499	431.472	413.554	472.981	600.923	462.331	403.565	500.836	488.22	408.119	465.738	520.518	421.22	580.463	351.111	371.131	280.483	360.849	385.08	475.945	353.558	311.426	381.376	301.811	417.079	433.791	365.589	413.695	333.908	396.051	403.174	0.0397533	0.281237	8.71843	0.00570874	0.100342
HBS1L	11.7457	14.9949	13.5932	10.897	8.13749	7.67547	15.1013	10.447	12.1191	9.20248	10.9154	7.83382	11.4807	9.7242	6.84351	11.318	8.92355	11.8277	19.4909	14.9027	9.98661	15.6348	16.0931	13.7686	10.6289	17.3625	16.4571	13.7478	13.941	13.9972	13.6474	10.995	12.4967	13.5924	0.00435276	-0.407311	3.85896	0.0057014	0.100342
RPLP0	601.068	439.156	968.965	504.893	356.57	290.133	523.706	922.822	1057.33	568.176	742.977	428.338	513.76	848.784	421.15	423.201	791.749	667.403	785.664	916.852	1120.94	849.608	648.69	669.13	642.895	1039.24	964.501	1190.86	690.564	800.097	1239.78	463.1	487.373	1183.94	0.119508	-0.477256	9.53364	0.00569244	0.100342
TANC2	3.44542	4.72062	7.4145	2.75556	5.73323	3.07019	4.06574	7.39999	4.64135	1.96457	1.09154	3.9833	4.25895	1.31606	0.958092	4.52722	1.29535	5.84742	7.0328	6.33922	8.76602	6.25393	4.62249	7.49897	3.79603	8.50164	5.87752	4.27297	5.83575	6.16828	3.32285	4.31947	6.72902	2.39866	0.00165822	-0.634789	2.76299	0.00567411	0.100342
PMP22	2.34915	1.6661	3.29533	2.12929	0.184943	1.22807	0.774427	11.3176	1.41819	0.310196	0.545771	1.19499	2.68499	1.09671	1.23183	0.848854	0.287857	4.78425	2.61218	4.11493	5.881	1.96883	2.91046	3.44215	5.76996	2.87379	4.21222	5.75922	4.0526	3.08414	1.54275	0.785358	5.76773	3.99776	0.119136	-0.934398	2.28827	0.00569074	0.100342
CCDC43	27.0935	33.4608	13.8679	24.9253	30.8855	30.7019	38.915	31.9941	34.4234	37.7405	36.2028	37.9741	27.961	30.8542	32.3014	25.3713	33.1035	23.3897	24.1124	22.1317	18.9746	27.9111	23.7973	19.3006	30.3682	21.6732	24.7835	27.1241	24.1535	26.2152	33.8219	15.7072	25.4741	22.1876	0.0263668	0.345337	4.90504	0.00574413	0.100699
PDE3B	15.3478	15.6891	15.3782	8.01617	10.9116	9.51758	18.0054	9.35881	17.4051	11.9942	7.6408	14.4727	15.7396	14.6229	8.7597	16.3169	8.6357	16.4791	24.3134	13.9018	15.3128	16.793	17.9764	20.8988	11.0844	15.2072	20.9632	15.6056	19.2904	19.3352	12.342	15.1836	20.6677	12.1932	0.0186042	-0.409639	4.09245	0.00574314	0.100699
ATP6V1B2	303.666	302.397	334.339	291.588	208.061	304.716	373.855	246.158	170.054	162.336	166.278	219.214	281.369	162.972	184.775	400.282	278.789	381.544	447.286	506.248	260.207	267.182	369.457	286.928	397.52	353.237	306.611	175.378	374.461	393.702	221.207	404.721	335.329	279.244	0.0842685	-0.405456	8.24864	0.00575775	0.100811
MGAT4A	17.2271	38.0426	23.3419	20.6667	19.419	17.6536	30.7835	15.0176	27.5903	25.8497	18.7381	27.0864	29.5349	15.5002	16.835	18.6748	15.8321	30.566	30.1406	30.3615	20.639	36.018	36.8087	30.4876	25.3575	27.1813	31.6406	24.1516	34.8524	24.3172	25.0401	18.5868	25.1537	32.9815	0.0337245	-0.369606	4.78974	0.00580414	0.101496
NM_001169125-T00390	19.7328	41.3748	16.0647	13.1515	9.43209	10.8992	17.8118	5.44117	16.6315	8.99568	4.91194	19.651	22.3132	5.99537	14.5082	20.1839	14.5368	26.3134	25.9209	13.5682	25.5213	31.6171	24.6533	24.218	14.5767	22.8706	23.1182	19.1355	24.4777	22.0635	10.3246	22.3827	19.2258	26.3852	0.0963147	-0.534174	4.39071	0.00581166	0.101501
GCNT1	21.1423	17.6329	10.5725	26.9293	37.9133	54.8028	34.0748	12.1882	14.6976	42.807	38.7498	37.9741	19.906	32.6821	69.1195	24.1452	42.3149	18.6054	17.8834	25.4681	19.8623	18.8776	25.5093	16.4732	19.8912	19.3981	13.2244	19.1355	31.2861	24.6731	25.3961	31.807	20.9881	17.5901	0.117	0.541727	4.85451	0.00586077	0.102161
TM7SF3	31.0087	30.2675	36.386	29.4344	26.8167	30.3948	19.7479	15.8882	25.3985	25.0225	32.3824	31.6009	33.3309	25.2244	21.3518	30.5587	32.6717	29.37	32.9537	39.5923	26.7419	46.0938	37.6647	31.717	23.6872	34.246	34.1876	28.9819	33.8798	42.8221	36.0767	33.9013	37.0096	47.5734	0.0281749	-0.333142	5.08827	0.0058714	0.102161
CCDC69	372.418	314.06	290.401	311.879	224.706	219.979	351.783	214.164	257.724	177.019	166.096	298.748	308.404	163.191	167.803	400.47	306.711	375.298	395.042	252.346	353.526	282.353	416.195	458.175	300.342	422.807	352.455	202.13	556.99	394.651	150.478	392.548	311.778	391.181	0.0876036	-0.41195	8.30112	0.00587087	0.102161
EIF3F	303.666	207.985	447.616	270.295	174.031	135.702	207.934	602.446	414.757	292.825	319.458	197.837	234.983	403.299	259.78	304.738	432.217	338.486	336.369	470.993	422.101	359.369	304.571	295.042	353.942	496.089	450.806	583.725	296.651	311.142	502.819	425.141	587.507	599.864	0.11431	-0.467843	8.53621	0.00588039	0.10219
S100A12	1153.9	1329.69	609.911	539.087	452.925	639.366	919.439	740.652	897.586	799.582	1192.15	1165.51	990.022	578.48	664.368	759.818	1018	1608.17	951.236	621.244	663.555	1207.7	1864.75	957.164	677.059	711.384	1173.06	1798.18	2371.1	619.912	1456.72	496.477	1246.47	2453.83	0.156391	-0.542534	10.0391	0.00591278	0.102601
HTT	9.5532	9.02471	34.601	15.7818	11.8363	8.2895	11.2292	11.7529	8.38022	7.34131	11.0973	8.49771	9.35118	11.4058	14.3714	19.9009	11.5143	9.5685	15.874	31.8073	20.1951	12.2762	10.957	18.686	12.9065	22.5114	23.5101	18.5781	9.23994	14.3531	17.2076	23.4299	31.0816	21.7878	0.103388	-0.565532	4.15412	0.00591872	0.102601
CLMN	19.4196	29.9898	57.2564	24.299	23.3028	16.4255	27.2986	27.8588	33.6498	18.0948	17.1008	13.5432	20.4615	18.3517	20.1199	30.936	13.0975	29.2371	45.4118	41.0381	26.8529	21.5413	26.5365	58.5166	16.7025	34.4855	42.8079	39.1998	27.5577	20.1655	33.4659	22.7754	51.9095	38.7783	0.101153	-0.501717	4.97664	0.00596128	0.103211
MRPL18	25.8406	30.8228	11.3964	20.7919	24.5974	49.43	29.041	16.3235	27.9771	30.8128	32.7463	26.157	26.9425	30.1962	35.0388	15.6566	31.6642	20.2002	26.1218	19.5737	12.4278	25.7106	25.8517	18.686	18.5246	16.0453	14.4979	23.4084	21.8841	16.7255	28.3629	19.1104	17.143	21.388	0.0492371	0.413986	4.70807	0.00598736	0.103278
SPI1	768.798	665.607	860.905	768.675	758.266	585.331	581.207	1495.45	720.312	741.679	1122.47	609.711	598.753	920.728	934.824	727.279	987.78	679.364	458.739	516.146	680.199	459.201	579.352	606.556	693.003	563.623	550.724	822.268	693.968	457.876	717.025	724.362	575.811	876.909	0.0712704	0.367386	9.51615	0.00598152	0.103278
STEAP4	23.0216	73.3084	75.7926	26.8041	7.21277	4.14475	36.5917	3.2647	27.3324	16.4404	23.4682	26.0242	45.2745	19.2291	16.1507	28.7667	21.7332	54.6202	57.8699	55.3848	24.9665	39.0292	26.5365	39.7077	44.1857	39.5147	50.2528	38.0852	62.5722	32.2648	63.4903	29.5818	33.4849	73.159	0.234466	-0.700833	5.28364	0.00598062	0.103278
EPT1	4.38507	4.16525	1.23575	4.00808	6.65794	5.83335	2.9041	2.82941	3.09424	3.10196	4.18425	7.43549	4.35154	4.67932	4.51672	2.54656	5.90106	3.72108	1.40656	4.55979	1.88636	2.66371	2.22564	2.33575	2.73314	2.39483	1.27346	1.30047	3.07998	3.44	2.37347	1.8325	1.76236	1.99888	0.00165822	0.766346	2.42696	0.00602522	0.103803
MYO9A	19.7328	15.1337	41.8782	15.9071	15.1653	13.9693	17.231	13.0588	22.0464	17.9914	14.9177	18.456	21.7577	19.8871	14.9189	24.994	12.09	20.466	18.0843	32.5858	22.8582	21.8888	19.346	22.9887	28.0906	30.4143	33.4039	26.3809	22.2083	27.1641	17.445	33.5086	28.5182	19.1893	0.0497323	-0.42346	4.5975	0.00605699	0.104222
MED7	10.3362	22.3535	11.5337	11.6485	15.7201	34.6931	15.6821	38.7411	14.9555	25.9531	19.6478	19.3854	16.8506	19.7409	17.2457	15.185	14.6807	11.429	8.43936	10.1205	8.32217	12.392	15.7507	9.71179	25.3575	7.66345	16.4571	15.4198	17.8315	9.60828	13.7661	17.8015	12.1763	12.9927	0.0740647	0.508131	4.19987	0.00608424	0.104562
INO80C	11.5891	10.552	14.6917	13.402	14.9804	21.1843	10.842	12.4059	14.4398	19.4389	24.1959	11.6843	13.1472	16.7432	24.6366	13.1101	22.4528	8.90402	7.63561	10.4542	10.9853	12.5079	7.70415	8.97418	8.35126	10.2978	12.2448	17.6492	6.80837	9.7269	16.7329	13.2202	16.3419	15.1915	0.0393076	0.458548	3.98543	0.00611954	0.104978
RHBDF2	79.7144	57.2028	65.7693	90.3071	85.9984	53.1142	59.8245	77.9175	63.3029	64.7276	59.3071	79.1349	65.1805	58.2721	66.7927	65.6447	64.0481	64.4545	56.8652	50.0465	61.917	54.8956	49.9914	56.6726	42.3637	78.5504	42.4161	44.5875	64.8417	49.2276	60.0487	48.954	42.6171	60.766	0.0333444	0.303141	6.0003	0.00612346	0.104978
XRN1	68.9083	85.2488	83.3444	71.6445	106.157	133.707	74.1514	50.494	60.0798	66.1751	43.6617	91.3504	79.9943	59.6613	109.907	153.077	74.1231	54.3544	93.4357	53.8278	56.8127	63.0026	74.1311	76.0961	53.5999	48.9742	54.563	44.9591	93.0478	56.3448	50.9109	73.6928	64.2461	35.1803	0.0821239	0.421178	6.23051	0.00614642	0.105242
TAB1	28.0332	29.5733	24.715	33.1919	23.3028	18.2676	29.6218	16.3235	26.0432	24.7123	20.9212	32.3975	32.9606	20.6182	19.1618	27.9178	25.1874	33.7555	36.9724	37.0344	30.1818	29.6483	31.159	28.7666	40.9971	30.5341	31.4447	20.2502	31.4482	32.1462	23.3787	37.5663	32.2031	32.3819	0.0231701	-0.330328	4.95334	0.00617265	0.105433
SLC23A2	15.9742	19.0213	37.8963	25.301	26.0769	14.8904	30.3963	27.6411	15.9869	16.9574	16.3731	23.5015	18.4246	12.795	16.5613	29.8042	10.6507	18.3396	34.963	29.027	35.397	28.3743	26.1941	39.2159	37.0492	22.8706	40.1631	20.9933	19.9388	27.1641	16.1396	34.9484	38.6117	17.1904	0.0711825	-0.454194	4.76523	0.00616693	0.105433
SERPINB2	70.4744	36.9319	178.223	49.8505	41.982	37.7633	68.7304	78.5705	21.4018	41.0493	13.8262	59.484	19.7208	4.0944	4.37985	43.1029	20.2939	100.071	141.46	21.5756	300.708	70.7621	74.3023	543.614	96.8746	159.975	147.036	14.1194	30.4756	28.8248	5.815	4.45036	60.5611	24.986	0.754167	-1.21025	6.31266	0.00618079	0.105443
TUBA4A	58.5721	69.4208	25.6761	48.7233	31.8102	35.4606	51.8866	92.0646	65.6236	68.3465	36.9305	41.2936	44.9042	43.6492	46.8096	53.1005	59.7302	57.5439	111.922	54.2727	56.4798	46.7887	72.2478	96.2573	45.0968	56.9969	81.4037	66.6955	76.189	61.3269	49.1308	70.8131	84.7536	65.3634	0.074403	-0.410341	5.9628	0.0062484	0.106467
PLEKHO1	119.493	75.6687	86.5025	131.64	164.599	94.4082	93.1249	100.77	96.3081	129.042	135.351	52.314	57.3107	121.37	197.504	133.93	275.767	100.868	84.7954	96.3117	90.6562	56.8644	81.8352	92.8152	58.7625	68.1329	73.2731	96.792	54.9533	77.8152	105.857	111.652	100.615	119.533	0.114693	0.478468	6.74935	0.00629069	0.106598
RNPEPL1	99.7604	81.6389	95.5646	136.024	94.5058	54.4958	86.155	101.641	115.002	49.528	76.408	66.9195	94.3451	74.4304	76.5105	81.3013	97.2955	102.596	145.277	90.3061	156.235	74.0049	116.076	129.818	58.4588	149.677	91.7873	134.877	129.359	111.503	112.265	113.746	82.6708	104.941	0.0652518	-0.372303	6.68183	0.00627154	0.106598
PVR	21.6122	22.77	42.5647	25.1758	14.9804	10.1316	25.3625	15.8882	24.1093	20.8865	19.8297	19.1198	28.4239	29.0264	18.2037	15.7509	14.8246	22.3265	26.9256	34.8101	36.6176	22.9311	18.6612	26.9225	36.5937	30.5341	31.2488	39.5714	16.2104	28.3504	33.7032	26.1786	30.4408	26.1853	0.0558919	-0.417841	4.786	0.00629333	0.106598
ABCC5	9.5532	8.60818	10.8471	7.76566	5.73323	5.52633	7.93788	5.22352	7.21989	7.9617	7.09503	10.3566	7.77722	9.79732	4.24298	10.9408	4.6057	15.6817	7.63561	17.127	9.32084	7.29625	8.04656	12.2934	12.7546	8.3819	16.653	11.3327	5.99785	9.01518	9.73122	12.3039	14.5795	6.19653	0.025616	-0.497927	3.51539	0.00629447	0.106598
YOD1	7.20405	13.6065	6.17875	10.897	9.43209	9.67109	13.5525	18.2823	8.50915	5.68693	6.54925	9.95825	10.9251	8.62749	6.56977	9.05444	7.34034	12.8909	23.7106	9.45323	17.754	10.6548	23.7973	20.0382	9.56599	9.33983	13.8122	5.945	22.3704	14.1159	5.69632	11.3877	13.9387	8.99496	0.0626876	-0.530743	3.78291	0.0062836	0.106598
TP53INP1	1.25288	1.38842	2.74611	4.00808	1.66449	5.52633	1.74246	3.91764	1.67604	2.06797	3.45655	1.59332	3.33309	3.65572	2.7374	3.20678	1.0075	2.79081	7.63561	4.44858	5.43715	2.89534	4.79369	4.17976	2.88498	2.39483	6.07344	4.64453	4.53892	5.81242	2.37347	4.18858	7.04944	3.79787	0.00165822	-0.740959	2.49176	0.0063019	0.106598
POLK	20.9857	35.5435	21.4197	27.1798	34.9542	67.3906	27.2986	22.2	27.8481	27.4006	20.0116	31.6009	29.3498	29.7575	29.9746	27.6349	17.5592	23.1239	29.7387	20.6859	16.3115	20.0357	30.8166	22.4969	22.6243	19.7573	19.1019	14.6767	34.204	21.4704	18.157	20.812	21.4688	13.9922	0.0549216	0.41649	4.79567	0.00631672	0.10672
ADAR	465.758	412.221	452.971	436.38	474.563	464.212	236.975	372.611	337.143	481.838	359.481	304.059	366.733	405.931	688.32	683.044	536.277	348.586	472.001	368.565	253.549	274.826	428.008	404.945	237.783	372.515	321.304	265.11	248.992	264.524	373.584	462.969	308.894	315.823	0.0752415	0.377507	8.62744	0.00635422	0.107224
IL6R	90.9903	89.414	92.6812	109.596	87.1081	65.395	84.7998	139.512	60.4665	48.1838	69.4949	81.1266	93.2341	49.1328	83.6277	110.728	86.9327	102.197	89.6179	148.026	114.291	94.6197	97.9283	106.584	107.352	141.295	85.1261	76.5419	100.505	122.654	82.5967	124.479	114.714	126.529	0.0612717	-0.362079	6.63873	0.00638478	0.107609
LAMTOR3	79.2446	108.435	49.5673	65.2566	62.3257	184.058	78.6043	125.365	90.5064	95.437	93.1449	102.504	102.215	126.049	105.116	47.8187	65.9191	74.023	53.4493	55.8297	56.9237	86.1653	53.9291	47.3296	68.4803	81.9031	45.1589	86.9456	87.8605	56.4635	127.099	55.2369	47.5838	63.1646	0.0966175	0.447275	6.37765	0.00641269	0.10782
IARS	21.4555	20.5486	34.7383	29.4344	20.5287	17.6536	25.9433	18.7176	20.1125	21.9205	18.9201	27.7503	30.2756	22.2267	18.0669	30.5587	20.7257	21.662	23.1078	44.9306	26.1871	34.3966	29.1046	23.1116	25.5093	36.4014	32.5223	23.78	32.4208	32.2648	26.7015	35.7338	29.1591	30.1831	0.0311732	-0.356199	4.86083	0.00640924	0.10782
SLAMF8	5.32473	4.30409	4.11916	10.396	6.473	3.53071	20.3287	5.87646	4.51243	7.03111	9.46003	8.49771	5.55516	4.38686	10.8127	11.2237	26.6267	7.04348	5.4253	6.78408	3.99464	3.93766	4.10888	3.44215	3.18866	4.43043	1.95917	8.54594	8.26731	2.72828	3.44153	5.36661	5.76773	9.59463	0.1471	0.730391	3.18012	0.00646052	0.108363
CFL2	1.40949	1.52726	1.64767	5.63637	0.924714	2.30264	3.09771	2.17647	1.54712	2.48157	1.45539	4.51441	5.2774	2.0472	4.10611	4.90449	1.87107	1.72765	6.02811	2.66915	5.32619	1.85302	7.36174	4.91736	2.42946	1.91586	8.62036	2.41516	8.42942	7.35449	2.01745	7.33001	5.76773	4.9972	0.0425048	-0.775463	2.54511	0.00645889	0.108363
ITGB7	19.8894	14.023	19.2228	28.1818	43.4616	29.3203	11.81	50.7117	46.6714	39.2915	52.7579	21.6426	16.7581	22.4461	68.4351	19.335	48.3599	16.612	27.1265	19.5737	15.4238	14.3609	18.8324	21.0217	21.4096	32.6894	18.8081	28.9819	18.3178	21.3517	38.0942	20.812	13.458	23.7867	0.133928	0.561786	4.88363	0.0065138	0.109126
LMO2	5.16812	1.11073	0.823833	3.13131	5.54829	2.14913	0.58082	0.870587	1.9339	2.99856	9.09619	2.12443	1.57396	1.82786	8.21221	1.1318	2.59071	2.12633	0.200937	1.22336	1.10962	2.89534	1.02722	1.47521	2.42946	1.31716	0.293876	1.85781	1.13473	1.18621	2.13612	1.30893	0.480644	1.39922	0.111523	1.03148	2.08384	0.00653653	0.109344
AKAP7	14.4081	13.6065	19.772	17.0344	19.0491	16.272	15.2949	22.4176	17.0183	21.6103	21.2851	15.1365	14.0731	30.7811	29.564	17.0714	13.6732	14.2199	14.4675	9.34201	12.6497	14.3609	9.41618	15.4897	8.80678	17.2428	18.4162	19.3213	13.7789	12.2179	22.4293	10.7332	12.0161	9.59463	0.037386	0.425585	4.20884	0.0065425	0.109344
AKT3	110.253	97.7445	125.223	90.6829	69.5385	114.978	69.892	47.8823	123.512	93.0588	35.1113	116.578	77.1241	73.0412	88.9657	118.462	89.0916	134.225	95.0432	109.657	127.052	125.426	169.149	88.7583	142.579	105.492	139.689	79.3286	138.113	95.8455	67.9998	181.287	91.1621	147.717	0.0855235	-0.415989	6.76247	0.00655488	0.10942
CNIH4	78.1483	107.88	80.1864	72.897	93.951	290.593	89.6399	129.5	91.4089	103.605	180.832	132.246	93.8822	172.769	169.172	95.3545	143.784	77.6112	98.2582	78.1838	71.4597	72.4993	124.807	82.9805	62.8622	88.1297	83.1669	90.1039	124.334	73.3076	127.099	91.8869	90.2009	114.536	0.0981884	0.442302	6.79998	0.00656991	0.109503
ST6GALNAC6	9.70981	18.8825	5.76683	10.7717	11.2815	4.9123	12.778	7.83528	10.443	5.68693	6.9131	7.16994	7.86981	4.82554	4.92733	6.69651	8.05998	11.8277	24.3134	6.45044	19.5294	10.8865	18.3188	22.1281	9.11046	11.8544	10.1877	9.47484	10.3747	13.8786	5.3403	9.16251	8.65159	9.59463	0.0702479	-0.550323	3.65264	0.00657552	0.109503
ABAT	14.7213	15.6891	14.9663	16.0323	11.4665	11.0527	11.6164	9.57646	13.7951	13.1316	9.64196	11.1532	14.3508	9.43175	10.9496	13.5817	10.2189	12.0935	21.0984	22.1317	12.0949	14.4767	20.7156	18.0713	17.158	12.8123	14.9877	15.2341	12.482	16.8441	11.1553	20.812	16.8225	14.5918	0.010326	-0.381771	4.04124	0.00658661	0.109557
STAT4	1.72271	0.555367	4.39378	1.25253	3.51391	2.91668	0.968034	3.48235	0.902486	0.723791	1.09154	0.79666	1.38879	0.584914	2.46366	3.3011	1.87107	0.531583	1.40656	0.222429	1.7754	0.347441	0.684813	1.10641	0.607364	0.957931	0.685711	0.557344	0.162104	0.711724	0.71204	0.785358	0.640859	0.599664	0.00165822	1.20859	1.74191	0.00666725	0.110283
TMEM237	1.72271	0.416525	1.51036	1.87879	1.10966	6.90792	1.35525	3.69999	1.54712	2.06797	3.8204	1.46054	1.01845	3.14392	1.23183	1.60339	1.0075	0.265792	0	0.222429	0.998661	0.579068	0.684813	0.61467	0.759205	2.0356	1.27346	1.30047	1.29683	1.30483	1.54275	0.654465	1.1215	0.599664	0.00165822	1.10288	1.82101	0.00666545	0.110283
HSPB1	18.48	2.36031	17.7124	10.6465	5.73323	48.2019	10.842	62.8999	10.9588	34.6386	38.3859	6.50606	3.88861	51.2531	37.2287	5.37607	28.4978	8.77113	3.21499	15.1252	3.88368	4.16929	5.1361	3.81095	13.0583	8.9806	9.20811	23.78	5.83575	4.27035	45.8079	7.06822	3.52472	21.5879	0.528332	1.04557	4.27711	0.00666976	0.110283
FDXR	3.44542	1.94378	1.78497	4.25859	11.4665	7.98248	3.48492	2.17647	4.25458	7.7549	5.82156	4.77996	4.07378	3.87506	8.07534	2.82951	7.34034	2.25923	3.21499	3.114	3.66176	2.08464	2.56805	2.58161	2.12577	3.4725	2.25305	3.52984	1.62104	5.10069	5.22163	3.40322	2.40322	1.79899	0.0244913	0.723137	2.60022	0.00666069	0.110283
NCF1C	98.1943	60.2573	77.8522	45.2162	57.3323	28.5527	67.3752	45.0529	63.174	105.777	60.9444	76.8777	56.0145	41.602	67.477	50.0824	90.387	83.7244	62.0895	35.255	33.9545	37.5236	37.3223	52.0011	30.8237	49.5729	50.4487	45.7022	53.9807	57.2938	77.375	21.2047	30.1204	25.5857	0.102797	0.469134	5.85328	0.00665072	0.110283
CBX7	4.07185	2.49915	6.86527	5.13536	2.21931	3.07019	5.6146	1.95882	4.51243	2.06797	4.36617	2.78831	3.79602	4.0944	2.46366	4.05563	2.15892	4.78425	4.01874	5.89437	8.5441	2.66371	3.76647	8.48245	2.73314	8.86086	4.99589	7.24547	7.6189	5.33793	5.57765	6.80644	3.68494	4.79731	0.00165822	-0.629186	2.74698	0.00667762	0.110283
HIST2H2AC	42.7545	44.4293	34.8756	58.6182	38.6531	83.202	50.1442	40.4823	61.2401	78.7898	93.6907	67.0522	54.2554	59.3688	47.0834	13.5817	104.06	40.1345	21.0984	34.0316	52.1523	44.125	30.303	48.5589	30.6719	48.7347	28.6039	47.1884	68.2459	36.891	59.6927	12.3039	10.7344	43.5756	0.149453	0.555884	5.65679	0.00671322	0.11061
PDCD10	74.8595	123.708	74.2823	88.6788	91.1768	211.229	91.576	102.512	96.6949	107.121	121.343	133.839	118.417	138.625	143.44	73.6616	107.658	77.4783	80.5758	81.6314	64.913	100.989	92.7922	65.8926	75.0095	87.2915	62.8895	105.152	127.576	67.1393	117.724	75.0017	67.6106	97.7453	0.068973	0.378558	6.6656	0.00670594	0.11061
REPIN1	5.16812	3.88757	5.35491	9.39394	6.65794	3.99124	5.8082	0.217647	6.05955	3.20536	5.82156	5.84217	7.12912	3.80194	1.64244	2.54656	3.74214	9.5685	8.03748	6.11679	12.8716	9.84415	10.4434	12.0475	4.40339	13.0518	5.58364	5.75922	9.88835	11.269	4.27224	1.17804	0.160215	5.79675	0.0933564	-0.693393	3.04845	0.00674766	0.111046
CEPT1	27.7199	30.5452	35.8367	29.6849	35.1391	72.1494	26.5241	25.9	29.911	44.7716	45.6629	37.1775	26.6648	62.8052	45.1672	28.6724	32.5278	23.1239	24.1124	36.7008	16.6443	36.2496	21.058	17.8254	23.0798	22.3916	20.1795	29.9108	26.0988	22.1821	53.759	29.0583	26.115	31.7822	0.0808918	0.452229	5.11839	0.00677428	0.111147
NM_001042553-T19125	18.7932	33.4608	20.1839	25.5515	26.0769	48.6624	31.7515	25.6823	23.8514	23.1613	26.9247	38.5052	26.8499	34.9486	27.7847	21.7872	25.6192	10.6317	24.3134	14.2354	19.1965	25.7106	33.2135	15.7356	21.7133	22.7509	14.6938	23.4084	39.0671	14.5903	23.8533	19.3722	16.0215	19.589	0.0507562	0.4081	4.74958	0.00680944	0.111147
DDX39A	41.9714	27.3518	38.0336	57.1152	34.2144	38.0703	36.9789	89.2352	27.0746	42.9104	30.3813	39.4347	41.2933	28.9533	44.7566	38.67	51.5263	29.1042	22.304	32.4746	36.1737	31.6171	26.0229	31.8399	44.4894	27.5405	28.506	27.3098	31.124	25.9779	23.972	29.4509	41.6558	42.1764	0.0593149	0.397885	5.28287	0.00680505	0.111147
INTS10	23.9613	35.5435	38.3082	30.9374	24.2275	29.4738	42.0127	26.7706	35.5837	29.4686	28.0163	28.1487	34.2568	32.0241	30.1115	36.0291	23.0285	31.3634	62.0895	39.7036	29.405	45.6305	46.0537	38.3554	41.4526	32.0907	54.465	32.1402	42.7955	39.5007	30.6177	27.3566	35.2472	34.7805	0.0339494	-0.33939	5.22779	0.00678128	0.111147
CS	70.0046	46.0954	94.0543	71.0182	59.9215	49.43	57.3076	90.3234	53.1177	49.1144	53.1217	52.8451	64.4398	54.7626	52.0107	81.3956	85.4934	69.5045	80.1739	72.1782	86.8835	80.143	76.0143	91.4629	56.6367	75.3173	77.3873	66.5097	67.2732	87.0676	69.7799	99.3478	125.288	90.5493	0.0543728	-0.351217	6.23373	0.00676403	0.111147
RPS8	1583.79	1796.33	1621.99	1349.47	1014.97	1118.47	1792.02	2480.74	2565.64	1348.01	1723	2117.12	2029.67	2090.41	1156.28	1223.76	1442.59	1971.51	1664.76	1513.41	2890.79	2625.03	2269.99	1616.83	1738.43	2520.32	1960.84	2811.61	2837.47	1803.04	2506.98	1496.76	2090.48	2147.8	0.0756825	-0.370394	10.9171	0.00680801	0.111147
RPL6	705.997	1112.4	861.592	548.481	536.889	385.615	1179.07	1197.27	1544.93	665.887	1092.27	619.27	927.897	1236.44	646.712	582.219	620.187	1191.15	1460.01	842.561	1009.98	1248.93	1349.77	907.007	1086.12	995.65	1401.59	1758.61	968.572	1050.15	1472.62	818.474	968.498	835.932	0.103358	-0.433822	9.97951	0.00680142	0.111147
ADORA2A	9.39659	6.80324	38.5828	2.25455	2.5892	3.53071	2.9041	10.0118	7.47774	3.61895	3.45655	2.52276	3.24051	6.28783	2.46366	2.45224	1.43928	7.04348	2.81312	1.66822	4.43849	3.12697	1.19842	2.82748	4.25155	5.38836	1.1755	5.75922	3.40419	1.18621	1.66143	4.05768	1.44193	0.99944	0.372381	1.01973	2.77091	0.00683858	0.111492
HIST1H2BB	1.5661	1.11073	0.961138	0.876768	1.47954	2.60966	0.58082	1.08823	1.67604	4.23935	11.6431	5.17829	1.01845	3.50949	9.17031	1.98066	4.6057	0.265792	0.401874	0.333643	0.665774	1.38976	0.684813	1.35227	1.67025	0.83819	0.587752	1.67203	2.75577	0.711724	1.89877	4.97394	1.60215	1.19933	0.252689	1.13265	2.10345	0.00687217	0.111909
RBX1	91.1469	108.713	130.44	73.7738	125.391	243.773	76.4747	251.164	87.4122	208.142	263.789	103.566	101.845	231.041	322.466	138.174	272.456	68.3085	54.0521	118.666	64.4691	91.956	81.1504	71.0559	79.5647	85.3756	97.5668	187.639	95.8036	62.3945	217.884	140.972	142.591	182.898	0.194717	0.603991	7.14778	0.00691553	0.112409
PPP2R2A	46.5131	72.0588	33.6398	52.2303	49.7496	89.4959	57.8884	52.6705	78.6452	50.4585	33.1101	59.484	50.089	56.8829	48.3152	45.9324	39.2924	43.4569	61.4867	28.2485	35.7299	41.1138	53.5867	40.937	53.1444	54.0034	38.4978	27.8672	59.3301	37.3655	36.5514	35.472	27.8774	22.3875	0.0604374	0.382591	5.64036	0.00691893	0.112409
HGSNAT	49.1755	61.9234	86.9144	48.8485	35.509	37.9168	49.3697	77.047	68.7178	34.4318	63.8552	78.471	62.1252	55.8593	42.4298	70.2662	45.9131	58.2084	46.0146	71.1772	84.6643	71.2253	59.5788	63.5569	83.6644	71.9646	83.3628	86.7598	81.2142	77.8152	59.4554	85.2114	69.8536	74.5582	0.0552301	-0.356164	6.07678	0.00695452	0.112855
NCF1	597.623	594.103	470.271	290.711	497.311	400.199	569.01	218.953	334.564	463.329	320.368	510.659	377.936	134.092	581.562	406.507	679.773	458.756	492.497	268.917	213.381	270.309	652.798	374.949	267.544	294.205	232.064	277.929	295.678	352.541	231.532	254.325	136.823	219.877	0.129074	0.485974	8.56868	0.00699994	0.113461
BAZ2B	23.6481	24.8527	58.6294	28.5576	24.0426	18.7281	26.9113	26.5529	18.5654	20.2661	14.5539	15.2693	23.5168	16.7432	23.6786	44.8949	20.8696	24.7186	40.7902	42.8176	33.5106	23.7418	27.2213	39.7077	43.4265	26.7023	46.7263	28.6103	27.8819	32.1462	21.3612	36.2574	57.3568	34.5806	0.0853951	-0.46183	5.01801	0.0070094	0.113482
RELL2	7.04744	6.24787	2.4715	6.38788	12.5761	8.90354	8.5187	3.2647	7.60666	6.30732	5.27579	9.55992	6.11067	6.72652	6.02229	2.54656	8.20391	6.5119	6.22905	3.22522	3.77272	5.67486	3.76647	5.53203	2.73314	5.38836	3.42855	4.08719	5.83575	4.62621	3.20418	4.71215	1.60215	4.79731	0.00165822	0.572888	2.93223	0.00706306	0.114219
GUCY1B3	2.03593	1.6661	6.86527	2.75556	5.54829	13.2018	0.968034	1.52353	5.80169	2.79176	4.91194	4.64718	1.11103	8.11569	7.11725	1.41476	2.44678	1.46185	1.00469	2.66915	2.55213	1.04232	1.19842	0.122934	0.607364	2.87379	0.881628	3.52984	3.56629	1.30483	4.27224	7.33001	0.801073	0.399776	0.213106	0.977323	2.39331	0.00710663	0.114427
DNMT1	46.0433	43.874	35.8367	50.9778	77.676	44.5177	48.7889	34.6058	48.8632	61.3154	63.4914	47.6668	41.1082	42.6988	71.9938	53.3835	66.9266	49.0386	41.1921	40.8157	32.9558	37.7552	43.3144	44.8709	50.4112	41.5503	36.2447	45.888	30.4756	33.0952	50.4362	47.6451	28.9989	32.5818	0.0438897	0.343655	5.60533	0.00709589	0.114427
TPM3	1868.35	2721.3	2081.41	1517.94	1933.76	2232.64	1998.22	1908.98	2528.12	2649.59	2036.27	1827.54	2016.06	2188.31	2978.16	1650.93	2052.13	1876.49	2345.74	1448.35	1313.13	1714.85	1997.94	1560.4	1911.68	1268.18	2019.03	1778.67	1703.07	1549.07	1679.11	1706.19	1500.41	1864.16	0.0490011	0.296816	10.9285	0.00710456	0.114427
ZYG11B	20.6725	21.1039	21.6943	18.0364	20.7136	13.6623	19.9415	12.4059	23.8514	21.3001	17.8285	17.261	18.6098	20.9838	14.6451	16.5998	15.2564	21.662	26.5237	23.5775	20.528	22.8153	20.3732	27.2913	18.2209	25.5049	25.1754	24.7089	18.1557	20.0469	26.7015	23.0372	23.7118	22.7872	0.0107285	-0.324234	4.5259	0.00710872	0.114427
DDX47	11.7457	16.7998	7.5518	10.6465	16.275	25.7896	13.5525	8.48822	12.8927	19.5423	16.3731	22.0409	16.4803	23.1041	16.4244	13.0158	13.0975	13.8212	11.4534	11.4551	5.65908	19.225	10.6146	7.00724	14.4249	6.70552	8.71832	11.7042	10.3747	12.6924	18.0384	12.3039	7.53009	5.59687	0.0517953	0.476805	3.94939	0.00712417	0.114544
TSHZ3	7.9871	9.71892	5.35491	5.88687	4.99346	3.3772	7.74427	2.61176	6.44633	7.9617	4.73002	11.9499	10.1845	3.29014	8.07534	7.92263	5.6132	9.4356	9.44404	6.45044	12.9826	10.6548	11.813	10.4494	7.59205	11.2557	10.7755	7.98859	10.0505	8.65931	6.05234	10.3405	6.5688	8.3953	0.0042582	-0.485957	3.34131	0.00717291	0.115195
GALNT10	23.4915	12.4957	31.5803	31.6889	15.9051	19.3422	14.9077	21.3294	21.5307	11.4773	12.7347	16.5971	15.4619	23.1041	20.2568	26.9747	27.4903	20.0673	26.9256	29.3606	31.2914	17.8353	23.2837	23.1116	14.1212	47.6571	24.5876	19.1355	33.0692	35.2304	24.9214	41.1004	24.5128	29.7833	0.0650528	-0.437231	4.71315	0.00724907	0.116285
MYC	10.4929	5.55367	34.7383	3.88283	9.61703	4.9123	7.93788	32.647	15.3423	7.03111	5.27579	8.49771	4.6293	4.24063	10.2653	3.20678	6.04499	6.77769	2.81312	8.78594	3.43983	8.33858	4.10888	6.02377	10.3252	2.0356	3.52651	4.45875	2.91787	3.67724	9.25652	6.54465	7.85052	4.79731	0.246847	0.832951	3.33034	0.00725932	0.116316
DLG4	43.5375	32.3501	43.8004	49.6	41.2423	22.4124	37.1725	72.0411	39.7094	45.7022	32.3824	36.6464	36.5715	26.4674	26.5528	44.8949	55.8442	51.5636	55.2577	46.5989	60.5854	46.9045	42.2872	61.467	46.9189	51.2493	60.4405	50.9041	46.686	44.72	37.3821	42.4093	70.4944	55.369	0.0493827	-0.354719	5.59843	0.00731306	0.117043
SLFN12	0.939659	3.74872	1.23575	3.75758	4.25369	3.99124	5.22738	1.95882	2.96531	3.20536	5.09386	5.04551	1.94431	1.75474	4.79046	2.26361	1.58321	1.46185	3.01406	2.11307	0.776736	2.5479	3.42407	1.84401	0.607364	1.07767	1.46938	1.85781	1.78315	1.89793	1.06806	1.43982	0.961288	0.199888	0.00165822	0.901515	2.15029	0.00739009	0.117068
LOC220729	5.32473	3.47104	6.45336	4.00808	5.91817	5.06581	2.51689	9.35881	5.02813	10.5467	5.09386	3.05386	4.81447	5.48357	5.0642	4.4329	2.015	3.45529	1.6075	3.22522	3.55079	2.77953	2.73925	1.72108	6.37732	2.75405	3.72243	3.52984	1.62104	3.08414	3.67887	4.31947	4.64623	1.19933	0.00454094	0.665105	2.64241	0.00736033	0.117068
SLIRP	78.4615	145.645	44.487	61.8748	67.3192	133.707	105.516	127.323	114.487	84.0631	172.1	118.835	116.473	125.683	122.773	54.6096	73.2595	72.1624	74.1458	50.4914	52.5961	107.243	112.652	52.124	58.6106	76.7542	63.1833	105.152	93.0478	55.2773	122.352	54.1897	49.6665	61.5655	0.106465	0.456657	6.51381	0.00737699	0.117068
CASP2	30.0691	41.9302	33.2279	40.0808	32.365	28.0922	45.8848	14.5823	42.6747	42.1867	32.3824	32.132	43.5154	49.6446	43.7985	34.0485	33.8231	40.2674	59.0755	73.1791	29.1831	35.2073	40.5752	37.1261	52.0815	45.1425	50.7426	42.9155	40.2018	56.1076	53.047	53.1426	47.4235	36.9793	0.0520681	-0.366002	5.46521	0.00738422	0.117068
NFRKB	14.7213	17.0775	16.8886	21.4182	16.275	15.0439	22.2648	15.8882	9.66949	11.684	6.73118	13.5432	17.9617	14.0379	13.0027	27.6349	10.9385	15.5488	20.8975	25.1345	24.8556	12.9711	21.2292	25.0785	22.6243	22.5114	22.4325	14.1194	19.2904	21.3517	13.1727	24.6079	27.3967	15.7912	0.0377436	-0.409009	4.34396	0.00737814	0.117068
NDST1	40.8752	48.0392	53.8237	65.5071	54.7431	25.7896	62.7286	72.9117	52.602	24.8157	34.9294	67.8489	38.0528	21.8612	34.3544	82.1502	49.5113	56.8794	76.1551	53.1605	77.5627	53.6217	76.5279	82.7346	49.1965	111.12	55.3466	51.833	102.936	51.7186	24.6841	63.4831	87.6374	62.9647	0.103065	-0.463275	5.9191	0.00733576	0.117068
KLHL11	6.57761	3.60988	4.943	6.38788	7.58266	6.6009	5.8082	2.61176	5.41491	7.4447	8.91426	4.11608	5.55516	9.28552	5.0642	6.41356	6.90856	7.30927	7.0328	12.9009	7.43448	5.44324	7.70415	10.2035	8.04758	10.2978	14.106	8.54594	6.32206	9.37104	10.7993	6.67554	7.53009	6.39642	0.0045742	-0.505146	3.24193	0.00734307	0.117068
LOC100505702	6.26439	13.19	7.68911	2.88081	2.5892	5.37283	4.64656	3.2647	6.83311	3.10196	3.45655	4.24885	9.2586	4.53309	3.55863	5.37607	3.59821	8.23954	10.2478	8.34108	3.77272	9.26508	8.73137	5.28616	6.37732	6.22655	7.83669	8.9175	7.9431	7.35449	8.30714	5.75929	6.88923	10.794	0.0107526	-0.538232	3.10007	0.00736214	0.117068
OLFM1	8.14371	3.05452	7.82641	11.1475	0.554829	1.38158	3.48492	3.04705	8.50915	2.58497	4.54809	3.9833	15.647	12.3563	2.18992	6.97946	9.78712	16.7449	2.00937	12.6784	10.9853	8.5702	12.1554	3.07335	9.2623	11.1359	5.6816	9.28906	12.3199	13.6414	15.5462	7.85358	11.8559	9.59463	0.156981	-0.711476	3.36444	0.00735236	0.117068
SERPINB9	322.46	352.936	934.089	251.006	274.825	183.29	251.689	206.764	178.821	162.336	169.371	178.717	289.516	163.191	241.85	472.717	313.188	288.783	269.256	142.021	211.827	202.326	225.304	197.924	157.307	217.81	164.766	151.04	254.017	179.948	131.253	256.289	190.976	228.072	0.141012	0.506532	7.97906	0.00740591	0.117186
SOGA1	11.7457	5.97019	26.6373	14.1535	14.0557	6.75441	9.48673	9.7941	9.41164	12.8214	14.7358	10.7549	8.98084	14.9884	16.0138	13.0158	11.2264	13.9541	8.64029	21.4644	29.2941	12.2762	5.99212	15.9814	17.0062	18.6797	19.5917	20.2502	10.5368	13.8786	24.5654	19.2413	22.9107	21.7878	0.0760968	-0.502148	4.10092	0.00742106	0.117293
SP140L	127.794	171.747	70.0258	134.396	143.146	307.019	161.274	63.9881	118.612	129.559	60.9444	194.651	144.712	89.1263	128.521	143.079	121.475	112.031	118.151	79.9632	104.859	115.119	145.865	104.002	106.896	82.1426	84.8322	62.6083	138.275	111.859	55.0644	93.3267	94.046	75.1579	0.102394	0.442481	6.91125	0.00744151	0.117483
C14orf119	9.5532	21.3816	3.98186	9.01819	12.3912	23.9475	13.3589	9.57646	8.63808	19.7491	31.2909	27.8831	21.1096	14.6229	21.3518	16.7884	26.1949	9.4356	6.83186	15.9037	3.32887	12.8553	14.2099	5.16323	10.477	3.59224	6.46527	10.7753	17.6694	16.251	18.3944	13.0893	12.1763	12.1932	0.133857	0.604482	4.02718	0.00746519	0.117682
EMG1	16.2874	20.9651	12.3575	14.2788	21.4534	43.9037	26.5241	12.6235	19.2101	23.5749	26.9247	26.8209	21.2022	25.2244	21.3518	16.6941	20.2939	14.6185	16.6778	20.1298	11.651	16.6772	18.3188	9.22005	17.9172	10.178	13.6163	16.7203	14.7515	19.691	24.5654	18.9795	12.9774	15.3914	0.0472822	0.4245	4.40034	0.00747938	0.117682
KIAA0100	58.7287	47.0673	106.549	67.8869	75.6416	36.6887	40.851	44.6176	36.873	41.1527	52.394	46.4718	50.089	48.9866	62.9603	103.183	77.8652	54.7531	77.1598	101.428	77.7846	55.3589	70.8782	83.841	58.4588	71.0066	93.2567	68.9248	58.1954	76.2731	67.6438	124.872	107.985	79.1557	0.08722	-0.424007	6.15974	0.00747317	0.117682
RPL7	1705.17	2087.48	2164.48	1431.39	1115.76	1331.08	2378.85	2247.86	2968.28	1806.68	2184.9	2031.48	2221.14	2316.7	1397.45	1449.56	1773.05	2305.88	2000.13	1821.03	3024.61	2751.85	2741.31	1722.18	2149.16	2862.66	2533.6	3157.72	2580.86	2017.38	2605.36	1873.47	2247.65	2527.18	0.0653725	-0.340092	11.0977	0.00749468	0.11779
DPP8	21.4555	19.1601	20.3212	19.6647	16.6449	16.7325	16.6502	9.35881	21.9175	19.4389	16.3731	18.8543	20.4615	20.7645	20.3937	23.3906	19.5742	18.6054	26.5237	26.1354	16.8663	27.4478	21.7428	25.2015	24.9019	31.492	24.1958	20.2502	21.2356	26.4524	22.3106	27.6184	20.8279	19.3891	0.0143087	-0.331624	4.5573	0.00750667	0.117846
YWHAH	60.4514	63.5895	38.0336	64.7556	64.1752	93.7942	71.0537	53.7587	52.7309	82.2019	81.3199	60.5462	58.2366	60.5386	97.041	25.8429	63.4724	48.507	60.482	56.8306	53.8167	46.0938	52.3882	54.8286	46.4634	44.0648	34.3835	53.8766	41.6608	61.92	57.3192	39.5297	30.2806	56.9681	0.0584177	0.36589	5.89322	0.00753762	0.118199
ATG4A	20.6725	24.0196	14.2798	18.7879	21.2684	36.3817	20.5223	13.4941	15.0844	27.4006	21.8308	21.1115	25.0908	20.5451	21.3518	22.0702	20.006	15.0172	15.874	17.3495	11.5401	20.0357	18.3188	13.5227	15.0323	17.4822	18.6121	17.6492	14.2652	16.8441	19.5811	16.6234	17.7838	14.9916	0.019126	0.359713	4.40633	0.00756153	0.118441
SELK	68.1253	103.159	64.3963	27.9313	57.7022	74.452	48.5953	158.447	62.7872	86.1311	94.7823	46.3391	49.2557	56.7367	70.625	44.5177	73.9791	52.2281	44.0052	22.2429	42.4986	59.8756	47.4233	51.5093	52.8407	46.3399	57.6977	83.23	29.503	21.589	64.0836	32.7233	66.8095	60.3662	0.120962	0.492581	5.96004	0.00757617	0.118488
POLR2B	61.0778	72.0588	76.3418	52.9818	62.5107	45.8993	61.1797	47.0117	45.1243	52.4231	46.9363	56.5629	67.31	64.1212	57.3486	77.2457	44.4738	61.3979	90.4217	105.209	51.1536	82.6909	62.318	59.0083	73.6429	62.1458	87.0853	65.2092	64.0311	85.4069	74.4082	82.5935	72.7375	52.9703	0.0463243	-0.328922	6.09433	0.00758573	0.118488
LRP1	358.95	214.927	576.271	346.449	342.699	203.707	204.062	310.147	257.466	203.695	145.175	330.348	267.944	151.347	228.71	457.343	330.315	300.079	310.448	522.041	391.586	382.185	275.98	487.433	247.805	478.606	398.594	283.502	328.585	450.166	271.999	490.456	483.848	495.123	0.105567	-0.436422	8.43431	0.00758995	0.118488
SLC2A1	11.4325	7.49745	2.88342	18.2869	17.7545	7.67547	6.00181	141.688	17.6629	15.303	10.5516	10.3566	5.64774	4.02129	9.71779	6.60219	6.18892	9.96719	7.23373	1.89065	10.2085	7.29625	16.0931	5.4091	16.8544	13.5308	5.97548	13.0047	4.0526	6.64276	5.45898	4.58126	6.08816	10.9938	0.506737	1.01901	3.92736	0.0076311	0.118556
LMNB1	53.0907	91.4967	24.715	70.0162	93.5811	64.3204	59.4373	25.9	63.3029	81.9951	58.9433	51.9157	47.404	36.3378	117.298	82.2445	104.78	62.461	101.071	35.4774	32.401	41.8087	63.0028	66.8761	33.1014	41.191	36.9304	32.3259	43.606	44.4828	36.5514	37.3045	30.7612	56.1685	0.122584	0.496419	5.88591	0.00761394	0.118556
IMPA1	11.5891	23.0477	10.8471	15.9071	25.1522	30.2413	17.4246	12.8412	14.3108	15.0962	16.9189	21.2443	17.5913	20.9107	20.8043	13.0158	11.2264	14.7514	13.2618	12.0112	9.65372	20.9623	9.75859	10.6953	14.8804	13.6505	10.5795	12.2616	11.9957	11.8621	22.4293	11.1259	11.8559	7.59575	0.0379667	0.425306	4.12197	0.00763915	0.118556
SNRPC	74.3897	69.8374	40.5051	43.9637	61.9559	105.921	66.2135	67.9058	75.6799	66.3819	62.2179	82.7199	80.6424	54.4702	69.8038	49.4221	68.0781	57.5439	60.8839	34.2541	48.9344	63.4658	77.8975	55.1974	40.8452	40.7121	42.2202	55.5486	56.2501	58.9545	64.677	46.3361	38.6117	54.1697	0.0468885	0.333421	5.96525	0.00760566	0.118556
CCDC12	48.549	54.1482	40.917	50.7273	50.4894	71.6888	59.8245	63.9881	52.3442	67.6227	52.394	48.3307	46.5707	59.9537	58.4436	44.8949	69.6613	51.4307	53.0474	43.1512	43.1643	40.1873	51.8746	46.2232	53.4481	45.6215	37.2243	38.6425	42.3092	41.28	43.7905	52.7499	34.7666	45.5745	0.02718	0.287073	5.72112	0.00764524	0.118556
KCTD15	36.1769	17.3552	31.8549	37.3253	17.5696	16.4255	24.2008	5.22352	26.6878	14.8894	22.0128	30.4059	32.9606	30.708	22.8573	20.8441	13.2414	34.9516	22.304	30.584	41.278	30.6906	28.7622	37.3719	25.2056	44.5438	26.7427	31.2113	34.6903	45.7876	33.2285	39.3988	15.2204	22.1876	0.0788871	-0.451124	4.91331	0.00763123	0.118556
HAMP	0.15661	0	0.274611	0.250505	0.184943	0.460528	0.193607	22.8529	0.515706	0.206797	0	0	0	0	0.13687	0	0	0.265792	0	0.111214	0.332887	0	0.342407	0.122934	0.303682	0	0.0979587	0.371563	0	0.118621	0	0.261786	0	0.799552	2.0841	2.36599	1.51906	0.00766023	0.118657
TM2D2	6.89083	4.9983	4.11916	8.26667	11.6514	16.579	7.55066	4.78823	6.05955	12.4078	12.9166	9.95825	8.79567	6.6534	16.6982	4.62154	11.8021	5.98031	3.41593	11.7887	3.21791	6.48556	8.04656	3.68802	4.25155	5.98707	2.35101	6.87391	4.37681	5.93104	11.1553	4.84304	4.3258	7.39586	0.0676797	0.603946	3.26478	0.00772828	0.119409
WDR91	15.3478	24.0196	22.1062	21.6687	12.7611	14.8904	28.6538	28.7294	9.28271	9.51268	11.0973	17.261	29.6275	11.0403	6.56977	21.6929	8.6357	27.6423	29.9396	23.1326	31.6243	24.8999	19.5172	30.1188	33.405	22.8706	22.4325	9.28906	29.0166	28.2317	11.8673	25.1315	34.4462	10.9938	0.100691	-0.511424	4.52703	0.00772249	0.119409
C16orf74	7.51727	6.38672	8.23833	5.76162	2.03437	3.68422	7.93788	5.65882	11.2166	7.9617	9.09619	5.44384	5.55516	6.58029	2.46366	2.26361	3.02249	9.03692	8.23842	10.3429	10.9853	8.22276	8.21776	8.72831	5.9218	9.69905	14.0081	12.0758	6.15996	8.42207	11.63	4.31947	3.04408	7.39586	0.0295893	-0.542427	3.23063	0.00773438	0.119409
FMO5	19.7328	34.7104	30.6191	19.0384	12.3912	10.5921	33.3004	8.05293	18.0497	13.8554	9.27811	17.7921	27.5906	10.0167	8.21221	25.0883	14.105	24.7186	39.1827	30.8064	19.0855	29.5325	34.7543	30.2418	21.7133	18.7994	30.857	11.3327	29.9893	30.7228	13.5288	18.8486	34.6064	23.5868	0.105645	-0.512061	4.6128	0.00776184	0.1197
ADARB1	4.38507	4.02641	2.4715	7.26465	8.13749	6.90792	5.22738	10.447	3.22316	4.85974	7.6408	5.7094	4.81447	3.65572	5.33794	7.63968	7.91605	3.58819	5.62624	2.00186	3.55079	3.12697	4.9649	6.39257	2.42946	3.11328	1.76326	2.78672	5.18733	2.25379	3.08551	3.01054	4.16558	6.59631	0.00165822	0.617845	2.78205	0.00779073	0.119896
GAB1	23.3349	29.4344	24.8523	24.299	19.6039	20.7238	32.1387	12.6235	28.7506	15.82	14.0081	25.8915	36.2937	28.9533	17.1088	27.1633	17.2714	30.0345	31.949	29.3606	28.4064	24.205	27.5637	28.6436	37.0492	33.4078	26.057	30.4681	33.3935	41.9917	24.9214	31.807	26.5956	19.7889	0.0339003	-0.355364	4.85372	0.00780885	0.119896
IREB2	73.6066	77.196	133.461	81.9152	52.3388	51.2721	66.0199	70.7352	93.2139	77.6524	59.3071	76.8777	72.4022	81.5225	76.5105	126.291	68.0781	79.6046	113.128	132.456	81.4463	82.5751	74.8159	97.6096	93.3823	122.136	164.766	70.7827	106.989	104.03	70.492	126.704	103.018	104.342	0.0722526	-0.381313	6.54803	0.00780415	0.119896
2020-09-11	14.8779	5.83135	15.2409	9.39394	10.9116	5.83335	13.9397	21.547	11.3455	17.1642	10.0058	7.9666	12.5917	12.9412	10.1284	10.4692	13.961	15.8146	13.4628	18.5728	13.4264	11.3497	14.2099	14.1374	35.8345	18.7994	17.6326	15.2341	13.4546	34.0441	10.4433	15.1836	10.5742	15.3914	0.0715327	-0.50089	4.05964	0.00780496	0.119896
CA2	8.61354	13.8842	10.5725	5.88687	14.0557	19.6492	3.87214	18.7176	14.5687	6.72091	23.6501	6.10773	5.18481	18.2055	31.0695	4.90449	8.34784	9.7014	6.63092	6.22801	3.77272	12.1604	5.99212	4.42562	12.6028	4.9094	2.44897	11.89	2.43156	3.20276	18.8691	10.3405	4.48601	4.59743	0.215509	0.755151	3.59823	0.00783737	0.12012
OLFML2B	4.54168	1.11073	2.6088	3.75758	3.32897	11.0527	5.42099	3.2647	5.28599	5.37673	4.18425	5.7094	3.42568	9.35863	4.37985	1.41476	3.74214	2.52502	0.803748	1.11214	2.77406	1.38976	1.88324	1.35227	3.3405	3.4725	1.46938	3.71563	4.37681	2.60966	3.91622	4.45036	2.24301	4.79731	0.0294363	0.715495	2.51556	0.00784061	0.12012
PDE4DIP	2.03593	1.52726	4.39378	7.01414	3.8838	4.75879	4.25935	1.30588	1.28927	2.58497	4.00232	3.9833	3.79602	3.80194	2.7374	5.65902	3.45428	4.65135	3.41593	8.11866	5.99197	3.01115	2.56805	7.86778	7.44021	4.19095	6.46527	5.01609	4.53892	6.16828	4.86561	9.68608	6.88923	2.99832	0.00165822	-0.62907	2.72815	0.00785625	0.120227
BOLA2B	43.5375	69.8374	40.3678	50.9778	55.6678	69.8467	55.9524	75.7411	50.5392	56.9727	108.245	61.3428	68.0507	63.975	78.7004	38.9529	78.4409	35.749	43.2015	42.0391	44.163	56.6328	61.462	32.4546	33.7087	37.3593	38.1059	72.6405	60.627	36.1793	74.8829	37.0427	44.2192	56.1685	0.0687604	0.390446	5.85292	0.00787114	0.120323
ZNF264	12.842	7.08092	8.37563	14.1535	15.9051	10.7457	10.842	6.9647	12.1191	7.4447	13.8262	12.2155	9.53636	11.2596	11.634	13.8646	11.8021	13.2896	12.4581	17.5719	16.5334	14.0134	10.957	15.4897	10.1734	23.2298	12.4408	15.4198	11.9957	17.6745	15.6649	20.812	13.9387	9.59463	0.0151109	-0.407677	3.92461	0.00788537	0.120409
KLHDC2	18.7932	21.5205	34.1891	25.6768	16.09	19.4957	22.8456	32.2117	22.0464	25.8497	36.0209	19.3854	24.2575	40.2129	28.469	32.9167	28.3539	23.3897	30.5424	37.5905	28.5173	25.9422	28.2486	29.873	31.1274	28.8577	47.9997	41.0577	36.4734	25.3848	42.0104	41.2313	42.2967	36.1797	0.0466042	-0.374424	5.02907	0.00789614	0.120442
SLC3A2	269.995	161.889	94.1916	153.56	183.093	220.9	219.744	509.293	303.751	292.411	230.315	160.925	189.616	183.224	209.138	139.684	193.296	260.609	147.086	102.762	135.596	171.52	138.675	131.662	331.773	128.004	129.305	161.63	108.772	134.279	164.956	121.338	118.399	183.497	0.118142	0.463402	7.58322	0.0079055	0.120453
TMEM208	18.0101	19.1601	12.9067	10.1455	18.1244	14.2764	19.1671	20.0235	16.3737	23.1613	28.562	15.4021	14.9063	13.8186	21.3518	13.2987	27.2024	15.6817	17.2806	11.8999	8.10025	15.1716	19.5172	9.46592	12.451	8.26216	12.6367	17.6492	11.6715	13.9972	16.3769	13.8747	8.33116	15.3914	0.0318591	0.410558	4.16225	0.00792851	0.120672
PHTF2	21.7688	13.8842	18.9482	14.9051	14.4255	35.7677	13.3589	3.48235	17.9208	16.5438	24.7416	26.157	16.2025	35.6798	25.8685	12.8271	15.6882	13.0238	5.62624	11.8999	9.20987	15.6348	10.4434	7.25311	13.5139	16.8835	9.30607	19.8786	13.7789	15.1835	23.26	18.1941	8.33116	11.7934	0.101661	0.538146	4.20496	0.00796877	0.121153
GOLT1B	36.4901	49.7053	27.1865	36.9495	34.7693	86.4257	43.5615	87.7116	37.2598	48.9076	58.7614	65.7245	56.9404	47.305	47.6308	44.4233	36.4139	27.2436	28.3321	32.5858	40.8341	35.4389	46.0537	31.3482	32.1903	38.5567	39.6733	31.0255	55.9259	35.5862	45.0959	36.7809	40.3741	44.3751	0.0617762	0.384254	5.53141	0.00799345	0.121396
CC2D1B	29.4426	27.3518	30.7564	29.5596	35.694	30.7019	32.5259	59.1999	19.4679	22.4375	32.7463	29.6092	23.5168	28.2952	33.6701	31.6905	27.4903	19.8015	19.8928	21.5756	25.6323	19.5725	22.2564	25.9391	31.8866	27.5405	21.6489	22.2938	22.2083	23.8428	27.0575	27.2258	28.8386	20.3886	0.032345	0.34767	4.89506	0.00800958	0.121509
C20orf197	1.72271	1.52726	0.411916	1.50303	1.84943	0.614037	4.64656	0.65294	1.67604	2.37817	0.727695	2.78831	1.48138	0.658029	0.821221	1.88634	1.15143	3.72108	2.21031	2.44672	2.21925	3.12697	3.42407	3.81095	2.27762	1.19741	6.66119	1.30047	3.24208	4.27035	0.949387	3.01054	4.16558	1.99888	0.00165822	-0.87774	2.10479	0.00801971	0.121531
MTERFD1	2.34915	3.19336	0.961138	1.75354	5.54829	8.75003	4.25935	2.17647	2.83638	3.10196	4.73002	4.51441	4.6293	4.97177	3.14802	1.98066	3.88606	1.46185	2.61218	2.78036	0.776736	2.66371	2.05444	1.22934	2.42946	0.718448	1.07755	1.67203	1.62104	3.55862	4.62826	1.70161	1.60215	2.39866	0.00165822	0.794561	2.30199	0.00810691	0.122593
CLCN5	2.34915	2.91567	9.88599	7.64041	4.43863	4.29826	4.06574	3.91764	1.54712	1.44758	2.91078	3.58497	5.09223	2.41277	2.7374	7.26241	2.73464	3.98688	6.22905	7.6738	6.43581	6.94881	5.99212	6.76137	4.55523	4.78966	7.15098	4.83031	5.99785	8.65931	3.44153	6.41376	11.0548	4.79731	0.0123193	-0.608133	2.85516	0.00810737	0.122593
CBWD5	15.5044	14.3007	3.84455	5.63637	16.8298	9.05705	10.4548	16.3235	13.4084	12.201	16.737	3.85052	9.81411	15.6465	23.5417	13.7703	13.8171	9.7014	8.64029	6.45044	2.77406	14.8241	9.24498	5.53203	9.2623	7.06474	7.93465	7.24547	3.56629	8.18483	20.5305	6.80644	6.5688	7.19597	0.0994816	0.581911	3.65963	0.00812064	0.122661
TLR1	64.0534	18.7436	22.93	47.095	60.8462	162.259	39.3022	45.0529	37.7755	81.7883	99.5123	106.752	25.5537	73.4068	67.7508	60.4572	73.1156	50.2346	13.4628	55.3848	29.0721	27.1004	39.8904	26.062	42.971	30.4143	38.7916	50.3467	65.1659	21.1145	64.9143	53.5352	37.33	61.9653	0.189142	0.599551	5.79297	0.00822755	0.123874
MLKL	42.4413	74.1414	46.9585	79.2849	76.9362	86.7328	72.0217	63.7705	33.6498	75.1708	75.6803	59.7495	49.8113	48.2554	95.2617	91.8648	81.7513	44.653	62.6924	62.6137	45.2726	43.4301	68.4813	66.7532	49.3483	34.8447	49.861	34.3695	40.526	44.0083	59.3367	45.4199	76.7428	49.5722	0.0670894	0.380482	5.96661	0.00821254	0.123874
SNHG9	5.01151	8.46934	3.70725	5.0101	2.95909	3.2237	11.4228	2.39411	3.60994	8.37529	7.09503	7.56827	4.35154	5.70292	3.83237	3.20678	4.89356	6.379	10.0469	5.89437	7.6564	10.7707	10.7858	8.60538	7.74389	4.07121	15.9673	8.54594	7.781	4.50759	8.78183	3.14143	3.52472	12.5929	0.0517181	-0.592316	3.13767	0.00822592	0.123874
WDFY3	55.2833	48.7334	64.9455	46.7192	42.5369	32.237	42.7871	20.2411	34.0366	20.8865	20.3755	50.0568	51.8481	24.8589	27.5109	64.7015	23.8921	62.5939	51.4399	50.7138	59.9197	56.0538	48.1081	68.4742	44.3376	62.2655	43.9834	33.0691	59.3301	58.1242	27.6509	61.127	59.7601	44.575	0.0811604	-0.420247	5.59987	0.00827218	0.124412
RNF213	160.525	158.141	263.764	282.82	224.151	219.825	108.807	180.647	85.4783	134.832	156.818	149.772	131.842	143.304	357.779	475.075	256.48	98.3429	122.371	128.564	197.624	76.7844	133.71	214.766	93.3823	157.939	116.571	85.0878	123.685	96.5573	151.19	279.718	210.202	116.135	0.156618	0.528505	7.47471	0.00830903	0.124564
GTF3C1	55.4399	58.3135	53.6864	56.1132	60.8462	48.5089	53.2419	31.9941	42.5458	49.011	30.7451	51.2518	50.2742	43.7224	50.7789	79.415	37.7092	67.5111	61.4867	62.6137	61.5841	59.9914	55.4699	69.0889	68.3285	56.3982	68.9629	46.8169	58.6817	63.4621	51.1482	82.4626	81.5493	43.5756	0.0434185	-0.324227	5.88293	0.00829641	0.124564
ABHD2	150.659	100.521	285.183	173.851	123.172	79.9783	114.034	164.759	120.546	100.71	95.6919	128.395	118.232	93.367	114.697	326.431	185.524	139.674	181.044	260.242	228.804	162.486	114.193	219.56	153.815	237.447	187.591	108.682	183.826	219.33	128.286	334.432	306.811	284.041	0.134809	-0.491503	7.48472	0.00830384	0.124564
MRPL47	46.0433	45.8177	28.1476	38.3273	40.8724	57.873	34.462	57.4587	51.6995	41.0493	65.4925	44.0819	43.3302	53.3003	43.9353	31.3133	43.8981	37.2108	23.3087	27.6924	38.7259	44.704	35.6103	24.5868	32.494	42.0292	31.0529	46.0738	42.6334	28.469	47.7067	29.1891	35.2472	34.7805	0.0406111	0.336472	5.41742	0.00832143	0.124616
C1orf174	29.5993	44.4293	20.3212	28.5576	36.0639	70.0002	45.1104	55.4999	44.9954	44.875	42.2063	36.1153	53.1443	42.9912	41.3348	30.936	34.3989	31.0976	39.9865	21.9092	28.4064	31.3855	50.3338	29.2583	29.609	28.259	36.4406	31.397	32.4208	34.7559	33.5846	23.0372	28.358	32.182	0.0462244	0.355605	5.28378	0.00834292	0.124804
TRANK1	19.8894	20.2709	24.1658	26.1778	31.8102	48.2019	22.652	6.31176	15.858	17.7846	21.6489	30.4059	19.2579	28.0028	27.2372	42.3484	29.3614	19.137	15.4722	23.7999	22.0815	11.813	18.49	18.563	14.2731	24.9062	13.6163	15.4198	18.4799	25.9779	19.6998	25.5241	12.0161	10.1943	0.0791652	0.464832	4.58895	0.00839973	0.125453
ARHGAP18	19.7328	28.8791	14.9663	20.7919	43.2766	43.5966	23.2328	49.1882	36.3573	36.9133	23.2862	37.5758	30.183	22.0074	28.1953	16.2225	18.135	18.6054	24.1124	17.0158	10.2085	35.4389	29.2758	15.4897	26.4203	19.3981	14.5958	24.5231	29.6651	19.8097	23.8533	15.9689	11.8559	19.7889	0.0781856	0.453013	4.76613	0.0084439	0.125453
SMCHD1	272.188	576.193	351.777	307.871	405.58	411.558	293.701	262.482	272.937	295.41	261.606	312.955	354.419	291.653	480.278	658.71	229.278	251.04	404.888	231.326	209.497	211.939	400.102	317.047	247.805	295.163	305.533	213.648	307.836	237.004	242.094	305.897	262.752	145.918	0.0845394	0.387052	8.31317	0.00842319	0.125453
UBQLN2	87.2317	80.1116	44.6243	80.1617	96.3552	87.5003	91.3824	89.2352	113.326	80.8578	74.5887	105.956	75.0872	95.1217	82.9434	63.664	60.162	89.0402	56.8652	52.7157	79.56	65.0872	62.4892	44.5021	82.6015	69.6895	56.5222	78.5855	72.4606	61.2083	78.4431	57.8547	49.0257	57.168	0.0479421	0.324269	6.26611	0.00843865	0.125453
UBXN2B	51.6812	56.6474	46.8212	36.5738	43.8315	43.2896	35.8173	53.1058	50.0235	45.1852	39.2955	37.1775	44.6264	50.0833	37.3656	65.456	35.4064	62.1953	64.9027	65.0605	44.3849	52.4635	39.3768	53.2304	39.4787	59.0325	63.4772	48.4889	60.1406	58.5986	57.0819	50.5247	68.8923	58.1674	0.0346946	-0.304266	5.73403	0.0084491	0.125453
ABHD4	22.7084	19.0213	26.2253	21.1677	14.0557	20.1097	21.8776	20.2411	21.5307	28.2278	15.8274	20.0493	23.8872	21.6418	17.1088	28.3894	25.9071	25.9147	24.7153	33.8092	22.7473	19.6883	22.5988	26.9225	26.5722	30.8933	32.7182	24.7089	26.5851	26.3338	18.9877	28.142	35.087	33.5812	0.0234125	-0.333353	4.73968	0.00843625	0.125453
EMC1	21.7688	11.9404	20.3212	13.903	24.0426	9.8246	10.842	8.70587	13.2794	14.1656	7.45887	14.2071	14.536	8.7006	14.782	17.543	18.9985	22.0607	20.6965	27.1363	16.6443	19.9199	17.9764	16.719	12.2991	22.7509	18.3183	13.0047	12.3199	26.0966	13.2914	25.7859	22.2698	17.5901	0.0419115	-0.417633	4.2481	0.00841142	0.125453
NDUFS6	52.4643	23.0477	42.5647	41.9596	55.4829	37.6098	41.6255	50.0588	39.4515	41.1527	47.4821	38.1069	41.1082	37.9463	61.5916	43.8574	64.192	43.7227	36.5705	28.2485	32.29	37.5236	34.9255	25.6932	34.1642	30.5341	27.9182	43.6586	27.7198	44.2455	40.2303	37.6972	37.0096	38.1786	0.0373163	0.326951	5.4099	0.00847697	0.125733
PSMA7	185.269	220.203	120.966	176.982	172.552	254.518	181.603	339.529	203.446	198.112	225.04	282.15	240.446	157.488	171.225	134.402	193.727	158.943	160.549	133.902	154.238	195.377	192.946	144.079	186.613	146.444	145.567	153.827	218.192	173.068	160.921	83.1171	59.9203	181.898	0.0758304	0.372322	7.51755	0.00851296	0.125743
TRIM28	108.844	81.0835	95.0154	96.0687	92.4714	55.7239	76.8619	62.6823	70.9096	56.7659	70.4045	72.3633	89.901	56.5905	72.9518	77.2457	80.168	114.423	81.7814	92.4192	112.072	96.9359	83.8896	98.5931	75.465	120.101	92.473	89.3608	68.0837	113.757	85.4448	110.866	89.0794	86.7514	0.0434326	-0.306141	6.47846	0.00851368	0.125743
XPOT	44.3206	48.8723	40.2305	29.8101	33.2897	30.5484	43.3679	28.0764	63.174	31.8468	27.4705	34.9203	46.9411	32.8283	26.416	34.6144	26.7707	49.703	71.9355	41.0381	35.8408	65.4347	50.8474	57.9019	35.379	50.6506	45.9426	40.6861	42.1471	54.4469	34.2966	33.3777	48.8655	31.9821	0.0491761	-0.353786	5.46078	0.0084936	0.125743
VPS13D	19.263	21.1039	27.1865	21.5434	24.4125	17.0395	18.3926	13.0588	13.1505	9.20248	10.5516	15.9332	20.1837	9.65109	13.5502	27.3519	16.5518	19.2699	28.1312	23.355	24.8556	24.4367	19.8596	34.7903	15.7915	25.2654	22.0407	14.4909	19.4525	25.8593	13.1727	29.9745	28.6784	21.7878	0.0464326	-0.402966	4.49434	0.00850216	0.125743
TBC1D23	29.1294	40.2641	69.8885	24.6748	41.6121	68.1581	36.0109	44.8352	31.587	42.6003	40.9328	39.0363	34.9975	48.1823	54.4744	48.5733	30.3689	19.4028	23.9115	44.0409	26.631	31.9645	30.8166	32.8234	37.3529	34.3658	38.6937	26.5667	34.3661	30.6041	44.1465	33.9013	36.0483	26.785	0.0554949	0.377285	5.3259	0.00852291	0.125747
IL3RA	10.1796	18.1883	5.35491	11.398	30.3306	41.294	8.32509	42.0058	11.3455	3.61895	5.82156	7.30272	6.29585	4.16752	7.93847	3.67837	5.75713	5.18294	11.2525	1.22336	14.0922	13.2027	11.6418	10.9411	15.4878	8.86086	1.46938	4.45875	3.40419	2.49104	3.67887	1.9634	2.24301	0.99944	0.428488	0.95812	3.57868	0.00857816	0.126295
CNNM3	23.9613	19.299	20.5958	23.5475	15.9051	11.8202	24.0072	14.3647	27.8481	16.337	18.1924	22.3065	24.6279	26.9792	13.1395	26.5974	21.4453	27.3765	16.6778	26.8027	30.9585	17.1404	19.0036	25.5703	31.1274	37.2396	29.8774	26.1952	26.423	27.52	29.1937	27.8802	26.7558	21.1881	0.0317292	-0.360189	4.68948	0.0085731	0.126295
PSMC2	37.1165	34.0162	47.5077	41.5839	49.9346	74.2985	19.3607	80.7469	35.3259	79.5136	65.1287	41.1608	40.3675	76.9894	89.9238	48.7619	84.9177	28.4397	24.1124	47.3774	25.2994	40.7664	29.447	34.9133	33.7087	26.8221	38.8896	43.8444	35.5008	29.4179	63.3716	42.9329	63.9256	59.1669	0.117954	0.488539	5.65189	0.00860411	0.126513
TNFRSF10D	20.5159	7.49745	9.74869	13.2768	11.0966	16.4255	10.842	28.7294	10.572	6.72091	6.54925	11.5516	9.44377	5.55669	9.44405	15.8453	13.5293	17.1436	12.86	20.3522	24.4117	12.1604	15.9219	11.9246	22.4725	13.89	17.8285	11.1469	13.1304	19.9283	9.49387	15.3145	22.1096	31.3824	0.0793341	-0.503706	4.07697	0.00861109	0.126513
ITGAM	139.383	79.2786	224.769	158.319	132.604	43.4431	82.0893	128.847	102.626	123.561	108.063	109.01	121.38	59.8806	125.647	147.701	146.519	112.696	150.904	213.309	174.988	128.437	111.282	176.779	87.4604	181.288	177.501	123.359	131.142	214.704	130.778	180.371	176.717	260.654	0.106755	-0.44004	7.17275	0.00862661	0.126608
RNASE1	1.5661	0	0.549222	3.75758	1.2946	9.51758	2.9041	19.3706	2.4496	4.96314	6.00348	1.99165	0.740688	0.438686	2.7374	0.848854	1.58321	0.930271	0.401874	1.11214	0.776736	0.347441	7.01934	1.22934	1.51841	0.957931	0.783669	0.743125	0.324208	2.8469	0.71204	0.785358	1.60215	1.39922	0.494135	1.28288	2.1777	0.00865577	0.126903
C20orf194	12.059	10.1354	17.4378	16.0323	6.84289	7.82897	13.7461	10.447	8.767	5.89372	6.18541	11.9499	11.7584	9.28552	6.70664	13.7703	4.02999	13.2896	12.0562	16.571	15.8676	11.1181	15.5795	15.8585	16.0952	17.4822	16.4571	10.9611	9.40204	13.2855	8.06979	15.8381	16.8225	7.99552	0.0281512	-0.438007	3.81776	0.00867524	0.127055
SNORA56	7.04744	4.16525	4.943	3.50707	13.5008	3.83773	4.64656	10.8823	6.57525	1.96457	1.63731	5.97495	6.11067	0.950486	2.60053	1.79202	0.431785	5.84742	4.01874	1.66822	2.55213	4.86417	2.56805	3.31922	2.12577	2.63431	1.86121	2.41516	3.07998	3.20276	0.593367	1.04714	1.92258	0.799552	0.125928	0.811994	2.51899	0.00870706	0.127207
TRAF4	14.0949	15.6891	17.5751	13.0263	7.7676	23.1799	12.778	45.0529	10.443	8.47869	7.82272	8.76326	8.33274	5.84914	11.0865	5.56471	5.6132	9.30271	7.63561	2.22429	14.4251	5.32742	9.41618	10.2035	18.2209	10.8965	6.07344	7.98859	5.83575	7.11724	2.72949	5.89019	7.85052	3.99776	0.180131	0.688003	3.65438	0.00871295	0.127207
DGKD	30.2257	34.0162	89.6605	41.3334	30.5156	15.8115	44.7232	16.3235	25.1407	24.8157	21.467	30.2731	37.8677	19.4484	7.25412	16.2225	24.036	38.0082	39.1827	74.6249	55.925	36.9445	37.6647	78.4319	42.971	71.6054	73.8608	35.2984	43.606	58.48	27.6509	9.94787	13.1376	42.3763	0.204144	-0.626843	5.33577	0.00870096	0.127207
SLC46A2	49.0189	43.874	31.7176	44.3394	19.6039	44.8247	46.272	11.9706	32.3606	37.7405	10.5516	49.6585	52.3111	38.0194	12.4552	50.271	61.4574	57.1452	56.4633	65.1717	47.6028	44.704	61.1196	33.8069	53.2962	35.204	44.4732	29.725	68.8943	70.3421	43.3158	33.5086	57.0364	91.3488	0.125564	-0.500115	5.57163	0.00875246	0.127651
CKS1B	18.7932	13.8842	16.8886	8.26667	13.5008	44.6712	17.231	15.2353	27.3324	13.752	14.5539	16.1988	16.0174	35.3873	18.0669	8.01695	16.8396	16.3462	10.4487	11.1214	15.5347	14.3609	13.1827	8.60538	10.477	18.4402	9.11016	18.2066	13.6167	11.8621	16.1396	15.1836	7.85052	9.19485	0.0849901	0.501267	4.1624	0.00879443	0.128129
OSTM1	94.1225	82.1943	62.1994	64.1293	83.0393	119.123	74.5386	64.2058	76.7113	81.6849	102.423	84.3132	67.1248	84.7395	80.7534	77.6229	75.7063	79.8704	56.0614	57.2754	67.5761	92.9983	62.6604	52.247	66.3545	56.5179	47.1181	72.4547	72.2985	49.2276	79.7485	54.1897	53.1913	77.7565	0.0437491	0.311577	6.23909	0.00888181	0.129267
CSTF2	9.70981	6.38672	4.943	10.6465	10.5417	7.82897	10.2612	8.27058	9.92734	15.303	12.1889	9.29437	10.4622	11.6983	12.7289	8.20558	14.9685	6.91058	3.21499	11.4551	4.88234	7.87532	6.84813	7.49897	7.44021	5.38836	7.73873	7.98859	4.37681	7.82897	8.9005	9.68608	6.5688	9.59463	0.0100791	0.461702	3.44545	0.00892625	0.129779
HIF1AN	20.6725	17.6329	17.7124	25.5515	19.2341	21.3378	17.0374	8.48822	11.3455	10.6501	16.9189	20.0493	14.2582	14.3304	17.2457	24.3338	27.4903	21.2633	25.7199	29.8055	24.6336	14.8241	29.6182	19.3006	13.362	27.6603	17.1428	18.3923	27.0714	33.9255	17.445	28.7965	20.6677	27.9843	0.0431323	-0.395514	4.51819	0.00896189	0.130162
FGL2	1746.36	2142.33	1155.15	1055.5	1598.28	1850.25	1370.93	1324.16	2067.08	1706.59	1735.92	1361.36	1451.75	1617.22	2119.57	1796.65	1337.96	1603.39	2026.65	1027.96	814.463	1313.67	1699.36	1066.33	832.696	1564.9	1044.04	1370.69	1261.82	1186.68	1670.8	1061.41	1083.37	729.391	0.0732856	0.352244	10.5039	0.00899313	0.130344
SLC35B4	4.38507	3.60988	5.76683	6.01212	3.32897	4.14475	5.42099	1.52353	3.73887	3.20536	4.00232	2.78831	3.9812	3.80194	1.91618	4.52722	4.89356	5.18294	5.82717	6.78408	6.65774	5.79068	6.50573	7.13017	3.03682	11.1359	4.01631	5.01609	7.13258	7.23586	2.96683	5.89019	4.3258	6.99608	0.00165822	-0.59723	2.81596	0.0089927	0.130344
ACTR10	35.0806	61.7845	27.5984	27.5556	39.5778	63.5529	41.8191	27.4235	50.926	56.5591	64.9468	70.9028	60.4586	48.4748	46.9465	38.8586	46.4888	32.2937	27.5284	36.1447	24.1898	50.0315	36.8087	24.5868	38.1121	35.3237	36.9304	41.615	46.8481	40.5683	46.6386	29.8436	33.1644	37.9787	0.0576648	0.371832	5.47554	0.0090055	0.130388
UBL7	8.92676	5.13714	6.04144	7.3899	7.95254	9.9781	6.77624	6.09411	8.2513	11.0637	8.91426	5.7094	6.48102	8.40815	11.634	7.92263	10.7946	6.5119	4.21968	7.56258	4.66042	6.60137	4.62249	5.04029	3.3405	6.82526	4.31018	5.945	3.8905	5.45655	9.01918	6.67554	4.16558	6.79619	0.00165822	0.501447	3.16469	0.00901988	0.130462
PFDN2	57.6324	62.0622	45.5854	46.9697	66.7644	63.3993	72.6025	107.953	79.8055	89.4398	94.4184	39.7002	44.9042	89.3457	101.284	35.2746	74.6988	60.8663	55.0567	38.2578	50.9317	58.7175	44.8553	40.8141	61.7993	44.7833	48.7834	76.5419	33.2314	33.5697	80.5792	43.1947	51.4289	50.1719	0.0835752	0.41081	5.97674	0.00907803	0.131167
RNF19B	338.434	280.877	1168.33	168.214	199.368	143.838	153.724	460.105	231.294	198.112	189.201	139.681	154.156	105.504	169.308	310.68	209.272	297.554	259.008	118.666	179.537	175.458	207.67	194.973	191.168	168.117	210.317	151.598	140.544	135.109	113.214	211.261	138.265	141.121	0.209846	0.600281	7.84331	0.00913111	0.13139
IQCE	17.5403	18.7436	21.0077	23.9232	15.5352	13.3553	19.3607	14.3647	13.7951	11.0637	20.1935	13.0121	17.4987	15.2809	22.5836	21.5986	14.9685	16.612	28.1312	20.3522	27.7406	14.2451	20.202	24.218	17.9172	26.3431	23.3142	20.4359	19.6146	20.0469	17.9197	28.142	23.872	21.9877	0.0195118	-0.347252	4.44819	0.00912541	0.13139
NF2	23.4915	19.5767	40.7797	26.5535	18.3093	8.2895	20.5223	15.2353	23.0778	19.5423	21.467	12.2155	19.9986	24.7858	21.4886	22.8247	17.7032	21.7949	23.9115	36.3671	34.2874	25.5948	19.6884	26.1849	18.8283	41.4305	34.2855	27.6814	17.6694	22.4193	29.3123	37.1736	28.1978	23.9866	0.057771	-0.409525	4.73552	0.00910743	0.13139
SLC7A1	6.26439	4.30409	10.2979	7.1394	5.1784	1.84211	4.84017	16.1059	7.09096	3.82575	2.72886	4.77996	5.55516	5.33734	4.65359	8.01695	4.17392	7.57506	4.82249	14.5691	11.762	9.03346	5.64971	5.53203	9.11046	16.5243	10.7755	6.50234	6.32206	10.32	6.76438	13.7438	5.76773	8.19541	0.0673458	-0.587137	3.26733	0.00912783	0.13139
RNASET2	659.014	510.382	718.108	450.283	572.213	708.138	534.161	868.193	649.274	676.641	1206.7	417.052	463.578	912.905	954.533	471.019	715.324	454.371	419.757	435.627	530.733	438.354	453.518	438.997	481.488	466.872	541.907	775.637	331.179	470.924	882.811	565.981	451.805	548.893	0.0890363	0.389324	9.23854	0.00916576	0.131618
STK32B	0.15661	1.6661	1.37305	1.12727	0.739771	0.153509	2.12967	0.217647	1.67604	1.65438	1.27347	0.531107	1.66655	0.658029	0	0.660219	1.87107	1.99344	2.00937	3.00279	1.55347	2.08464	1.71203	3.68802	1.36657	2.63431	3.72243	1.85781	0.972625	1.30483	1.89877	0.523572	0.480644	5.59687	0.00165822	-0.980823	1.8603	0.0091633	0.131618
FANCB	3.60203	8.88587	4.11916	3.00606	1.47954	2.30264	4.64656	1.95882	6.96203	1.96457	1.81924	8.89604	9.53636	1.97409	1.3687	1.50907	2.15892	6.11321	7.23373	4.11493	5.65908	11.4655	12.4978	5.53203	3.03682	7.66345	4.11426	2.60094	15.8862	9.48966	2.96683	3.665	3.52472	5.79675	0.139599	-0.741953	2.86574	0.00921428	0.132179
GRIN2D	4.54168	2.77683	1.92228	5.13536	4.80851	5.06581	4.45296	2.61176	2.4496	3.61895	8.00464	4.24885	2.77758	2.77834	6.4329	3.3011	3.31035	3.45529	1.80843	2.22429	2.55213	1.7372	2.22564	2.58161	1.51841	4.31069	1.86121	2.41516	2.26946	1.18621	2.84816	2.35607	2.40322	1.79899	0.00165822	0.7434	2.38663	0.00923951	0.132405
CCDC106	2.03593	2.22147	3.98186	5.0101	2.77414	0.767547	3.29131	3.69999	5.67277	3.92915	2.54693	2.65553	4.25895	2.63212	2.18992	3.01815	4.6057	3.85398	4.21968	2.3355	6.87966	3.59022	3.93768	5.04029	6.52917	7.78319	4.79997	5.57344	5.34944	4.98207	5.45898	3.53411	6.08816	6.39642	0.00165822	-0.636096	2.64186	0.00928243	0.132883
HSPA1B	2.81898	3.3322	3.02072	2.50505	3.14403	11.5132	7.35706	31.9941	5.02813	6.41072	7.45887	2.52276	2.87017	32.0972	6.84351	2.45224	5.46927	4.78425	4.42061	4.22615	2.55213	1.7372	2.22564	3.93389	11.3881	2.51457	0.881628	4.27297	2.75577	3.91448	4.98428	5.89019	4.00537	4.59743	0.364516	0.959209	3.02942	0.00936642	0.13323
LILRB1	56.2229	33.8774	25.5388	54.6101	35.1391	68.1581	33.494	40.2647	36.3573	40.0153	39.8413	49.1274	39.2565	54.2508	68.4351	63.2867	68.222	39.603	32.5518	17.3495	35.0641	19.3409	31.8438	33.8069	24.5983	37.7185	21.0611	43.287	55.4396	37.0097	40.1116	50.9174	31.8827	50.3718	0.0771402	0.411191	5.45675	0.00937293	0.13323
C1GALT1C1	33.2013	32.3501	16.3394	24.5495	38.2832	44.6712	16.6502	16.9764	30.6845	32.0536	40.569	44.7457	31.5718	30.6349	41.4717	25.5599	46.3449	25.6489	20.8975	25.6905	18.5307	31.2697	30.4742	16.2273	16.5507	30.8933	18.2203	20.4359	29.1787	23.9614	34.6526	20.812	16.6623	30.383	0.0594148	0.399152	4.9303	0.00933231	0.13323
FCER1G	2347.27	2099.56	2525.6	1714.83	2063.04	2789.26	2247.39	3184.17	2164.93	2554.46	2897.86	1708.57	1857.46	3260.46	2829.24	1756.84	3474.14	1855.49	1509.44	1829.7	1548.37	2000.45	1912.86	1660.84	1556.83	1922.69	1565.67	2238.29	1922.72	1411.94	2772.45	1726.48	1620.09	3274.37	0.0723714	0.347764	11.1047	0.00933826	0.13323
PHF12	55.1267	41.236	78.8133	70.3919	33.8445	25.9431	50.9186	40.2647	42.4168	44.0478	33.8378	38.9036	53.9776	43.5761	27.9215	46.3097	42.171	60.9992	56.4633	60.0558	88.9918	53.8533	54.6139	76.4649	57.3959	79.628	71.02	57.4064	89.6436	48.6345	39.9929	31.0216	26.9161	59.1669	0.0776481	-0.402479	5.7819	0.00937343	0.13323
C7orf29	1.09627	0.971892	1.51036	1.37778	0.184943	0.460528	0.968034	0.435294	1.9339	0.620392	0.545771	1.19499	2.22206	1.46229	2.18992	2.64088	2.73464	1.99344	2.41124	4.67101	3.32887	2.66371	1.54083	1.59814	0.455523	2.87379	2.44897	1.30047	2.43156	3.32138	2.72949	2.87965	2.24301	4.39754	0.00165822	-0.891903	1.99492	0.00932209	0.13323
LYPD3	13.4684	4.72062	8.23833	3.50707	2.40426	2.14913	9.87394	5.22352	5.02813	2.17137	3.0927	1.32777	1.85172	0.438686	1.91618	3.67837	2.73464	13.0238	6.42999	1.66822	9.09891	12.5079	7.53295	19.5465	4.70707	5.98707	6.75915	21.5506	1.94525	2.37241	2.25479	2.61786	19.386	0.99944	0.367742	-0.943204	3.0487	0.00937143	0.13323
CD93	139.696	93.1628	191.129	88.3031	110.966	53.5747	96.997	250.511	125.188	82.4087	101.15	79.1349	105.363	63.975	64.329	123.461	89.3795	148.976	134.025	153.587	163.669	123.226	111.111	165.715	96.4191	172.907	146.448	147.139	116.229	117.79	121.996	135.212	197.865	219.277	0.101931	-0.427033	7.03449	0.00940275	0.133511
NAA16	5.79456	13.3288	8.92486	11.7737	5.54829	6.90792	14.9077	7.39999	15.9869	9.40928	6.00348	8.49771	13.3324	10.5285	8.89657	10.7521	5.75713	12.8909	14.4675	13.9018	11.5401	14.0134	15.4083	15.7356	15.3359	16.8835	12.3428	5.945	12.1578	13.6414	9.13785	12.5657	13.9387	8.79507	0.0159307	-0.425175	3.74452	0.00942716	0.133722
BRI3BP	11.9023	7.35861	7.96372	12.901	10.1719	4.75879	9.09952	1.95882	10.1852	4.96314	6.18541	15.1365	9.16601	5.19112	3.6955	5.37607	4.6057	11.5619	6.83186	10.6766	18.7526	12.0446	13.0115	10.8182	6.52917	20.356	8.81628	9.84641	14.2652	13.9972	8.66316	8.63894	3.68494	9.59463	0.0630488	-0.531758	3.52221	0.00947095	0.134207
TMEM106A	26.3104	20.6874	34.4637	35.196	50.6743	37.9168	26.1369	34.3882	18.4365	38.6711	30.927	26.8209	23.4243	20.9838	77.6054	53.0062	61.3134	22.4594	24.9162	31.6961	20.8609	26.5213	24.8245	23.2345	30.2164	19.1586	16.0652	21.3648	18.642	28.9435	28.0069	33.2468	37.33	36.5795	0.0953683	0.461267	5.07349	0.00951416	0.134683
CMAHP	5.95117	9.9966	6.31605	7.01414	6.65794	9.8246	11.2292	8.70587	8.63808	4.13595	4.00232	9.6927	7.40688	4.6062	5.20107	3.39541	3.45428	5.84742	4.42061	4.33736	3.99464	6.0223	4.9649	5.04029	4.55523	5.14888	2.74284	3.52984	12.1578	5.21931	1.66143	3.40322	1.1215	1.99888	0.0235592	0.583815	2.95008	0.00953597	0.134855
PAG1	126.697	64.7002	153.096	82.2909	98.7595	170.549	54.2099	128.847	73.617	79.4102	90.2342	75.9483	52.5888	126.561	104.021	81.3013	71.2445	87.977	44.2061	64.7268	86.9945	64.9714	58.894	55.935	77.2871	108.725	61.518	49.232	99.8562	43.1779	65.389	114.531	36.6892	74.7581	0.104785	0.439838	6.42904	0.00954963	0.134911
TRAPPC10	40.4053	24.2973	36.386	49.8505	30.1457	31.1624	26.9113	20.2411	14.8265	22.6443	20.1935	28.4142	29.2572	23.4697	24.9104	40.1791	30.2249	40.9319	38.7808	45.5979	45.2726	34.165	31.5014	39.4618	21.2577	45.6215	28.408	23.2227	38.7429	43.5338	30.3804	47.6451	41.6558	34.9804	0.0508691	-0.366112	5.15013	0.00958348	0.135253
SGPL1	23.1783	19.7155	51.2149	24.8	14.4255	17.0395	13.5525	19.5882	32.6184	14.3724	27.8343	12.7466	18.2394	39.1893	21.7624	21.7872	21.5892	21.5291	32.7527	33.0307	28.6283	20.6148	20.7156	32.9463	16.8544	45.1425	35.2651	40.1288	30.6377	30.011	37.5008	39.9224	33.1644	33.3813	0.0826851	-0.445238	4.89042	0.00959791	0.13532
ARID5B	22.3952	14.7172	48.6061	25.5515	38.838	66.316	20.7159	72.694	27.3324	33.5012	18.1924	26.2898	14.2582	34.6562	29.1534	48.8562	34.3989	14.7514	25.3181	9.11959	20.8609	6.13812	13.3539	14.2603	21.8651	32.6894	10.3836	10.218	73.7574	11.1503	16.3769	30.2363	26.2752	28.584	0.219227	0.65091	4.90721	0.00961817	0.135469
CLECL1	1.72271	7.77513	2.33419	5.88687	1.66449	48.816	14.3269	1.74117	4.25458	6.41072	1.81924	7.43549	0.833274	10.8209	8.89657	5.09312	7.34034	0.664479	3.8178	2.22429	3.77272	0.347441	10.2722	7.49897	2.5813	2.27509	2.8408	0.743125	5.99785	0.830345	4.98428	5.75929	4.16558	4.59743	0.497901	1.07124	2.99487	0.00965574	0.135734
PCNA	25.9972	24.9915	9.74869	17.0344	27.0017	61.8642	25.1689	18.0647	21.4018	31.8468	39.2955	33.7253	25.0908	35.826	40.7873	18.7691	28.066	23.3897	12.4581	22.2429	11.5401	22.4678	15.4083	10.5723	27.1795	18.7994	14.0081	33.6264	20.7493	16.251	38.2128	21.3356	15.2204	14.7917	0.106965	0.500175	4.72901	0.00965643	0.135734
CANX	598.093	830.551	428.393	344.946	423.334	305.637	515.768	533.452	950.188	544.497	264.881	469.897	554.868	517.284	424.572	484.035	461.578	812.259	1212.86	433.625	460.272	765.759	775.722	621.677	605.542	603.736	821.579	579.08	630.261	656.566	532.725	509.305	599.203	580.875	0.0874928	-0.383308	9.20959	0.00966737	0.135751
ACSL5	76.5822	53.3152	91.0335	65.5071	60.8462	95.0223	46.0784	51.5823	58.4037	72.1723	65.8564	74.3549	59.1624	40.944	65.5608	59.6084	81.7513	56.082	53.8511	72.4006	44.3849	58.4858	58.894	34.5445	48.4373	48.4953	41.2406	51.6472	53.4944	61.92	45.4519	63.0904	41.9762	52.5706	0.0447615	0.319552	5.9463	0.00980701	0.137436
MPP5	2.66237	2.91567	3.84455	3.63232	2.5892	1.53509	2.51689	2.39411	2.70746	3.20536	3.27463	2.2572	2.68499	3.21703	3.55863	6.13061	2.87857	2.65792	7.23373	4.44858	5.10427	3.35859	5.64971	6.5155	2.5813	5.74759	7.73873	3.52984	6.80837	3.67724	2.61081	6.28287	5.60751	2.99832	0.00165822	-0.657742	2.5925	0.00980197	0.137436
GSK3B	43.0677	42.2079	63.2978	49.2243	33.8445	23.7939	34.6556	37.2176	51.0549	40.0153	50.3929	36.3808	38.3306	45.7696	50.9157	56.8732	46.9206	36.1477	64.9027	63.3922	47.3809	43.0826	44.5129	56.3038	33.405	73.7607	55.2487	60.9363	51.7112	51.9559	67.5252	73.1692	60.0805	51.771	0.0506991	-0.341926	5.70417	0.00982463	0.137545
MIIP	33.6711	100.799	35.0129	84.9212	81.5598	77.8292	75.313	62.247	53.7624	60.2814	86.5957	86.4376	38.4232	30.7811	72.5412	66.9651	47.7842	31.895	70.9308	39.926	57.2566	53.8533	72.7614	63.1881	37.3529	37.1198	38.3018	45.888	75.3784	25.1476	24.4467	49.0849	41.816	38.3785	0.0980422	0.436535	5.86572	0.00983476	0.137549
MPP7	42.2846	73.1696	103.666	65.0061	43.2766	39.6054	67.956	74.4352	58.1459	49.528	54.941	45.808	54.2554	53.5928	45.8515	97.2409	52.102	57.1452	78.5664	84.9678	85.441	72.036	55.9835	112.853	61.6475	77.5924	85.6159	78.2139	81.3763	49.2276	71.56	57.9856	134.26	78.3561	0.0763816	-0.386316	6.1689	0.009873	0.137946
MSMO1	9.23998	7.49745	1.92228	7.76566	12.0213	23.1799	7.74427	11.1	8.2513	13.8554	13.8262	11.5516	11.851	11.6983	17.1088	4.81017	8.20391	3.98688	9.44404	5.78315	3.99464	4.86417	8.90257	5.04029	11.9954	6.22655	6.75915	4.08719	17.9936	4.86345	8.78183	7.5918	4.64623	4.9972	0.0920444	0.578798	3.45746	0.00990269	0.138213
ANKH	4.38507	1.24957	10.4352	5.26061	1.47954	2.45615	2.71049	5.65882	10.443	1.75778	2.18308	1.85887	3.88861	5.48357	1.77931	3.20678	2.73464	4.38556	2.21031	9.34201	6.65774	7.99113	3.93768	4.30269	7.13653	14.4887	4.01631	8.36016	5.02523	8.42207	5.10296	9.68608	4.64623	3.59798	0.0991775	-0.703191	2.86308	0.00991195	0.138213
HOXA1	1.40949	0.694208	1.64767	2.25455	3.14403	5.83335	2.71049	3.91764	2.4496	2.27477	2.72886	1.99165	0.555516	8.11569	2.60053	1.88634	5.6132	1.06317	0	2.11307	2.21925	1.62139	0.342407	0.983472	2.88498	2.0356	0.783669	2.22938	0.972625	0.830345	2.49214	3.14143	0.961288	1.19933	0.0291825	0.880119	2.09741	0.0100413	0.139599
ESF1	12.2156	12.7734	7.68911	12.4	17.1997	17.3466	19.3607	8.27058	16.7604	18.6118	17.2828	10.4894	8.70308	25.7362	19.1618	7.92263	9.06748	13.2896	7.0328	13.2345	9.09891	12.2762	9.58739	7.99071	10.6289	11.0162	8.62036	12.2616	4.70102	11.0317	17.6823	9.03162	6.72902	6.39642	0.0539249	0.480283	3.83622	0.0100369	0.139599
USP9X	64.9931	48.3169	123.3	48.8485	53.8184	48.0484	43.5615	67.4705	65.7525	33.3978	30.0174	41.6919	62.2178	39.4086	45.3041	68.1912	34.9746	71.6309	79.1692	80.7417	73.3461	63.0026	58.0379	88.3895	75.3132	96.8708	69.6486	55.177	57.8712	65.4786	48.6561	69.1115	82.1901	54.7693	0.0743755	-0.384497	6.01823	0.010041	0.139599
UBE2L3	430.99	583.968	275.709	373.879	476.413	458.072	526.61	447.264	502.813	456.712	406.963	404.172	439.969	467.639	562.537	344.729	421.134	404.003	451.305	293.606	295.604	414.96	524.225	319.137	342.553	325.098	373.908	371.191	389.698	347.203	395.657	312.049	301.524	341.209	0.0450434	0.277765	8.68518	0.0101254	0.140577
ACTR1B	38.8392	25.8245	58.0802	43.9637	27.9264	21.1843	34.2684	40.6999	36.2284	21.3001	39.2955	34.3892	35.2753	36.2647	32.8489	44.2347	46.9206	33.224	47.0193	48.4895	68.5747	37.0603	40.0616	44.8709	26.4203	58.1943	53.1916	41.8008	45.8755	45.1945	40.8236	56.5458	39.7332	55.5689	0.0516063	-0.35287	5.45154	0.0101318	0.140577
VCP	243.841	225.201	273.924	210.925	196.039	94.5617	198.06	260.306	243.929	165.231	178.467	173.008	215.262	137.016	182.585	206.932	158.321	262.735	264.031	257.461	265.2	217.382	210.409	218.208	283.032	323.9	294.464	235.199	199.55	209.84	197.116	224.743	248.493	219.277	0.0553251	-0.311363	7.81524	0.0102518	0.142101
SEC22C	6.26439	7.08092	8.51294	6.51313	3.69886	6.14037	8.5187	5.00588	4.77028	4.34274	6.36733	5.44384	4.90706	4.45997	6.29603	6.69651	5.46927	8.23954	8.23842	9.2308	8.43314	8.68602	7.01934	7.25311	7.28837	7.78319	10.3836	7.43125	7.6189	9.01518	4.15357	8.37715	13.9387	7.59575	0.00165822	-0.489374	3.20274	0.0102669	0.14217
LIMS1	26.1538	30.5452	24.1658	20.6667	24.7823	40.0659	25.5561	52.4529	27.9771	32.9842	33.292	26.9537	22.0355	29.5382	34.765	23.0134	24.3239	20.8646	23.7106	22.4653	20.528	25.9422	27.7349	23.7263	16.5507	19.2784	18.8081	23.78	29.0166	20.9959	28.1256	22.9063	18.9053	28.584	0.0312035	0.335408	4.83451	0.010303	0.142528
GPR65	29.9125	38.598	23.3419	32.3152	52.1539	90.724	27.1049	103.6	28.8795	50.4585	61.1264	31.9992	26.6648	68.0694	71.0357	46.6869	56.4199	21.1304	34.1593	38.8138	31.8462	34.6282	31.159	27.4143	39.4787	24.9062	23.804	40.1288	35.6629	22.6566	54.9458	37.0427	43.258	51.1713	0.121568	0.487714	5.48219	0.0103904	0.143595
PSTPIP2	44.7904	131.483	71.1242	93.1879	79.5254	70.1538	86.155	93.8058	85.994	67.8295	74.4068	173.008	89.2529	69.2392	103.885	93.7512	95.8562	54.3544	99.8657	34.4765	76.7859	61.6128	87.9985	63.8027	42.3637	89.2073	46.5304	52.3903	143.948	39.6193	60.1674	57.2003	63.2848	56.1685	0.0984127	0.423848	6.33486	0.0104128	0.143668
PSMB3	288.475	279.349	144.72	224.453	265.763	318.685	189.928	346.494	257.724	253.947	331.101	380.007	275.536	229.871	274.699	226.927	334.201	243.332	206.362	163.93	171.659	266.719	271.7	147.767	166.873	224.515	158.987	208.818	350.793	190.386	242.924	182.858	178.8	267.65	0.0642932	0.332189	7.95146	0.0104162	0.143668
NDUFAF4	11.9023	14.023	6.59066	10.396	10.3568	26.5571	15.6821	15.2353	22.1754	18.8186	20.0116	22.8376	18.332	25.2976	17.5194	5.94197	14.5368	11.1633	7.0328	13.7906	10.0976	19.1092	10.957	5.53203	15.7915	10.657	11.755	13.7478	10.0505	7.11724	21.8359	7.33001	8.49138	7.99552	0.0794367	0.501348	3.99764	0.0104299	0.143715
FSCN1	6.26439	1.80494	13.7305	13.5273	5.73323	1.6886	6.96984	1.30588	9.15378	6.51412	3.8204	4.91274	5.74033	2.48589	0.821221	1.60339	6.90856	8.90402	3.21499	8.00744	18.6417	7.99113	9.24498	7.49897	9.86967	11.1359	8.22853	14.4909	14.7515	11.7435	4.98428	2.22518	1.92258	10.9938	0.186003	-0.723416	3.22678	0.010443	0.143754
DTNBP1	86.1354	118.293	45.9973	64.0041	114.11	102.237	124.296	34.3882	102.754	91.1976	68.9491	75.2844	82.7719	61.3429	104.021	86.2058	87.5084	93.9574	100.067	49.6016	59.2539	70.183	88.3409	72.1623	59.218	55.56	56.1303	52.7619	65.9764	68.4442	51.8603	62.1742	49.5063	58.967	0.0710046	0.368509	6.28721	0.0105116	0.144556
PSMA5	85.6656	108.435	45.7227	65.6324	90.2521	163.794	74.7322	86.4058	81.4816	86.2345	97.693	132.511	114.436	72.8219	91.5662	77.9059	112.984	74.9533	76.7579	52.8269	60.4745	103.769	98.0995	49.6653	45.856	64.8998	52.8977	73.3836	119.147	79.12	77.019	64.5303	54.7934	69.9608	0.0734874	0.370995	6.41445	0.0106117	0.145789
CCDC149	34.2975	49.983	31.7176	32.5657	24.7823	13.3553	46.4656	27.2058	36.4862	36.0861	23.6501	17.5265	28.7942	21.9343	27.2372	37.1609	29.3614	43.7227	64.2999	34.2541	45.2726	33.4701	39.8904	61.9587	30.3682	31.6117	59.167	31.7686	25.1261	34.4	28.1256	33.1159	45.501	35.3802	0.0689775	-0.396335	5.23389	0.0106586	0.146224
PKI55	0.15661	0	0.961138	1.00202	0.369886	0	0.193607	0	0.128927	0.310196	0.545771	0.663883	0.092586	0.219343	0.13687	0.282951	0.287857	0	0.803748	2.44672	1.22059	0.231627	0.342407	0.61467	0.303682	1.55664	0.783669	0.557344	2.10735	1.18621	0.830714	2.48697	1.28172	0.799552	0.00165822	-1.40635	1.43626	0.0106643	0.146224
KLHDC3	20.2027	19.9932	54.2357	27.1798	13.5008	13.5088	12.778	22.2	17.534	20.9899	37.8401	20.9787	26.0167	35.6798	28.8796	39.0473	58.147	25.2502	23.7106	60.0558	31.9571	21.0781	30.303	27.6602	22.7762	34.0066	44.963	46.0738	33.5556	36.2979	54.2337	55.7604	56.3956	67.3623	0.143403	-0.53006	5.17689	0.0106848	0.14636
SLC25A35	10.4929	8.05282	6.72797	14.9051	9.0622	10.7457	12.0036	10.8823	11.6034	6.10052	8.73234	11.1532	10.3696	9.7242	6.84351	7.45105	12.8096	7.97375	5.82717	6.78408	7.21255	10.8865	5.99212	4.91736	6.83285	10.8965	4.11426	5.38766	9.40204	9.37104	6.17102	4.58126	5.60751	9.59463	0.00381334	0.444642	3.40837	0.0107226	0.146734
SLC9A7	4.38507	4.44293	7.68911	7.26465	3.69886	5.52633	11.6164	6.31176	10.0563	5.37673	2.54693	7.03716	6.01809	2.85146	3.42176	3.58405	1.15143	6.91058	10.4487	7.11772	8.65506	8.5702	9.07378	6.39257	6.68101	14.4887	9.59995	5.945	8.91573	13.0483	5.22163	8.24626	3.52472	2.99832	0.0380594	-0.549359	3.14117	0.0107777	0.147345
GAB3	25.9972	22.6312	25.6761	28.1818	25.3372	20.7238	27.8794	17.4117	21.6597	18.8186	18.3743	26.0242	24.5353	24.0546	22.173	26.0315	18.2789	28.8384	39.7855	26.3578	28.7392	26.2897	27.7349	34.0527	23.0798	29.2169	24.7835	19.1355	29.8272	30.8414	23.616	31.0216	32.0429	25.3858	0.0154759	-0.298696	4.80948	0.0108081	0.147471
TOP1MT	33.6711	27.9072	56.5699	24.9253	14.9804	14.5834	37.5597	44.8352	34.1655	32.0536	16.1912	18.9871	24.1649	21.7149	23.8154	36.7837	29.2174	40.799	41.1921	67.0623	40.8341	36.2496	28.9334	51.2635	58.9143	32.6894	85.0281	26.5667	22.8567	25.7407	18.8691	35.6029	41.015	31.9821	0.121046	-0.493154	5.21682	0.0108049	0.147471
KRT23	1.87932	3.05452	7.82641	1.37778	0.369886	0.767547	0.58082	1.30588	0.644633	0.413595	0	2.38998	2.03689	0.5118	0.13687	1.69771	0.143928	4.25267	2.00937	5.67194	4.88234	1.15814	2.56805	0.122934	2.73314	1.67638	2.8408	5.20188	4.37681	3.67724	1.42408	2.74875	5.12687	0.399776	0.130993	-0.972263	2.10003	0.0108462	0.147847
C11orf24	19.263	16.2445	15.1036	22.4202	28.8511	31.1624	15.8758	20.4588	21.1439	28.4346	27.1066	18.456	16.11	26.248	31.0695	10.8465	15.2564	19.4028	9.84591	19.0177	18.7526	18.0669	14.0387	13.7686	18.0691	18.2007	11.0693	18.3923	10.0505	17.0814	22.904	14.66	14.2591	17.5901	0.0397889	0.387832	4.39616	0.0109049	0.148502
FAM78A	71.4141	59.8408	74.6942	139.03	85.9984	50.8116	81.7021	91.194	68.3311	98.6423	96.2377	67.9817	77.7722	95.5604	119.077	111.86	146.519	73.3585	121.969	183.615	142.919	65.5505	127.033	108.551	65.899	154.945	171.82	103.666	118.498	117.197	122.946	134.427	84.7536	117.934	0.0912796	-0.401455	6.75645	0.0109176	0.148531
WRB	7.04744	9.44123	5.90414	6.76364	7.39771	7.06143	9.87394	3.69999	5.02813	4.65294	7.82272	6.50606	8.14757	8.62749	3.14802	5.84766	14.105	10.233	11.8553	9.34201	9.54276	8.80183	8.73137	9.22005	6.83285	10.8965	7.73873	7.61703	9.40204	8.06621	12.6981	6.54465	11.215	16.7906	0.0116821	-0.457036	3.40026	0.0109599	0.148961
CBWD6	5.79456	13.19	4.53108	7.26465	10.7267	12.2807	8.5187	6.31176	5.02813	10.8569	6.18541	5.84217	7.59205	5.41046	15.6032	10.3749	8.77962	7.17638	6.22905	5.33829	4.66042	7.18044	6.50573	6.39257	5.1626	3.23302	6.46527	4.45875	5.67365	5.10069	6.88306	10.3405	5.60751	3.99776	0.0164248	0.501608	3.21812	0.0109827	0.149125
DHCR24	2.81898	0	1.64767	3.13131	4.25369	1.07457	0.968034	2.39411	1.67604	6.41072	3.45655	3.18664	1.66655	2.12031	7.25412	1.98066	5.18142	1.19606	0.602811	4.33736	0.443849	1.15814	0.171203	0.368802	1.21473	1.67638	0.489793	0.743125	2.59367	0.830345	2.25479	3.27233	1.44193	1.79899	0.0570894	0.930965	2.07871	0.0110376	0.149712
SPATA2	9.86642	7.91397	21.2823	16.9091	9.61703	8.75003	11.4228	5.22352	8.2513	11.5807	13.8262	6.63883	8.98084	9.79732	14.5082	15.2794	8.77962	14.3528	6.02811	17.5719	18.7526	9.72834	12.669	16.842	15.3359	16.1651	19.004	19.8786	11.0231	10.7945	14.1221	14.0056	21.1483	16.3908	0.043895	-0.437502	3.92863	0.0110473	0.149712
NHP2L1	146.743	154.67	81.9714	104.836	138.152	173.926	142.301	200.67	156.775	166.472	153.544	139.681	146.564	125.83	153.158	109.408	177.895	130.637	126.992	99.7594	112.072	147.083	126.862	108.305	98.8485	101.66	108.048	125.96	112.176	109.25	127.93	112.699	122.885	139.522	0.0434577	0.284735	7.08072	0.0110953	0.150217
RGS18	88.0147	231.31	32.816	106.715	120.028	502.436	162.823	36.5647	121.578	121.597	137.17	209.389	185.913	215.687	135.091	65.3617	106.219	114.423	89.216	79.0735	67.5761	140.713	126.69	71.9164	134.683	88.2494	51.1344	102.18	148.974	103.2	159.972	88.3528	57.1966	60.3662	0.216413	0.59844	7.00354	0.0111073	0.150232
RPS3A	1092.98	1972.38	1469.44	741.871	770.287	1028.21	1410.04	1172.25	2078.55	935.448	1329.86	2261.98	2085.5	1549.66	904.575	929.966	974.25	1569.5	1699.73	1253.83	1673.42	2404.4	2122.07	1232.17	1464.81	1509.58	1617.1	2104.72	2785.76	2008.25	2010.92	1351.6	1357.18	1414.61	0.0971884	-0.393899	10.6032	0.011118	0.150232
GAPT	19.263	27.3518	14.0052	18.4121	19.0491	52.0397	24.7817	4.13529	16.1158	14.4758	12.9166	22.572	18.5172	20.6913	22.7205	11.4124	12.9535	16.7449	13.2618	13.0121	10.4305	18.7618	15.7507	18.686	10.0215	13.6505	10.8734	12.8189	18.4799	16.0138	16.7329	10.0788	9.93331	8.19541	0.0880568	0.487154	4.23125	0.0111949	0.150835
FAM214A	16.6006	15.2726	28.4222	20.1657	15.7201	13.6623	20.7159	20.8941	14.4398	16.5438	18.1924	11.5516	19.2579	19.0097	10.9496	23.8622	13.5293	25.1173	29.5377	19.9074	20.75	17.4878	16.0931	25.4473	23.6872	24.068	23.3142	24.7089	14.4273	27.1641	19.3438	25.7859	26.7558	15.5913	0.0272258	-0.353797	4.4742	0.0111927	0.150835
IMPDH2	24.4311	11.8015	35.974	15.2808	8.32243	11.6667	18.7799	26.7706	34.1655	15.5098	21.8308	13.1449	17.6839	28.8802	17.5194	20.0895	23.8921	23.3897	29.3368	31.14	26.0761	23.8576	22.4276	18.9318	20.1949	38.3172	29.7794	41.0577	15.7241	27.9945	31.0924	26.5713	29.7999	23.7867	0.0693729	-0.421434	4.70324	0.0111908	0.150835
CARD6	9.70981	4.9983	4.66839	7.1394	10.3568	15.6579	3.09771	5.22352	4.12565	9.61608	12.7347	7.16994	5.74033	9.35863	18.8881	8.8658	13.6732	4.65135	2.61218	10.6766	2.10828	4.51673	3.76647	3.19628	6.07364	3.95147	3.13468	6.31656	2.59367	4.86345	13.7661	9.81698	6.72902	6.39642	0.118301	0.638792	3.22773	0.0112709	0.151711
ADAM15	99.6038	82.3331	88.0128	131.515	100.054	33.9256	75.5066	73.9999	86.6386	69.0703	84.4126	100.645	122.306	42.0407	83.4909	83.0933	101.901	89.1731	110.917	132.123	113.736	104.695	115.733	89.0042	89.8899	133.871	111.477	83.9731	104.557	174.61	82.5967	106.94	97.4105	107.74	0.0696298	-0.355333	6.65043	0.0112953	0.151794
KIAA1715	17.3837	17.3552	14.9663	14.2788	14.7954	18.1141	14.7141	15.0176	16.6315	11.1671	10.9154	16.1988	19.2579	16.5969	11.634	18.2975	11.8021	19.4028	31.7481	13.5682	16.4224	24.205	22.9413	22.8657	11.3881	23.4693	17.6326	12.6331	23.1809	21.2331	13.6474	17.0161	20.9881	17.1904	0.01963	-0.355813	4.28681	0.0112987	0.151794
DCUN1D3	31.1654	20.6874	26.7746	7.76566	30.7005	12.2807	21.2967	63.3352	26.6878	17.6812	19.102	8.09938	9.44377	8.40815	12.5921	14.7135	10.3628	24.7186	16.4768	7.34015	11.651	15.7506	12.4978	14.875	19.132	14.1295	8.32649	18.3923	7.6189	6.88	7.35775	10.0788	12.8172	13.5924	0.169302	0.603851	4.22698	0.0113388	0.152186
C14orf159	7.36066	9.85776	7.5518	11.7737	14.7954	24.2545	15.4885	4.35294	3.60994	12.0976	9.09619	14.4727	10.5548	6.50717	11.9077	15.2794	11.5143	5.44873	9.04217	8.56351	5.881	6.36974	9.75859	6.39257	8.35126	6.34629	6.56323	4.45875	8.59152	9.96414	5.69632	11.3877	11.215	7.99552	0.0501443	0.508076	3.53781	0.0113657	0.152295
SNAPC3	46.1999	40.5418	23.8912	42.7111	54.5581	139.079	55.5651	23.2882	42.4168	41.7731	45.8448	36.7791	46.4782	77.0625	47.494	22.3531	31.9521	43.0583	46.8183	37.4793	25.6323	41.6929	37.8359	31.9628	38.1121	26.7023	24.9795	30.2823	35.5008	42.4662	43.6718	38.7443	18.7451	18.9894	0.117306	0.473999	5.44641	0.0113715	0.152295
ZNF318	45.7301	35.2658	38.0336	24.9253	29.036	15.5044	26.5241	18.5	41.7722	34.742	18.5562	28.0159	40.6452	31.1467	26.5528	29.8985	18.135	49.703	42.1968	40.3708	30.1818	45.0515	34.7543	56.0579	32.9495	49.094	46.4324	29.5392	31.4482	37.0097	31.5671	35.472	30.4408	22.1876	0.0554736	-0.36829	5.1768	0.0113832	0.152295
EIF2D	7.36066	6.24787	8.37563	4.63435	5.54829	4.14475	8.32509	10.2294	11.3455	7.6515	10.1877	5.04551	6.20326	9.2124	7.39099	8.01695	7.77213	8.10665	11.0515	8.67473	7.76736	10.3074	8.56017	9.95765	8.35126	6.945	11.951	10.7753	7.9431	14.1159	12.6981	10.6023	11.8559	11.7934	0.00165822	-0.431632	3.45161	0.011401	0.152295
FAM124B	0.469829	0.83305	0.411916	1.12727	0.554829	0.153509	0	1.52353	0.644633	0.723791	0.545771	0.265553	0.555516	0.658029	0.547481	0.188634	0.431785	1.19606	2.41124	2.22429	1.7754	1.50558	1.19842	2.21281	2.42946	1.31716	2.15509	0.743125	0.648417	0.948966	0.71204	1.70161	1.76236	0.99944	0.00165822	-1.26599	1.62444	0.0114014	0.152295
HIPK3	177.909	191.601	206.919	135.899	137.782	126.031	171.923	133.2	224.848	169.884	115.158	154.552	206.467	213.128	156.99	154.963	110.537	198.945	207.568	230.881	143.252	255.253	137.99	218.331	199.064	268.58	227.46	208.261	157.079	196.792	206.966	204.586	209.401	155.913	0.0564487	-0.31203	7.54905	0.011436	0.152611
CD52	455.421	943.707	572.015	301.358	267.242	1309.13	1305.1	1107.39	668.871	673.125	1428.28	800.776	842.995	1084.5	744.711	412.731	1079.61	356.958	756.528	341.428	288.502	251.2	511.727	1149.56	340.124	410.833	285.354	1000.06	534.944	755.495	689.848	414.146	651.273	724.194	0.19279	0.553793	9.44996	0.0114755	0.152992
HADHA	210.17	228.533	244.129	157.317	168.113	113.597	200.577	278.153	369.374	213.105	190.11	194.916	213.503	260.799	175.605	225.606	236.33	256.755	253.583	260.575	215.6	278.532	253.381	223.125	250.386	315.998	322.088	289.076	251.424	287.537	276.984	226.445	267.879	280.843	0.0555703	-0.306265	7.9436	0.0114916	0.153061
GNG5	254.021	277.822	160.922	248.251	222.856	274.782	260.788	604.187	337.53	259.117	381.858	221.472	201.467	263.431	316.17	155.246	238.921	232.834	235.9	152.03	258.098	217.498	218.455	207.144	176.591	233.735	158.595	271.426	263.743	154.207	249.451	148.171	184.087	243.264	0.0807303	0.364793	7.9551	0.0115621	0.153853
BTG3	4.22846	7.77513	10.9844	3.75758	3.69886	3.68422	6.77624	11.7529	4.12565	4.23935	3.0927	3.85052	5.46257	1.68163	1.77931	2.45224	2.87857	4.38556	4.82249	1.00093	6.10293	3.82185	2.39685	3.81095	4.25155	2.39483	2.8408	0.743125	3.56629	2.01655	1.06806	1.43982	2.72365	1.79899	0.062223	0.705293	2.56693	0.0115954	0.154149
TATDN3	29.4426	24.4361	15.6528	20.0404	22.563	46.0528	26.9113	20.6764	24.3671	19.1288	22.9224	31.7336	22.7761	31.2929	24.9104	18.8634	23.0285	24.9844	18.8881	15.4588	15.4238	22.4678	28.591	14.3833	18.3728	23.5891	13.8122	16.5345	30.3135	15.3021	20.4118	16.0998	10.8946	20.5885	0.0390685	0.367502	4.60378	0.0116462	0.154678
INTS8	34.7674	45.6789	26.7746	37.701	33.4747	45.4388	41.4318	18.5	30.2977	33.9148	26.197	52.0485	45.4597	28.9533	28.6059	34.803	31.0885	40.0016	51.8418	47.1549	36.2847	45.1673	55.6411	40.8141	30.8237	31.3722	42.71	36.4131	47.6586	56.7007	39.3996	41.8858	39.4128	49.1725	0.0367593	-0.31246	5.37518	0.0116916	0.155133
ODC1	103.049	72.4753	66.5932	56.6142	67.3192	85.0442	81.7021	158.664	71.941	86.4413	87.5053	36.6464	54.1628	74.0648	100.052	54.8925	47.6403	85.3191	45.8136	46.4876	63.2485	65.7821	40.2328	43.3957	85.6384	51.1296	50.0569	78.7713	27.0714	40.6869	44.8585	57.462	65.0472	75.3578	0.0961691	0.417383	6.12146	0.0117744	0.156084
FAM134A	102.11	83.8604	85.2667	110.348	86.3683	81.3599	81.8957	74.4352	91.0221	46.2192	78.9549	58.0234	91.6601	49.7908	72.815	83.6592	75.9941	97.8113	118.553	85.3015	125.276	92.4192	120.356	126.868	58.6106	139.139	86.7914	73.012	101.153	118.977	67.4065	114.008	80.7482	77.5566	0.0569413	-0.326218	6.52771	0.0118057	0.156192
CD99L2	10.8061	11.2462	24.8523	13.1515	7.02783	8.75003	10.4548	6.9647	10.0563	7.8583	7.27695	12.0827	10.74	8.04257	11.4971	14.9021	18.2789	10.7646	11.2525	17.0158	18.7526	8.45439	10.6146	17.5796	9.2623	20.356	15.6734	13.9336	15.0757	15.4207	12.9354	23.1681	18.9053	24.3863	0.0553836	-0.451566	3.96975	0.0118161	0.156192
TNFRSF10C	14.0949	22.4923	16.3394	17.2849	5.54829	11.0527	8.90591	1.95882	7.86452	5.58353	9.82388	6.10773	11.2029	24.2008	13.4133	21.8816	13.5293	14.3528	17.0796	20.3522	19.8623	12.5079	13.0115	16.2273	6.98469	14.0097	13.3224	20.6217	8.59152	14.1159	30.143	22.9063	32.6838	41.3768	0.164204	-0.600982	4.15775	0.0117969	0.156192
MAP4K4	2.97559	2.08262	7.13989	0.626263	3.8838	1.99562	1.16164	3.2647	2.70746	2.79176	2.18308	2.12443	1.38879	4.02129	4.37985	4.90449	4.46178	4.25267	4.42061	8.78594	3.66176	2.66371	2.73925	5.04029	4.70707	3.35276	6.36731	4.64453	2.59367	2.8469	4.27224	6.15197	9.45266	6.59631	0.0152799	-0.655832	2.5954	0.0118555	0.156564
RSBN1	14.0949	10.9685	14.1425	20.7919	13.1309	16.1185	10.842	15.2353	14.9555	11.684	9.27811	14.0743	13.7027	16.0851	14.9189	14.5248	12.9535	12.3593	20.4956	18.0167	17.754	12.9711	20.7156	22.374	13.9694	26.5826	21.7468	11.7042	23.9914	19.0979	14.8342	19.2413	12.1763	13.7923	0.0176849	-0.354988	4.17567	0.0118784	0.156578
MEGF9	238.83	330.165	407.935	279.564	267.242	134.781	252.076	153.876	260.56	382.782	330.737	287.196	299.33	317.755	376.804	478.47	361.692	324.797	529.67	505.915	268.418	294.977	281.458	374.949	312.033	338.509	510.756	450.52	354.198	276.505	406.456	391.37	559.309	513.313	0.0933046	-0.387062	8.47773	0.011879	0.156578
RFX2	11.1193	4.44293	9.74869	6.26263	3.14403	2.76317	6.19542	9.35881	3.99672	2.48157	2.54693	6.63883	5.83292	2.41277	1.23183	4.52722	2.44678	8.63823	4.01874	6.00558	8.65506	5.67486	8.04656	7.13017	10.477	8.9806	7.05302	8.73172	8.91573	7.82897	5.10296	4.84304	3.68494	9.79451	0.0267114	-0.539158	3.04066	0.0119261	0.157051
NUBP1	50.7416	51.0937	31.9922	41.2081	54.0033	49.8905	57.114	55.9352	56.9855	55.4217	38.204	46.2063	46.0152	38.0194	41.8823	32.1621	54.6927	47.8425	40.5893	43.7073	28.5173	48.0626	37.6647	40.4453	38.5676	47.5373	29.4856	37.8994	35.9871	38.9076	32.9912	33.2468	33.1644	36.9793	0.0282575	0.284721	5.49861	0.0119697	0.157477
NDUFAF3	54.8134	45.1235	40.0932	52.4808	56.4076	38.8379	55.1779	82.2705	70.0071	71.8621	104.242	43.1524	46.7559	83.3503	84.8596	45.8381	66.6388	42.7925	33.1546	39.5923	54.2606	42.5036	42.972	38.2325	43.2747	56.1587	41.8284	74.3125	33.7177	33.8069	76.0696	43.4565	31.5623	60.3662	0.0792106	0.390486	5.82258	0.0120493	0.158375
PCMT1	23.6481	47.0673	14.9663	15.9071	31.0704	31.1624	21.2967	11.3176	33.263	33.6046	26.197	26.157	22.591	28.3684	33.9438	16.9771	21.7332	26.9779	34.963	16.6822	14.5361	22.0046	17.1203	16.719	16.247	17.7217	18.7101	15.0483	21.722	20.9959	20.6492	19.1104	17.4634	13.7923	0.0573174	0.39685	4.638	0.0121625	0.159712
TCP11L1	19.8894	15.5503	17.3005	13.0263	17.1997	8.75003	14.7141	16.5412	13.5373	15.82	15.2816	13.2777	16.2025	13.5993	13.0027	13.4873	14.3928	20.2002	16.075	18.128	13.4264	23.5101	21.2292	15.8585	26.8759	15.5664	16.2611	21.1791	14.4273	17.3186	15.7836	22.7754	15.0602	20.5885	0.0114312	-0.331283	4.23836	0.0121759	0.159738
COX6A1	424.256	486.64	273.65	289.709	419.82	534.673	400.96	605.058	464.007	431.379	558.506	435.375	389.509	463.106	523.118	318.131	492.523	368.653	341.392	263.912	348.533	414.728	466.7	285.207	329.04	317.794	302.594	436.586	400.884	343.644	439.091	332.73	332.445	369.393	0.0519118	0.289795	8.66731	0.0121906	0.159781
UPK3A	2.03593	1.11073	1.92228	4.38384	4.99346	7.52196	2.12967	4.35294	2.06282	3.61895	4.00232	2.92109	2.31465	4.45997	7.39099	2.07498	5.75713	2.12633	1.00469	1.66822	2.44117	2.31627	1.02722	2.82748	0.759205	1.31716	2.44897	1.85781	3.24208	1.77931	2.13612	3.01054	2.56343	3.99776	0.00165822	0.741883	2.3184	0.012241	0.160292
CBWD1	18.7932	30.2675	13.3186	13.402	8.13749	28.5527	15.2949	19.1529	11.8612	21.8171	25.2874	15.4021	9.9067	9.2124	31.0695	7.63968	20.2939	13.0238	21.0984	14.5691	7.6564	11.813	21.5716	12.1705	10.1734	9.33983	10.7755	15.0483	12.8062	9.60828	12.1047	9.94787	7.85052	12.9927	0.0809441	0.478567	4.10746	0.0122538	0.160309
MRPL50	10.3362	17.3552	3.29533	10.897	13.8707	47.1274	14.1333	12.8412	11.8612	10.1331	15.4635	27.2192	13.425	15.5002	12.5921	8.2999	9.21141	12.4922	8.84123	7.6738	9.98661	14.2451	11.2994	5.7779	7.74389	11.1359	6.85711	11.89	15.7241	9.01518	16.3769	4.71215	7.04944	7.39586	0.122875	0.569842	3.86131	0.0122878	0.160603
SCAPER	5.63795	10.552	7.00258	4.7596	9.24714	8.75003	9.29312	8.70587	8.2513	11.2705	7.6408	5.97495	8.98084	5.70292	8.48596	8.48854	5.90106	4.38556	9.2431	4.89344	4.77138	7.29625	8.90257	5.90083	5.9218	5.98707	4.70202	3.90141	4.37681	5.10069	5.3403	4.18858	5.12687	4.59743	0.00165822	0.486867	3.14424	0.0123454	0.161205
ARL3	18.0101	25.9634	32.5414	17.1596	14.6105	20.2632	18.9735	25.247	27.4613	26.8837	29.4716	20.8459	23.7946	30.7811	27.9215	15.3737	19.7182	22.8581	29.5377	26.2466	23.0802	24.6683	27.0501	22.0052	23.0798	23.2298	36.7345	46.8169	27.7198	28.3504	40.5863	26.5713	29.1591	46.1741	0.0465673	-0.363065	4.85012	0.0123694	0.161369
IL32	1.25288	0.416525	1.37305	0.125253	0	0.153509	0.58082	13.7117	0.773559	2.58497	1.27347	0.929437	0.833274	1.82786	1.09496	0.565902	1.58321	0.398688	0.602811	0	0.443849	0.231627	0	0.122934	1.51841	0.598707	0.293876	0.185781	0.486312	0.118621	3.08551	0.130893	0.640859	0.399776	0.548048	1.44401	1.66229	0.012485	0.162279
CD79B	33.3579	9.02471	24.8523	16.1576	16.6449	55.8774	20.3287	21.3294	35.5837	28.538	35.4751	23.1031	14.1657	62.5127	34.0807	7.82832	38.141	15.283	7.43467	12.0112	15.6457	11.0023	8.73137	5.28616	17.7654	27.1813	6.85711	38.6425	14.7515	18.8607	37.0261	39.137	8.65159	11.9933	0.242359	0.669022	4.64826	0.0124696	0.162279
BRF2	3.60203	3.19336	3.29533	12.6505	3.69886	6.29388	2.9041	6.09411	3.48102	4.23935	4.54809	5.57662	5.18481	7.31143	9.17031	8.8658	9.35534	3.0566	11.6543	9.00837	7.76736	3.82185	10.101	8.48245	5.46628	6.46604	10.1877	4.64453	13.941	13.1669	6.52704	10.0788	8.81181	10.9938	0.0470784	-0.537031	3.21446	0.0124705	0.162279
PDPR	13.3118	16.3833	32.4041	28.3071	18.1244	10.1316	16.0694	10.447	6.83311	15.7166	8.00464	15.0038	14.536	11.8445	9.85466	49.8937	15.976	17.5423	29.3368	43.04	38.8368	20.7306	15.9219	24.5868	11.9954	22.6311	41.5345	10.9611	25.6125	14.8276	14.9528	22.5136	70.174	22.1876	0.20334	-0.622957	4.59443	0.0124857	0.162279
DGCR8	11.9023	11.2462	12.6321	11.5232	7.58266	8.44301	10.4548	4.78823	7.60666	5.79033	9.46003	11.6843	12.962	9.79732	6.15916	11.9783	7.05249	13.0238	14.6684	15.7925	12.6497	10.3074	14.0387	14.5062	10.0215	14.2492	11.1673	10.4038	11.0231	13.76	12.4607	10.4714	11.5355	9.39474	0.00410558	-0.387328	3.70604	0.0125768	0.163312
TMEM43	25.3708	17.2164	31.7176	17.1596	15.5352	16.4255	17.8118	22.8529	17.4051	23.9885	16.5551	18.3232	23.9798	19.814	15.6032	26.3145	31.3764	27.3765	20.0937	29.4718	17.0882	24.5525	20.3732	24.5868	34.9234	20.9547	32.2284	29.9108	22.6946	34.2814	29.6683	24.477	19.7064	43.1758	0.0428032	-0.361028	4.7157	0.0126817	0.16452
TOMM20	164.127	216.176	151.036	113.604	115.774	146.448	161.662	201.541	213.889	123.561	155.181	166.768	187.394	141.988	118.667	139.872	131.263	182.599	211.587	145.246	190.078	222.594	257.147	171.001	149.563	184.402	191.019	195.813	194.525	193.352	165.312	171.732	202.351	154.114	0.0447586	-0.277817	7.45442	0.0127276	0.16489
RCOR1	90.0506	82.4719	112.865	95.5677	74.9019	51.4256	91.1888	102.947	83.8022	72.1723	59.671	79.5332	105.178	78.1592	70.7619	102.617	70.6688	121.467	98.0573	102.762	104.527	98.5573	81.3216	110.026	131.95	119.262	111.085	80.0717	90.9404	93.4731	72.7468	120.16	97.5707	97.9451	0.0460814	-0.294793	6.58534	0.0127456	0.16489
ACACB	3.75864	4.58177	13.044	3.25657	4.62357	3.83773	7.55066	4.78823	4.89921	4.13595	2.18308	5.57662	6.85136	3.5826	2.87428	9.24307	3.45428	4.91715	4.62155	9.34201	6.43581	5.79068	6.33452	9.46592	11.3881	7.90293	14.302	5.01609	7.13258	8.54069	3.08551	7.72269	16.6623	4.39754	0.0738899	-0.595848	3.10818	0.012743	0.16489
SLC16A1	7.67388	6.94208	7.5518	5.76162	9.24714	3.99124	12.9717	7.39999	8.50915	9.82287	8.18657	10.7549	6.20326	4.75243	4.37985	5.56471	5.03749	10.7646	10.6497	13.1233	6.99063	15.0558	9.24498	10.5723	13.8175	9.93854	10.4816	6.50234	7.13258	12.0993	8.42581	7.5918	8.01073	7.79563	0.008021	-0.437544	3.42509	0.0127656	0.164997
INPPL1	148.153	149.394	155.842	185.624	120.953	65.395	149.464	129.717	97.4685	101.331	99.6942	160.129	145.73	83.131	96.2198	172.412	129.823	169.841	153.315	184.727	174.877	141.524	134.395	178.254	178.717	168.476	171.036	121.873	156.431	152.309	111.316	159.82	182.164	160.11	0.0583063	-0.315422	7.20593	0.0127793	0.16502
COX17	72.8236	157.169	83.7563	55.9879	70.0933	114.211	122.94	92.2822	87.0254	78.6864	130.803	98.3875	101.289	115.374	102.379	45.7438	68.0781	78.1428	71.9355	54.0502	66.3555	101.453	86.1153	59.7459	81.3868	81.5439	71.9017	97.3494	68.0837	49.3462	105.857	47.776	32.844	55.7688	0.0859851	0.387136	6.41662	0.0128007	0.165145
PDLIM5	112.916	142.452	83.3444	109.596	104.308	149.979	98.3522	114.917	109.845	99.3661	138.808	111.665	95.0858	137.309	122.088	99.6931	120.18	91.2994	94.6413	93.3089	77.3407	95.3145	100.154	77.6943	115.096	93.2785	68.767	98.2783	93.0478	90.6262	107.993	123.17	55.9149	109.139	0.0439111	0.285741	6.74413	0.0128363	0.165451
RNF125	27.8765	31.5171	20.3212	17.2849	29.036	17.5001	33.6876	8.27058	23.7225	33.9148	34.2017	27.7503	29.6275	24.8589	17.3825	21.8816	19.4303	33.4898	32.5518	41.1493	20.639	33.3543	26.7077	32.0858	45.0968	21.7929	27.7223	47.1884	21.722	45.3131	36.9074	23.1681	27.5569	24.986	0.0614556	-0.384971	4.93625	0.0129691	0.166706
ZNF609	41.5016	28.046	106	41.3334	38.0982	24.408	30.5899	36.5647	32.8763	48.7008	31.6547	32.2647	37.4973	47.8168	56.1168	60.3629	37.7092	56.082	50.4352	86.9697	46.7151	42.6194	31.159	63.9257	63.9251	55.56	72.8812	56.8491	35.825	53.7352	54.5898	70.0278	84.1127	48.9726	0.0980968	-0.425947	5.72924	0.0129695	0.166706
PKP2	1.09627	0.555367	8.23833	0.876768	0.554829	0.153509	0.193607	1.74117	0.902486	0.620392	0.727695	1.19499	0.833274	0.877372	1.64244	1.32044	0.143928	0.930271	0	7.22894	1.44251	2.5479	0.171203	1.35227	3.49234	3.35276	5.48569	7.24547	2.59367	3.08414	1.66143	2.09429	5.28708	0.599664	0.281604	-1.10862	2.04312	0.0129627	0.166706
SLC5A6	7.20405	6.38672	8.51294	10.396	4.25369	5.98686	6.96984	4.13529	5.67277	6.20392	6.9131	8.49771	6.75878	5.55669	2.7374	6.69651	5.90106	7.30927	12.2572	10.6766	8.21121	6.94881	7.53295	7.74484	8.80678	12.5728	9.40403	8.54594	8.59152	10.6759	5.93367	6.80644	8.97202	7.19597	0.00165822	-0.451042	3.27383	0.0129945	0.166875
SNORA71B	135.781	196.044	46.1346	56.4889	150.359	112.829	96.4162	261.394	167.347	204.626	362.938	49.2602	65.5509	206.694	299.198	164.206	409.908	125.055	79.5711	62.8362	144.806	79.6797	71.7342	104.863	93.5341	53.2849	164.081	170.733	73.5953	78.5269	163.888	151.181	163.259	151.115	0.24182	0.616247	7.21954	0.0130436	0.167108
MAX	41.8148	38.8757	18.3989	53.2323	44.3863	47.7414	58.4692	33.7352	50.2813	34.6386	41.4786	49.7913	46.5707	35.0218	46.5359	38.8586	45.3374	40.9319	37.1734	25.1345	40.7232	29.9957	39.548	35.405	29.609	51.0098	24.7835	29.725	40.2018	33.5697	37.6195	25.655	28.9989	29.3835	0.0369627	0.31049	5.34906	0.0130486	0.167108
BTBD7	13.9383	9.71892	32.4041	19.9152	11.2815	9.05705	12.778	21.547	10.3141	14.0622	13.4624	9.82548	13.9805	19.9602	17.7931	22.5418	13.0975	13.6883	12.86	42.8176	16.3115	16.793	14.0387	16.1044	15.4878	23.9483	25.3713	23.2227	17.8315	19.3352	23.4973	24.477	32.6838	23.3869	0.0856457	-0.45837	4.37783	0.0130428	0.167108
C4orf33	16.9139	45.2624	9.74869	16.4081	19.0491	33.9256	20.1351	12.8412	13.1505	27.2972	24.0139	27.4848	32.2199	12.6488	18.0669	23.9565	23.0285	15.6817	17.4815	15.1252	13.7593	19.1092	25.3381	15.6126	12.7546	10.7767	17.4366	14.8625	24.964	17.3186	11.8673	10.4714	16.1817	17.9899	0.0685583	0.427774	4.42059	0.0130911	0.167499
POP4	54.187	65.3944	38.8575	47.3455	46.2357	82.7415	59.6309	62.247	60.2087	63.5902	63.3095	77.0105	69.8098	60.758	62.8234	46.7813	61.3134	46.9122	43.8043	42.5951	38.171	52.811	54.9563	39.8306	43.4265	54.3626	46.6283	58.1495	71.8121	42.1104	62.4222	44.5036	37.8107	48.5728	0.0364963	0.288995	5.8344	0.0131218	0.167739
SLC19A2	3.1322	6.6644	6.59066	3.50707	2.21931	1.84211	4.25935	3.91764	2.32068	2.99856	1.27347	1.85887	3.42568	1.90097	1.23183	3.867	0.719641	5.71452	5.62624	3.78129	6.99063	4.74836	3.08166	5.16323	5.76996	5.26862	8.22853	2.22938	3.24208	2.96552	3.32285	3.27233	8.65159	2.19877	0.0114014	-0.625714	2.57379	0.0131799	0.168327
SERPINA1	26.3104	26.3799	26.2253	23.798	24.2275	24.5615	18.3926	45.2705	30.4267	36.1895	35.6571	33.9908	17.4062	28.7339	27.374	20.9384	52.5338	17.5423	18.2853	25.5793	14.2032	12.7395	23.2837	13.1539	21.7133	20.5955	17.2407	30.2823	31.7724	16.6069	25.6334	17.8015	10.0935	47.7732	0.087116	0.438666	4.79275	0.013212	0.168583
FGD2	246.974	205.902	106.137	268.041	314.588	316.843	247.623	124.929	218.402	179.707	110.973	207.796	195.079	114.863	212.423	165.149	196.318	204.66	215.605	110.325	167.775	176.384	192.261	201.243	108.87	177.696	118.432	103.666	176.369	183.625	80.4605	162.569	99.9739	129.527	0.0918973	0.383652	7.49931	0.0132685	0.169005
AFF3	1.72271	1.52726	3.02072	3.50707	1.10966	1.6886	3.29131	1.95882	9.15378	0.516993	0.181924	1.85887	3.9812	3.80194	0.27374	0.943171	0	4.51846	1.20562	2.66915	7.21255	4.86417	4.28008	1.22934	11.2362	12.0939	2.35101	4.64453	1.94525	3.55862	2.49214	4.31947	3.20429	0.799552	0.225187	-0.892697	2.41408	0.0132693	0.169005
FAM192A	79.5578	90.3859	88.8366	89.4303	83.4092	144.913	85.5742	77.6999	70.6517	100.193	90.7799	97.7236	75.365	92.6358	140.703	82.7161	115.43	63.79	87.8095	74.7361	77.2298	71.5728	92.4498	89.6189	60.2809	57.9548	63.6731	70.2253	68.2459	63.5807	82.0033	89.7926	96.4492	83.1534	0.0479686	0.300274	6.46472	0.0133213	0.169051
NT5C2	108.844	119.265	96.2511	137.026	106.897	158.268	108.226	139.512	98.7577	143.724	92.4173	103.699	106.752	106.308	152.063	155.057	146.663	83.3257	120.964	110.436	75.6763	94.0406	110.94	118.14	113.577	83.819	93.8444	67.6244	107.475	83.1531	98.7363	115.579	98.8524	111.338	0.046667	0.289803	6.83541	0.0133154	0.169051
ESYT1	65.7761	52.3433	72.6346	72.0202	45.1261	33.158	42.7871	52.0176	57.5012	46.7362	54.759	77.5416	69.5321	67.6307	48.9995	54.9868	42.171	64.5874	67.5148	87.7482	73.679	49.4524	61.2908	50.7717	58.1551	104.893	69.9425	71.5258	96.6141	87.7793	66.1011	83.9024	61.8429	39.1781	0.0578887	-0.333914	6.04606	0.0132888	0.169051
ENTPD1	48.8623	69.282	69.6139	44.8404	39.7627	27.4782	56.3396	59.6352	53.7624	68.8635	32.5643	61.3428	69.5321	32.7552	41.7454	70.5492	40.7317	58.6071	77.9636	59.9446	45.1617	69.8356	72.0766	75.8503	63.1659	45.6215	77.8771	57.778	58.0333	84.8138	46.876	63.7449	91.4826	68.7615	0.0614618	-0.344585	5.94867	0.0133119	0.169051
AUH	6.10778	9.58007	6.31605	6.38788	8.32243	13.6623	8.13148	12.6235	5.93062	7.13451	9.09619	13.676	10.1845	7.89635	6.98038	8.8658	9.35534	6.91058	6.02811	6.56165	6.7687	7.18044	7.70415	7.74484	5.31444	6.10681	5.6816	5.57344	7.6189	5.69379	7.00173	3.7959	8.49138	4.79731	0.00165822	0.443329	3.28254	0.0133565	0.169344
MRPL17	5.32473	7.77513	0.549222	3.63232	8.69231	12.5878	5.8082	3.2647	3.35209	6.51412	9.09619	7.16994	7.12912	6.43406	6.70664	3.11246	7.19641	4.11977	5.22436	3.33643	3.10695	5.0958	7.87535	3.19628	2.73314	3.35276	2.93876	3.15828	3.8905	5.45655	5.93367	3.14143	1.76236	3.99776	0.0199814	0.583595	2.8388	0.0135041	0.170596
SRSF7	194.979	327.944	327.336	205.414	206.211	318.532	258.852	266.4	223.043	255.912	339.288	246.832	265.259	207.791	258	191.275	240.936	185.921	218.82	158.592	208.387	216.687	234.549	168.543	324.484	214.457	172.113	243.559	231.809	177.575	219.546	203.8	171.91	180.099	0.0492982	0.283612	7.88189	0.0134937	0.170596
BMP2K	81.5937	65.3944	77.5776	68.3879	49.9346	62.4783	67.956	48.0999	79.2898	45.4954	51.4844	63.0689	79.8091	57.541	58.033	51.4971	50.231	76.8138	66.5102	65.7277	77.6736	76.0895	72.2478	73.5145	70.3024	96.2721	55.3466	79.5144	88.0226	79.5945	82.9527	63.2213	61.3622	83.953	0.0358821	-0.275594	6.15411	0.0134692	0.170596
KIAA0825	3.44542	1.94378	3.29533	1.25253	2.5892	1.6886	2.71049	1.95882	4.12565	1.75778	2.36501	3.45219	4.07378	1.46229	1.3687	3.67837	0.86357	6.11321	3.8178	2.78036	2.99598	6.13812	3.59527	3.56509	4.55523	4.19095	3.13468	3.90141	5.51154	7.94759	1.7801	2.48697	3.52472	2.79843	0.00165822	-0.696567	2.41122	0.0134818	0.170596
C17orf103	8.77015	4.16525	6.72797	7.51515	3.8838	5.37283	6.58263	0	4.25458	3.20536	3.45655	7.83382	8.79567	2.92457	0.27374	0.848854	7.19641	9.5685	4.82249	13.5682	9.87565	7.64369	7.36174	12.4163	5.31444	8.50164	5.97548	6.31656	13.7789	11.8621	3.20418	0.392679	0.801073	12.1932	0.172816	-0.705566	3.07414	0.0135207	0.170652
ASB13	1.25288	1.24957	5.62952	2.50505	1.66449	1.07457	1.35525	0.870587	1.80497	2.17137	2.36501	1.7261	2.12948	2.33966	2.05305	3.67837	4.46178	2.25923	2.00937	6.8953	4.10561	2.20046	2.22564	3.31922	1.51841	2.75405	4.5061	3.15828	2.59367	3.20276	4.50959	5.23572	5.92794	7.39586	0.00452497	-0.717055	2.34286	0.0135353	0.170681
PLCXD1	4.07185	2.49915	2.33419	3.25657	3.69886	7.98248	3.48492	7.61764	2.70746	2.58497	4.18425	5.97495	4.35154	8.26192	3.14802	3.11246	4.89356	3.58819	1.6075	0.778501	2.55213	2.31627	1.88324	2.45868	4.25155	2.87379	0.293876	4.45875	3.56629	3.67724	2.96683	4.18858	2.40322	2.19877	0.00165822	0.650619	2.48517	0.013647	0.171317
CSNK2A2	55.4399	55.259	60.4144	63.5031	51.0442	38.8379	54.0163	87.0587	100.305	39.8085	41.4786	49.5257	51.3852	59.4419	40.3767	49.1392	38.5728	64.1887	92.8329	57.6091	86.8835	54.2007	77.8975	69.4577	49.3483	117.586	71.216	77.0992	77.4858	57.2938	53.8777	54.0588	72.2568	47.7732	0.0643541	-0.347452	6.02129	0.0136349	0.171317
VAPB	5.63795	5.55367	10.5725	6.26263	3.32897	8.90354	4.06574	5.44117	6.44633	3.72235	3.63847	9.29437	6.48102	6.94586	8.07534	7.82832	7.77213	4.65135	8.23842	10.899	8.76602	4.63254	9.75859	7.62191	3.64419	12.2136	10.7755	8.17438	12.3199	10.0828	8.78183	12.0422	5.92794	12.7928	0.015042	-0.465606	3.29376	0.0136445	0.171317
CALCRL	2.97559	2.08262	7.27719	4.63435	5.91817	4.29826	6.38902	3.69999	4.51243	3.72235	4.18425	3.9833	3.24051	7.38455	2.60053	4.24427	5.90106	4.78425	4.01874	9.34201	5.54812	9.3809	5.99212	6.1467	12.1473	5.14888	6.66119	4.83031	9.40204	4.50759	7.00173	6.54465	4.16558	5.79675	0.00165822	-0.532526	2.93332	0.0136071	0.171317
RASAL2	1.09627	1.11073	1.23575	1.62828	1.10966	0.614037	0.774427	2.17647	1.16034	1.13739	0.545771	1.19499	1.57396	1.09671	0.821221	1.50907	1.0075	1.86054	1.80843	2.55793	2.6631	2.66371	1.54083	2.21281	2.73314	2.15535	4.70202	2.41516	2.10735	3.32138	1.66143	1.57072	2.56343	1.39922	0.00165822	-0.952154	1.92707	0.0136244	0.171317
MT1F	8.77015	11.6627	4.80569	10.5212	15.9051	7.21494	17.4246	22.4176	9.02486	14.4758	23.832	6.77161	11.7584	7.53077	17.1088	17.4487	16.6957	9.03692	6.63092	6.67287	7.21255	6.94881	8.04656	10.5723	5.9218	9.45957	3.82039	11.89	12.9683	7.71035	12.8167	3.92679	12.657	17.9899	0.0871619	0.51711	3.72971	0.0136909	0.171539
AAED1	22.2386	30.2675	5.49222	12.5253	24.2275	19.0352	15.1013	27.4235	22.5621	17.6812	24.7416	18.9871	19.7208	15.7196	17.7931	13.8646	17.1275	19.137	23.5096	6.67287	11.9839	19.3409	21.058	14.9979	11.5399	15.2072	9.89383	13.562	13.2925	13.6414	17.6823	8.90073	11.0548	10.9938	0.0494496	0.405833	4.23664	0.0137086	0.171539
ADPRH	15.0345	12.0792	10.9844	13.402	16.4599	21.1843	11.6164	6.5294	13.6662	15.0962	15.4635	17.261	8.98084	12.9412	14.5082	13.393	18.4228	11.0304	14.2665	8.56351	10.5414	10.1916	15.7507	13.1539	8.95862	11.3754	8.32649	11.7042	11.5094	8.30345	13.4101	4.58126	5.12687	12.9927	0.0163915	0.382813	3.84914	0.0137138	0.171539
NEU3	4.38507	2.36031	8.10102	7.1394	5.36334	1.84211	5.22738	10.6647	3.22316	3.92915	2.91078	4.51441	4.53671	1.97409	4.79046	11.9783	6.33284	4.91715	6.42999	12.1224	10.3195	5.55905	5.1361	8.60538	9.11046	6.945	7.93465	3.34406	5.83575	8.30345	2.84816	12.4348	12.1763	11.3936	0.0670499	-0.581977	3.11532	0.013701	0.171539
PPP2R3C	33.5145	73.0307	25.2642	27.4303	33.4747	73.0704	36.9789	60.9411	69.7492	41.1527	72.7695	72.3633	74.1614	73.553	64.8765	45.4608	40.8756	37.6095	44.608	28.026	24.7446	36.3655	47.4233	35.7738	30.5201	47.5373	31.6406	53.3192	64.3554	46.4993	56.3699	36.3883	35.5677	33.3813	0.0856698	0.400747	5.63919	0.0137861	0.172197
CASP4	473.431	754.743	441.712	374.505	506.374	794.411	558.943	475.993	593.707	679.019	589.615	576.384	663.286	555.084	737.868	647.675	594.424	458.225	460.749	445.08	273.078	538.186	725.217	335.241	520.815	425.321	506.838	500.123	553.91	422.883	535.098	340.845	492.82	507.116	0.0605417	0.304974	9.07518	0.013794	0.172197
GPR107	16.444	19.5767	39.1321	24.1737	17.9395	21.4913	16.0694	23.7235	13.4084	14.6826	15.8274	18.9871	18.5172	17.913	22.5836	30.7474	22.8846	17.6751	29.3368	35.0326	21.4157	19.9199	28.7622	34.5445	16.5507	25.6247	28.8978	16.9061	31.2861	26.9269	21.2425	32.0688	39.0924	30.1831	0.0506993	-0.373766	4.70939	0.0138105	0.172197
NEGR1	0.15661	1.11073	2.74611	0.50101	0.369886	0.307019	0.774427	0.870587	1.41819	0.413595	1.09154	0.663883	0.555516	0.365572	0.821221	1.03749	0.287857	1.19606	3.01406	3.114	1.22059	2.20046	0.684813	1.59814	3.03682	2.75405	1.27346	3.52984	1.62104	1.18621	0.71204	0.392679	0.961288	1.39922	0.00165822	-1.04729	1.72911	0.0138157	0.172197
VPS51	66.8724	42.6244	55.8833	67.5111	49.7496	24.8685	47.24	21.9823	66.1393	16.4404	27.4705	41.8247	48.4225	29.2457	32.712	31.7848	37.7092	68.5743	59.0755	38.8138	110.297	59.8756	54.2715	73.7604	30.9756	96.8708	36.0488	40.6861	58.3575	64.6483	40.3489	39.6606	40.8547	44.1753	0.110991	-0.444366	5.6848	0.0138478	0.172443
CPSF7	87.2317	64.8391	51.0776	88.0526	73.0524	62.7853	78.2171	72.694	67.1707	57.0761	44.0255	80.3299	84.6236	52.2767	44.7566	74.1332	68.222	92.6284	87.8095	68.7305	95.3166	88.4815	79.096	82.8575	74.2503	97.3498	69.5507	63.1656	105.53	97.8621	58.2686	75.1326	77.8643	80.1551	0.0424959	-0.288567	6.27853	0.0139371	0.173307
EEF2K	11.5891	8.88587	16.202	14.6546	7.39771	3.99124	15.1013	8.27058	18.3076	13.4418	9.82388	11.1532	13.7953	12.2832	6.84351	15.468	9.35534	12.8909	11.2525	20.7971	15.4238	13.5502	10.957	9.58885	16.8544	20.4758	15.0856	15.6056	9.88835	18.6235	15.6649	23.0372	20.0268	10.794	0.0395113	-0.416937	3.96891	0.0139419	0.173307
CA5B	17.2271	9.85776	10.7098	9.01819	10.3568	14.1229	10.842	7.39999	9.92734	5.79033	6.18541	13.0121	14.0731	8.11569	5.47481	9.99761	10.2189	15.5488	10.4487	15.6812	9.98661	13.3186	12.8403	14.1374	13.0583	21.1942	12.8326	7.05969	22.0462	14.709	6.52704	12.4348	13.458	11.5935	0.0260715	-0.405415	3.79575	0.0139875	0.173675
WDR49	12.059	7.35861	8.92486	7.01414	5.36334	7.82897	12.1972	3.69999	5.67277	5.79033	4.18425	16.066	17.1284	4.31374	2.32679	8.96012	7.19641	11.9606	9.84591	9.00837	9.20987	16.0981	15.5795	15.4897	12.451	3.35276	12.8326	8.73172	18.642	20.8772	5.22163	10.0788	9.61288	7.79563	0.0891883	-0.537378	3.57416	0.0139965	0.173675
OXCT2	1.40949	0.971892	1.78497	2.88081	0.924714	0.614037	2.71049	1.74117	0.773559	0.413595	0.181924	1.06221	0.92586	0.365572	0.410611	1.69771	1.58321	1.46185	1.40656	2.3355	7.6564	0.694881	2.73925	3.07335	2.27762	6.82526	3.42855	2.22938	1.13473	0.948966	1.18673	1.17804	1.76236	0.599664	0.0588833	-0.9435	1.94495	0.0140437	0.174107
NAT8B	0.31322	0	0	0.50101	5.54829	1.84211	0.193607	0	0.128927	1.24078	1.45539	0.39833	0.370344	0.219343	1.64244	1.41476	2.30285	0.132896	0.200937	0.222429	0	0.694881	0.856017	0.245868	0.151841	0.239483	0	0	0.486312	0	0.237347	0.523572	0.160215	0.399776	0.126897	1.55135	1.423	0.0140778	0.174375
SFT2D1	132.649	150.643	134.422	111.851	149.064	202.018	140.365	146.694	126.09	159.234	191.384	123.217	143.693	156.83	148.778	102.523	148.534	131.966	107.501	120.334	88.5479	167.235	124.122	113.96	91.8638	124.531	105.893	136.363	130.332	109.961	149.172	104.845	97.8912	115.935	0.0438631	0.276102	7.08292	0.0141321	0.174892
TAGAP	574.758	674.215	571.191	535.58	543.547	598.226	640.838	503.199	544.328	1036.68	431.887	503.755	448.116	382.388	701.597	338.127	341.254	797.375	668.718	168.045	402.127	497.535	443.074	656.099	880.982	252.056	137.73	281.644	177.342	184.93	259.42	190.711	273.807	200.088	0.187661	0.530901	8.88207	0.0141904	0.175148
ATP6V0E1	642.257	1021.18	390.222	521.426	611.236	1064.59	833.864	687.546	587.905	887.057	875.599	905.139	895.399	550.77	813.967	561.281	719.21	537.697	769.388	506.026	378.382	635.932	1001.54	410.968	499.253	522.911	487.932	613.264	747.462	567.837	669.793	441.371	495.544	590.869	0.0749708	0.336249	9.38472	0.0141883	0.175148
PHKA2	7.51727	5.55367	19.4974	8.39192	7.58266	8.44301	8.32509	9.7941	5.80169	7.23791	10.1877	5.97495	6.94395	8.62749	11.634	14.2419	9.64319	9.30271	10.4487	20.4635	11.3182	8.68602	6.50573	11.187	13.8175	11.3754	13.8122	14.1194	8.10521	11.3876	11.3926	17.9323	16.9828	13.3925	0.039524	-0.444865	3.69402	0.0141706	0.175148
HIST1H3J	0.469829	0.555367	2.33419	2.25455	0.924714	7.36845	2.51689	9.57646	2.32068	6.41072	18.0104	5.7094	0.92586	4.02129	6.98038	1.32044	11.2264	0.531583	0.200937	2.22429	0.998661	0.463254	1.71203	1.22934	5.01075	1.67638	1.56734	3.34406	5.67365	1.89793	4.15357	4.84304	1.28172	3.3981	0.364835	0.997207	2.50907	0.0143645	0.175439
CEACAM3	12.5288	5.13714	7.13989	18.2869	9.24714	91.1845	8.32509	4.35294	11.6034	14.5792	8.00464	17.261	5.9255	36.9958	29.8377	10.6578	20.8696	5.58163	1.80843	8.22987	14.5361	4.51673	7.19054	3.81095	5.31444	11.4952	4.60406	5.945	16.2104	4.50759	8.78183	40.7077	5.92794	16.1909	0.448639	0.888021	4.01978	0.0143776	0.175439
CHCHD4	10.023	5.41482	2.88342	5.13536	7.58266	12.1272	7.74427	3.48235	5.02813	6.82431	6.73118	9.6927	5.64774	5.48357	5.47481	6.41356	11.8021	5.71452	3.01406	6.56165	4.10561	6.71719	4.9649	2.21281	5.46628	3.71198	2.15509	3.90141	6.48417	4.74483	5.45898	6.28287	2.88386	5.79675	0.00641822	0.52691	2.98199	0.0143783	0.175439
SLC25A19	11.4325	5.69251	5.62952	12.4	13.3159	13.8158	10.6484	29.1647	9.92734	14.786	16.9189	13.9416	11.3881	13.8186	16.5613	7.26241	13.5293	11.9606	6.02811	9.67566	7.87833	9.95996	7.01934	6.39257	10.9326	10.657	5.77956	10.7753	5.34944	9.96414	16.4956	9.03162	7.85052	11.1937	0.0545952	0.469872	3.72845	0.0144664	0.175439
FAM96B	40.4053	35.1269	35.5621	31.1879	50.4894	53.5747	42.9807	76.8293	44.4796	61.0052	61.1264	36.6464	34.442	56.298	66.6558	33.6712	64.9117	41.0648	35.5659	33.1419	29.9598	39.2608	33.8983	29.6271	29.9127	24.1878	32.0325	52.0188	32.4208	32.1462	60.7608	34.1631	45.501	49.972	0.0651937	0.363079	5.51028	0.0144743	0.175439
PCGF5	43.5375	34.9881	45.4481	33.3172	30.5156	89.3424	33.494	53.3235	50.0235	41.4629	48.0279	33.1942	31.2015	66.3878	52.695	42.9143	48.072	31.2305	38.7808	34.6989	30.4037	31.3855	38.3496	32.3316	25.2056	47.5373	29.9754	41.0577	41.4987	32.0276	51.2669	42.5402	28.9989	27.5846	0.0576951	0.350327	5.43252	0.0144721	0.175439
ORC3	14.2515	14.1618	12.0829	11.398	14.9804	20.2632	14.7141	13.0588	16.5026	20.5763	14.0081	15.4021	13.2398	20.1064	16.835	15.185	11.5143	9.96719	11.2525	10.1205	9.4318	14.0134	15.5795	11.4329	9.41415	11.2557	13.4203	11.89	11.8336	12.0993	13.2914	12.9584	12.3365	10.5941	0.00454053	0.346696	3.97197	0.0143198	0.175439
CLIP4	80.1842	79.1397	102.43	69.5152	78.9706	175.922	94.0929	98.594	71.4253	73.8266	61.4902	123.35	95.5487	89.9306	79.5216	97.3352	66.6388	59.4044	61.2858	60.5007	57.7004	64.8556	80.808	71.5476	107.048	66.0972	69.8445	59.2642	111.69	82.9159	52.4536	74.8708	76.7428	49.1725	0.0643016	0.336782	6.38429	0.0143156	0.175439
RABEP1	39.7789	47.2062	41.0543	39.9556	47.9002	42.5221	37.9469	36.1294	40.6119	37.0167	43.2978	45.0113	34.9975	71.8714	55.8431	41.6881	32.9596	38.8056	43.2015	32.141	27.8515	29.7641	32.1862	31.594	37.3529	33.1684	34.1876	35.2984	36.7976	32.7393	46.9947	47.1215	28.6784	25.3858	0.0347562	0.298268	5.37872	0.0143251	0.175439
PCNXL4	25.9972	26.6576	31.443	28.0566	19.9738	24.408	28.6538	21.9823	23.5936	22.0239	23.832	33.8581	28.2387	27.2716	22.173	28.861	13.961	33.224	29.1359	44.0409	21.5267	31.6171	27.9061	23.1116	46.6152	39.5147	30.5631	26.5667	28.6924	36.4166	26.8202	29.5818	26.9161	27.5846	0.029928	-0.310418	4.93737	0.0144082	0.175439
FBXL17	19.4196	34.2939	25.6761	12.0242	19.2341	18.1141	16.6502	18.9353	28.2349	19.6457	18.3743	18.8543	21.5725	18.0592	19.7093	22.8247	11.6582	22.7252	38.178	21.0195	27.2967	26.9846	23.6261	22.9887	18.6765	24.547	26.2529	25.8236	33.3935	26.8083	19.9371	25.5241	23.2311	19.3891	0.0270969	-0.32291	4.63889	0.0144776	0.175439
IL13RA1	149.562	191.74	171.769	76.1536	117.254	118.816	159.532	196.97	203.188	175.778	126.437	169.821	163.136	135.846	134.543	232.209	133.853	158.943	186.269	158.147	108.41	197.694	272.727	205.669	207.263	166.68	263.901	174.449	152.864	208.061	194.268	243.068	229.588	183.297	0.0688972	-0.331597	7.49148	0.0143668	0.175439
PCCA	8.61354	12.3569	18.5362	12.6505	11.6514	15.1974	13.7461	13.7117	11.4745	11.7874	10.5516	12.2155	12.0362	11.5521	7.8016	17.1657	13.3853	15.283	16.075	19.7962	13.0936	21.6571	15.7507	12.6622	15.7915	15.9256	16.4571	13.562	17.6694	13.5228	12.9354	18.8486	16.0215	14.1921	0.0061246	-0.338084	4.03833	0.0144261	0.175439
TMEM159	8.45693	12.9123	10.4352	7.3899	7.58266	7.21494	8.32509	18.5	11.6034	10.2365	12.7347	8.89604	11.0177	11.2596	7.66473	8.77149	9.35534	10.4988	13.0609	15.014	9.76468	12.9711	17.2915	10.8182	9.2623	12.0939	12.3428	15.6056	11.9957	14.709	16.1396	10.7332	16.6623	14.1921	0.00837126	-0.381325	3.78739	0.0143068	0.175439
BACE1	10.9627	6.94208	9.19947	8.64243	10.9116	3.3772	12.0036	13.9294	10.8298	9.30588	8.73234	10.8877	6.85136	6.72652	4.10611	9.90329	8.34784	10.1001	8.03748	10.1205	11.4291	13.8976	10.101	11.5558	19.132	11.7347	12.2448	12.6331	8.75362	13.0483	9.61254	11.9113	12.657	12.3931	0.00974595	-0.402654	3.64118	0.0144593	0.175439
MPZL3	7.04744	13.6065	8.23833	7.1394	6.10311	11.6667	12.9717	2.39411	9.02486	6.92771	6.36733	10.3566	9.35118	9.94355	6.84351	10.4692	7.48427	10.233	19.6918	12.0112	9.98661	11.0023	14.2099	11.6787	13.8175	8.14241	11.5591	7.61703	11.3473	12.6924	9.73122	9.29341	13.7785	6.99608	0.0137612	-0.416471	3.60049	0.0143427	0.175439
ERP27	6.10778	14.023	5.76683	9.89495	5.73323	5.06581	8.90591	2.17647	5.93062	7.34131	3.63847	7.43549	6.66619	6.28783	5.88542	6.22493	6.33284	7.30927	8.84123	11.7887	6.65774	12.9711	9.24498	11.0641	8.80678	8.26216	10.7755	4.08719	12.482	13.0483	4.39091	7.85358	11.6957	6.79619	0.0185218	-0.465881	3.32814	0.0143519	0.175439
MAP3K12	7.20405	2.77683	9.33677	6.13738	6.10311	7.82897	6.58263	5.22352	2.57853	7.34131	4.91194	7.70105	5.18481	6.1416	3.42176	5.56471	6.90856	10.3659	3.8178	13.3457	8.5441	4.2851	8.38896	6.76137	8.80678	5.62785	8.13057	7.43125	6.80837	8.77793	9.25652	6.41376	10.5742	12.3931	0.00701814	-0.473459	3.20133	0.0142332	0.175439
MGAM	3.28881	3.60988	6.17875	0.876768	1.47954	0.307019	1.35525	0.65294	1.41819	0.930588	0.363847	1.59332	2.77758	0	0.958092	2.45224	3.16642	3.0566	5.22436	5.00465	1.7754	5.32742	3.25286	2.82748	1.36657	2.63431	3.82039	1.11469	1.94525	5.21931	1.18673	2.22518	3.52472	4.9972	0.0144651	-0.767972	2.19571	0.0143326	0.175439
CXCL1	10.023	23.4642	11.259	6.76364	5.73323	2.30264	11.6164	7.39999	3.60994	2.99856	5.09386	7.30272	11.0177	2.70523	2.18992	0.660219	3.16642	13.5554	35.5659	2.00186	17.0882	23.3943	14.3811	27.5372	30.8237	5.5081	9.40403	10.0322	3.56629	5.10069	5.69632	1.57072	6.24837	4.19765	0.410873	-0.876989	3.5722	0.0144378	0.175439
SMAD6	1.40949	0.138842	0.686527	2.00404	1.47954	0.153509	1.35525	1.52353	0.515706	0.103399	2.36501	1.59332	0.740688	0.292457	0	0	0.143928	1.86054	2.81312	0.778501	3.43983	0.810695	3.76647	4.67149	0	5.74759	1.07755	0.928906	6.48417	0.948966	0.118673	0.130893	0	0.99944	0.207164	-1.14804	1.79875	0.0143816	0.175439
PDK2	14.2515	21.1039	21.557	29.5596	22.1931	16.1185	30.7835	16.5412	28.6217	25.0225	20.1935	22.572	21.4799	35.0949	16.4244	19.052	21.8771	17.1436	21.9021	35.255	35.0641	23.3943	22.0852	24.9556	25.2056	33.5276	30.9549	37.342	30.9619	27.4014	33.5846	24.7388	28.358	26.3852	0.0358696	-0.334431	4.79133	0.0145228	0.175697
SGMS2	30.8521	25.6857	18.9482	32.3152	32.1801	21.6448	47.8209	5.65882	23.2068	17.371	24.1959	52.1812	42.9599	14.7691	12.8658	20.8441	17.991	40.799	27.7293	43.5961	30.6256	40.0715	34.4119	24.7097	36.1382	45.2622	35.3631	31.0255	38.7429	65.1228	22.0732	23.9534	30.7612	27.1848	0.107245	-0.452275	5.03969	0.0145241	0.175697
CAMTA2	87.2317	75.8075	130.303	119.867	75.6416	83.6626	105.128	113.176	55.8252	66.0717	74.7707	89.8898	84.1606	81.9611	77.3317	112.237	97.5834	90.635	104.286	124.671	148.8	93.2299	85.2593	118.017	105.681	109.563	104.032	81.9295	139.085	100.946	84.7328	140.186	130.094	115.735	0.0538947	-0.306517	6.69424	0.0145384	0.175719
SNORA7B	35.3938	162.028	41.7409	30.0606	55.113	63.8599	50.1442	77.9175	53.7624	71.2417	124.618	28.0159	39.5342	78.5248	82.5328	71.681	106.795	35.4832	70.9308	41.8166	51.1536	28.8376	38.5208	53.8451	51.4741	31.7315	55.5426	77.6566	38.905	40.8055	56.9632	51.441	59.7601	50.7716	0.137023	0.476676	5.95214	0.0145845	0.176123
ITGB2-AS1	12.3722	12.2181	21.9689	20.0404	19.9738	27.7852	13.5525	15.2353	3.8678	9.82287	13.8262	32.2647	17.4062	11.6983	17.7931	15.8453	7.19641	6.5119	6.22905	15.2364	10.8743	14.2451	11.9842	10.4494	7.44021	7.78319	9.59995	6.31656	23.6672	12.5738	5.3403	13.2202	18.1043	8.19541	0.104391	0.51944	3.97368	0.0146156	0.176137
C8orf33	16.444	15.2726	13.5932	16.2828	10.7267	12.4343	13.7461	10.2294	18.5654	11.1671	11.6431	16.066	20.2763	12.4294	9.58092	14.1476	12.8096	17.2765	23.1078	14.4579	19.6403	18.0669	15.0659	16.1044	12.6028	24.068	16.555	15.6056	17.3451	19.691	13.4101	18.9795	18.2645	13.3925	0.00925006	-0.328858	4.15049	0.0146235	0.176137
SETD1B	62.8005	44.1516	75.1061	95.693	55.113	33.6185	48.0145	37.4352	41.1276	40.1187	31.2909	59.2184	70.9209	39.2624	59.1279	79.9809	42.8906	57.0123	66.912	68.6193	108.077	56.517	66.0845	93.5528	52.6888	95.4339	63.967	49.0463	82.9973	62.869	47.4694	75.7871	72.0966	54.1697	0.0752482	-0.367159	6.00451	0.0146044	0.176137
SAP30BP	236.168	347.104	244.266	215.059	257.81	203.707	358.56	316.894	272.293	253.43	243.778	200.36	232.761	229.433	286.88	273.237	167.389	227.916	197.119	163.374	221.148	175.342	183.016	237.017	335.265	157.22	272.423	207.703	140.058	174.135	176.349	187.177	258.266	144.319	0.0620382	0.31202	7.87084	0.01465	0.176305
EFCAB4B	5.01151	4.9983	10.1606	6.13738	1.84943	2.14913	4.64656	2.39411	4.3835	2.89516	1.27347	5.31107	5.18481	4.38686	6.4329	7.734	6.47677	4.51846	7.43467	11.1214	8.76602	3.93766	4.62249	7.13017	6.07364	6.945	7.24894	5.57344	5.34944	7.82897	5.3403	8.24626	8.97202	6.99608	0.00745498	-0.513378	2.98424	0.0146627	0.176306
ACE	1.25288	0	0.823833	1.00202	2.03437	2.60966	0.774427	1.30588	0.38678	2.48157	1.63731	1.59332	0.46293	1.60851	0.27374	0.0943171	1.0075	0	0	0.333643	0.332887	0.347441	0	0.245868	0.455523	0.718448	0.489793	0.557344	1.13473	0.118621	0.71204	0	0.160215	0.399776	0.00165822	1.39065	1.47388	0.014692	0.176507
CYB5A	5.48134	1.6661	8.78755	7.3899	13.8707	11.3597	4.84017	15.6706	5.93062	15.7166	19.4658	6.50606	4.81447	15.354	18.7512	5.18744	20.7257	5.98031	3.21499	8.4523	5.65908	5.0958	3.42407	3.56509	6.22548	6.82526	8.03261	13.0047	4.0526	4.86345	14.5968	6.67554	9.93331	5.39698	0.161497	0.636363	3.44346	0.0147516	0.17707
MGAT5	11.4325	17.6329	23.2046	10.5212	15.5352	8.90354	12.3908	8.05293	13.4084	6.51412	10.5516	9.95825	9.07343	7.01897	8.34909	14.4305	6.6207	15.8146	17.8834	13.5682	15.9786	17.0246	13.6963	15.9814	12.451	18.5599	16.2611	9.10328	13.7789	19.8097	9.49387	20.2884	11.0548	12.1932	0.0311726	-0.39467	3.93596	0.0147768	0.17722
CD97	694.251	575.915	514.346	482.222	547.616	616.954	550.424	590.04	665.519	515.856	798.099	603.868	493.298	840.815	590.321	622.021	820.535	564.409	381.78	426.174	454.502	334.585	463.619	357.738	685.259	579.189	410.839	678.659	454.216	527.981	556.934	590.066	482.567	565.084	0.0572087	0.293191	9.15263	0.0148752	0.178248
ACADM	16.444	18.4659	12.3575	11.1475	23.4877	23.4869	19.3607	14.5823	22.3043	20.6797	26.9247	15.0038	15.5544	25.8094	22.7205	13.393	10.3628	16.8778	18.2853	11.0102	8.87699	18.9934	10.6146	14.7521	13.362	14.1295	11.1673	22.2938	9.23994	13.76	21.5986	10.2097	11.3752	8.59519	0.0432762	0.392861	4.19426	0.0149219	0.178272
MMGT1	77.052	78.7232	53.8237	59.996	54.928	54.4958	66.6007	70.2999	96.6949	45.8056	62.5818	61.6084	64.9954	63.2439	43.9353	58.0993	43.7542	78.8072	112.123	50.1577	78.7833	94.0406	77.7263	74.7439	55.1183	89.5666	79.3465	78.3997	76.8374	78.2897	66.8131	57.2003	78.8256	59.7665	0.0455677	-0.296186	6.163	0.0149411	0.178272
SPECC1L	9.23998	16.3833	16.3394	12.2748	13.8707	10.4386	14.1333	7.18234	11.8612	9.20248	12.5527	13.4104	16.11	15.4271	14.782	16.5055	9.93105	15.6817	15.6731	17.7943	16.8663	15.8665	12.669	14.2603	20.1949	15.8059	18.0244	20.8075	11.0231	17.7931	17.089	18.5868	15.8613	12.1932	0.00989774	-0.340517	4.07057	0.0149199	0.178272
QPCT	58.2588	143.146	77.5776	56.4889	51.784	52.0397	77.4427	123.188	71.941	82.5121	72.4056	97.4581	94.6229	46.6469	92.3874	77.057	80.8877	78.5414	134.427	84.523	75.8982	123.689	156.309	101.175	56.6367	64.1814	100.212	107.196	144.759	75.68	102.652	76.0489	130.415	140.521	0.0888565	-0.38176	6.56257	0.0149316	0.178272
CCDC170	2.66237	7.91397	4.11916	4.38384	6.65794	3.68422	9.87394	2.39411	6.83311	5.06653	5.27579	5.97495	4.25895	6.28783	5.33794	9.14875	7.34034	5.71452	8.23842	4.44858	9.32084	8.91764	7.19054	13.7686	6.83285	5.38836	11.1673	10.0322	10.0505	5.45655	6.76438	7.5918	9.13224	5.59687	0.00731374	-0.483794	3.1628	0.0149303	0.178272
HCST	137.503	165.777	83.3444	83.9192	180.134	118.049	189.735	242.023	161.158	163.577	206.847	155.747	127.676	103.311	128.247	105.352	131.119	146.318	142.464	70.51	84.9971	147.431	169.834	106.707	90.3454	75.7963	92.9628	136.735	123.361	123.366	124.251	72.6456	105.742	112.737	0.0790725	0.355456	7.05451	0.0150017	0.178843
L1TD1	6.421	1.11073	5.49222	0.876768	1.10966	8.75003	0.968034	2.39411	3.99672	5.79033	15.0997	5.84217	2.03689	8.77372	3.6955	1.22612	9.21141	3.72108	1.20562	5.22708	0.998661	0.463254	1.54083	0.368802	1.36657	4.78966	1.27346	6.68813	3.40419	3.67724	2.01745	3.7959	1.1215	1.99888	0.258707	0.881335	2.53366	0.0150433	0.178881
COX7B	265.297	257.135	233.282	214.432	247.638	581.8	224.971	453.141	247.797	244.745	349.839	403.11	309.885	352.777	383.374	225.04	338.951	238.149	202.545	186.173	238.569	311.191	259.373	190.425	183.88	178.055	201.697	304.681	348.038	179.948	353.409	229.455	284.862	256.256	0.080045	0.348804	8.14952	0.0150311	0.178881
MFSD6	14.0949	5.13714	23.8912	12.901	7.02783	4.29826	9.68034	15.8882	14.6976	15.6132	12.5527	7.83382	7.31429	13.5261	11.9077	18.6748	12.3778	15.8146	10.4487	18.2392	19.3074	11.6972	8.56017	15.2438	20.1949	28.259	17.3387	25.2663	7.781	10.0828	17.9197	15.1836	29.9601	18.5896	0.0960941	-0.492266	4.07737	0.0150425	0.178881
TTLL4	17.0705	28.7402	41.8782	37.8263	18.3093	25.4825	35.2364	18.0647	18.0497	21.3001	14.7358	25.7587	30.5534	20.8376	16.0138	44.612	26.051	31.0976	36.5705	54.7175	31.6243	22.9311	22.5988	45.7314	50.8668	29.0972	42.71	20.0644	30.4756	32.9766	23.616	32.0688	40.5343	30.1831	0.0787798	-0.404348	5.01765	0.0151183	0.17962
UBA7	113.072	143.562	85.404	137.527	141.111	121.733	133.201	79.0058	56.3409	92.4384	104.97	136.76	119.899	72.2369	118.256	173.355	112.84	73.4914	94.2395	89.194	90.5453	79.1006	128.06	107.813	88.6752	79.1491	88.1628	54.8055	100.018	110.199	70.2546	112.568	96.9299	68.3617	0.0650124	0.329631	6.71794	0.015163	0.179997
TSG101	84.4127	114.683	66.1812	56.1132	67.5041	124.496	78.9916	92.0646	70.6517	92.1282	54.759	88.5621	100.826	66.534	70.0776	75.1707	83.7663	72.694	73.9448	56.0521	46.0494	89.7555	78.2399	66.7532	62.2548	67.8934	50.6446	53.1334	75.0542	68.0883	58.2686	62.3051	56.716	79.1557	0.0481268	0.299442	6.25548	0.015177	0.180011
ADCY3	3.44542	4.02641	5.62952	14.2788	17.9395	0.614037	8.13148	32.8647	3.99672	5.27333	1.81924	5.84217	5.18481	3.50949	12.1815	8.8658	1.43928	3.98688	9.2431	3.22522	4.43849	4.40091	2.05444	8.60538	6.52917	4.07121	3.13468	1.48625	6.32206	2.8469	5.45898	4.97394	2.40322	1.19933	0.311934	0.832814	3.04368	0.0151979	0.180063
OSTC	79.088	96.0784	74.8315	69.0142	54.0033	111.448	76.8619	87.2764	113.069	75.481	74.7707	112.462	117.677	87.8103	62.0022	61.9663	72.5398	97.8113	109.913	82.1875	94.318	154.148	118.302	72.4081	62.8622	109.084	106.775	110.354	148.974	99.6414	110.96	76.0489	104.46	100.744	0.057895	-0.315372	6.59582	0.0152071	0.180063
GZMH	0.626439	0.277683	0.549222	0.250505	0.184943	0.460528	1.93607	15.2353	2.32068	4.23935	5.45771	1.85887	0.833274	1.46229	1.64244	0	0.575713	1.19606	0.200937	0.111214	0	0	0	0.737604	4.55523	0.718448	0	0.371563	0.324208	0.118621	3.79755	0	0.160215	0	0.872313	1.46109	1.81463	0.0153511	0.181306
PTPN7	13.3118	8.74702	10.2979	13.402	7.39771	8.75003	4.64656	52.2352	9.92734	13.3384	8.55042	5.97495	8.42532	5.26423	13.9608	7.07378	14.6807	7.17638	4.62155	10.7878	9.4318	3.82185	5.64971	8.60538	12.451	7.42397	9.40403	5.57344	4.0526	6.64276	5.3403	7.72269	5.4473	14.9916	0.184755	0.649359	3.58507	0.0153286	0.181306
RAP1B	259.816	352.936	370.999	170.344	262.064	445.484	223.035	310.147	250.504	185.704	284.165	248.027	247.297	315.561	253.073	188.257	194.591	223.265	293.368	167.267	180.203	259.77	238.144	205.669	204.682	235.292	165.648	266.596	274.28	206.044	214.205	192.413	157.811	168.706	0.0621835	0.3095	7.94222	0.0153406	0.181306
NRIP1	437.098	291.567	282.163	230.339	372.66	607.743	240.072	163.67	173.922	299.649	96.9653	519.688	316.829	143.743	265.802	284.932	411.059	355.895	179.839	130.566	283.842	221.32	365.862	191.531	119.195	113.156	139.101	94.1911	405.909	259.186	82.9527	191.366	118.078	301.831	0.186117	0.52464	8.01772	0.0154272	0.182052
HAUS8	16.6006	12.2181	12.9067	10.396	9.43209	12.5878	10.6484	23.5059	13.2794	11.4773	7.09503	6.2405	8.14757	14.0379	9.58092	10.1862	9.35534	14.2199	7.83654	6.11679	11.2072	9.03346	8.90257	8.72831	11.5399	7.78319	7.83669	10.9611	7.45679	5.69379	6.17102	9.4243	8.01073	4.79731	0.024523	0.42251	3.61294	0.0154493	0.182158
PACS1	59.5117	52.3433	71.5362	55.4869	50.1195	43.2896	44.9168	62.6823	76.8402	39.0847	59.1252	45.4096	57.7736	52.1305	42.7035	51.4028	55.7002	63.6571	71.3326	52.7157	85.33	59.4123	68.6525	70.6871	47.6781	98.9064	53.5834	70.0395	64.8417	61.92	58.15	65.7083	57.5171	58.3673	0.0371817	-0.279521	5.96269	0.0155357	0.183023
ZBTB8OS	60.2948	64.7002	60.5517	51.6041	66.0246	101.47	48.2081	59.4176	65.3657	78.3762	63.1275	84.7115	55.2738	54.5433	71.1725	53.2891	71.5324	52.361	49.6314	40.2596	53.04	59.1807	69.851	39.4618	38.8713	51.3691	51.9181	54.0623	76.3511	45.3131	60.2861	50.3938	47.744	61.9653	0.0397877	0.286119	5.95016	0.015555	0.183096
TKTL1	7.20405	6.6644	1.37305	1.37778	7.7676	2.91668	5.22738	30.0353	3.60994	1.86118	1.63731	1.59332	2.12948	0.877372	0.547481	1.69771	0.287857	5.05004	1.20562	0.111214	1.7754	3.93766	0.51361	2.58161	6.37732	2.15535	0.881628	3.71563	1.13473	0.118621	0.593367	0.654465	1.60215	0.399776	0.591226	1.15887	2.39913	0.0156104	0.183285
COX10	42.128	52.2045	20.0466	42.7111	47.9002	66.316	64.2774	35.0411	47.445	40.7391	46.0267	52.7123	41.9414	36.3378	44.8934	31.3133	31.6642	40.9319	37.9771	33.9204	39.6135	41.6929	39.7192	31.717	39.9342	37.4791	30.9549	31.7686	29.1787	42.1104	30.2617	31.1525	27.8774	29.5834	0.0376819	0.304098	5.38523	0.0156045	0.183285
TTC7A	68.1253	49.1499	80.1864	68.8889	71.203	42.2151	56.146	70.5176	54.6648	53.5605	57.8517	48.3307	56.6626	38.385	61.4547	85.6399	69.2295	71.2322	75.9542	75.5146	77.2298	49.1049	64.5437	89.2501	63.9251	87.531	71.9017	86.3883	57.2228	76.9849	60.4047	72.9074	96.6094	79.5554	0.0458661	-0.29592	6.13407	0.0156028	0.183285
SPARC	3.1322	4.30409	14.4171	3.88283	3.69886	20.2632	11.0356	8.92352	8.767	3.72235	2.91078	6.10773	9.9067	6.21472	3.96924	6.22493	11.946	11.6948	7.43467	19.3513	12.0949	9.49671	24.9957	8.97418	13.9694	10.0583	8.71832	6.87391	5.02523	17.3186	9.01918	11.7804	9.93331	6.59631	0.125467	-0.585647	3.53962	0.0156298	0.183358
CYSTM1	16.6006	16.7998	5.0803	18.0364	17.9395	17.8071	11.81	31.1235	18.0497	11.3739	20.7393	11.6843	12.1288	12.4294	12.8658	10.0919	12.8096	15.6817	12.659	4.22615	13.3155	13.0869	7.87535	11.5558	11.5399	10.7767	5.58364	15.9772	16.8588	8.06621	9.96856	4.71215	6.72902	16.9905	0.0659469	0.455672	3.92334	0.0157325	0.184408
TMEM185A	5.48134	4.58177	4.943	5.38586	3.51391	1.53509	4.64656	1.95882	3.8678	4.13595	3.8204	4.11608	4.35154	4.82554	3.28489	5.28176	5.32535	6.77769	5.22436	7.11772	4.66042	5.21161	4.10888	6.5155	7.89573	3.23302	6.07344	6.68813	4.53892	10.0828	6.05234	6.15197	7.20966	5.59687	0.00165822	-0.536841	2.85083	0.015762	0.184599
ACOT13	10.4929	11.1073	14.4171	18.0364	16.09	27.3247	7.16345	25.247	25.1407	22.6443	32.3824	19.2526	10.8326	30.6349	29.2902	10.3749	26.051	11.2961	7.63561	15.6812	11.762	14.7083	11.6418	8.60538	10.3252	17.9612	10.1877	24.7089	13.2925	7.59173	27.8882	8.76983	13.7785	19.1893	0.11287	0.501011	4.25297	0.015804	0.184782
EIF3D	129.36	140.647	140.052	102.707	113.74	87.5003	107.452	149.523	161.287	120.976	102.059	114.055	125.269	116.69	110.317	130.158	132.558	129.308	192.498	136.46	119.395	149.515	154.254	125.024	129.065	125.13	154.775	153.084	134.06	174.017	135.406	139.401	166.623	148.917	0.0381012	-0.25561	7.10417	0.0157979	0.184782
SKIL	96.9415	76.9183	108.059	73.899	88.5876	62.3248	81.1212	390.023	127.25	51.9061	60.9444	60.1478	69.8098	67.8501	74.7312	71.4923	47.6403	75.8835	65.3045	41.2606	75.4544	77.3634	78.0687	78.9236	52.8407	132.793	60.2446	55.9202	67.5974	51.2442	37.7381	78.4049	39.7332	40.9771	0.178968	0.52469	6.36962	0.0158442	0.184918
GALK2	7.04744	5.97019	6.31605	6.01212	13.3159	9.21056	7.16345	7.61764	6.96203	14.0622	5.45771	7.03716	4.35154	8.55437	11.7708	9.24307	11.8021	5.84742	6.22905	7.45137	1.99732	7.87532	3.76647	4.54856	6.52917	3.4725	4.79997	4.27297	4.37681	5.45655	7.23908	7.72269	8.33116	9.9944	0.0190938	0.484738	3.20643	0.0158581	0.184918
KIAA0146	49.9585	62.3399	78.8133	51.3536	44.3863	50.9651	61.3733	44.6176	46.1557	57.0761	34.0197	60.4134	56.8478	41.3096	41.3348	74.7934	57.1395	55.6834	53.8511	72.8455	58.1443	59.4123	69.5086	68.3513	67.7211	48.615	78.4649	48.1173	70.3532	74.2566	51.9789	77.7505	77.2235	76.9569	0.0436108	-0.294336	5.961	0.0158801	0.184918
TDRD9	18.0101	24.9915	28.5595	19.7899	21.8233	14.7369	20.3287	12.4059	11.7323	13.6486	8.00464	22.7048	18.4246	7.45766	6.29603	30.8417	18.2789	23.1239	27.1265	27.0251	17.8649	39.3766	28.0774	25.5703	22.928	14.2492	24.0978	11.1469	29.0166	24.6731	10.3246	16.2307	30.2806	33.1814	0.0935014	-0.449861	4.5184	0.0158818	0.184918
PRDX2	11.9023	15.5503	16.202	30.5616	15.9051	11.2062	13.7461	20.8941	27.4613	34.225	46.2086	23.1031	31.3866	24.932	7.39099	22.0702	40.5878	14.4856	21.2993	28.026	40.3903	23.7418	23.7973	18.0713	17.7654	32.2104	38.7916	73.012	28.8545	38.3145	58.7433	14.2673	40.5343	61.1657	0.179514	-0.555752	4.95056	0.0158767	0.184918
FOXO1	39.1525	20.9651	20.0466	21.5434	19.6039	17.6536	29.4282	47.8823	25.7853	14.8894	25.1055	15.2693	19.8134	32.9746	9.58092	16.8828	11.0825	56.4807	24.7153	26.5803	41.0561	26.8687	19.346	34.0527	56.4849	42.8674	25.7631	41.2434	23.9914	33.0952	17.3263	23.9534	18.5849	18.7895	0.112382	-0.46405	4.8748	0.0158991	0.184965
DYNLT3	43.5375	58.73	60.5517	33.3172	31.4403	49.8905	40.2702	42.4411	54.5359	47.8736	47.4821	45.5424	46.2004	42.187	36.2706	32.8223	37.7092	40.2674	40.1874	25.8018	44.4959	41.5771	43.3144	24.4639	41.9081	45.9807	30.759	32.5117	35.3387	34.2814	42.6037	26.0477	28.1978	30.383	0.0338886	0.291467	5.40643	0.0159435	0.185326
PLEKHG3	15.661	21.937	13.8679	12.6505	14.9804	3.68422	18.3926	4.13529	14.6976	9.20248	10.0058	14.7382	20.1837	7.96946	16.2876	16.5998	14.6807	19.4028	22.5049	15.4588	27.6296	14.9399	14.3811	21.0217	18.2209	14.9677	15.0856	18.9497	15.2378	25.029	10.5619	17.9323	22.4301	9.79451	0.052995	-0.411465	4.16067	0.0159648	0.18542
COMMD4	13.7817	16.1056	14.0052	16.7838	18.3093	17.193	19.9415	19.8059	20.4993	18.0948	31.4728	16.066	21.1096	18.4248	16.4244	10.4692	22.3089	10.1001	14.0656	12.2336	12.9826	15.9823	17.8051	11.4329	14.7286	14.6084	11.853	23.78	14.2652	12.9297	21.2425	7.98447	4.16558	16.1909	0.0371922	0.379909	4.19375	0.0160188	0.185893
C1D	18.1667	31.5171	12.0829	16.2828	18.1244	43.7502	15.8758	20.0235	19.2101	15.7166	26.5609	28.9453	26.7573	23.2503	15.4663	14.9021	15.4003	16.4791	14.0656	13.5682	14.5361	18.646	21.7428	11.4329	15.6396	20.356	16.2611	15.0483	26.423	11.8621	20.1745	10.995	12.1763	13.9922	0.052329	0.38869	4.38479	0.0160917	0.186584
HIST1H2AE	12.6854	22.2147	8.65025	17.9111	13.3159	61.0967	31.9451	22.2	25.2696	49.6314	55.6687	59.2184	24.2575	36.7034	39.2818	11.5067	44.6178	20.8646	18.6871	13.6794	15.8676	18.1827	17.2915	14.7521	23.9909	10.7767	16.8489	32.3259	40.3639	26.571	31.2111	23.8225	23.2311	14.9916	0.169816	0.547435	4.84739	0.016134	0.186919
ZNF862	4.22846	3.74872	8.51294	8.64243	3.8838	4.29826	5.6146	3.69999	1.67604	3.72235	4.36617	5.57662	4.53671	2.63212	4.24298	7.92263	6.76463	3.98688	4.82249	11.2327	7.21255	6.94881	7.01934	6.76137	5.76996	5.38836	8.62036	6.13078	6.48417	5.33793	4.15357	11.1259	8.65159	9.39474	0.00702484	-0.503956	3.0143	0.0161483	0.18693
THYN1	7.04744	13.0511	6.86527	8.39192	10.9116	17.0395	12.1972	8.05293	14.6976	11.4773	16.1912	17.7921	12.6843	12.7219	9.44405	5.94197	9.93105	6.379	9.44404	4.89344	6.54678	10.539	12.8403	4.54856	9.11046	8.14241	7.64078	10.7753	11.0231	8.65931	11.986	7.72269	6.24837	6.79619	0.0188126	0.422049	3.59219	0.0161957	0.187228
NACA	1.09627	0.555367	0.549222	0.50101	0.369886	0.307019	0.387214	0.65294	0.515706	1.03399	0	0.265553	0.648102	0.584914	0.13687	0.943171	0	1.86054	2.61218	0.778501	1.22059	1.50558	2.05444	1.47521	2.27762	0.478966	1.07755	0.371563	0.810521	2.01655	0.35602	0	3.20429	0.199888	0.00165822	-1.20533	1.55644	0.0162009	0.187228
BIN3	47.9226	47.7615	29.1088	34.0687	39.5778	29.9343	42.3999	62.247	40.9986	30.9162	24.0139	31.9992	31.2941	29.8306	29.0165	30.5587	32.096	44.1214	30.9443	24.0223	25.5213	26.9846	29.2758	30.2418	36.8974	32.0907	24.8815	32.1402	25.7746	24.3172	27.1762	29.5818	21.629	24.5862	0.0356918	0.309618	5.12164	0.0162488	0.187627
HDAC9	5.32473	1.52726	2.88342	4.38384	2.95909	1.22807	5.6146	2.61176	3.8678	4.34274	1.09154	4.91274	2.03689	3.36326	3.01115	1.41476	3.59821	2.52502	1.00469	9.67566	1.99732	5.79068	5.64971	3.31922	14.2731	5.86733	7.73873	5.945	2.91787	3.44	3.5602	7.06822	2.56343	4.39754	0.081965	-0.690203	2.64487	0.0162974	0.188033
ALAS1	15.3478	11.1073	20.3212	12.5253	21.8233	17.193	8.7123	56.5882	19.7258	29.055	27.4705	14.2071	11.1103	26.1018	39.5555	16.5998	45.1935	10.233	8.84123	16.0149	10.3195	12.7395	10.957	17.9484	20.3467	10.2978	9.11016	19.1355	10.2126	8.77793	37.3821	22.5136	14.5795	21.9877	0.174903	0.570338	4.43	0.0163417	0.188388
BACH1	145.96	136.62	147.466	109.095	138.152	194.036	84.4125	94.894	176.887	104.433	72.9514	75.8155	91.1046	98.8505	98.6834	87.9978	75.2745	156.551	107.702	68.2857	87.4383	89.5239	105.461	99.3307	110.996	96.8708	65.0446	72.8263	93.8583	84.5766	68.1185	70.944	42.9375	74.7581	0.0811133	0.359298	6.69543	0.0163665	0.188518
CD99	112.602	84.8323	73.733	82.9172	41.982	49.123	110.162	165.194	100.563	100.297	128.074	127.2	134.99	54.0315	57.4855	98.1841	118.453	124.523	120.361	80.8529	78.2284	62.8868	192.775	136.088	152.297	120.101	124.212	115.742	167.129	181.252	110.366	90.0544	133.138	162.709	0.105247	-0.402673	6.84302	0.016408	0.18884
PRKCI	18.0101	16.9387	14.9663	16.7838	18.8642	15.0439	18.9735	17.847	20.1125	14.3724	19.102	17.261	20.1837	15.9389	11.2234	16.0339	14.3928	23.3897	22.7059	18.0167	18.0869	22.9311	24.1397	21.1446	12.7546	28.6182	17.3387	19.6928	21.3977	27.7573	18.157	17.9323	16.0215	19.9888	0.0104156	-0.301723	4.38794	0.0164612	0.189297
FBXO33	24.901	27.9072	18.1243	30.3111	18.8642	15.3509	34.0748	26.9882	17.534	14.5792	18.1924	13.676	27.0351	12.5757	14.5082	27.4463	9.78712	40.1345	38.5799	14.013	43.0534	34.0492	32.871	34.7903	24.1427	28.8577	25.4693	23.0369	24.6398	18.7421	12.8167	20.9429	29.7999	17.79	0.0752864	-0.406625	4.71379	0.0165771	0.190357
SLC27A1	17.3837	9.44123	20.4585	17.7859	16.275	5.37283	13.1653	1.08823	16.6315	9.71947	11.0973	12.2155	13.425	6.79963	0.684351	1.60339	6.90856	17.4094	13.8647	24.8008	25.0775	21.1939	12.4978	23.1116	15.4878	24.7865	23.804	20.2502	17.6694	20.7586	4.62826	1.17804	2.08279	21.7878	0.271885	-0.698499	4.00051	0.0165806	0.190357
EGR3	158.959	32.7666	19.9093	123.875	259.475	21.0308	16.6502	47.0117	106.107	13.0282	16.3731	50.5879	19.9986	6.36094	20.8043	22.919	18.5667	29.1042	48.8277	3.89251	64.2472	22.1204	35.6103	46.7149	6.83285	80.4662	14.4979	13.9336	18.9662	33.2138	20.0558	9.81698	27.8774	18.1898	0.572882	0.927923	5.48289	0.0167028	0.191132
SRGAP2B	16.1308	20.2709	16.202	36.3232	27.9264	53.7283	29.8154	44.1823	10.3141	7.34131	21.8308	40.0986	26.6648	12.2101	33.6701	38.9529	10.075	9.4356	11.2525	16.2373	30.7366	14.5925	14.7235	14.1374	31.8866	20.2363	17.0448	16.7203	20.1009	21.2331	9.73122	23.0372	24.0322	5.39698	0.163934	0.54726	4.59623	0.0167023	0.191132
EHD4	110.097	73.0307	112.041	120.493	90.0672	80.5924	57.6948	301.005	134.599	107.431	59.1252	54.3057	62.6807	57.3947	87.0495	65.1731	118.165	76.4151	63.898	57.9427	106.302	53.1584	52.7306	110.026	72.8837	91.2429	58.1874	84.902	39.8776	64.7669	56.9632	55.6295	47.5838	119.533	0.142385	0.46689	6.46478	0.016674	0.191132
REM2	0.626439	0.83305	0.274611	2.50505	1.10966	0.460528	0.58082	1.08823	0.128927	0.103399	0.181924	1.32777	0.92586	0.219343	0.27374	0.565902	1.0075	0.531583	1.6075	0.889716	2.21925	0.810695	3.25286	4.54856	0.607364	1.31716	1.46938	1.11469	2.91787	2.13517	0	1.8325	1.60215	0.799552	0.00165822	-1.06582	1.6818	0.0166932	0.191132
PLEKHM3	17.8535	23.8808	27.873	23.1717	21.6383	20.8773	24.5881	4.13529	18.0497	14.9928	11.6431	19.5182	22.4058	16.6701	16.5613	27.2576	18.8546	21.5291	34.3602	23.5775	25.1884	19.9199	20.8868	31.717	21.1059	32.8091	32.4243	17.6492	23.343	27.9945	12.5794	30.629	27.5569	19.3891	0.049932	-0.367864	4.6104	0.0167182	0.191151
E2F5	0.626439	0.971892	0.274611	0.876768	2.40426	2.76317	0.58082	0.870587	0.515706	2.48157	1.27347	1.32777	0.833274	3.21703	3.28489	1.1318	2.015	0.398688	0.602811	0.444858	0.443849	0.579068	0.51361	0.122934	0.607364	0.83819	0.489793	0.743125	0.324208	0.355862	0.830714	0.916251	0.801073	0.599664	0.00165822	1.22123	1.61725	0.0167652	0.191465
GNB2L1	1674.47	1679.85	1979.95	1392.56	1074.89	775.068	1853.59	2470.07	2761.22	1736.37	1834.34	1650.15	1622.57	2028.78	1453.97	1760.62	1995.71	1989.45	1651.7	1927.12	2333.76	1839.12	2148.6	1670.3	2413.97	2611.56	2424.28	2817.19	1982.37	1656.18	2353.89	1983.81	2314.3	2638.72	0.0718343	-0.318839	10.9554	0.0167731	0.191465
PLEK	631.294	765.295	891.799	382.02	587.009	497.217	657.489	406.999	590.999	414.835	278.525	487.689	486.724	268.33	300.978	414.335	367.737	724.548	642.798	144.579	344.982	434.648	480.568	482.393	512.464	331.803	192.391	225.538	351.928	342.933	194.624	283.514	195.782	260.654	0.14121	0.449466	8.75884	0.0168424	0.191987
ARSA	34.4542	30.9617	25.1269	39.5798	44.3863	30.0878	21.8776	41.3529	31.0713	33.2944	34.7474	36.248	29.5349	32.0972	39.2818	30.2758	45.3374	33.3569	25.519	21.0195	29.6269	23.7418	27.5637	26.062	26.4203	28.8577	22.6285	28.7961	34.3661	23.8428	34.1779	26.1786	26.5956	34.5806	0.0226538	0.279536	5.05986	0.0168463	0.191987
[truncated: 12,746 more rows]
